# Supplementary material for: Success of a weight loss plan for overweight dogs: The results of an international weight loss study
Source: PLoS One. 2017 Sep 8;12(9):e0184199. doi: 10.1371/journal.pone.0184199 (PMC5590893; doi:10.1371/journal.pone.0184199)
Supplement: S2 Dataset — Computer spreadsheet containing study data for the subset of 437 dogs that had complied best with the study visit schedule. These data were used to assess the impact of various factors on weight loss. (XLSX) [file pone.0184199.s003.xlsx]

## Sheet: Sheet1
ID.PATIENT	ID.CLINIC	COUNTRY	SEX	neutered	BIRTHDATE	BREED	BODY.WEIGHT	BCS	TARGET.BODY.WEIGHT	CALLORIE.ALLOCATION	FOOD	PRODUCT	DATE.1st.VISIT	VISIT.NUMBER	VISIT.DATE	QUESTION.2	QUESTION.3	QUESTION.4	kglost	weeks	per.wt.loss.wk	Avcal	ch.cal	Avcalmet	chcalmet	wtlossbetween	wtlossratebetween	weeksbetween	wtlossrate
814613	574232	Norway	male	intact	2012-05-16	Cavalier King Charles Spaniel	14	9	10	452	Mix feeding	wet product : Satiety Weight Management Canine / dry product : Satiety Small Dog	2015-03-24	1	2015-03-24	-1	-1	0	0	0	#N/A	487.833	43	86.75	7.647	0	0	0
814613	574232	Norway	male	intact	2012-05-16	Cavalier King Charles Spaniel	12.7	9	10	495	Mix feeding	wet product : Satiety Weight Management Canine / dry product : Satiety Small Dog	2015-03-24	2	2015-04-07	0	1	-1	-1.3	2	-4.64286	487.833	43	86.75	7.647	-1.3	-9.28571	2	-4.64286
814613	574232	Norway	male	intact	2012-05-16	Cavalier King Charles Spaniel	12.4	9	10	495	Dry	Satiety Small Dog	2015-03-24	3	2015-04-21	1	1	0	-1.6	4	-2.85714	487.833	43	86.75	7.647	-0.3	-2.14286	2	-1.07143
814613	574232	Norway	male	intact	2012-05-16	Cavalier King Charles Spaniel	11.4	9	10	495	Mix feeding	wet product : Satiety Weight Management Canine / dry product : Satiety Small Dog	2015-03-24	4	2015-05-26	1	1	0	-2.6	9	-2.06349	487.833	43	86.75	7.647	-1	-7.14286	5	-1.42857
814613	574232	Norway	male	intact	2012-05-16	Cavalier King Charles Spaniel	10.8	9	10	495	Mix feeding	wet product : Satiety Weight Management Canine / dry product : Satiety Small Dog	2015-03-24	5	2015-06-25	1	1	0	-3.2	13.2857	-1.72043	487.833	43	86.75	7.647	-0.6	-4.28571	4.28571	-1
1790850	1438844	Spain	male	neutered	2006-01-29	Pinscher AlemÃ¡n	4.6	8	3.54	182	Mix feeding	wet product : Satiety Weight Management HÃºmedo / dry product : Satiety Small Dog	2015-01-29	1	2015-01-29	0	-1	-3	0	0	#N/A	193.333	17	74.913	6.587	0	0	0
1790850	1438844	Spain	male	neutered	2006-01-29	Pinscher AlemÃ¡n	4.4	8	3.54	182	Mix feeding	wet product : Satiety Weight Management HÃºmedo / dry product : Satiety Small Dog	2015-01-29	2	2015-02-16	0	-1	0	-0.2	2.57143	-1.69082	193.333	17	74.913	6.587	-0.2	-4.34783	2.57143	-1.69082
1790850	1438844	Spain	male	neutered	2006-01-29	Pinscher AlemÃ¡n	3.95	8	3.54	199	Dry	Satiety Small Dog	2015-01-29	3	2015-03-02	0	-1	0	-0.65	4.57143	-3.09103	193.333	17	74.913	6.587	-0.45	-9.78261	2	-4.8913
1790850	1438844	Spain	male	neutered	2006-01-29	Pinscher AlemÃ¡n	3.6	8	3.54	199	Dry	Satiety Small Dog	2015-01-29	4	2015-03-24	1	1	-1	-1	7.71429	-2.81804	193.333	17	74.913	6.587	-0.35	-7.6087	3.14286	-2.42095
1790850	1438844	Spain	male	neutered	2006-01-29	Pinscher AlemÃ¡n	3.35	8	3.54	199	Dry	Satiety Small Dog	2015-01-29	5	2015-04-09	1	1	-2	-1.25	10	-2.71739	193.333	17	74.913	6.587	-0.25	-5.43478	2.28571	-2.37772
1792714	767624	Netherlands	female	neutered	2003-02-03	Labrador Retriever	32	7	26.67	711	Dry	Satiety Support Dry	2015-02-03	1	2015-02-03	-1	0	0	0	0	#N/A	646	-130	55.045	-11.077	0	0	0
1792714	767624	Netherlands	female	neutered	2003-02-03	Labrador Retriever	31.2	7	26.67	711	Dry	Satiety Support Dry	2015-02-03	2	2015-02-19	-1	0	0	-0.8	2.28571	-1.09375	646	-130	55.045	-11.077	-0.8	-2.5	2.28571	-1.09375
1792714	767624	Netherlands	female	neutered	2003-02-03	Labrador Retriever	30.6	7	26.67	646	Dry	Satiety Support Dry	2015-02-03	3	2015-03-13	0	0	0	-1.4	5.42857	-0.805921	646	-130	55.045	-11.077	-0.6	-1.875	3.14286	-0.596591
1792714	767624	Netherlands	female	neutered	2003-02-03	Labrador Retriever	30	7	26.67	581	Dry	Satiety Small Dog	2015-02-03	4	2015-04-03	-1	0	0	-2	8.42857	-0.741525	646	-130	55.045	-11.077	-0.6	-1.875	3	-0.625
1792714	767624	Netherlands	female	neutered	2003-02-03	Labrador Retriever	29.5	7	26.67	530	Dry	Satiety Weight Management Dry	2015-02-03	5	2015-04-22	0	0	0	-2.5	11.1429	-0.701122	646	-130	55.045	-11.077	-0.5	-1.5625	2.71429	-0.575658
1795256	767624	Netherlands	female	neutered	2009-02-05	Dashond	13.4	7	11.17	370	Dry	Satiety Small Dog	2015-02-05	1	2015-02-05	0	0	-2	0	0	#N/A	336.667	-67	55.101	-10.966	0	0	0
1795256	767624	Netherlands	female	neutered	2009-02-05	Dashond	13	7	11.17	370	Dry	Satiety Small Dog	2015-02-05	2	2015-02-21	-1	0	-2	-0.4	2.28571	-1.30597	336.667	-67	55.101	-10.966	-0.4	-2.98507	2.28571	-1.30597
1795256	767624	Netherlands	female	neutered	2009-02-05	Dashond	13.1	7	11.17	337	Dry	Satiety Small Dog	2015-02-05	3	2015-03-11	0	1	-3	-0.3	4.85714	-0.460931	336.667	-67	55.101	-10.966	0.1	0.746269	2.57143	0.290216
1795256	767624	Netherlands	female	neutered	2009-02-05	Dashond	13	7	11.17	303	Dry	Satiety Small Dog	2015-02-05	4	2015-04-02	0	1	-3	-0.4	8	-0.373134	336.667	-67	55.101	-10.966	-0.1	-0.746269	3.14286	-0.237449
1795256	767624	Netherlands	female	neutered	2009-02-05	Dashond	12.7	7	11.17	276	Dry	Satiety Small Dog	2015-02-05	5	2015-04-24	0	1	-3	-0.7	11.1429	-0.46881	336.667	-67	55.101	-10.966	-0.3	-2.23881	3.14286	-0.712347
1796158	767624	Netherlands	male	intact	2005-02-06	Miniature Pinscher	4.2	7	3.23	194	Dry	Satiety Small Dog	2015-02-10	1	2015-02-10	0	0	-2	0	0	#N/A	216.833	19	89.996	7.886	0	0	0
1796158	767624	Netherlands	male	intact	2005-02-06	Miniature Pinscher	3.9	7	3.23	213	Dry	Satiety Small Dog	2015-02-10	2	2015-02-20	0	1	-2	-0.3	1.42857	-5	216.833	19	89.996	7.886	-0.3	-7.14286	1.42857	-5
1796158	767624	Netherlands	male	intact	2005-02-06	Miniature Pinscher	3.6	7	3.23	234	Dry	Satiety Small Dog	2015-02-10	3	2015-03-13	0	1	-1	-0.6	4.42857	-3.22581	216.833	19	89.996	7.886	-0.3	-7.14286	3	-2.38095
1796158	767624	Netherlands	male	intact	2005-02-06	Miniature Pinscher	4.4	7	3.23	213	Dry	Satiety Small Dog	2015-02-10	4	2015-04-03	0	1	-2	0.2	7.42857	0.641026	216.833	19	89.996	7.886	0.8	19.0476	3	6.34921
1796158	767624	Netherlands	male	intact	2005-02-06	Miniature Pinscher	3.4	7	3.23	213	Dry	Satiety Small Dog	2015-02-10	5	2015-04-24	0	0	-2	-0.8	10.4286	-1.82648	216.833	19	89.996	7.886	-1	-23.8095	3	-7.93651
1797524	767624	Netherlands	male	neutered	2005-02-06	Labrador Retriever	38	7	29.23	886	Dry	Satiety Support Dry	2015-02-07	1	2015-02-07	0	0	-2	0	0	#N/A	897.167	-125	71.368	-9.943	0	0	0
1797524	767624	Netherlands	male	neutered	2005-02-06	Labrador Retriever	38.6	7	29.23	1093	Dry	Satiety Support Dry	2015-02-07	2	2015-02-21	-1	0	0	0.6	2	0.789474	897.167	-125	71.368	-9.943	0.6	1.57895	2	0.789474
1797524	767624	Netherlands	male	neutered	2005-02-06	Labrador Retriever	36.5	7	29.23	941	Dry	Satiety Weight Management Dry	2015-02-07	3	2015-03-20	-1	0	0	-1.5	5.85714	-0.673941	897.167	-125	71.368	-9.943	-2.1	-5.52632	3.85714	-1.43275
1797524	767624	Netherlands	male	neutered	2005-02-06	Labrador Retriever	35.2	7	29.23	761	Dry	Satiety Weight Management Dry	2015-02-07	4	2015-04-10	0	0	0	-2.8	8.85714	-0.831919	897.167	-125	71.368	-9.943	-1.3	-3.42105	3	-1.14035
1797524	767624	Netherlands	male	neutered	2005-02-06	Labrador Retriever	34.05	7	29.23	692	Dry	Satiety Weight Management Dry	2015-02-07	5	2015-05-09	0	0	0	-3.95	13	-0.799595	897.167	-125	71.368	-9.943	-1.15	-3.02632	4.14286	-0.73049
1798307	767624	Netherlands	female	neutered	2008-03-24	Kooikerhondje	19.1	9	14.69	454	Dry	Satiety Support Dry	2015-02-07	1	2015-02-07	-1	1	0	0	0	#N/A	454	0	60.505	0	0	0	0
1798307	767624	Netherlands	female	neutered	2008-03-24	Kooikerhondje	18.25	9	14.69	454	Dry	Satiety Support Dry	2015-02-07	2	2015-02-20	0	0	0	-0.85	1.85714	-2.39629	454	0	60.505	0	-0.85	-4.45026	1.85714	-2.39629
1798307	767624	Netherlands	female	neutered	2008-03-24	Kooikerhondje	17.6	9	14.69	454	Dry	Satiety Support Dry	2015-02-07	3	2015-03-13	1	1	0	-1.5	4.85714	-1.61688	454	0	60.505	0	-0.65	-3.40314	3	-1.13438
1798307	767624	Netherlands	female	neutered	2008-03-24	Kooikerhondje	16.85	9	14.69	454	Dry	Satiety Weight Management Dry	2015-02-07	4	2015-04-03	1	1	0	-2.25	7.85714	-1.49929	454	0	60.505	0	-0.75	-3.9267	3	-1.3089
1798307	767624	Netherlands	female	neutered	2008-03-24	Kooikerhondje	16.45	9	14.69	454	Dry	Satiety Weight Management Dry	2015-02-07	5	2015-04-24	1	1	0	-2.65	10.8571	-1.2779	454	0	60.505	0	-0.4	-2.09424	3	-0.69808
1799632	1488109	USA	male	neutered	2006-02-05	MINI	8.34619	8	6.95364	302	Dry	Satiety Weight Management Dry	2015-02-09	1	2015-02-09	0	1	-2	0	0	#N/A	#N/A	0	#N/A	0	0	0	0
1799632	1488109	USA	male	neutered	2006-02-05	MINI	7.98331	8	6.95364	302	Mix feeding	wet product : Satiety Weight Management Canine / dry product : Satiety Weight Management Dry	2015-02-09	2	2015-02-24	0	0	-1	-0.362878	2.14286	-2.02899	#N/A	0	#N/A	0	-0.362878	-4.34783	2.14286	-2.02899
1799632	1488109	USA	male	neutered	2006-02-05	MINI	#N/A	8	6.95364	#N/A			2015-02-09	3	2015-03-10	0	0	-3	#N/A	4.14286	#N/A	#N/A	0	#N/A	0	#N/A	#N/A	2
1799632	1488109	USA	male	neutered	2006-02-05	MINI	7.66579	8	6.95364	302	Mix feeding	wet product : Satiety Weight Management Canine / dry product : Satiety Weight Management Dry	2015-02-09	4	2015-04-07	1	1	0	-0.680396	8.14286	-1.00114	#N/A	0	#N/A	0	#N/A	#N/A	4
1799632	1488109	USA	male	neutered	2006-02-05	MINI	7.80187	8	6.95364	274	Mix feeding	wet product : Satiety Weight Management Canine / dry product : Satiety Weight Management Dry	2015-02-09	5	2015-05-05	1	1	0	-0.544316	12.1429	-0.537084	#N/A	0	#N/A	0	0.136079	1.63043	4	0.407609
1800270	1492891	USA	male	neutered	2006-12-28	Beagle	25.4014	8	19.541	655	Dry	Satiety Small Dog	2015-02-10	1	2015-02-10	-1	0	-3	0	0	#N/A	613.667	-62	66.027	-6.671	0	0	0
1800270	1492891	USA	male	neutered	2006-12-28	Beagle	24.585	8	19.541	655	Dry	Satiety Weight Management Dry	2015-02-10	2	2015-02-20	0	1	-2	-0.816475	1.42857	-2.25	613.667	-62	66.027	-6.671	-0.816475	-3.21429	1.42857	-2.25
1800270	1492891	USA	male	neutered	2006-12-28	Beagle	24.585	8	19.541	593	Dry	Satiety Weight Management Dry	2015-02-10	3	2015-03-06	0	1	-1	-0.816475	3.42857	-0.9375	613.667	-62	66.027	-6.671	0	0	2	0
1800270	1492891	USA	male	neutered	2006-12-28	Beagle	23.0881	8	19.541	593	Dry	Satiety Weight Management Dry	2015-02-10	4	2015-04-08	0	1	-2	-2.31334	8.14286	-1.11842	613.667	-62	66.027	-6.671	-1.49687	-5.89286	4.71429	-1.25
1800270	1492891	USA	male	neutered	2006-12-28	Beagle	22.3623	8	19.541	532	Mix feeding	wet product : Satiety Weight Management Canine / dry product : Satiety Weight Management Dry	2015-02-10	5	2015-05-06	0	1	-1	-3.0391	12.1429	-0.985294	613.667	-62	66.027	-6.671	-0.725755	-2.85714	4	-0.714286
1800280	767624	Netherlands	female	neutered	2008-09-04	English Cocker Spaniel	19.5	7	15	462	Dry	Satiety Support Dry	2015-02-10	1	2015-02-10	-1	0	0	0	0	#N/A	406	-84	53.267	-11.021	0	0	0
1800280	767624	Netherlands	female	neutered	2008-09-04	English Cocker Spaniel	18.8	7	15	462	Dry	Satiety Support Dry	2015-02-10	2	2015-02-25	0	0	0	-0.7	2.14286	-1.67521	406	-84	53.267	-11.021	-0.7	-3.58974	2.14286	-1.67521
1800280	767624	Netherlands	female	neutered	2008-09-04	English Cocker Spaniel	18.6	7	15	378	Dry	Satiety Small Dog	2015-02-10	3	2015-03-19	0	0	0	-0.9	5.28571	-0.873181	406	-84	53.267	-11.021	-0.2	-1.02564	3.14286	-0.32634
1800280	767624	Netherlands	female	neutered	2008-09-04	English Cocker Spaniel	17.7	7	15	378	Dry	Satiety Small Dog	2015-02-10	4	2015-04-08	0	0	0	-1.8	8.14286	-1.1336	406	-84	53.267	-11.021	-0.9	-4.61538	2.85714	-1.61538
1800280	767624	Netherlands	female	neutered	2008-09-04	English Cocker Spaniel	16.9	7	15	378	Dry	Satiety Small Dog	2015-02-10	5	2015-04-30	0	0	-2	-2.6	11.2857	-1.18143	406	-84	53.267	-11.021	-0.8	-4.10256	3.14286	-1.30536
1800941	1488111	USA	male	neutered	2013-02-26	Welsh Corgi Pembroke	15.6491	7	12.0385	455	Dry	Satiety Weight Management Dry	2015-02-11	1	2015-02-11	0	0	0	0	0	#N/A	412.667	-85	63.851	-13.152	0	0	0
1800941	1488111	USA	male	neutered	2013-02-26	Welsh Corgi Pembroke	15.0594	7	12.0385	455	Dry	Satiety Weight Management Dry	2015-02-11	2	2015-02-25	0	0	-1	-0.589676	2	-1.88406	412.667	-85	63.851	-13.152	-0.589676	-3.76812	2	-1.88406
1800941	1488111	USA	male	neutered	2013-02-26	Welsh Corgi Pembroke	15.2409	7	12.0385	413	Dry	Satiety Weight Management Dry	2015-02-11	3	2015-03-10	0	0	-2	-0.408237	3.85714	-0.676329	412.667	-85	63.851	-13.152	0.181439	1.15942	1.85714	0.624303
1800941	1488111	USA	male	neutered	2013-02-26	Welsh Corgi Pembroke	14.4697	7	12.0385	370	Dry	Satiety Weight Management Dry	2015-02-11	4	2015-04-21	1	1	-3	-1.17935	9.85714	-0.764545	412.667	-85	63.851	-13.152	-0.771115	-4.92754	6	-0.821256
1800941	1488111	USA	male	neutered	2013-02-26	Welsh Corgi Pembroke	14.8326	7	12.0385	335	Dry	Satiety Weight Management Dry	2015-02-11	5	2015-05-05	1	1	-3	-0.816475	11.8571	-0.440021	412.667	-85	63.851	-13.152	0.362878	2.31884	2	1.15942
1800963	1492891	USA	female	neutered	2006-04-15	Golden Retriever	34.7455	7	28.9531	756	Wet	Satiety Weight Management Canine	2015-02-11	1	2015-02-11	-1	0	-1	0	0	#N/A	629.833	-206	50.461	-16.504	0	0	0
1800963	1492891	USA	female	neutered	2006-04-15	Golden Retriever	34.428	7	28.9531	687	Mix feeding	wet product : Satiety Weight Management Canine / dry product : Satiety Weight Management Dry	2015-02-11	2	2015-02-23	0	0	-1	-0.317518	1.71429	-0.533072	629.833	-206	50.461	-16.504	-0.317518	-0.913838	1.71429	-0.533072
1800963	1492891	USA	female	neutered	2006-04-15	Golden Retriever	33.793	7	28.9531	618	Mix feeding	wet product : Satiety Weight Management Canine / dry product : Satiety Weight Management Dry	2015-02-11	3	2015-03-09	1	1	-1	-0.952554	3.71429	-0.7381	629.833	-206	50.461	-16.504	-0.635036	-1.82768	2	-0.913838
1800963	1492891	USA	female	neutered	2006-04-15	Golden Retriever	32.4322	7	28.9531	550	Mix feeding	wet product : Satiety Weight Management Canine / dry product : Satiety Weight Management Dry	2015-02-11	4	2015-04-09	0	0	-1	-2.31334	8.14286	-0.817645	629.833	-206	50.461	-16.504	-1.36079	-3.91645	4.42857	-0.884359
1800963	1492891	USA	female	neutered	2006-04-15	Golden Retriever	31.1621	7	28.9531	495	Mix feeding	wet product : Satiety Weight Management Canine / dry product : Satiety Weight Management Dry	2015-02-11	5	2015-05-05	1	1	-2	-3.58342	11.8571	-0.869798	629.833	-206	50.461	-16.504	-1.27007	-3.65535	3.71429	-0.984133
1802031	767624	Netherlands	female	neutered	2010-11-11	Dashond	8.3	7	6.38	252	Dry	Satiety Small Dog	2015-02-13	1	2015-02-13	1	0	0	0	0	#N/A	#N/A	#N/A	#N/A	#N/A	0	0	0
1802031	767624	Netherlands	female	neutered	2010-11-11	Dashond	7.65	7	6.38	279	Dry	Satiety Small Dog	2015-02-13	2	2015-02-27	0	1	-1	-0.65	2	-3.91566	#N/A	#N/A	#N/A	#N/A	-0.65	-7.83133	2	-3.91566
1802031	767624	Netherlands	female	neutered	2010-11-11	Dashond	7.45	7	6.38	279	Mix feeding	wet product : Satiety Weight Management Canine / dry product : Satiety Small Dog	2015-02-13	3	2015-03-20	0	1	-2	-0.85	5	-2.04819	#N/A	#N/A	#N/A	#N/A	-0.2	-2.40964	3	-0.803213
1802031	767624	Netherlands	female	neutered	2010-11-11	Dashond	#N/A	7	6.38	#N/A			2015-02-13	4	2015-04-10	1	1	0	#N/A	8	#N/A	#N/A	#N/A	#N/A	#N/A	#N/A	#N/A	3
1802031	767624	Netherlands	female	neutered	2010-11-11	Dashond	6.75	7	6.38	279	Mix feeding	wet product : Satiety Weight Management Canine / dry product : Satiety Small Dog	2015-02-13	5	2015-05-01	1	1	0	-1.55	11	-1.6977	#N/A	#N/A	#N/A	#N/A	#N/A	#N/A	3
1802237	1492891	USA	male	neutered	2006-12-27	Pug	16.9192	7	14.0978	513	Dry	Satiety Small Dog	2015-02-13	1	2015-02-13	-1	1	-1	0	0	#N/A	427.667	-136	58.782	-18.693	0	0	0
1802237	1492891	USA	male	neutered	2006-12-27	Pug	16.647	7	14.0978	465	Dry	Satiety Small Dog	2015-02-13	2	2015-02-27	0	1	-1	-0.272158	2	-0.80429	427.667	-136	58.782	-18.693	-0.272158	-1.60858	2	-0.80429
1802237	1492891	USA	male	neutered	2006-12-27	Pug	16.6017	7	14.0978	417	Dry	Satiety Small Dog	2015-02-13	3	2015-03-13	0	0	-1	-0.317518	4	-0.469169	427.667	-136	58.782	-18.693	-0.0453597	-0.268097	2	-0.134048
1802237	1492891	USA	male	neutered	2006-12-27	Pug	15.8759	7	14.0978	377	Dry	Satiety Small Dog	2015-02-13	4	2015-04-10	0	1	-1	-1.04327	8	-0.770777	427.667	-136	58.782	-18.693	-0.725755	-4.28954	4	-1.07239
1802237	1492891	USA	male	neutered	2006-12-27	Pug	15.7852	7	14.0978	337	Dry	Satiety Small Dog	2015-02-13	5	2015-05-08	1	1	-1	-1.13399	12	-0.558534	427.667	-136	58.782	-18.693	-0.0907194	-0.536193	4	-0.134048
1802298	1492891	USA	female	neutered	2009-04-30	Labrador Retriever	31.9332	7	26.6125	709	Dry	Satiety Weight Management Dry	2015-02-13	1	2015-02-13	1	1	-1	0	0	#N/A	644.667	-129	55.02	-11.01	0	0	0
1802298	1492891	USA	female	neutered	2009-04-30	Labrador Retriever	31.0714	7	26.6125	709	Dry	Satiety Weight Management Dry	2015-02-13	2	2015-02-27	1	1	-1	-0.861834	2	-1.34943	644.667	-129	55.02	-11.01	-0.861834	-2.69886	2	-1.34943
1802298	1492891	USA	female	neutered	2009-04-30	Labrador Retriever	30.8446	7	26.6125	645	Dry	Satiety Weight Management Dry	2015-02-13	3	2015-03-13	0	1	-1	-1.08863	4	-0.852273	644.667	-129	55.02	-11.01	-0.226799	-0.710227	2	-0.355114
1802298	1492891	USA	female	neutered	2009-04-30	Labrador Retriever	29.756	7	26.6125	580	Dry	Satiety Weight Management Dry	2015-02-13	4	2015-04-10	1	1	-1	-2.17727	8	-0.852273	644.667	-129	55.02	-11.01	-1.08863	-3.40909	4	-0.852273
1802298	1492891	USA	female	neutered	2009-04-30	Labrador Retriever	28.3045	7	26.6125	529	Dry	Satiety Weight Management Dry	2015-02-13	5	2015-05-08	1	1	-1	-3.62878	12	-0.94697	644.667	-129	55.02	-11.01	-1.45151	-4.54545	4	-1.13636
1803737	1488109	USA	male	neutered	2012-06-17	Labrador Retriever	39.5537	8	32.9629	969	Dry	Satiety Weight Management Dry	2015-02-16	1	2015-02-16	1	-1	-3	0	0	#N/A	807.5	-257	58.698	-18.682	0	0	0
1803737	1488109	USA	male	neutered	2012-06-17	Labrador Retriever	39.3722	8	32.9629	878	Dry	Satiety Weight Management Dry	2015-02-16	2	2015-03-03	1	1	-3	-0.181439	2.14286	-0.214067	807.5	-257	58.698	-18.682	-0.181439	-0.458716	2.14286	-0.214067
1803737	1488109	USA	male	neutered	2012-06-17	Labrador Retriever	39.5537	8	32.9629	787	Dry	Satiety Weight Management Dry	2015-02-16	3	2015-03-13	1	1	-3	0	3.57143	0	807.5	-257	58.698	-18.682	0.181439	0.458716	1.42857	0.321101
1803737	1488109	USA	male	neutered	2012-06-17	Labrador Retriever	38.0568	8	32.9629	712	Dry	Satiety Weight Management Dry	2015-02-16	4	2015-04-14	1	1	-1	-1.49687	8.14286	-0.464751	807.5	-257	58.698	-18.682	-1.49687	-3.7844	4.57143	-0.827838
1803737	1488109	USA	male	neutered	2012-06-17	Labrador Retriever	37.4671	8	32.9629	636	Dry	Satiety Weight Management Dry	2015-02-16	5	2015-05-12	1	1	-3	-2.08655	12.1429	-0.434431	807.5	-257	58.698	-18.682	-0.589676	-1.49083	4	-0.372706
1806024	992342	Netherlands	female	neutered	2009-02-01	Duitse Herder	32	7	22.86	633	Dry	Satiety Support Dry	2015-02-18	1	2015-02-18	0	0	-1	0	0	#N/A	633	0	60.548	0	0	0	0
1806024	992342	Netherlands	female	neutered	2009-02-01	Duitse Herder	31.2	7	22.86	633	Dry	Satiety Support Dry	2015-02-18	2	2015-03-04	0	0	-1	-0.8	2	-1.25	633	0	60.548	0	-0.8	-2.5	2	-1.25
1806024	992342	Netherlands	female	neutered	2009-02-01	Duitse Herder	30	7	22.86	633	Dry	Satiety Weight Management Dry	2015-02-18	3	2015-03-26	0	0	-1	-2	5.14286	-1.21528	633	0	60.548	0	-1.2	-3.75	3.14286	-1.19318
1806024	992342	Netherlands	female	neutered	2009-02-01	Duitse Herder	28.7	7	22.86	633	Dry	Satiety Weight Management Dry	2015-02-18	4	2015-04-15	1	0	-1	-3.3	8	-1.28906	633	0	60.548	0	-1.3	-4.0625	2.85714	-1.42188
1806024	992342	Netherlands	female	neutered	2009-02-01	Duitse Herder	27.8	7	22.86	633	Dry	Satiety Weight Management Dry	2015-02-18	5	2015-05-06	1	0	-2	-4.2	11	-1.19318	633	0	60.548	0	-0.9	-2.8125	3	-0.9375
1807235	1491877	USA	male	neutered	2009-10-01	English Bulldog	27.8509	7	21.3191	699	Dry	Satiety Weight Management Dry	2015-02-19	1	2015-02-19	-1	0	-1	0	0	#N/A	677	-66	68.236	-6.652	0	0	0
1807235	1491877	USA	male	neutered	2009-10-01	English Bulldog	26.8529	7	21.3191	699	Dry	Satiety Weight Management Dry	2015-02-19	2	2015-03-05	0	1	-1	-0.997913	2	-1.79153	677	-66	68.236	-6.652	-0.997913	-3.58306	2	-1.79153
1807235	1491877	USA	male	neutered	2009-10-01	English Bulldog	26.1725	7	21.3191	699	Dry	Satiety Weight Management Dry	2015-02-19	3	2015-03-24	0	0	-3	-1.67831	4.71429	-1.27825	677	-66	68.236	-6.652	-0.680396	-2.443	2.71429	-0.900051
1807235	1491877	USA	male	neutered	2009-10-01	English Bulldog	26.0818	7	21.3191	633	Dry	Satiety Weight Management Dry	2015-02-19	4	2015-04-15	1	1	-2	-1.76903	7.85714	-0.80841	677	-66	68.236	-6.652	-0.0907194	-0.325733	3.14286	-0.103642
1807235	1491877	USA	male	neutered	2009-10-01	English Bulldog	25.9004	7	21.3191	568	Dry	Satiety Weight Management Dry	2015-02-19	5	2015-05-13	1	1	-2	-1.95047	11.8571	-0.590636	677	-66	68.236	-6.652	-0.181439	-0.651466	4	-0.162866
1807236	1491877	USA	female	neutered	2007-10-27	English Bulldog	25.6282	8	21.7727	610	Dry	Satiety Weight Management Dry	2015-02-19	1	2015-02-19	-1	0	-1	0	0	#N/A	508.5	-166	50.45	-16.469	0	0	0
1807236	1491877	USA	female	neutered	2007-10-27	English Bulldog	26.354	8	21.7727	555	Dry	Satiety Weight Management Dry	2015-02-19	2	2015-03-05	-1	0	0	0.725755	2	1.41593	508.5	-166	50.45	-16.469	0.725755	2.83186	2	1.41593
1807236	1491877	USA	female	neutered	2007-10-27	English Bulldog	26.354	8	21.7727	499	Dry	Satiety Weight Management Dry	2015-02-19	3	2015-03-24	1	1	-1	0.725755	4.71429	0.600697	508.5	-166	50.45	-16.469	0	0	2.71429	0
1807236	1491877	USA	female	neutered	2007-10-27	English Bulldog	25.22	8	21.7727	444	Dry	Satiety Weight Management Dry	2015-02-19	4	2015-04-15	1	1	-1	-0.408237	7.85714	-0.202735	508.5	-166	50.45	-16.469	-1.13399	-4.42478	3.14286	-1.40788
1807236	1491877	USA	female	neutered	2007-10-27	English Bulldog	25.4014	8	21.7727	400	Dry	Satiety Weight Management Dry	2015-02-19	5	2015-05-14	1	1	-1	-0.226799	12	-0.0737463	508.5	-166	50.45	-16.469	0.181439	0.707965	4.14286	0.170888
1808588	1486088	USA	male	neutered	2008-02-20	Schnauzer Miniatura	14.5151	7	11.1676	431	Mix feeding	wet product : Satiety Weight Management Canine / dry product : Satiety Small Dog	2015-02-21	1	2015-02-21	-1	0	0	0	0	#N/A	366.667	-193	60.021	-31.593	0	0	0
1808588	1486088	USA	male	neutered	2008-02-20	Schnauzer Miniatura	14.0615	7	11.1676	431	Mix feeding	wet product : Satiety Weight Management Canine / dry product : Satiety Weight Management Dry	2015-02-21	2	2015-03-09	-1	0	0	-0.453597	2.28571	-1.36719	366.667	-193	60.021	-31.593	-0.453597	-3.125	2.28571	-1.36719
1808588	1486088	USA	male	neutered	2008-02-20	Schnauzer Miniatura	13.4265	7	11.1676	431	Mix feeding	wet product : Satiety Weight Management Canine / dry product : Satiety Weight Management Dry	2015-02-21	3	2015-03-23	0	1	0	-1.08863	4.28571	-1.75	366.667	-193	60.021	-31.593	-0.635036	-4.375	2	-2.1875
1808588	1486088	USA	male	neutered	2008-02-20	Schnauzer Miniatura	12.9275	7	11.1676	238	Mix feeding	wet product : Satiety Weight Management Canine / dry product : Satiety Weight Management Dry	2015-02-21	4	2015-04-25	0	1	-1	-1.58759	9	-1.21528	366.667	-193	60.021	-31.593	-0.498957	-3.4375	4.71429	-0.729167
1808588	1486088	USA	male	neutered	2008-02-20	Schnauzer Miniatura	12.9275	7	11.1676	216	Mix feeding	wet product : Satiety Weight Management Canine / dry product : Satiety Weight Management Dry	2015-02-21	5	2015-05-30	0	1	-2	-1.58759	14	-0.78125	366.667	-193	60.021	-31.593	0	0	5	0
1809106	767624	Netherlands	male	neutered	2009-02-23	Kooikerhondje	19.6	8	15.08	539	Dry	Satiety Support Dry	2015-02-23	1	2015-02-23	-1	-1	-3	0	0	#N/A	539	0	70.435	0	0	0	0
1809106	767624	Netherlands	male	neutered	2009-02-23	Kooikerhondje	19	8	15.08	539	Dry	Satiety Support Dry	2015-02-23	2	2015-03-09	0	-1	-3	-0.6	2	-1.53061	539	0	70.435	0	-0.6	-3.06122	2	-1.53061
1809106	767624	Netherlands	male	neutered	2009-02-23	Kooikerhondje	18.3	8	15.08	539	Dry	Satiety Weight Management Dry	2015-02-23	3	2015-03-30	0	-1	-2	-1.3	5	-1.32653	539	0	70.435	0	-0.7	-3.57143	3	-1.19048
1809106	767624	Netherlands	male	neutered	2009-02-23	Kooikerhondje	17.55	8	15.08	539	Dry	Satiety Weight Management Dry	2015-02-23	4	2015-04-24	1	0	-1	-2.05	8.57143	-1.22024	539	0	70.435	0	-0.75	-3.82653	3.57143	-1.07143
1809106	767624	Netherlands	male	neutered	2009-02-23	Kooikerhondje	17	8	15.08	539	Dry	Satiety Weight Management Dry	2015-02-23	5	2015-05-15	1	1	-1	-2.6	11.5714	-1.14638	539	0	70.435	0	-0.55	-2.80612	3	-0.935374
1809133	1438844	Spain	female	neutered	2011-02-23	Teckel	6.8	9	5.23	210	Dry	Satiety Small Dog	2015-02-23	1	2015-02-23	0	1	-1	0	0	#N/A	229.167	23	66.264	6.65	0	0	0
1809133	1438844	Spain	female	neutered	2011-02-23	Teckel	6.2	9	5.23	233	Dry	Satiety Small Dog	2015-02-23	2	2015-03-09	0	0	-1	-0.6	2	-4.41176	229.167	23	66.264	6.65	-0.6	-8.82353	2	-4.41176
1809133	1438844	Spain	female	neutered	2011-02-23	Teckel	6.3	9	5.23	233	Dry	Satiety Small Dog	2015-02-23	3	2015-03-23	0	0	-1	-0.5	4	-1.83824	229.167	23	66.264	6.65	0.1	1.47059	2	0.735294
1809133	1438844	Spain	female	neutered	2011-02-23	Teckel	6.15	9	5.23	233	Dry	Satiety Small Dog	2015-02-23	4	2015-04-13	1	1	-1	-0.65	7	-1.36555	229.167	23	66.264	6.65	-0.15	-2.20588	3	-0.735294
1809133	1438844	Spain	female	neutered	2011-02-23	Teckel	6.1	9	5.23	233	Dry	Satiety Small Dog	2015-02-23	5	2015-05-04	1	1	-1	-0.7	10	-1.02941	229.167	23	66.264	6.65	-0.05	-0.735294	3	-0.245098
1809201	1429136	Spain	male	neutered	2010-10-26	Medium	30.3	7	23.31	747	Dry	Satiety Weight Management Dry	2015-02-23	1	2015-02-23	0	1	-3	0	0	#N/A	747	0	70.415	0	0	0	0
1809201	1429136	Spain	male	neutered	2010-10-26	Medium	28.8	7	23.31	747	Dry	Satiety Weight Management Dry	2015-02-23	2	2015-03-09	1	1	-3	-1.5	2	-2.47525	747	0	70.415	0	-1.5	-4.9505	2	-2.47525
1809201	1429136	Spain	male	neutered	2010-10-26	Medium	27.35	7	23.31	747	Dry	Satiety Weight Management Dry	2015-02-23	3	2015-03-23	1	1	-3	-2.95	4	-2.43399	747	0	70.415	0	-1.45	-4.78548	2	-2.39274
1809201	1429136	Spain	male	neutered	2010-10-26	Medium	25.25	7	23.31	747	Dry	Satiety Weight Management Dry	2015-02-23	4	2015-04-20	0	1	-3	-5.05	8	-2.08333	747	0	70.415	0	-2.1	-6.93069	4	-1.73267
1809201	1429136	Spain	male	neutered	2010-10-26	Medium	23.85	7	23.31	747	Dry	Satiety Weight Management Dry	2015-02-23	5	2015-05-18	0	1	-3	-6.45	12	-1.77393	747	0	70.415	0	-1.4	-4.62046	4	-1.15512
1809694	1429136	Spain	female	intact	2009-02-01	Cavalier King Charles	10.2	7	7.85	284	Dry	Satiety Small Dog	2015-02-23	1	2015-02-23	0	0	-2	0	0	#N/A	284	0	60.557	0	0	0	0
1809694	1429136	Spain	female	intact	2009-02-01	Cavalier King Charles	9.9	7	7.85	284	Dry	Satiety Small Dog	2015-02-23	2	2015-03-09	0	0	-2	-0.3	2	-1.47059	284	0	60.557	0	-0.3	-2.94118	2	-1.47059
1809694	1429136	Spain	female	intact	2009-02-01	Cavalier King Charles	9.4	7	7.85	284	Dry	Satiety Small Dog	2015-02-23	3	2015-03-23	0	0	-2	-0.8	4	-1.96078	284	0	60.557	0	-0.5	-4.90196	2	-2.45098
1809694	1429136	Spain	female	intact	2009-02-01	Cavalier King Charles	8.2	7	7.85	284	Dry	Satiety Small Dog	2015-02-23	4	2015-04-20	0	1	-2	-2	8	-2.45098	284	0	60.557	0	-1.2	-11.7647	4	-2.94118
1809694	1429136	Spain	female	intact	2009-02-01	Cavalier King Charles	8.45	7	7.85	284	Dry	Satiety Small Dog	2015-02-23	5	2015-05-18	0	1	-3	-1.75	12	-1.42974	284	0	60.557	0	0.25	2.45098	4	0.612745
1809710	1429136	Spain	male	intact	2007-04-11	Labrador Retriever	48.15	9	37.04	1206	Dry	Satiety Weight Management Dry	2015-02-23	1	2015-02-23	-1	0	-2	0	0	#N/A	1167.67	-115	77.771	-7.659	0	0	0
1809710	1429136	Spain	male	intact	2007-04-11	Labrador Retriever	45.8	9	37.04	1206	Dry	Satiety Weight Management Dry	2015-02-23	2	2015-03-09	0	0	0	-2.35	2	-2.44029	1167.67	-115	77.771	-7.659	-2.35	-4.88058	2	-2.44029
1809710	1429136	Spain	male	intact	2007-04-11	Labrador Retriever	44.8	9	37.04	1206	Dry	Satiety Weight Management Dry	2015-02-23	3	2015-03-23	0	0	0	-3.35	4	-1.73936	1167.67	-115	77.771	-7.659	-1	-2.07684	2	-1.03842
1809710	1429136	Spain	male	intact	2007-04-11	Labrador Retriever	44.8	9	37.04	1091	Dry	Satiety Weight Management Dry	2015-02-23	4	2015-04-20	0	0	0	-3.35	8	-0.869678	1167.67	-115	77.771	-7.659	0	0	4	0
1809710	1429136	Spain	male	intact	2007-04-11	Labrador Retriever	43.2	9	37.04	1091	Dry	Satiety Weight Management Dry	2015-02-23	5	2015-05-04	0	0	-3	-4.95	10	-1.02804	1167.67	-115	77.771	-7.659	-1.6	-3.32295	2	-1.66147
1809732	1492891	USA	female	neutered	2011-02-21	Medium	33.1126	7	27.5923	729	Dry	Satiety Weight Management Dry	2015-02-23	1	2015-02-23	-1	0	0	0	0	#N/A	729	0	60.553	0	0	0	0
1809732	1492891	USA	female	neutered	2011-02-21	Medium	31.6611	7	27.5923	729	Dry	Satiety Weight Management Dry	2015-02-23	2	2015-03-10	0	1	0	-1.45151	2.14286	-2.04566	729	0	60.553	0	-1.45151	-4.38356	2.14286	-2.04566
1809732	1492891	USA	female	neutered	2011-02-21	Medium	30.9353	7	27.5923	729	Dry	Satiety Weight Management Dry	2015-02-23	3	2015-03-23	0	0	-2	-2.17727	4	-1.64384	729	0	60.553	0	-0.725755	-2.19178	1.85714	-1.18019
1809732	1492891	USA	female	neutered	2011-02-21	Medium	30.391	7	27.5923	729	Dry	Satiety Weight Management Dry	2015-02-23	4	2015-04-21	0	0	-1	-2.72158	8.14286	-1.00937	729	0	60.553	0	-0.544316	-1.64384	4.14286	-0.396788
1809732	1492891	USA	female	neutered	2011-02-21	Medium	29.8467	7	27.5923	663	Dry	Satiety Weight Management Dry	2015-02-23	5	2015-05-21	1	1	-1	-3.2659	12.4286	-0.793576	729	0	60.553	0	-0.544316	-1.64384	4.28571	-0.383562
1809938	767624	Netherlands	female	neutered	2013-02-24	SMALL	8.9	8	6.85	257	Dry	Satiety Small Dog	2015-02-24	1	2015-02-24	0	0	-2	0	0	#N/A	215.333	-66	50.856	-15.587	0	0	0
1809938	767624	Netherlands	female	neutered	2013-02-24	SMALL	9	8	6.85	233	Dry	Satiety Small Dog	2015-02-24	2	2015-03-10	0	0	-2	0.1	2	0.561798	215.333	-66	50.856	-15.587	0.1	1.1236	2	0.561798
1809938	767624	Netherlands	female	neutered	2013-02-24	SMALL	8.8	8	6.85	210	Dry	Satiety Small Dog	2015-02-24	3	2015-03-31	0	0	-2	-0.1	5	-0.224719	215.333	-66	50.856	-15.587	-0.2	-2.24719	3	-0.749064
1809938	767624	Netherlands	female	neutered	2013-02-24	SMALL	8.9	8	6.85	191	Dry	Satiety Small Dog	2015-02-24	4	2015-04-21	0	0	-2	0	8	0	215.333	-66	50.856	-15.587	0.1	1.1236	3	0.374532
1809938	767624	Netherlands	female	neutered	2013-02-24	SMALL	8.8	8	6.85	210	Dry	Satiety Small Dog	2015-02-24	5	2015-05-21	0	0	-1	-0.1	12.2857	-0.0914554	215.333	-66	50.856	-15.587	-0.1	-1.1236	4.28571	-0.262172
1810181	767624	Netherlands	female	neutered	2011-02-24	Chihuahua	4.9	8	3.77	164	Mix feeding	wet product : Satiety Weight Management Canine / dry product : Satiety Small Dog	2015-02-24	1	2015-02-24	0	-1	-3	0	0	#N/A	164	0	60.616	0	0	0	0
1810181	767624	Netherlands	female	neutered	2011-02-24	Chihuahua	4.8	8	3.77	164	Mix feeding	wet product : Satiety Weight Management Canine / dry product : Satiety Support Dry	2015-02-24	2	2015-03-09	0	1	-3	-0.1	1.85714	-1.0989	164	0	60.616	0	-0.1	-2.04082	1.85714	-1.0989
1810181	767624	Netherlands	female	neutered	2011-02-24	Chihuahua	4.6	8	3.77	164	Mix feeding	wet product : Satiety Weight Management Canine / dry product : Satiety Small Dog	2015-02-24	3	2015-03-30	0	0	-2	-0.3	4.85714	-1.2605	164	0	60.616	0	-0.2	-4.08163	3	-1.36054
1810181	767624	Netherlands	female	neutered	2011-02-24	Chihuahua	4.5	8	3.77	164	Dry	Satiety Small Dog	2015-02-24	4	2015-04-20	0	0	-1	-0.4	7.85714	-1.03896	164	0	60.616	0	-0.1	-2.04082	3	-0.680272
1810181	767624	Netherlands	female	neutered	2011-02-24	Chihuahua	4.4	8	3.77	149	Dry	Satiety Small Dog	2015-02-24	5	2015-05-11	0	0	-1	-0.5	10.8571	-0.93985	164	0	60.616	0	-0.1	-2.04082	3	-0.680272
1810186	767624	Netherlands	female	neutered	2011-05-16	Chihuahua	3.3	8	2.54	171	Mix feeding	wet product : Satiety Weight Management Canine / dry product : Satiety Small Dog	2015-02-24	1	2015-02-24	1	-1	-3	0	0	#N/A	171	0	84.991	0	0	0	0
1810186	767624	Netherlands	female	neutered	2011-05-16	Chihuahua	3.2	8	2.54	171	Mix feeding	wet product : Satiety Weight Management Canine / dry product : Satiety Support Dry	2015-02-24	2	2015-03-09	0	0	-3	-0.1	1.85714	-1.6317	171	0	84.991	0	-0.1	-3.0303	1.85714	-1.6317
1810186	767624	Netherlands	female	neutered	2011-05-16	Chihuahua	3.1	8	2.54	171	Mix feeding	wet product : Satiety Weight Management Canine / dry product : Satiety Small Dog	2015-02-24	3	2015-03-30	0	0	-2	-0.2	4.85714	-1.24777	171	0	84.991	0	-0.1	-3.0303	3	-1.0101
1810186	767624	Netherlands	female	neutered	2011-05-16	Chihuahua	2.9	8	2.54	171	Dry	Satiety Small Dog	2015-02-24	4	2015-04-20	0	0	-1	-0.4	7.85714	-1.5427	171	0	84.991	0	-0.2	-6.06061	3	-2.0202
1810186	767624	Netherlands	female	neutered	2011-05-16	Chihuahua	3.1	8	2.54	155	Dry	Satiety Small Dog	2015-02-24	5	2015-05-11	0	0	-1	-0.2	10.8571	-0.558214	171	0	84.991	0	0.2	6.06061	3	2.0202
1811202	1488109	USA	female	neutered	2010-02-23	X-SMALL	26.5354	8	22.1129	617	Dry	Satiety Weight Management Dry	2015-02-25	1	2015-02-25	0	1	-2	0	0	#N/A	639.667	0	62.729	0	0	0	0
1811202	1488109	USA	female	neutered	2010-02-23	X-SMALL	26.0365	8	22.1129	617	Dry	Satiety Weight Management Dry	2015-02-25	2	2015-03-10	0	1	-1	-0.498957	1.85714	-1.01249	639.667	0	62.729	0	-0.498957	-1.88034	1.85714	-1.01249
1811202	1488109	USA	female	neutered	2010-02-23	X-SMALL	23.2242	8	22.1129	685	Dry	Satiety Weight Management Dry	2015-02-25	3	2015-03-24	1	1	-1	-3.31126	3.85714	-3.2352	639.667	0	62.729	0	-2.8123	-10.5983	2	-5.29915
1811202	1488109	USA	female	neutered	2010-02-23	X-SMALL	24.7664	8	22.1129	617	Dry	Satiety Weight Management Dry	2015-02-25	4	2015-04-22	1	1	-1	-1.76903	8	-0.833333	639.667	0	62.729	0	1.54223	5.81197	4.14286	1.40289
1811202	1488109	USA	female	neutered	2010-02-23	X-SMALL	24.3582	8	22.1129	550	Dry	Satiety Weight Management Dry	2015-02-25	5	2015-05-20	0	1	0	-2.17727	12	-0.683761	639.667	0	62.729	0	-0.408237	-1.53846	4	-0.384615
1811287	1072165	Denmark	male	neutered	2008-11-13	Dansk-svensk GÃ¥rdshund	11.9	8	9.92	394	Dry	Satiety Small Dog - overvÃ¦gtsdiÃ¦t	2015-02-26	1	2015-02-26	1	0	-1	0	0	#N/A	377.667	-49	67.565	-8.766	0	0	0
1811287	1072165	Denmark	male	neutered	2008-11-13	Dansk-svensk GÃ¥rdshund	11.5	8	9.92	394	Dry	Satiety Small Dog - overvÃ¦gtsdiÃ¦t	2015-02-26	2	2015-03-12	0	0	-1	-0.4	2	-1.68067	377.667	-49	67.565	-8.766	-0.4	-3.36134	2	-1.68067
1811287	1072165	Denmark	male	neutered	2008-11-13	Dansk-svensk GÃ¥rdshund	11.34	8	9.92	394	Dry	Satiety Small Dog - overvÃ¦gtsdiÃ¦t	2015-02-26	3	2015-03-25	1	0	-1	-0.56	3.85714	-1.22004	377.667	-49	67.565	-8.766	-0.16	-1.34454	1.85714	-0.723982
1811287	1072165	Denmark	male	neutered	2008-11-13	Dansk-svensk GÃ¥rdshund	11	8	9.92	345	Dry	Satiety Weight Management - overvÃ¦gtsdiÃ¦t	2015-02-26	4	2015-05-05	0	0	-1	-0.9	9.71429	-0.778547	377.667	-49	67.565	-8.766	-0.34	-2.85714	5.85714	-0.487805
1811287	1072165	Denmark	male	neutered	2008-11-13	Dansk-svensk GÃ¥rdshund	10.3	8	9.92	345	Dry	Satiety Weight Management - overvÃ¦gtsdiÃ¦t	2015-02-26	5	2015-05-28	0	0	-1	-1.6	13	-1.03426	377.667	-49	67.565	-8.766	-0.7	-5.88235	3.28571	-1.79028
1811621	1072650	Denmark	male	neutered	2011-04-22	Golden Retriever	45.6	7	35.08	984	Mix feeding	wet product : Satiety Weight Management - overvÃ¦gtsdiÃ¦t, vÃ¥dfoder / dry product : Satiety Weight Management - overvÃ¦gtsdiÃ¦t	2015-02-26	1	2015-02-26	0	0	-2	0	0	#N/A	888.333	-191	61.628	-13.251	0	0	0
1811621	1072650	Denmark	male	neutered	2011-04-22	Golden Retriever	44.15	7	35.08	984	Mix feeding	wet product : Satiety Weight Management - overvÃ¦gtsdiÃ¦t, vÃ¥dfoder / dry product : Satiety Weight Management - overvÃ¦gtsdiÃ¦t	2015-02-26	2	2015-03-12	1	1	-1	-1.45	2	-1.58991	888.333	-191	61.628	-13.251	-1.45	-3.17982	2	-1.58991
1811621	1072650	Denmark	male	neutered	2011-04-22	Golden Retriever	43.65	7	35.08	888	Mix feeding	wet product : Satiety Weight Management - overvÃ¦gtsdiÃ¦t, vÃ¥dfoder / dry product : Satiety Weight Management - overvÃ¦gtsdiÃ¦t	2015-02-26	3	2015-04-09	0	0	-1	-1.95	6	-0.712719	888.333	-191	61.628	-13.251	-0.5	-1.09649	4	-0.274123
1811621	1072650	Denmark	male	neutered	2011-04-22	Golden Retriever	43.8	7	35.08	793	Mix feeding	wet product : Satiety Weight Management - overvÃ¦gtsdiÃ¦t, vÃ¥dfoder / dry product : Satiety Weight Management - overvÃ¦gtsdiÃ¦t	2015-02-26	4	2015-05-07	0	0	-1	-1.8	10	-0.394737	888.333	-191	61.628	-13.251	0.15	0.328947	4	0.0822368
1811621	1072650	Denmark	male	neutered	2011-04-22	Golden Retriever	42.9	7	35.08	714	Mix feeding	wet product : Satiety Weight Management - overvÃ¦gtsdiÃ¦t, vÃ¥dfoder / dry product : Satiety Weight Management - overvÃ¦gtsdiÃ¦t	2015-02-26	5	2015-06-04	1	1	-1	-2.7	14	-0.422932	888.333	-191	61.628	-13.251	-0.9	-1.97368	4	-0.493421
1811684	1494944	Spain	female	neutered	2008-03-07	others	16.8	7	12.92	413	Mix feeding	wet product : Satiety Weight Management HÃºmedo / dry product : Satiety Weight Management Dry	2015-02-26	1	2015-02-26	0	0	-1	0	0	#N/A	413	0	60.604	0	0	0	0
1811684	1494944	Spain	female	neutered	2008-03-07	others	15.6	7	12.92	413	Mix feeding	wet product : Satiety Weight Management HÃºmedo / dry product : Satiety Weight Management Dry	2015-02-26	2	2015-03-12	0	0	-3	-1.2	2	-3.57143	413	0	60.604	0	-1.2	-7.14286	2	-3.57143
1811684	1494944	Spain	female	neutered	2008-03-07	others	14.2	7	12.92	413	Mix feeding	wet product : Satiety Weight Management HÃºmedo / dry product : Satiety Weight Management Dry	2015-02-26	3	2015-03-31	0	0	-3	-2.6	4.71429	-3.28283	413	0	60.604	0	-1.4	-8.33333	2.71429	-3.07018
1811684	1494944	Spain	female	neutered	2008-03-07	others	14	7	12.92	413	Mix feeding	wet product : Satiety Weight Management HÃºmedo / dry product : Satiety Weight Management Dry	2015-02-26	4	2015-04-30	1	1	-3	-2.8	9	-1.85185	413	0	60.604	0	-0.2	-1.19048	4.28571	-0.277778
1811684	1494944	Spain	female	neutered	2008-03-07	others	13.2	7	12.92	413	Mix feeding	wet product : Satiety Weight Management HÃºmedo / dry product : Satiety Weight Management Dry	2015-02-26	5	2015-06-01	1	1	-3	-3.6	13.5714	-1.57895	413	0	60.604	0	-0.8	-4.7619	4.57143	-1.04167
1811860	1502809	Germany	male	neutered	2010-02-26	others	25.8	7	19.85	756	Dry	Satiety Weight Management Dry	2015-02-27	1	2015-02-27	0	0	-2	0	0	#N/A	756	0	80.39	0	0	0	0
1811860	1502809	Germany	male	neutered	2010-02-26	others	25.4	7	19.85	756	Dry	Satiety Weight Management Dry	2015-02-27	2	2015-03-04	0	0	-2	-0.4	0.714286	-2.17054	756	0	80.39	0	-0.4	-1.55039	0.714286	-2.17054
1811860	1502809	Germany	male	neutered	2010-02-26	others	24.35	7	19.85	756	Dry	Satiety Weight Management Dry	2015-02-27	3	2015-03-31	0	0	-2	-1.45	4.57143	-1.22941	756	0	80.39	0	-1.05	-4.06977	3.85714	-1.05512
1811860	1502809	Germany	male	neutered	2010-02-26	others	23.4	7	19.85	756	Dry	Satiety Weight Management Dry	2015-02-27	4	2015-04-21	0	0	-2	-2.4	7.57143	-1.22861	756	0	80.39	0	-0.95	-3.68217	3	-1.22739
1811860	1502809	Germany	male	neutered	2010-02-26	others	22	7	19.85	756	Dry	Satiety Weight Management Dry	2015-02-27	5	2015-06-02	0	0	-1	-3.8	13.5714	-1.08527	756	0	80.39	0	-1.4	-5.42636	6	-0.904393
1811937	1491877	USA	female	neutered	2008-01-10	Samoyed	36.8774	8	29.0302	881	Dry	Satiety Weight Management Dry	2015-02-28	1	2015-02-28	0	1	-2	0	0	#N/A	757.167	-165	60.542	-13.193	0	0	0
1811937	1491877	USA	female	neutered	2008-01-10	Samoyed	36.6053	8	29.0302	798	Dry	Satiety Weight Management Dry	2015-02-28	2	2015-03-13	0	1	-2	-0.272158	1.85714	-0.397389	757.167	-165	60.542	-13.193	-0.272158	-0.738007	1.85714	-0.397389
1811937	1491877	USA	female	neutered	2008-01-10	Samoyed	35.8795	8	29.0302	716	Dry	Satiety Weight Management Dry	2015-02-28	3	2015-03-31	1	1	-2	-0.997913	4.42857	-0.611038	757.167	-165	60.542	-13.193	-0.725755	-1.96802	2.57143	-0.765341
1811937	1491877	USA	female	neutered	2008-01-10	Samoyed	32.659	8	29.0302	716	Dry	Satiety Weight Management Dry	2015-02-28	4	2015-04-21	1	1	-1	-4.21845	7.42857	-1.53988	757.167	-165	60.542	-13.193	-3.22054	-8.73309	3	-2.91103
1811937	1491877	USA	female	neutered	2008-01-10	Samoyed	34.6095	8	29.0302	647	Dry	Satiety Weight Management Dry	2015-02-28	5	2015-05-19	1	1	-1	-2.26799	11.4286	-0.53813	757.167	-165	60.542	-13.193	1.95047	5.28905	4	1.32226
1812035	767632	Netherlands	female	neutered	2013-02-27	Chihuahua	3.5	8	2.69	178	Dry	Satiety Small Dog	2015-02-27	1	2015-02-27	-1	1	-1	0	0	#N/A	147.667	-48	70.302	-22.852	0	0	0
1812035	767632	Netherlands	female	neutered	2013-02-27	Chihuahua	3.5	8	2.69	160	Dry	Satiety Small Dog	2015-02-27	2	2015-03-14	0	1	-3	0	2.14286	0	147.667	-48	70.302	-22.852	0	0	2.14286	0
1812035	767632	Netherlands	female	neutered	2013-02-27	Chihuahua	3.5	8	2.69	144	Dry	Satiety Small Dog	2015-02-27	3	2015-04-04	0	1	-2	0	5.14286	0	147.667	-48	70.302	-22.852	0	0	3	0
1812035	767632	Netherlands	female	neutered	2013-02-27	Chihuahua	3.5	8	2.69	130	Dry	Satiety Small Dog	2015-02-27	4	2015-04-25	1	1	-2	0	8.14286	0	147.667	-48	70.302	-22.852	0	0	3	0
1812035	767632	Netherlands	female	neutered	2013-02-27	Chihuahua	3.3	8	2.69	118	Dry	Satiety Small Dog	2015-02-27	5	2015-05-16	0	0	-2	-0.2	11.1429	-0.512821	147.667	-48	70.302	-22.852	-0.2	-5.71429	3	-1.90476
1812369	767624	Netherlands	female	neutered	2013-02-27	Standaard Schnauzer	45.8	8	38.17	930	Mix feeding	wet product : Satiety Weight Management Canine / dry product : Satiety Support Dry	2015-02-27	1	2015-02-27	0	1	0	0	0	#N/A	890.333	-119	57.978	-7.749	0	0	0
1812369	767624	Netherlands	female	neutered	2013-02-27	Standaard Schnauzer	43.65	8	38.17	930	Mix feeding	wet product : Satiety Weight Management Canine / dry product : Satiety Support Dry	2015-02-27	2	2015-03-13	0	1	0	-2.15	2	-2.34716	890.333	-119	57.978	-7.749	-2.15	-4.69432	2	-2.34716
1812369	767624	Netherlands	female	neutered	2013-02-27	Standaard Schnauzer	40.5	8	38.17	930	Mix feeding	wet product : Satiety Weight Management Canine / dry product : Satiety Weight Management Dry	2015-02-27	3	2015-04-03	1	1	0	-5.3	5	-2.31441	890.333	-119	57.978	-7.749	-3.15	-6.87773	3	-2.29258
1812369	767624	Netherlands	female	neutered	2013-02-27	Standaard Schnauzer	39.5	8	38.17	811	Mix feeding	wet product : Satiety Weight Management Canine / dry product : Satiety Weight Management Dry	2015-02-27	4	2015-04-25	1	0	0	-6.3	8.14286	-1.68927	890.333	-119	57.978	-7.749	-1	-2.18341	3.14286	-0.69472
1812369	767624	Netherlands	female	neutered	2013-02-27	Standaard Schnauzer	37.5	8	38.17	811	Dry	0.5	2015-02-27	5	2015-05-15	1	1	-1	-8.3	11	-1.64748	890.333	-119	57.978	-7.749	-2	-4.36681	2.85714	-1.52838
1812672	1492891	USA	female	neutered	2011-11-22	Dachshund	8.30083	7	6.91735	259	Mix feeding	wet product : Satiety Weight Management Canine / dry product : Satiety Weight Management Dry	2015-02-27	1	2015-02-27	0	0	0	0	0	#N/A	282.333	28	66.192	6.565	0	0	0
1812672	1492891	USA	female	neutered	2011-11-22	Dachshund	7.71115	7	6.91735	287	Mix feeding	wet product : Satiety Weight Management Canine / dry product : Satiety Small Dog	2015-02-27	2	2015-03-13	-1	1	-1	-0.589676	2	-3.55191	282.333	28	66.192	6.565	-0.589676	-7.10383	2	-3.55191
1812672	1492891	USA	female	neutered	2011-11-22	Dachshund	7.71115	7	6.91735	287	Mix feeding	wet product : Satiety Weight Management Canine / dry product : Satiety Small Dog	2015-02-27	3	2015-03-26	-1	0	0	-0.589676	3.85714	-1.84173	282.333	28	66.192	6.565	0	0	1.85714	0
1812672	1492891	USA	female	neutered	2011-11-22	Dachshund	7.25755	7	6.91735	287	Mix feeding	wet product : Satiety Weight Management Canine / dry product : Satiety Weight Management Dry	2015-02-27	4	2015-04-24	0	1	0	-1.04327	8	-1.57104	282.333	28	66.192	6.565	-0.453597	-5.46448	4.14286	-1.31901
1812672	1492891	USA	female	neutered	2011-11-22	Dachshund	6.94003	7	6.91735	287	Mix feeding	wet product : Satiety Weight Management Canine / dry product : Satiety Small Dog	2015-02-27	5	2015-05-20	0	1	-1	-1.36079	11.7143	-1.39944	282.333	28	66.192	6.565	-0.317518	-3.82514	3.71429	-1.02984
1812693	1488111	USA	male	neutered	2008-02-26	Australian Shepherd Dog	18.8696	7	14.5151	524	Dry	Satiety Weight Management Dry	2015-02-28	1	2015-02-28	1	1	-2	0	0	#N/A	436.833	-139	58.742	-18.692	0	0	0
1812693	1488111	USA	male	neutered	2008-02-26	Australian Shepherd Dog	19.6861	7	14.5151	475	Dry	Satiety Weight Management Dry	2015-02-28	2	2015-03-12	1	-1	0	0.816475	1.71429	2.52404	436.833	-139	58.742	-18.692	0.816475	4.32692	1.71429	2.52404
1812693	1488111	USA	male	neutered	2008-02-26	Australian Shepherd Dog	18.5521	7	14.5151	426	Dry	Satiety Weight Management Dry	2015-02-28	3	2015-03-28	0	1	0	-0.317518	4	-0.420673	436.833	-139	58.742	-18.692	-1.13399	-6.00962	2.28571	-2.62921
1812693	1488111	USA	male	neutered	2008-02-26	Australian Shepherd Dog	19.5954	7	14.5151	385	Dry	Satiety Weight Management Dry	2015-02-28	4	2015-04-25	1	1	0	0.725755	8	0.480769	436.833	-139	58.742	-18.692	1.04327	5.52885	4	1.38221
1812693	1488111	USA	male	neutered	2008-02-26	Australian Shepherd Dog	20.3665	7	14.5151	344	Dry	Satiety Weight Management Dry	2015-02-28	5	2015-05-22	0	0	-1	1.49687	11.8571	0.669022	436.833	-139	58.742	-18.692	0.771115	4.08654	3.85714	1.05947
1814148	1502313	USA	female	neutered	2008-03-02	Giant	65.318	8	54.4316	1213	Dry	Satiety Weight Management Dry	2015-03-02	1	2015-03-02	-1	-1	-1	0	0	#N/A	1176.33	-110	58.701	-5.489	0	0	0
1814148	1502313	USA	female	neutered	2008-03-02	Giant	62.8685	8	54.4316	1213	Dry	Satiety Weight Management Dry	2015-03-02	2	2015-03-16	0	1	-1	-2.44942	2	-1.875	1176.33	-110	58.701	-5.489	-2.44942	-3.75	2	-1.875
1814148	1502313	USA	female	neutered	2008-03-02	Giant	62.5964	8	54.4316	1213	Dry	Satiety Weight Management Dry	2015-03-02	3	2015-03-30	0	1	-2	-2.72158	4	-1.04167	1176.33	-110	58.701	-5.489	-0.272158	-0.416667	2	-0.208333
1814148	1502313	USA	female	neutered	2008-03-02	Giant	60.5552	8	54.4316	1103	Mix feeding	wet product : Satiety Weight Management Canine / dry product : Satiety Weight Management Dry	2015-03-02	4	2015-04-27	0	0	0	-4.76277	8	-0.911458	1176.33	-110	58.701	-5.489	-2.04119	-3.125	4	-0.78125
1814148	1502313	USA	female	neutered	2008-03-02	Giant	57.6068	8	54.4316	992	Mix feeding	wet product : Satiety Weight Management Canine / dry product : Satiety Weight Management Dry	2015-03-02	5	2015-05-26	0	0	0	-7.71115	12.1429	-0.972222	1176.33	-110	58.701	-5.489	-2.94838	-4.51389	4.14286	-1.08956
1814205	1502313	USA	female	neutered	2013-02-28	Beagle	24.2674	8	18.6655	544	Dry	Satiety Weight Management Dry	2015-03-06	1	2015-03-06	0	1	-3	0	0	#N/A	#N/A	-99	#N/A	-11.024	0	0	0
1814205	1502313	USA	female	neutered	2013-02-28	Beagle	24.0406	8	18.6655	494	Mix feeding	wet product : Satiety Weight Management Canine / dry product : Satiety Weight Management Dry	2015-03-06	2	2015-03-20	1	1	0	-0.226799	2	-0.46729	#N/A	-99	#N/A	-11.024	-0.226799	-0.934579	2	-0.46729
1814205	1502313	USA	female	neutered	2013-02-28	Beagle	#N/A	8	18.6655	#N/A			2015-03-06	3	2015-04-03	1	1	-1	#N/A	4	#N/A	#N/A	-99	#N/A	-11.024	#N/A	#N/A	2
1814205	1502313	USA	female	neutered	2013-02-28	Beagle	22.3623	8	18.6655	445	Mix feeding	wet product : Satiety Weight Management Canine / dry product : Satiety Weight Management Dry	2015-03-06	4	2015-05-01	0	0	-1	-1.90511	8	-0.981308	#N/A	-99	#N/A	-11.024	#N/A	#N/A	4
1814205	1502313	USA	female	neutered	2013-02-28	Beagle	21.3191	8	18.6655	445	Mix feeding	wet product : Satiety Weight Management Canine / dry product : Satiety Weight Management Dry	2015-03-06	5	2015-05-29	1	1	0	-2.94838	12	-1.01246	#N/A	-99	#N/A	-11.024	-1.04327	-4.29907	4	-1.07477
1814211	1502313	USA	female	neutered	2010-03-02	X-SMALL	6.305	8	5.25265	210	Dry	Satiety Small Dog	2015-03-06	1	2015-03-06	1	1	-2	0	0	#N/A	229.167	23	66.049	6.629	0	0	0
1814211	1502313	USA	female	neutered	2010-03-02	X-SMALL	5.80604	8	5.25265	233	Dry	Satiety Small Dog	2015-03-06	2	2015-03-20	1	1	-2	-0.498957	2	-3.95683	229.167	23	66.049	6.629	-0.498957	-7.91367	2	-3.95683
1814211	1502313	USA	female	neutered	2010-03-02	X-SMALL	5.71532	8	5.25265	233	Dry	Satiety Small Dog	2015-03-06	3	2015-04-03	1	1	-1	-0.589676	4	-2.33813	229.167	23	66.049	6.629	-0.0907194	-1.43885	2	-0.719424
1814211	1502313	USA	female	neutered	2010-03-02	X-SMALL	5.48852	8	5.25265	233	Dry	Satiety Small Dog	2015-03-06	4	2015-04-30	1	1	-2	-0.816475	7.85714	-1.64814	229.167	23	66.049	6.629	-0.226799	-3.59712	3.85714	-0.932587
1814211	1502313	USA	female	neutered	2010-03-02	X-SMALL	5.30709	8	5.25265	233	Dry	Satiety Small Dog	2015-03-06	5	2015-05-28	0	0	-2	-0.997913	11.8571	-1.33484	229.167	23	66.049	6.629	-0.181439	-2.8777	4	-0.719424
1814213	1502313	USA	female	neutered	2008-03-02	MINI	7.75651	7	6.46376	246	Dry	Satiety Small Dog	2015-03-06	1	2015-03-06	1	1	-2	0	0	#N/A	268.5	27	66.234	6.66	0	0	0
1814213	1502313	USA	female	neutered	2008-03-02	MINI	7.16683	7	6.46376	273	Dry	Satiety Small Dog	2015-03-06	2	2015-03-20	1	1	-2	-0.589676	2	-3.80117	268.5	27	66.234	6.66	-0.589676	-7.60234	2	-3.80117
1814213	1502313	USA	female	neutered	2008-03-02	MINI	6.89467	7	6.46376	273	Dry	Satiety Small Dog	2015-03-06	3	2015-04-03	1	1	-1	-0.861834	4	-2.77778	268.5	27	66.234	6.66	-0.272158	-3.50877	2	-1.75439
1814213	1502313	USA	female	neutered	2008-03-02	MINI	6.39572	7	6.46376	273	Dry	Satiety Small Dog	2015-03-06	4	2015-04-30	0	0	-2	-1.36079	7.85714	-2.23285	268.5	27	66.234	6.66	-0.498957	-6.43275	3.85714	-1.66775
1814213	1502313	USA	female	neutered	2008-03-02	MINI	6.71324	7	6.46376	273	Dry	Satiety Small Dog	2015-03-06	5	2015-05-28	1	1	-2	-1.04327	11.8571	-1.13436	268.5	27	66.234	6.66	0.317518	4.09357	4	1.02339
1814228	1502313	USA	female	neutered	2010-03-02	Golden Retriever	39.4629	8	32.8858	831	Dry	Satiety Weight Management Dry	2015-03-05	1	2015-03-05	0	1	-3	0	0	#N/A	781	-75	56.872	-5.461	0	0	0
1814228	1502313	USA	female	neutered	2010-03-02	Golden Retriever	38.4197	8	32.8858	831	Dry	Satiety Weight Management Dry	2015-03-05	2	2015-03-20	0	0	-1	-1.04327	2.14286	-1.23372	781	-75	56.872	-5.461	-1.04327	-2.64368	2.14286	-1.23372
1814228	1502313	USA	female	neutered	2010-03-02	Golden Retriever	37.9207	8	32.8858	756	Dry	Satiety Weight Management Dry	2015-03-05	3	2015-04-03	0	1	-1	-1.54223	4.14286	-0.943321	781	-75	56.872	-5.461	-0.498957	-1.26437	2	-0.632184
1814228	1502313	USA	female	neutered	2010-03-02	Golden Retriever	35.9249	8	32.8858	756	Dry	Satiety Weight Management Dry	2015-03-05	4	2015-05-01	0	0	-1	-3.53806	8.14286	-1.10103	781	-75	56.872	-5.461	-1.99583	-5.05747	4	-1.26437
1814228	1502313	USA	female	neutered	2010-03-02	Golden Retriever	33.9291	8	32.8858	756	Dry	Satiety Weight Management Dry	2015-03-05	5	2015-05-29	0	0	-1	-5.53388	12.1429	-1.15483	781	-75	56.872	-5.461	-1.99583	-5.05747	4	-1.26437
1814406	1429140	Spain	male	intact	2007-11-28	Labrador Retriever	39.8	8	30.62	1046	Dry	Satiety Weight Management Dry	2015-03-03	1	2015-03-03	-1	0	-1	0	0	#N/A	945.667	-201	72.65	-15.442	0	0	0
1814406	1429140	Spain	male	intact	2007-11-28	Labrador Retriever	38.5	8	30.62	1046	Dry	Satiety Weight Management Dry	2015-03-03	2	2015-03-18	0	0	-1	-1.3	2.14286	-1.52429	945.667	-201	72.65	-15.442	-1.3	-3.26633	2.14286	-1.52429
1814406	1429140	Spain	male	intact	2007-11-28	Labrador Retriever	38.2	8	30.62	946	Dry	Satiety Weight Management Dry	2015-03-03	3	2015-04-01	0	0	-2	-1.6	4.14286	-0.970369	945.667	-201	72.65	-15.442	-0.3	-0.753769	2	-0.376884
1814406	1429140	Spain	male	intact	2007-11-28	Labrador Retriever	37.8	8	30.62	845	Dry	Satiety Weight Management Dry	2015-03-03	4	2015-04-15	0	0	-1	-2	6.14286	-0.818044	945.667	-201	72.65	-15.442	-0.4	-1.00503	2	-0.502513
1814406	1429140	Spain	male	intact	2007-11-28	Labrador Retriever	36.3	8	30.62	759	Dry	Satiety Weight Management Dry	2015-03-03	5	2015-05-16	0	0	-1	-3.5	10.5714	-0.831862	945.667	-201	72.65	-15.442	-1.5	-3.76884	4.42857	-0.851029
1814732	1501874	Portugal	female	neutered	2002-08-25	Labrador Retriever	49.9	8	38.38	933	Dry	Satiety Weight Management Dry	2015-03-03	1	2015-03-03	0	0	0	0	0	#N/A	877	-84	56.875	-5.448	0	0	0
1814732	1501874	Portugal	female	neutered	2002-08-25	Labrador Retriever	48.8	8	38.38	933	Dry	Satiety Weight Management Dry	2015-03-03	2	2015-03-17	0	0	0	-1.1	2	-1.1022	877	-84	56.875	-5.448	-1.1	-2.20441	2	-1.1022
1814732	1501874	Portugal	female	neutered	2002-08-25	Labrador Retriever	48.1	8	38.38	849	Dry	Satiety Weight Management Dry	2015-03-03	3	2015-03-31	0	0	-1	-1.8	4	-0.901804	877	-84	56.875	-5.448	-0.7	-1.40281	2	-0.701403
1814732	1501874	Portugal	female	neutered	2002-08-25	Labrador Retriever	46.75	8	38.38	849	Dry	Satiety Weight Management Dry	2015-03-03	4	2015-04-16	0	0	-2	-3.15	6.28571	-1.00428	877	-84	56.875	-5.448	-1.35	-2.70541	2.28571	-1.18362
1814732	1501874	Portugal	female	neutered	2002-08-25	Labrador Retriever	45.45	8	38.38	764	Dry	Satiety Weight Management Dry	2015-03-03	5	2015-05-27	0	0	-1	-4.45	12.1429	-0.73441	877	-84	56.875	-5.448	-1.3	-2.60521	5.85714	-0.444792
1815646	1438844	Spain	female	neutered	2003-03-03	Jack Russell Terrier	7.4	8	6.17	237	Dry	Satiety Small Dog	2015-03-03	1	2015-03-03	1	1	-2	0	0	#N/A	237	0	60.539	0	0	0	0
1815646	1438844	Spain	female	neutered	2003-03-03	Jack Russell Terrier	7.1	8	6.17	237	Dry	Satiety Small Dog	2015-03-03	2	2015-03-20	1	1	-2	-0.3	2.42857	-1.66932	237	0	60.539	0	-0.3	-4.05405	2.42857	-1.66932
1815646	1438844	Spain	female	neutered	2003-03-03	Jack Russell Terrier	6.6	8	6.17	237	Dry	Satiety Small Dog	2015-03-03	3	2015-04-13	1	1	-1	-0.8	5.85714	-1.84575	237	0	60.539	0	-0.5	-6.75676	3.42857	-1.97072
1815646	1438844	Spain	female	neutered	2003-03-03	Jack Russell Terrier	6.35	8	6.17	237	Dry	Satiety Small Dog	2015-03-03	4	2015-05-04	1	1	-1	-1.05	8.85714	-1.60201	237	0	60.539	0	-0.25	-3.37838	3	-1.12613
1815646	1438844	Spain	female	neutered	2003-03-03	Jack Russell Terrier	6.1	8	6.17	237	Dry	Satiety Small Dog	2015-03-03	5	2015-06-02	0	0	-1	-1.3	13	-1.35135	237	0	60.539	0	-0.25	-3.37838	4.14286	-0.815471
1815679	1486092	USA	female	neutered	2009-02-25	American Staffordshire Terrier	31.7518	7	26.4583	706	Dry	Satiety Weight Management Dry	2015-03-06	1	2015-03-06	0	0	0	0	0	#N/A	582.167	-192	49.903	-16.458	0	0	0
1815679	1486092	USA	female	neutered	2009-02-25	American Staffordshire Terrier	32.7951	7	26.4583	629	Dry	Satiety Weight Management Dry	2015-03-06	2	2015-03-21	1	1	0	1.04327	2.14286	1.53333	582.167	-192	49.903	-16.458	1.04327	3.28571	2.14286	1.53333
1815679	1486092	USA	female	neutered	2009-02-25	American Staffordshire Terrier	31.8425	7	26.4583	565	Dry	Satiety Weight Management Dry	2015-03-06	3	2015-04-04	0	1	0	0.0907194	4.14286	0.0689655	582.167	-192	49.903	-16.458	-0.952554	-3	2	-1.5
1815679	1486092	USA	female	neutered	2009-02-25	American Staffordshire Terrier	30.4817	7	26.4583	514	Dry	Satiety Weight Management Dry	2015-03-06	4	2015-05-02	1	1	0	-1.27007	8.14286	-0.491228	582.167	-192	49.903	-16.458	-1.36079	-4.28571	4	-1.07143
1815679	1486092	USA	female	neutered	2009-02-25	American Staffordshire Terrier	30.5271	7	26.4583	462	Dry	Satiety Weight Management Dry	2015-03-06	5	2015-06-06	1	1	0	-1.22471	13.1429	-0.293478	582.167	-192	49.903	-16.458	0.0453597	0.142857	5	0.0285714
1815993	1214285	Italy	female	neutered	2007-03-04	MINI	10.7	8	8.23	294	Mix feeding	wet product : Satiety Weight Management Canine / dry product : Satiety Small Dog	2015-03-04	1	2015-03-04	0	0	-2	0	0	#N/A	294	0	60.506	0	0	0	0
1815993	1214285	Italy	female	neutered	2007-03-04	MINI	10.4	8	8.23	294	Mix feeding	wet product : Satiety Weight Management Canine / dry product : Satiety Small Dog	2015-03-04	2	2015-03-20	0	0	-2	-0.3	2.28571	-1.22664	294	0	60.506	0	-0.3	-2.80374	2.28571	-1.22664
1815993	1214285	Italy	female	neutered	2007-03-04	MINI	10	8	8.23	294	Mix feeding	wet product : Satiety Weight Management Canine / dry product : Satiety Small Dog	2015-03-04	3	2015-04-03	1	1	-1	-0.7	4.28571	-1.52648	294	0	60.506	0	-0.4	-3.73832	2	-1.86916
1815993	1214285	Italy	female	neutered	2007-03-04	MINI	9.5	8	8.23	294	Mix feeding	wet product : Satiety Weight Management Canine / dry product : Satiety Small Dog	2015-03-04	4	2015-05-04	0	0	-2	-1.2	8.71429	-1.28696	294	0	60.506	0	-0.5	-4.6729	4.42857	-1.05517
1815993	1214285	Italy	female	neutered	2007-03-04	MINI	9	8	8.23	294	Mix feeding	wet product : Satiety Weight Management Canine / dry product : Satiety Small Dog	2015-03-04	5	2015-06-10	0	0	-1	-1.7	14	-1.13485	294	0	60.506	0	-0.5	-4.6729	5.28571	-0.884062
1816050	1214285	Italy	female	intact	2004-03-16	MINI	11.5	8	8.21	342	Mix feeding	wet product : Satiety Weight Management Canine / dry product : Satiety Small Dog	2015-03-04	1	2015-03-04	-1	-1	-2	0	0	#N/A	342	0	70.513	0	0	0	0
1816050	1214285	Italy	female	intact	2004-03-16	MINI	10.8	8	8.21	342	Mix feeding	wet product : Satiety Weight Management Canine / dry product : Satiety Small Dog	2015-03-04	2	2015-03-20	0	0	-2	-0.7	2.28571	-2.66304	342	0	70.513	0	-0.7	-6.08696	2.28571	-2.66304
1816050	1214285	Italy	female	intact	2004-03-16	MINI	10.2	8	8.21	342	Mix feeding	wet product : Satiety Weight Management Canine / dry product : Satiety Small Dog	2015-03-04	3	2015-04-03	0	0	0	-1.3	4.28571	-2.63768	342	0	70.513	0	-0.6	-5.21739	2	-2.6087
1816050	1214285	Italy	female	intact	2004-03-16	MINI	9.7	8	8.21	342	Mix feeding	wet product : Satiety Weight Management Canine / dry product : Satiety Small Dog	2015-03-04	4	2015-04-24	-1	-1	-3	-1.8	7.28571	-2.14834	342	0	70.513	0	-0.5	-4.34783	3	-1.44928
1816050	1214285	Italy	female	intact	2004-03-16	MINI	9.1	8	8.21	342	Mix feeding	wet product : Satiety Weight Management Canine / dry product : Satiety Small Dog	2015-03-04	5	2015-06-10	0	0	-1	-2.4	14	-1.49068	342	0	70.513	0	-0.6	-5.21739	6.71429	-0.777058
1816629	1491877	USA	male	neutered	2007-10-17	Cocker Spaniel	11.975	9	9.97913	396	Dry	Satiety Weight Management Dry	2015-03-04	1	2015-03-04	0	0	-2	0	0	#N/A	396	0	70.53	0	0	0	0
1816629	1491877	USA	male	neutered	2007-10-17	Cocker Spaniel	11.4306	9	9.97913	396	Dry	Satiety Weight Management Dry	2015-03-04	2	2015-03-24	0	0	-2	-0.544316	2.85714	-1.59091	396	0	70.53	0	-0.544316	-4.54545	2.85714	-1.59091
1816629	1491877	USA	male	neutered	2007-10-17	Cocker Spaniel	10.7049	9	9.97913	396	Dry	Satiety Weight Management Dry	2015-03-04	3	2015-04-06	1	1	-2	-1.27007	4.71429	-2.24977	396	0	70.53	0	-0.725755	-6.06061	1.85714	-3.2634
1816629	1491877	USA	male	neutered	2007-10-17	Cocker Spaniel	10.8863	9	9.97913	396	Dry	Satiety Weight Management Dry	2015-03-04	4	2015-05-02	1	1	0	-1.08863	8.42857	-1.07858	396	0	70.53	0	0.181439	1.51515	3.71429	0.407925
1816629	1491877	USA	male	neutered	2007-10-17	Cocker Spaniel	10.5688	9	9.97913	359	Dry	Satiety Weight Management Dry	2015-03-04	5	2015-05-29	1	1	0	-1.40615	12.2857	-0.955779	396	0	70.53	0	-0.317518	-2.65152	3.85714	-0.68743
1816656	1491877	USA	female	neutered	2012-12-17	Yorkshire Terrier	4.76277	7	3.62878	160	Dry	Satiety Small Dog	2015-03-04	1	2015-03-04	0	0	-3	0	0	#N/A	155	0	58.954	0	0	0	0
1816656	1491877	USA	female	neutered	2012-12-17	Yorkshire Terrier	4.35453	7	3.62878	160	Dry	Satiety Small Dog	2015-03-04	2	2015-03-21	-1	-1	0	-0.408237	2.42857	-3.52941	155	0	58.954	0	-0.408237	-8.57143	2.42857	-3.52941
1816656	1491877	USA	female	neutered	2012-12-17	Yorkshire Terrier	4.39989	7	3.62878	145	Dry	Satiety Small Dog	2015-03-04	3	2015-04-04	0	1	0	-0.362878	4.42857	-1.72043	155	0	58.954	0	0.0453597	0.952381	2	0.47619
1816656	1491877	USA	female	neutered	2012-12-17	Yorkshire Terrier	4.35453	7	3.62878	160	Dry	Satiety Small Dog	2015-03-04	4	2015-04-25	1	1	-1	-0.408237	7.42857	-1.15385	155	0	58.954	0	-0.0453597	-0.952381	3	-0.31746
1816656	1491877	USA	female	neutered	2012-12-17	Yorkshire Terrier	4.17309	7	3.62878	145	Dry	Satiety Small Dog	2015-03-04	5	2015-05-19	1	1	-1	-0.589676	10.8571	-1.14035	155	0	58.954	0	-0.181439	-3.80952	3.42857	-1.11111
1816665	1491877	USA	female	neutered	2008-06-25	Chihuahua	11.2038	7	8.48226	301	Dry	Satiety Weight Management Dry	2015-03-04	1	2015-03-04	0	0	-2	0	0	#N/A	274	-54	55.127	-10.865	0	0	0
1816665	1491877	USA	female	neutered	2008-06-25	Chihuahua	10.9317	7	8.48226	301	Dry	Satiety Weight Management Dry	2015-03-04	2	2015-03-17	0	1	-2	-0.272158	1.85714	-1.308	274	-54	55.127	-10.865	-0.272158	-2.42915	1.85714	-1.308
1816665	1491877	USA	female	neutered	2008-06-25	Chihuahua	10.7956	7	8.48226	274	Dry	Satiety Weight Management Dry	2015-03-04	3	2015-03-31	0	1	-2	-0.408237	3.85714	-0.944669	274	-54	55.127	-10.865	-0.136079	-1.21457	2	-0.607287
1816665	1491877	USA	female	neutered	2008-06-25	Chihuahua	10.5235	7	8.48226	247	Dry	Satiety Weight Management Dry	2015-03-04	4	2015-04-23	0	1	-2	-0.680396	7.14286	-0.850202	274	-54	55.127	-10.865	-0.272158	-2.42915	3.28571	-0.739306
1816665	1491877	USA	female	neutered	2008-06-25	Chihuahua	10.8863	7	8.48226	225	Dry	Satiety Weight Management Dry	2015-03-04	5	2015-05-19	0	1	-2	-0.317518	10.8571	-0.261027	274	-54	55.127	-10.865	0.362878	3.23887	3.71429	0.872002
1816715	1488111	USA	male	neutered	2008-03-04	Boston Terrier	10.2967	7	8.58206	353	Dry	Satiety Weight Management Dry	2015-03-05	1	2015-03-05	0	1	-1	0	0	#N/A	320	-66	63.82	-13.163	0	0	0
1816715	1488111	USA	male	neutered	2008-03-04	Boston Terrier	10.0699	7	8.58206	353	Dry	Satiety Weight Management Dry	2015-03-05	2	2015-03-19	1	1	-1	-0.226799	2	-1.10132	320	-66	63.82	-13.163	-0.226799	-2.20264	2	-1.10132
1816715	1488111	USA	male	neutered	2008-03-04	Boston Terrier	10.2059	7	8.58206	320	Dry	Satiety Weight Management Dry	2015-03-05	3	2015-04-02	1	1	-1	-0.0907194	4	-0.220264	320	-66	63.82	-13.163	0.136079	1.32159	2	0.660793
1816715	1488111	USA	male	neutered	2008-03-04	Boston Terrier	9.7977	7	8.58206	287	Dry	Satiety Weight Management Dry	2015-03-05	4	2015-04-30	1	1	-1	-0.498957	8	-0.605727	320	-66	63.82	-13.163	-0.408237	-3.96476	4	-0.991189
1816715	1488111	USA	male	neutered	2008-03-04	Boston Terrier	9.43482	7	8.58206	260	Dry	Satiety Weight Management Dry	2015-03-05	5	2015-05-28	1	1	-1	-0.861834	12	-0.697504	320	-66	63.82	-13.163	-0.362878	-3.52423	4	-0.881057
1816724	1488111	USA	male	neutered	2006-03-04	Bichon Frise	7.34827	8	6.12356	275	Dry	Satiety Weight Management Dry	2015-03-05	1	2015-03-05	-1	0	-2	0	0	#N/A	249	-52	63.966	-13.358	0	0	0
1816724	1488111	USA	male	neutered	2006-03-04	Bichon Frise	7.48435	8	6.12356	275	Dry	Satiety Weight Management Dry	2015-03-05	2	2015-03-19	-1	0	-1	0.136079	2	0.925926	249	-52	63.966	-13.358	0.136079	1.85185	2	0.925926
1816724	1488111	USA	male	neutered	2006-03-04	Bichon Frise	7.39363	8	6.12356	249	Dry	Satiety Weight Management Dry	2015-03-05	3	2015-04-02	-1	0	-2	0.0453597	4	0.154321	249	-52	63.966	-13.358	-0.0907194	-1.23457	2	-0.617284
1816724	1488111	USA	male	neutered	2006-03-04	Bichon Frise	7.30291	8	6.12356	223	Dry	Satiety Weight Management Dry	2015-03-05	4	2015-04-30	-1	-1	-2	-0.0453597	8	-0.0771605	249	-52	63.966	-13.358	-0.0907194	-1.23457	4	-0.308642
1816724	1488111	USA	male	neutered	2006-03-04	Bichon Frise	7.16683	8	6.12356	202	Dry	Satiety Weight Management Dry	2015-03-05	5	2015-05-28	1	1	-2	-0.181439	12	-0.205761	249	-52	63.966	-13.358	-0.136079	-1.85185	4	-0.462963
1816807	1072165	Denmark	male	neutered	2008-03-17	Tibetansk Spaniel	9.7	9	7.46	318	Dry	Satiety Small Dog - overvÃ¦gtsdiÃ¦t	2015-03-05	1	2015-03-05	0	0	-2	0	0	#N/A	245.5	-94	54.387	-20.824	0	0	0
1816807	1072165	Denmark	male	neutered	2008-03-17	Tibetansk Spaniel	9.7	9	7.46	259	Dry	Satiety Small Dog - overvÃ¦gtsdiÃ¦t	2015-03-05	2	2015-03-19	0	0	-2	0	2	0	245.5	-94	54.387	-20.824	0	0	2	0
1816807	1072165	Denmark	male	neutered	2008-03-17	Tibetansk Spaniel	9.6	9	7.46	224	Mix feeding	wet product : Satiety Weight Management - overvÃ¦gtsdiÃ¦t, vÃ¥dfoder / dry product : Satiety Weight Management - overvÃ¦gtsdiÃ¦t	2015-03-05	3	2015-03-31	0	0	-2	-0.1	3.71429	-0.277557	245.5	-94	54.387	-20.824	-0.1	-1.03093	1.71429	-0.601375
1816807	1072165	Denmark	male	neutered	2008-03-17	Tibetansk Spaniel	8.7	9	7.46	224	Mix feeding	wet product : Satiety Weight Management - overvÃ¦gtsdiÃ¦t, vÃ¥dfoder / dry product : Satiety Weight Management - overvÃ¦gtsdiÃ¦t	2015-03-05	4	2015-05-07	0	0	-2	-1	9	-1.14548	245.5	-94	54.387	-20.824	-0.9	-9.27835	5.28571	-1.75536
1816807	1072165	Denmark	male	neutered	2008-03-17	Tibetansk Spaniel	8.7	9	7.46	204	Mix feeding	wet product : Satiety Weight Management - overvÃ¦gtsdiÃ¦t, vÃ¥dfoder / dry product : Satiety Weight Management - overvÃ¦gtsdiÃ¦t	2015-03-05	5	2015-06-04	0	0	-2	-1	13	-0.793021	245.5	-94	54.387	-20.824	0	0	4	0
1817148	1253694	Italy	female	neutered	2013-05-05	Staffordshire Bull Terrier	38.8	8	29.85	773	Dry	Satiety Weight Management Dry	2015-03-31	1	2015-03-05	0	1	-3	0	0	#N/A	773	0	60.53	0	0	0	0
1817148	1253694	Italy	female	neutered	2013-05-05	Staffordshire Bull Terrier	38.8	8	29.85	773	Dry	Satiety Weight Management Dry	2015-03-31	2	2015-03-31	0	1	-3	0	3.71429	0	773	0	60.53	0	0	0	3.71429	0
1817148	1253694	Italy	female	neutered	2013-05-05	Staffordshire Bull Terrier	37.9	8	29.85	773	Dry	Satiety Weight Management Dry	2015-03-31	3	2015-04-16	0	1	-1	-0.9	6	-0.386598	773	0	60.53	0	-0.9	-2.31959	2.28571	-1.01482
1817148	1253694	Italy	female	neutered	2013-05-05	Staffordshire Bull Terrier	35.2	8	29.85	773	Dry	Satiety Weight Management Dry	2015-03-31	4	2015-04-30	0	1	0	-3.6	8	-1.15979	773	0	60.53	0	-2.7	-6.95876	2	-3.47938
1817148	1253694	Italy	female	neutered	2013-05-05	Staffordshire Bull Terrier	33.2	8	29.85	773	Dry	Satiety Weight Management Dry	2015-03-31	5	2015-05-30	0	1	-1	-5.6	12.2857	-1.17478	773	0	60.53	0	-2	-5.15464	4.28571	-1.20275
1817160	1253694	Italy	male	neutered	2011-04-20	Spinone	31	8	25.83	807	Dry	Satiety Weight Management Dry	2015-03-05	1	2015-03-05	0	1	-1	0	0	#N/A	693.667	-151	60.542	-13.179	0	0	0
1817160	1253694	Italy	male	neutered	2011-04-20	Spinone	30.7	8	25.83	731	Dry	Satiety Weight Management Dry	2015-03-05	2	2015-03-19	0	-1	-1	-0.3	2	-0.483871	693.667	-151	60.542	-13.179	-0.3	-0.967742	2	-0.483871
1817160	1253694	Italy	male	neutered	2011-04-20	Spinone	30	8	25.83	656	Dry	Satiety Weight Management Dry	2015-03-05	3	2015-04-04	0	0	-1	-1	4.28571	-0.752688	693.667	-151	60.542	-13.179	-0.7	-2.25806	2.28571	-0.987903
1817160	1253694	Italy	male	neutered	2011-04-20	Spinone	27.7	8	25.83	656	Dry	Satiety Weight Management Dry	2015-03-05	4	2015-05-05	0	1	-1	-3.3	8.71429	-1.22158	693.667	-151	60.542	-13.179	-2.3	-7.41935	4.42857	-1.67534
1817160	1253694	Italy	male	neutered	2011-04-20	Spinone	26.3	8	25.83	656	Dry	Satiety Weight Management Dry	2015-03-05	5	2015-06-06	0	1	-1	-4.7	13.2857	-1.14117	693.667	-151	60.542	-13.179	-1.4	-4.51613	4.57143	-0.987903
1817474	1491877	USA	male	neutered	2006-11-11	Jack Russell Terrier	7.52971	7	5.76068	262	Dry	Satiety Small Dog	2015-03-05	1	2015-03-05	-1	-1	0	0	0	#N/A	237.667	-49	63.916	-13.178	0	0	0
1817474	1491877	USA	male	neutered	2006-11-11	Jack Russell Terrier	7.30291	7	5.76068	262	Dry	Satiety Small Dog	2015-03-05	2	2015-03-17	-1	-1	0	-0.226799	1.71429	-1.75703	237.667	-49	63.916	-13.178	-0.226799	-3.01205	1.71429	-1.75703
1817474	1491877	USA	male	neutered	2006-11-11	Jack Russell Terrier	7.43899	7	5.76068	238	Dry	Satiety Small Dog	2015-03-05	3	2015-03-31	0	-1	-2	-0.0907194	3.71429	-0.324374	237.667	-49	63.916	-13.178	0.136079	1.80723	2	0.903614
1817474	1491877	USA	male	neutered	2006-11-11	Jack Russell Terrier	7.34827	7	5.76068	213	Dry	Satiety Small Dog	2015-03-05	4	2015-04-23	0	0	0	-0.181439	7	-0.344234	237.667	-49	63.916	-13.178	-0.0907194	-1.20482	3.28571	-0.366684
1817474	1491877	USA	male	neutered	2006-11-11	Jack Russell Terrier	7.30291	7	5.76068	193	Dry	Satiety Small Dog	2015-03-05	5	2015-05-19	0	0	0	-0.226799	10.7143	-0.281124	237.667	-49	63.916	-13.178	-0.0453597	-0.60241	3.71429	-0.162187
1817513	1491877	USA	male	neutered	2012-08-25	Golden Retriever	26.5808	8	19.9583	665	Dry	Satiety Weight Management Dry	2015-03-06	1	2015-03-06	1	1	-1	0	0	#N/A	554.667	-176	58.741	-18.639	0	0	0
1817513	1491877	USA	male	neutered	2012-08-25	Golden Retriever	26.1725	8	19.9583	603	Dry	Satiety Weight Management Dry	2015-03-06	2	2015-03-24	1	1	-2	-0.408237	2.57143	-0.59727	554.667	-176	58.741	-18.639	-0.408237	-1.53584	2.57143	-0.59727
1817513	1491877	USA	male	neutered	2012-08-25	Golden Retriever	26.2179	8	19.9583	541	Dry	Satiety Weight Management Dry	2015-03-06	3	2015-04-06	1	-1	-1	-0.362878	4.42857	-0.308268	554.667	-176	58.741	-18.639	0.0453597	0.170648	1.85714	0.0918876
1817513	1491877	USA	male	neutered	2012-08-25	Golden Retriever	25.6282	8	19.9583	489	Dry	Satiety Weight Management Dry	2015-03-06	4	2015-05-13	1	-1	-1	-0.952554	9.71429	-0.368902	554.667	-176	58.741	-18.639	-0.589676	-2.21843	5.28571	-0.419703
1817513	1491877	USA	male	neutered	2012-08-25	Golden Retriever	24.585	8	19.9583	437	Dry	Satiety Weight Management Dry	2015-03-06	5	2015-05-27	1	1	0	-1.99583	11.7143	-0.640972	554.667	-176	58.741	-18.639	-1.04327	-3.92491	2	-1.96246
1817637	1507153	Germany	female	neutered	2003-11-08	Labrador	39	8	32.5	824	Dry	Satiety Weight Management Dry	2015-04-01	1	2015-04-01	-1	-1	-3	0	0	#N/A	691.5	-210	50.802	-15.428	0	0	0
1817637	1507153	Germany	female	neutered	2003-11-08	Labrador	40.4	8	32.5	749	Dry	Satiety Weight Management Dry	2015-04-01	2	2015-04-13	-1	0	-2	1.4	1.71429	2.09402	691.5	-210	50.802	-15.428	1.4	3.58974	1.71429	2.09402
1817637	1507153	Germany	female	neutered	2003-11-08	Labrador	38.2	8	32.5	674	Dry	Satiety Weight Management Dry	2015-04-01	3	2015-04-27	-1	0	-1	-0.8	3.71429	-0.552268	691.5	-210	50.802	-15.428	-2.2	-5.64103	2	-2.82051
1817637	1507153	Germany	female	neutered	2003-11-08	Labrador	37.5	8	32.5	614	Dry	Satiety Small Dog	2015-04-01	4	2015-05-21	0	1	-2	-1.5	7.14286	-0.538462	691.5	-210	50.802	-15.428	-0.7	-1.79487	3.42857	-0.523504
1817637	1507153	Germany	female	neutered	2003-11-08	Labrador	36.4	8	32.5	554	Dry	Satiety Weight Management Dry	2015-04-01	5	2015-06-12	1	0	-2	-2.6	10.2857	-0.648148	691.5	-210	50.802	-15.428	-1.1	-2.82051	3.14286	-0.897436
1818283	1504877	USA	female	neutered	2006-01-16	Medium	13.109	8	10.9226	364	Dry	Satiety Weight Management Dry	2015-03-07	1	2015-03-07	0	1	0	0	0	#N/A	353	-33	58.753	-5.492	0	0	0
1818283	1504877	USA	female	neutered	2006-01-16	Medium	12.6554	8	10.9226	364	Dry	Satiety Weight Management Dry	2015-03-07	2	2015-03-20	0	1	0	-0.453597	1.85714	-1.86319	353	-33	58.753	-5.492	-0.453597	-3.46021	1.85714	-1.86319
1818283	1504877	USA	female	neutered	2006-01-16	Medium	12.3832	8	10.9226	364	Dry	Satiety Weight Management Dry	2015-03-07	3	2015-04-04	0	1	0	-0.725755	4	-1.38408	353	-33	58.753	-5.492	-0.272158	-2.07612	2.14286	-0.968858
1818283	1504877	USA	female	neutered	2006-01-16	Medium	12.2471	8	10.9226	331	Dry	Satiety Weight Management Dry	2015-03-07	4	2015-04-30	0	1	0	-0.861834	7.71429	-0.852236	353	-33	58.753	-5.492	-0.136079	-1.03806	3.71429	-0.279478
1818283	1504877	USA	female	neutered	2006-01-16	Medium	12.0657	8	10.9226	298	Dry	Satiety Weight Management Dry	2015-03-07	5	2015-05-30	0	1	0	-1.04327	12	-0.663206	353	-33	58.753	-5.492	-0.181439	-1.38408	4.28571	-0.322953
1818499	767632	Netherlands	female	neutered	2005-02-05	Hollandse Herder	26.5	7	22.08	617	Dry	Satiety Support Dry	2015-03-07	1	2015-03-07	1	0	-3	0	0	#N/A	617	0	60.574	0	0	0	0
1818499	767632	Netherlands	female	neutered	2005-02-05	Hollandse Herder	25.2	7	22.08	617	Dry	Satiety Weight Management Dry	2015-03-07	2	2015-03-21	1	1	-1	-1.3	2	-2.45283	617	0	60.574	0	-1.3	-4.90566	2	-2.45283
1818499	767632	Netherlands	female	neutered	2005-02-05	Hollandse Herder	24.3	7	22.08	617	Dry	Satiety Weight Management Dry	2015-03-07	3	2015-04-11	1	1	0	-2.2	5	-1.66038	617	0	60.574	0	-0.9	-3.39623	3	-1.13208
1818499	767632	Netherlands	female	neutered	2005-02-05	Hollandse Herder	23.4	7	22.08	617	Dry	Satiety Weight Management Dry	2015-03-07	4	2015-05-09	1	1	0	-3.1	9	-1.29979	617	0	60.574	0	-0.9	-3.39623	4	-0.849057
1818499	767632	Netherlands	female	neutered	2005-02-05	Hollandse Herder	22.08	7	22.08	617	Dry	Satiety Weight Management Dry	2015-03-07	5	2015-06-13	1	1	0	-4.42	14	-1.19137	617	0	60.574	0	-1.32	-4.98113	5	-0.996226
1819329	1501874	Portugal	female	neutered	2010-07-01	MINI	6.1	9	5.08	205	Dry	Satiety Small Dog	2015-03-09	1	2015-03-09	1	1	-2	0	0	#N/A	205	0	60.584	0	0	0	0
1819329	1501874	Portugal	female	neutered	2010-07-01	MINI	5.9	9	5.08	205	Dry	Satiety Small Dog	2015-03-09	2	2015-03-23	0	0	-3	-0.2	2	-1.63934	205	0	60.584	0	-0.2	-3.27869	2	-1.63934
1819329	1501874	Portugal	female	neutered	2010-07-01	MINI	5.7	9	5.08	205	Dry	Satiety Small Dog	2015-03-09	3	2015-04-06	0	0	-3	-0.4	4	-1.63934	205	0	60.584	0	-0.2	-3.27869	2	-1.63934
1819329	1501874	Portugal	female	neutered	2010-07-01	MINI	5.5	9	5.08	205	Dry	Satiety Small Dog	2015-03-09	4	2015-05-05	0	0	-2	-0.6	8.14286	-1.20794	205	0	60.584	0	-0.2	-3.27869	4.14286	-0.791408
1819329	1501874	Portugal	female	neutered	2010-07-01	MINI	5.1	9	5.08	205	Dry	Satiety Small Dog	2015-03-09	5	2015-06-08	0	1	-2	-1	13	-1.26103	205	0	60.584	0	-0.4	-6.55738	4.85714	-1.35005
1820282	1500331	Italy	male	intact	2006-02-14	MINI	8.5	7	7.08	349	Mix feeding	wet product : Satiety Weight Management Canine / dry product : Satiety Small Dog	2015-03-10	1	2015-03-10	0	0	-2	0	0	#N/A	349	0	80.408	0	0	0	0
1820282	1500331	Italy	male	intact	2006-02-14	MINI	8.2	7	7.08	349	Mix feeding	wet product : Satiety Weight Management Canine / dry product : Satiety Small Dog	2015-03-10	2	2015-03-25	0	0	-1	-0.3	2.14286	-1.64706	349	0	80.408	0	-0.3	-3.52941	2.14286	-1.64706
1820282	1500331	Italy	male	intact	2006-02-14	MINI	8	7	7.08	349	Mix feeding	wet product : Satiety Weight Management Canine / dry product : Satiety Small Dog	2015-03-10	3	2015-04-10	1	1	-1	-0.5	4.42857	-1.32827	349	0	80.408	0	-0.2	-2.35294	2.28571	-1.02941
1820282	1500331	Italy	male	intact	2006-02-14	MINI	7.2	7	7.08	349	Mix feeding	wet product : Satiety Weight Management Canine / dry product : Satiety Small Dog	2015-03-10	4	2015-05-10	1	1	-1	-1.3	8.71429	-1.75506	349	0	80.408	0	-0.8	-9.41176	4.28571	-2.19608
1820282	1500331	Italy	male	intact	2006-02-14	MINI	7	7	7.08	349	Dry	Obesity Management Dry	2015-03-10	5	2015-06-09	1	0	-1	-1.5	13	-1.35747	349	0	80.408	0	-0.2	-2.35294	4.28571	-0.54902
1820286	1500331	Italy	female	neutered	2008-03-12	Chihuahua	3.95	7	3.04	140	Mix feeding	wet product : Satiety Weight Management Canine / dry product : Satiety Small Dog	2015-03-10	1	2015-03-10	1	1	-1	0	0	#N/A	140	0	60.81	0	0	0	0
1820286	1500331	Italy	female	neutered	2008-03-12	Chihuahua	3.8	7	3.04	140	Mix feeding	wet product : Satiety Weight Management Canine / dry product : Satiety Small Dog	2015-03-10	2	2015-03-25	0	1	0	-0.15	2.14286	-1.77215	140	0	60.81	0	-0.15	-3.79747	2.14286	-1.77215
1820286	1500331	Italy	female	neutered	2008-03-12	Chihuahua	3.5	7	3.04	140	Mix feeding	wet product : Satiety Weight Management Canine / dry product : Satiety Small Dog	2015-03-10	3	2015-04-10	0	0	0	-0.45	4.42857	-2.57248	140	0	60.81	0	-0.3	-7.59494	2.28571	-3.32278
1820286	1500331	Italy	female	neutered	2008-03-12	Chihuahua	3.2	7	3.04	140	Wet	Satiety Weight Management Canine	2015-03-10	4	2015-05-10	0	1	0	-0.75	8.71429	-2.17888	140	0	60.81	0	-0.3	-7.59494	4.28571	-1.77215
1820286	1500331	Italy	female	neutered	2008-03-12	Chihuahua	3	7	3.04	140	Dry	Obesity Management Dry	2015-03-10	5	2015-06-09	0	1	0	-0.95	13	-1.85005	140	0	60.81	0	-0.2	-5.06329	4.28571	-1.18143
1820323	1213138	Italy	female	neutered	2012-03-02	Staffordshire Bull Terrier	20	8	16.67	500	Dry	Satiety Weight Management Dry	2015-03-10	1	2015-03-10	0	1	-2	0	0	#N/A	500	0	60.606	0	0	0	0
1820323	1213138	Italy	female	neutered	2012-03-02	Staffordshire Bull Terrier	19.4	8	16.67	500	Dry	Satiety Weight Management Dry	2015-03-10	2	2015-03-24	0	0	0	-0.6	2	-1.5	500	0	60.606	0	-0.6	-3	2	-1.5
1820323	1213138	Italy	female	neutered	2012-03-02	Staffordshire Bull Terrier	18.6	8	16.67	500	Dry	Satiety Weight Management Dry	2015-03-10	3	2015-04-07	1	1	0	-1.4	4	-1.75	500	0	60.606	0	-0.8	-4	2	-2
1820323	1213138	Italy	female	neutered	2012-03-02	Staffordshire Bull Terrier	17.8	8	16.67	500	Dry	Satiety Weight Management Dry	2015-03-10	4	2015-05-05	0	0	0	-2.2	8	-1.375	500	0	60.606	0	-0.8	-4	4	-1
1820323	1213138	Italy	female	neutered	2012-03-02	Staffordshire Bull Terrier	16.5	8	16.67	500	Dry	Satiety Weight Management Dry	2015-03-10	5	2015-06-09	1	1	-1	-3.5	13	-1.34615	500	0	60.606	0	-1.3	-6.5	5	-1.3
1820619	1510444	Germany	female	neutered	2005-07-25	Medium	21.5	7	15.36	470	Mix feeding	wet product : Satiety Weight Management Canine / dry product : Satiety Weight Management Dry	2015-03-16	1	2015-03-16	-1	-1	-2	0	0	#N/A	512.5	51	66.054	6.573	0	0	0
1820619	1510444	Germany	female	neutered	2005-07-25	Medium	19.9	7	15.36	521	Mix feeding	wet product : Satiety Weight Management Canine / dry product : Satiety Weight Management Dry	2015-03-16	2	2015-03-30	0	0	0	-1.6	2	-3.72093	512.5	51	66.054	6.573	-1.6	-7.44186	2	-3.72093
1820619	1510444	Germany	female	neutered	2005-07-25	Medium	19.1	7	15.36	521	Mix feeding	wet product : Satiety Weight Management Canine / dry product : Satiety Weight Management Dry	2015-03-16	3	2015-04-13	0	0	0	-2.4	4	-2.7907	512.5	51	66.054	6.573	-0.8	-3.72093	2	-1.86047
1820619	1510444	Germany	female	neutered	2005-07-25	Medium	18	7	15.36	521	Mix feeding	wet product : Satiety Weight Management Canine / dry product : Satiety Small Dog	2015-03-16	4	2015-05-11	0	0	0	-3.5	8	-2.03488	512.5	51	66.054	6.573	-1.1	-5.11628	4	-1.27907
1820619	1510444	Germany	female	neutered	2005-07-25	Medium	17.3	7	15.36	521	Mix feeding	wet product : Satiety Weight Management Canine / dry product : Satiety Weight Management Dry	2015-03-16	5	2015-06-08	1	0	0	-4.2	12	-1.62791	512.5	51	66.054	6.573	-0.7	-3.25581	4	-0.813953
1820652	1510432	Germany	female	neutered	2010-03-10	Rottweiler	45.5	9	32.5	824	Dry	Satiety Weight Management Dry	2015-03-10	1	2015-03-10	-1	0	-2	0	0	#N/A	799	-75	58.699	-5.51	0	0	0
1820652	1510432	Germany	female	neutered	2010-03-10	Rottweiler	44.3	9	32.5	824	Dry	Satiety Weight Management Dry	2015-03-10	2	2015-03-24	-1	0	-1	-1.2	2	-1.31868	799	-75	58.699	-5.51	-1.2	-2.63736	2	-1.31868
1820652	1510432	Germany	female	neutered	2010-03-10	Rottweiler	43.1	9	32.5	824	Dry	Satiety Weight Management Dry	2015-03-10	3	2015-04-13	0	0	-1	-2.4	4.85714	-1.08597	799	-75	58.699	-5.51	-1.2	-2.63736	2.85714	-0.923077
1820652	1510432	Germany	female	neutered	2010-03-10	Rottweiler	42.7	9	32.5	749	Dry	Satiety Weight Management Dry	2015-03-10	4	2015-05-05	-1	0	-1	-2.8	8	-0.769231	799	-75	58.699	-5.51	-0.4	-0.879121	3.14286	-0.27972
1820652	1510432	Germany	female	neutered	2010-03-10	Rottweiler	41.9	9	32.5	674	Dry	Satiety Weight Management Dry	2015-03-10	5	2015-06-08	-1	0	-2	-3.6	12.8571	-0.615385	799	-75	58.699	-5.51	-0.8	-1.75824	4.85714	-0.361991
1821194	1508565	Slovakia	female	intact	2010-03-11	Chihuahua	3	7	2.5	140	Mix feeding	wet product : Satiety Weight Management Canine / dry product : Satiety Small Dog	2015-03-11	1	2015-03-11	-1	-1	-2	0	0	#N/A	161.667	29	81.314	14.586	0	0	0
1821194	1508565	Slovakia	female	intact	2010-03-11	Chihuahua	2.8	7	2.5	154	Mix feeding	wet product : Satiety Weight Management Canine / dry product : Satiety Small Dog	2015-03-11	2	2015-03-25	0	0	0	-0.2	2	-3.33333	161.667	29	81.314	14.586	-0.2	-6.66667	2	-3.33333
1821194	1508565	Slovakia	female	intact	2010-03-11	Chihuahua	2.6	7	2.5	169	Mix feeding	wet product : Satiety Weight Management Canine / dry product : Satiety Small Dog	2015-03-11	3	2015-04-10	0	0	-1	-0.4	4.28571	-3.11111	161.667	29	81.314	14.586	-0.2	-6.66667	2.28571	-2.91667
1821194	1508565	Slovakia	female	intact	2010-03-11	Chihuahua	2.6	7	2.5	169	Dry	Satiety Small Dog	2015-03-11	4	2015-05-11	1	1	-1	-0.4	8.71429	-1.53005	161.667	29	81.314	14.586	0	0	4.42857	0
1821194	1508565	Slovakia	female	intact	2010-03-11	Chihuahua	2.5	7	2.5	169	Dry	Satiety Small Dog	2015-03-11	5	2015-06-12	1	1	0	-0.5	13.2857	-1.25448	161.667	29	81.314	14.586	-0.1	-3.33333	4.57143	-0.729167
1821396	1232841	Italy	female	neutered	2011-12-05	Carlino	10	7	8.33	297	Dry	Satiety Small Dog	2015-04-11	1	2015-04-11	0	0	-2	0	0	#N/A	288	-27	58.737	-5.507	0	0	0
1821396	1232841	Italy	female	neutered	2011-12-05	Carlino	9.2	7	8.33	297	Dry	Satiety Small Dog	2015-04-11	2	2015-05-04	0	0	0	-0.8	3.28571	-2.43478	288	-27	58.737	-5.507	-0.8	-8	3.28571	-2.43478
1821396	1232841	Italy	female	neutered	2011-12-05	Carlino	9.4	7	8.33	297	Dry	Satiety Small Dog	2015-04-11	3	2015-05-14	0	1	-1	-0.6	4.71429	-1.27273	288	-27	58.737	-5.507	0.2	2	1.42857	1.4
1821396	1232841	Italy	female	neutered	2011-12-05	Carlino	9.1	7	8.33	270	Dry	Satiety Small Dog	2015-04-11	4	2015-06-16	0	0	-1	-0.9	9.42857	-0.954545	288	-27	58.737	-5.507	-0.3	-3	4.71429	-0.636364
1821396	1232841	Italy	female	neutered	2011-12-05	Carlino	8.7	7	8.33	270	Dry	Satiety Small Dog	2015-04-11	5	2015-07-09	0	1	-1	-1.3	12.7143	-1.02247	288	-27	58.737	-5.507	-0.4	-4	3.28571	-1.21739
1821437	1429140	Spain	female	neutered	2005-09-15	Schnauzer	10.5	7	8.08	290	Dry	Satiety Small Dog	2015-03-11	1	2015-03-11	1	1	-1	0	0	#N/A	290	0	60.512	0	0	0	0
1821437	1429140	Spain	female	neutered	2005-09-15	Schnauzer	10.15	7	8.08	290	Dry	Satiety Small Dog	2015-03-11	2	2015-03-25	1	1	-1	-0.35	2	-1.66667	290	0	60.512	0	-0.35	-3.33333	2	-1.66667
1821437	1429140	Spain	female	neutered	2005-09-15	Schnauzer	9.73	7	8.08	290	Dry	Satiety Small Dog	2015-03-11	3	2015-04-22	1	1	0	-0.77	6	-1.22222	290	0	60.512	0	-0.42	-4	4	-1
1821437	1429140	Spain	female	neutered	2005-09-15	Schnauzer	9.55	7	8.08	290	Dry	Satiety Small Dog	2015-03-11	4	2015-05-11	1	0	-1	-0.95	8.71429	-1.03825	290	0	60.512	0	-0.18	-1.71429	2.71429	-0.631579
1821437	1429140	Spain	female	neutered	2005-09-15	Schnauzer	9.2	7	8.08	290	Dry	Satiety Small Dog	2015-03-11	5	2015-05-27	1	1	-1	-1.3	11	-1.12554	290	0	60.512	0	-0.35	-3.33333	2.28571	-1.45833
1821455	1502313	USA	female	neutered	2009-03-11	Siberian Husky	37.83	7	31.525	805	Dry	Satiety Weight Management Dry	2015-03-11	1	2015-03-11	-1	0	-1	0	0	#N/A	676.167	-204	50.823	-15.333	0	0	0
1821455	1502313	USA	female	neutered	2009-03-11	Siberian Husky	38.1022	7	31.525	732	Dry	Satiety Weight Management Dry	2015-03-11	2	2015-03-25	0	0	-1	0.272158	2	0.359712	676.167	-204	50.823	-15.333	0.272158	0.719424	2	0.359712
1821455	1502313	USA	female	neutered	2009-03-11	Siberian Husky	36.8321	7	31.525	659	Dry	Satiety Weight Management Dry	2015-03-11	3	2015-04-08	0	0	0	-0.997913	4	-0.659472	676.167	-204	50.823	-15.333	-1.27007	-3.35731	2	-1.67866
1821455	1502313	USA	female	neutered	2009-03-11	Siberian Husky	35.9249	7	31.525	601	Dry	Satiety Weight Management Dry	2015-03-11	4	2015-05-06	0	0	-1	-1.90511	8	-0.629496	676.167	-204	50.823	-15.333	-0.907194	-2.39808	4	-0.59952
1821455	1502313	USA	female	neutered	2009-03-11	Siberian Husky	34.927	7	31.525	542	Dry	Satiety Weight Management Dry	2015-03-11	5	2015-06-03	0	-1	-1	-2.90302	12	-0.639488	676.167	-204	50.823	-15.333	-0.997913	-2.63789	4	-0.659472
1821464	1502313	USA	female	neutered	2009-03-11	Yorkshire Terrier	6.71324	7	5.16193	208	Dry	Satiety Small Dog	2015-03-11	1	2015-03-11	0	0	-3	0	0	#N/A	192.167	-19	56.114	-5.548	0	0	0
1821464	1502313	USA	female	neutered	2009-03-11	Yorkshire Terrier	6.57716	7	5.16193	189	Dry	Satiety Small Dog	2015-03-11	2	2015-03-26	-1	0	-3	-0.136079	2.14286	-0.945946	192.167	-19	56.114	-5.548	-0.136079	-2.02703	2.14286	-0.945946
1821464	1502313	USA	female	neutered	2009-03-11	Yorkshire Terrier	6.12356	7	5.16193	189	Dry	Satiety Small Dog	2015-03-11	3	2015-04-09	0	0	-3	-0.589676	4.14286	-2.12022	192.167	-19	56.114	-5.548	-0.453597	-6.75676	2	-3.37838
1821464	1502313	USA	female	neutered	2009-03-11	Yorkshire Terrier	5.66996	7	5.16193	189	Dry	Satiety Small Dog	2015-03-11	4	2015-05-07	0	0	-2	-1.04327	8.14286	-1.90849	192.167	-19	56.114	-5.548	-0.453597	-6.75676	4	-1.68919
1821464	1502313	USA	female	neutered	2009-03-11	Yorkshire Terrier	5.35244	7	5.16193	189	Dry	Satiety Small Dog	2015-03-11	5	2015-06-04	0	0	-2	-1.36079	12.1429	-1.66932	192.167	-19	56.114	-5.548	-0.317518	-4.72973	4	-1.18243
1821473	1504394	USA	male	neutered	2010-06-20	Border Collie	32.4775	7	27.0661	836	Dry	Satiety Weight Management Dry	2015-03-11	1	2015-03-11	0	1	0	0	0	#N/A	696.667	-222	58.709	-18.708	0	0	0
1821473	1504394	USA	male	neutered	2010-06-20	Border Collie	32.0239	7	27.0661	758	Mix feeding	wet product : Satiety Weight Management Canine / dry product : Satiety Weight Management Dry	2015-03-11	2	2015-03-25	0	1	0	-0.453597	2	-0.698324	696.667	-222	58.709	-18.708	-0.453597	-1.39665	2	-0.698324
1821473	1504394	USA	male	neutered	2010-06-20	Border Collie	32.4775	7	27.0661	679	Mix feeding	wet product : Satiety Weight Management Canine / dry product : Satiety Weight Management Dry	2015-03-11	3	2015-04-08	0	1	0	0	4	0	696.667	-222	58.709	-18.708	0.453597	1.39665	2	0.698324
1821473	1504394	USA	male	neutered	2010-06-20	Border Collie	32.0239	7	27.0661	614	Mix feeding	wet product : Satiety Weight Management Canine / dry product : Satiety Weight Management Dry	2015-03-11	4	2015-05-06	-1	1	0	-0.453597	8	-0.174581	696.667	-222	58.709	-18.708	-0.453597	-1.39665	4	-0.349162
1821473	1504394	USA	male	neutered	2010-06-20	Border Collie	31.3889	7	27.0661	549	Mix feeding	wet product : Satiety Weight Management Canine / dry product : Satiety Weight Management Dry	2015-03-11	5	2015-06-03	0	1	0	-1.08863	12	-0.27933	696.667	-222	58.709	-18.708	-0.635036	-1.95531	4	-0.488827
1821673	574512	Norway	female	intact	2011-03-16	Border Collie	27.5	7	24	764	Dry	Satiety Weight Management Dry	2015-03-12	1	2015-03-12	0	0	0	0	0	#N/A	764	0	70.459	0	0	0	0
1821673	574512	Norway	female	intact	2011-03-16	Border Collie	25.9	7	24	764	Dry	Satiety Weight Management Dry	2015-03-12	2	2015-03-26	0	0	-1	-1.6	2	-2.90909	764	0	70.459	0	-1.6	-5.81818	2	-2.90909
1821673	574512	Norway	female	intact	2011-03-16	Border Collie	25.7	7	24	764	Dry	Satiety Weight Management Dry	2015-03-12	3	2015-04-09	1	1	0	-1.8	4	-1.63636	764	0	70.459	0	-0.2	-0.727273	2	-0.363636
1821673	574512	Norway	female	intact	2011-03-16	Border Collie	23.7	7	24	764	Dry	Satiety Weight Management Dry	2015-03-12	4	2015-05-13	1	1	-1	-3.8	8.85714	-1.56012	764	0	70.459	0	-2	-7.27273	4.85714	-1.49733
1821673	574512	Norway	female	intact	2011-03-16	Border Collie	23.6	7	24	764	Dry	Satiety Weight Management Dry	2015-03-12	5	2015-06-10	1	1	0	-3.9	12.8571	-1.10303	764	0	70.459	0	-0.1	-0.363636	4	-0.0909091
1821712	1072574	Denmark	male	neutered	2011-12-26	Golden Retriever	38.2	8	31.83	944	Dry	Satiety Weight Management - overvÃ¦gtsdiÃ¦t	2015-03-12	1	2015-03-12	0	1	0	0	0	#N/A	944	0	70.444	0	0	0	0
1821712	1072574	Denmark	male	neutered	2011-12-26	Golden Retriever	36.8	8	31.83	944	Dry	Satiety Weight Management - overvÃ¦gtsdiÃ¦t	2015-03-12	2	2015-03-26	0	0	0	-1.4	2	-1.83246	944	0	70.444	0	-1.4	-3.66492	2	-1.83246
1821712	1072574	Denmark	male	neutered	2011-12-26	Golden Retriever	36.05	8	31.83	944	Dry	Satiety Weight Management - overvÃ¦gtsdiÃ¦t	2015-03-12	3	2015-04-09	0	0	0	-2.15	4	-1.40707	944	0	70.444	0	-0.75	-1.96335	2	-0.981675
1821712	1072574	Denmark	male	neutered	2011-12-26	Golden Retriever	35	8	31.83	944	Dry	Satiety Weight Management - overvÃ¦gtsdiÃ¦t	2015-03-12	4	2015-05-07	0	0	0	-3.2	8	-1.04712	944	0	70.444	0	-1.05	-2.74869	4	-0.687173
1821712	1072574	Denmark	male	neutered	2011-12-26	Golden Retriever	34.1	8	31.83	900	Dry	Satiety Weight Management - overvÃ¦gtsdiÃ¦t	2015-03-12	5	2015-06-01	0	0	-1	-4.1	11.5714	-0.927542	944	0	70.444	0	-0.9	-2.35602	3.57143	-0.659686
1822121	1499567	Hungary	male	neutered	2010-10-24	Labrador Retriever	66.5	8	47.5	1274	Dry	Satiety Weight Management Dry	2015-03-12	1	2015-03-12	0	0	-2	0	0	#N/A	1234.33	-119	68.22	-6.577	0	0	0
1822121	1499567	Hungary	male	neutered	2010-10-24	Labrador Retriever	63.4	8	47.5	1274	Dry	Satiety Weight Management Dry	2015-03-12	2	2015-03-28	0	0	-1	-3.1	2.28571	-2.03947	1234.33	-119	68.22	-6.577	-3.1	-4.66165	2.28571	-2.03947
1822121	1499567	Hungary	male	neutered	2010-10-24	Labrador Retriever	63.5	8	47.5	1274	Dry	Satiety Weight Management Dry	2015-03-12	3	2015-04-11	0	0	-1	-3	4.28571	-1.05263	1234.33	-119	68.22	-6.577	0.1	0.150376	2	0.075188
1822121	1499567	Hungary	male	neutered	2010-10-24	Labrador Retriever	62.3	8	47.5	1155	Dry	Satiety Weight Management Dry	2015-03-12	4	2015-05-09	0	0	-1	-4.2	8.28571	-0.76225	1234.33	-119	68.22	-6.577	-1.2	-1.80451	4	-0.451128
1822121	1499567	Hungary	male	neutered	2010-10-24	Labrador Retriever	62.3	8	47.5	1035	Dry	Satiety Weight Management Dry	2015-03-12	5	2015-06-13	0	0	-1	-4.2	13.2857	-0.475382	1234.33	-119	68.22	-6.577	0	0	5	0
1822193	1507104	USA	female	neutered	2012-03-06	Beagle	14.0615	9	11.7164	384	Dry	Satiety Small Dog	2015-03-12	1	2015-03-12	0	0	-2	0	0	#N/A	349	-70	55.11	-11.054	0	0	0
1822193	1507104	USA	female	neutered	2012-03-06	Beagle	13.7893	9	11.7164	384	Dry	Satiety Small Dog	2015-03-12	2	2015-03-17	0	0	-2	-0.272158	0.714286	-2.70968	349	-70	55.11	-11.054	-0.272158	-1.93548	0.714286	-2.70968
1822193	1507104	USA	female	neutered	2012-03-06	Beagle	13.7893	9	11.7164	349	Dry	Satiety Small Dog	2015-03-12	3	2015-04-06	0	0	-1	-0.272158	3.57143	-0.541935	349	-70	55.11	-11.054	0	0	2.85714	0
1822193	1507104	USA	female	neutered	2012-03-06	Beagle	13.5172	9	11.7164	314	Dry	Satiety Small Dog	2015-03-12	4	2015-05-05	0	0	-1	-0.544316	7.71429	-0.501792	349	-70	55.11	-11.054	-0.272158	-1.93548	4.14286	-0.467186
1822193	1507104	USA	female	neutered	2012-03-06	Beagle	13.0636	9	11.7164	286	Dry	Satiety Small Dog	2015-03-12	5	2015-06-02	1	0	-1	-0.997913	11.7143	-0.605822	349	-70	55.11	-11.054	-0.453597	-3.22581	4	-0.806452
1822203	1507104	USA	male	neutered	2013-03-06	Australian Shepherd Dog	39.7351	7	30.5634	916	Dry	Satiety Weight Management Dry	2015-03-21	1	2015-03-21	1	1	-1	0	0	#N/A	887.333	-86	68.263	-6.616	0	0	0
1822203	1507104	USA	male	neutered	2013-03-06	Australian Shepherd Dog	38.1294	7	30.5634	916	Dry	Satiety Weight Management Dry	2015-03-21	2	2015-04-04	1	1	-1	-1.60573	2	-2.02055	887.333	-86	68.263	-6.616	-1.60573	-4.0411	2	-2.02055
1822203	1507104	USA	male	neutered	2013-03-06	Australian Shepherd Dog	37.9207	7	30.5634	916	Dry	Satiety Weight Management Dry	2015-03-21	3	2015-04-18	0	0	0	-1.81439	4	-1.14155	887.333	-86	68.263	-6.616	-0.208655	-0.525114	2	-0.262557
1822203	1507104	USA	male	neutered	2013-03-06	Australian Shepherd Dog	36.6506	7	30.5634	830	Dry	Satiety Weight Management Dry	2015-03-21	4	2015-05-23	0	0	0	-3.08446	9	-0.862506	887.333	-86	68.263	-6.616	-1.27007	-3.19635	5	-0.639269
1822203	1507104	USA	male	neutered	2013-03-06	Australian Shepherd Dog	36.0156	7	30.5634	744	Dry	Satiety Weight Management Dry	2015-03-21	5	2015-06-20	1	1	0	-3.7195	13	-0.720056	887.333	-86	68.263	-6.616	-0.635036	-1.59817	4	-0.399543
1822216	1507104	USA	female	neutered	2009-03-04	Australian Shepherd Dog	29.756	7	22.8885	634	Dry	Satiety Weight Management Dry	2015-03-12	1	2015-03-12	1	0	0	0	0	#N/A	595.333	-58	56.891	-5.543	0	0	0
1822216	1507104	USA	female	neutered	2009-03-04	Australian Shepherd Dog	29.3024	7	22.8885	634	Dry	Satiety Weight Management Dry	2015-03-12	2	2015-03-18	0	0	0	-0.453597	0.857143	-1.77846	595.333	-58	56.891	-5.543	-0.453597	-1.52439	0.857143	-1.77846
1822216	1507104	USA	female	neutered	2009-03-04	Australian Shepherd Dog	29.1209	7	22.8885	576	Dry	Satiety Weight Management Dry	2015-03-12	3	2015-04-02	1	0	0	-0.635036	3	-0.711382	595.333	-58	56.891	-5.543	-0.181439	-0.609756	2.14286	-0.284553
1822216	1507104	USA	female	neutered	2009-03-04	Australian Shepherd Dog	26.8529	7	22.8885	576	Dry	Satiety Weight Management Dry	2015-03-12	4	2015-05-02	1	0	0	-2.90302	7.28571	-1.33907	595.333	-58	56.891	-5.543	-2.26799	-7.62195	4.28571	-1.77846
1822216	1507104	USA	female	neutered	2009-03-04	Australian Shepherd Dog	25.855	7	22.8885	576	Dry	Satiety Weight Management Dry	2015-03-12	5	2015-06-08	0	0	0	-3.90093	12.5714	-1.04282	595.333	-58	56.891	-5.543	-0.997913	-3.35366	5.28571	-0.634476
1822231	1507572	USA	female	neutered	2011-03-11	Medium	25.9911	9	21.3191	601	Dry	Satiety Weight Management Dry	2015-03-12	1	2015-03-12	1	1	-3	0	0	#N/A	546.333	-109	55.066	-10.986	0	0	0
1822231	1507572	USA	female	neutered	2011-03-11	Medium	25.1293	9	21.3191	601	Dry	Satiety Weight Management Dry	2015-03-12	2	2015-03-26	0	1	-2	-0.861834	2	-1.65794	546.333	-109	55.066	-10.986	-0.861834	-3.31588	2	-1.65794
1822231	1507572	USA	female	neutered	2011-03-11	Medium	25.0386	9	21.3191	546	Dry	Satiety Weight Management Dry	2015-03-12	3	2015-04-09	1	1	0	-0.952554	4	-0.91623	546.333	-109	55.066	-10.986	-0.0907194	-0.34904	2	-0.17452
1822231	1507572	USA	female	neutered	2011-03-11	Medium	24.3128	9	21.3191	492	Dry	Satiety Weight Management Dry	2015-03-12	4	2015-05-07	0	1	0	-1.67831	8	-0.807155	546.333	-109	55.066	-10.986	-0.725755	-2.79232	4	-0.69808
1822231	1507572	USA	female	neutered	2011-03-11	Medium	23.6778	9	21.3191	448	Dry	Satiety Weight Management Dry	2015-03-12	5	2015-06-04	1	0	-1	-2.31334	12	-0.74171	546.333	-109	55.066	-10.986	-0.635036	-2.44328	4	-0.61082
1823159	767632	Netherlands	male	neutered	2013-03-13	Medium	34.9	7	26.85	831	Dry	Satiety Support Dry	2015-03-13	1	2015-03-13	-1	1	-1	0	0	#N/A	831	0	70.452	0	0	0	0
1823159	767632	Netherlands	male	neutered	2013-03-13	Medium	33.8	7	26.85	831	Dry	Satiety Weight Management Dry	2015-03-13	2	2015-03-27	0	1	-1	-1.1	2	-1.57593	831	0	70.452	0	-1.1	-3.15186	2	-1.57593
1823159	767632	Netherlands	male	neutered	2013-03-13	Medium	32.1	7	26.85	831	Dry	Satiety Weight Management Dry	2015-03-13	3	2015-04-17	0	0	-2	-2.8	5	-1.60458	831	0	70.452	0	-1.7	-4.87106	3	-1.62369
1823159	767632	Netherlands	male	neutered	2013-03-13	Medium	31.3	7	26.85	831	Dry	Satiety Weight Management Dry	2015-03-13	4	2015-05-15	0	0	-2	-3.6	9	-1.14613	831	0	70.452	0	-0.8	-2.29226	4	-0.573066
1823159	767632	Netherlands	male	neutered	2013-03-13	Medium	30.5	7	26.85	831	Dry	Satiety Weight Management Dry	2015-03-13	5	2015-06-05	0	1	-1	-4.4	12	-1.05062	831	0	70.452	0	-0.8	-2.29226	3	-0.764088
1823162	1072574	Denmark	male	neutered	2010-03-13	Golden Retriever	43	7	35.83	1031	Mix feeding	wet product : Satiety Weight Management - overvÃ¦gtsdiÃ¦t, vÃ¥dfoder / dry product : Satiety Weight Management - overvÃ¦gtsdiÃ¦t	2015-03-18	1	2015-03-18	0	1	-2	0	0	#N/A	951	-96	64.937	-6.555	0	0	0
1823162	1072574	Denmark	male	neutered	2010-03-13	Golden Retriever	42.5	7	35.83	935	Mix feeding	wet product : Satiety Weight Management - overvÃ¦gtsdiÃ¦t, vÃ¥dfoder / dry product : Satiety Weight Management - overvÃ¦gtsdiÃ¦t	2015-03-18	2	2015-04-01	-1	1	-3	-0.5	2	-0.581395	951	-96	64.937	-6.555	-0.5	-1.16279	2	-0.581395
1823162	1072574	Denmark	male	neutered	2010-03-13	Golden Retriever	40.9	7	35.83	935	Mix feeding	wet product : Satiety Weight Management - overvÃ¦gtsdiÃ¦t, vÃ¥dfoder / dry product : Satiety Weight Management - overvÃ¦gtsdiÃ¦t	2015-03-18	3	2015-04-15	0	0	-3	-2.1	4	-1.22093	951	-96	64.937	-6.555	-1.6	-3.72093	2	-1.86047
1823162	1072574	Denmark	male	neutered	2010-03-13	Golden Retriever	38.9	7	35.83	935	Mix feeding	wet product : Satiety Weight Management - overvÃ¦gtsdiÃ¦t, vÃ¥dfoder / dry product : Satiety Weight Management - overvÃ¦gtsdiÃ¦t	2015-03-18	4	2015-05-13	0	0	-3	-4.1	8	-1.19186	951	-96	64.937	-6.555	-2	-4.65116	4	-1.16279
1823162	1072574	Denmark	male	neutered	2010-03-13	Golden Retriever	39.3	7	35.83	935	Mix feeding	wet product : Satiety Weight Management - overvÃ¦gtsdiÃ¦t, vÃ¥dfoder / dry product : Satiety Weight Management - overvÃ¦gtsdiÃ¦t	2015-03-18	5	2015-06-17	0	0	-3	-3.7	13	-0.661896	951	-96	64.937	-6.555	0.4	0.930233	5	0.186047
1823191	1511515	Slovakia	female	neutered	2010-03-13	X-SMALL	7	7	5.83	252	Dry	Satiety Small Dog	2015-04-13	1	2015-04-13	0	1	-1	0	0	#N/A	231.167	-25	61.613	-6.663	0	0	0
1823191	1511515	Slovakia	female	neutered	2010-03-13	X-SMALL	6.9	7	5.83	227	Dry	Satiety Small Dog	2015-04-13	2	2015-04-24	1	1	-1	-0.1	1.57143	-0.909091	231.167	-25	61.613	-6.663	-0.1	-1.42857	1.57143	-0.909091
1823191	1511515	Slovakia	female	neutered	2010-03-13	X-SMALL	6.7	7	5.83	227	Dry	Satiety Small Dog	2015-04-13	3	2015-05-12	1	1	-1	-0.3	4.14286	-1.03448	231.167	-25	61.613	-6.663	-0.2	-2.85714	2.57143	-1.11111
1823191	1511515	Slovakia	female	neutered	2010-03-13	X-SMALL	6.4	7	5.83	227	Dry	Satiety Small Dog	2015-04-13	4	2015-06-12	1	1	0	-0.6	8.57143	-1	231.167	-25	61.613	-6.663	-0.3	-4.28571	4.42857	-0.967742
1823191	1511515	Slovakia	female	neutered	2010-03-13	X-SMALL	6.3	7	5.83	203	Dry	Satiety Small Dog	2015-04-13	5	2015-07-15	1	1	0	-0.7	13.2857	-0.752688	231.167	-25	61.613	-6.663	-0.1	-1.42857	4.71429	-0.30303
1823540	1508563	USA	male	neutered	2007-03-13	Labrador Retriever	47.2195	7	39.3495	1107	Mix feeding	wet product : Satiety Weight Management Canine / dry product : Satiety Weight Management Dry	2015-03-31	1	2015-03-14	0	0	0	0	0	#N/A	1072.33	-104	68.254	-6.62	0	0	0
1823540	1508563	USA	male	neutered	2007-03-13	Labrador Retriever	47.2195	7	39.3495	1107	Mix feeding	wet product : Satiety Weight Management Canine / dry product : Satiety Weight Management Dry	2015-03-31	2	2015-03-31	0	0	-1	0	2.42857	0	1072.33	-104	68.254	-6.62	0	0	2.42857	0
1823540	1508563	USA	male	neutered	2007-03-13	Labrador Retriever	47.2195	7	39.3495	1107	Mix feeding	wet product : Satiety Weight Management Canine / dry product : Satiety Weight Management Dry	2015-03-31	3	2015-04-14	0	1	0	0	4.42857	0	1072.33	-104	68.254	-6.62	0	0	2	0
1823540	1508563	USA	male	neutered	2007-03-13	Labrador Retriever	47.3102	7	39.3495	1003	Mix feeding	wet product : Satiety Weight Management Canine / dry product : Satiety Weight Management Dry	2015-03-31	4	2015-04-27	0	1	0	0.0907194	6.28571	0.030565	1072.33	-104	68.254	-6.62	0.0907194	0.192123	1.85714	0.103451
1823540	1508563	USA	male	neutered	2007-03-13	Labrador Retriever	47.2648	7	39.3495	899	Mix feeding	wet product : Satiety Weight Management Canine / dry product : Satiety Weight Management Dry	2015-03-31	5	2015-05-26	0	0	0	0.0453597	10.4286	0.00921138	1072.33	-104	68.254	-6.62	-0.0453597	-0.0960615	4.14286	-0.0231873
1823598	1508576	Portugal	female	neutered	2012-06-04	French Bulldog	14.2	7	12.5	403	Mix feeding	wet product : Satiety Weight Management Canine / dry product : Satiety Weight Management Dry	2015-03-14	1	2015-03-14	1	1	-2	0	0	#N/A	439.667	44	66.136	6.619	0	0	0
1823598	1508576	Portugal	female	neutered	2012-06-04	French Bulldog	12.6	7	12.5	447	Mix feeding	wet product : Satiety Weight Management Canine / dry product : Satiety Weight Management Dry	2015-03-14	2	2015-03-28	0	0	-2	-1.6	2	-5.6338	439.667	44	66.136	6.619	-1.6	-11.2676	2	-5.6338
1823598	1508576	Portugal	female	neutered	2012-06-04	French Bulldog	12.4	7	12.5	447	Dry	Satiety Small Dog	2015-03-14	3	2015-04-10	0	0	-2	-1.8	3.85714	-3.28638	439.667	44	66.136	6.619	-0.2	-1.40845	1.85714	-0.758397
1823598	1508576	Portugal	female	neutered	2012-06-04	French Bulldog	12.4	7	12.5	447	Dry	Satiety Weight Management Dry	2015-03-14	4	2015-05-16	1	1	-2	-1.8	9	-1.40845	439.667	44	66.136	6.619	0	0	5.14286	0
1823598	1508576	Portugal	female	neutered	2012-06-04	French Bulldog	12	7	12.5	447	Dry	Satiety Weight Management Dry	2015-03-14	5	2015-06-16	1	1	0	-2.2	13.4286	-1.15373	439.667	44	66.136	6.619	-0.4	-2.8169	4.42857	-0.636075
1823601	1509394	Spain	female	neutered	2008-10-06	X-SMALL	10.7	7	8.23	294	Dry	Satiety Small Dog	2015-03-14	1	2015-03-14	-1	0	-1	0	0	#N/A	247.333	-74	50.902	-15.229	0	0	0
1823601	1509394	Spain	female	neutered	2008-10-06	X-SMALL	10.9	7	8.23	268	Dry	Satiety Small Dog	2015-03-14	2	2015-03-27	0	1	-1	0.2	1.85714	1.00647	247.333	-74	50.902	-15.229	0.2	1.86916	1.85714	1.00647
1823601	1509394	Spain	female	neutered	2008-10-06	X-SMALL	11.15	7	8.23	241	Dry	Satiety Weight Management Dry	2015-03-14	3	2015-04-11	0	0	-3	0.45	4	1.0514	247.333	-74	50.902	-15.229	0.25	2.33645	2.14286	1.09034
1823601	1509394	Spain	female	neutered	2008-10-06	X-SMALL	11.5	7	8.23	220	Dry	Satiety Small Dog	2015-03-14	4	2015-04-25	0	0	-3	0.8	6	1.24611	247.333	-74	50.902	-15.229	0.35	3.27103	2	1.63551
1823601	1509394	Spain	female	neutered	2008-10-06	X-SMALL	11.2	7	8.23	198	Dry	Satiety Weight Management Dry	2015-03-14	5	2015-05-26	0	0	-2	0.5	10.4286	0.448086	247.333	-74	50.902	-15.229	-0.3	-2.80374	4.42857	-0.633102
1823718	1234517	Italy	male	neutered	2004-03-14	Bassotto Tedesco	14.15	8	10.11	400	Dry	Satiety Small Dog	2015-03-14	1	2015-03-14	-1	0	-3	0	0	#N/A	356	-75	62.789	-13.228	0	0	0
1823718	1234517	Italy	male	neutered	2004-03-14	Bassotto Tedesco	14.1	8	10.11	362	Dry	Satiety Small Dog	2015-03-14	2	2015-03-27	-1	0	-3	-0.05	1.85714	-0.190269	356	-75	62.789	-13.228	-0.05	-0.353357	1.85714	-0.190269
1823718	1234517	Italy	male	neutered	2004-03-14	Bassotto Tedesco	13.5	8	10.11	362	Dry	Satiety Small Dog	2015-03-14	3	2015-04-13	0	0	-3	-0.65	4.28571	-1.07185	356	-75	62.789	-13.228	-0.6	-4.24028	2.42857	-1.746
1823718	1234517	Italy	male	neutered	2004-03-14	Bassotto Tedesco	13.2	8	10.11	325	Dry	Satiety Small Dog	2015-03-14	4	2015-05-09	0	0	-2	-0.95	8	-0.839223	356	-75	62.789	-13.228	-0.3	-2.12014	3.71429	-0.570807
1823718	1234517	Italy	male	neutered	2004-03-14	Bassotto Tedesco	12.8	8	10.11	294	Dry	Satiety Small Dog	2015-03-14	5	2015-06-13	0	0	-2	-1.35	13	-0.733895	356	-75	62.789	-13.228	-0.4	-2.82686	5	-0.565371
1824012	1492891	USA	male	neutered	2006-09-13	Labrador Retriever	39.9619	8	28.5449	870	Dry	Satiety Weight Management Dry	2015-03-14	1	2015-03-14	0	0	0	0	0	#N/A	842.667	-82	68.235	-6.64	0	0	0
1824012	1492891	USA	male	neutered	2006-09-13	Labrador Retriever	38.465	8	28.5449	870	Dry	Satiety Weight Management Dry	2015-03-14	2	2015-03-31	1	-1	0	-1.49687	2.42857	-1.54236	842.667	-82	68.235	-6.64	-1.49687	-3.74574	2.42857	-1.54236
1824012	1492891	USA	male	neutered	2006-09-13	Labrador Retriever	37.7393	8	28.5449	870	Dry	Satiety Weight Management Dry	2015-03-14	3	2015-04-11	-1	0	-1	-2.22263	4	-1.39047	842.667	-82	68.235	-6.64	-0.725755	-1.81612	1.57143	-1.15571
1824012	1492891	USA	male	neutered	2006-09-13	Labrador Retriever	37.6486	8	28.5449	788	Dry	Satiety Weight Management Dry	2015-03-14	4	2015-05-09	1	1	0	-2.31334	8	-0.72361	842.667	-82	68.235	-6.64	-0.0907194	-0.227015	4	-0.0567537
1824012	1492891	USA	male	neutered	2006-09-13	Labrador Retriever	35.2898	8	28.5449	707	Dry	Satiety Weight Management Dry	2015-03-14	5	2015-06-09	0	0	0	-4.67205	12.4286	-0.940676	842.667	-82	68.235	-6.64	-2.3587	-5.90238	4.42857	-1.3328
1824784	1511517	Slovakia	male	neutered	2009-03-16	Chihuahua	3.2	8	2.67	148	Dry	Satiety Small Dog	2015-03-16	1	2015-03-16	-1	-1	0	0	0	#N/A	148	0	70.856	0	0	0	0
1824784	1511517	Slovakia	male	neutered	2009-03-16	Chihuahua	3	8	2.67	148	Dry	Satiety Small Dog	2015-03-16	2	2015-04-02	0	0	0	-0.2	2.42857	-2.57353	148	0	70.856	0	-0.2	-6.25	2.42857	-2.57353
1824784	1511517	Slovakia	male	neutered	2009-03-16	Chihuahua	3	8	2.67	148	Dry	Satiety Small Dog	2015-03-16	3	2015-04-20	0	0	0	-0.2	5	-1.25	148	0	70.856	0	0	0	2.57143	0
1824784	1511517	Slovakia	male	neutered	2009-03-16	Chihuahua	2.8	8	2.67	148	Dry	Satiety Small Dog	2015-03-16	4	2015-05-15	0	0	0	-0.4	8.57143	-1.45833	148	0	70.856	0	-0.2	-6.25	3.57143	-1.75
1824784	1511517	Slovakia	male	neutered	2009-03-16	Chihuahua	2.6	8	2.67	148	Dry	Satiety Small Dog	2015-03-16	5	2015-06-18	0	0	0	-0.6	13.4286	-1.39628	148	0	70.856	0	-0.2	-6.25	4.85714	-1.28676
1824884	1511537	Hungary	female	intact	2005-04-15	Havanese	6.6	9	5.08	239	Dry	Satiety Small Dog	2015-03-16	1	2015-03-16	0	-1	-2	0	0	#N/A	231.333	-23	68.366	-6.797	0	0	0
1824884	1511537	Hungary	female	intact	2005-04-15	Havanese	6.4	9	5.08	239	Dry	Satiety Small Dog	2015-03-16	2	2015-03-30	0	-1	-2	-0.2	2	-1.51515	231.333	-23	68.366	-6.797	-0.2	-3.0303	2	-1.51515
1824884	1511537	Hungary	female	intact	2005-04-15	Havanese	6.2	9	5.08	239	Dry	Satiety Small Dog	2015-03-16	3	2015-04-17	0	-1	-2	-0.4	4.57143	-1.32576	231.333	-23	68.366	-6.797	-0.2	-3.0303	2.57143	-1.17845
1824884	1511537	Hungary	female	intact	2005-04-15	Havanese	6.1	9	5.08	216	Dry	Satiety Small Dog	2015-03-16	4	2015-05-19	0	0	-1	-0.5	9.14286	-0.828598	231.333	-23	68.366	-6.797	-0.1	-1.51515	4.57143	-0.331439
1824884	1511537	Hungary	female	intact	2005-04-15	Havanese	5.9	9	5.08	216	Dry	Satiety Small Dog	2015-03-16	5	2015-05-26	1	1	0	-0.7	10.1429	-1.04567	231.333	-23	68.366	-6.797	-0.2	-3.0303	1	-3.0303
1824980	574361	Norway	male	intact	2010-10-04	Chinese Crested	10.8	8	8	382	Dry	Satiety Small Dog	2015-03-16	1	2015-03-16	0	1	-2	0	0	#N/A	358	-36	75.26	-7.568	0	0	0
1824980	574361	Norway	male	intact	2010-10-04	Chinese Crested	10.4	8	8	382	Dry	Satiety Small Dog	2015-03-16	2	2015-03-30	0	1	-2	-0.4	2	-1.85185	358	-36	75.26	-7.568	-0.4	-3.7037	2	-1.85185
1824980	574361	Norway	male	intact	2010-10-04	Chinese Crested	10.6	8	8	346	Dry	Satiety Small Dog	2015-03-16	3	2015-04-13	-1	0	-1	-0.2	4	-0.462963	358	-36	75.26	-7.568	0.2	1.85185	2	0.925926
1824980	574361	Norway	male	intact	2010-10-04	Chinese Crested	9.9	8	8	346	Dry	Satiety Small Dog	2015-03-16	4	2015-05-12	1	1	-1	-0.9	8.14286	-1.02339	358	-36	75.26	-7.568	-0.7	-6.48148	4.14286	-1.5645
1824980	574361	Norway	male	intact	2010-10-04	Chinese Crested	9.9	8	8	309	Dry	Satiety Small Dog	2015-03-16	5	2015-06-09	1	1	-2	-0.9	12.1429	-0.686275	358	-36	75.26	-7.568	0	0	4	0
1825048	1508576	Portugal	female	neutered	2006-11-01	X-SMALL	9.5	8	8	288	Dry	Satiety Weight Management Dry	2015-03-16	1	2015-03-16	-1	0	-1	0	0	#N/A	312.667	26	65.73	5.466	0	0	0
1825048	1508576	Portugal	female	neutered	2006-11-01	X-SMALL	8.6	8	8	320	Mix feeding	wet product : Satiety Weight Management Canine / dry product : Satiety Weight Management Dry	2015-03-16	2	2015-03-29	-1	0	-2	-0.9	1.85714	-5.10121	312.667	26	65.73	5.466	-0.9	-9.47368	1.85714	-5.10121
1825048	1508576	Portugal	female	neutered	2006-11-01	X-SMALL	8.7	8	8	320	Mix feeding	wet product : Satiety Weight Management Canine / dry product : Satiety Weight Management Dry	2015-03-16	3	2015-04-12	0	0	-1	-0.8	3.85714	-2.18324	312.667	26	65.73	5.466	0.1	1.05263	2	0.526316
1825048	1508576	Portugal	female	neutered	2006-11-01	X-SMALL	8.9	8	8	314	Mix feeding	wet product : Satiety Weight Management Canine / dry product : Satiety Weight Management Dry	2015-03-16	4	2015-05-11	0	0	-1	-0.6	8	-0.789474	312.667	26	65.73	5.466	0.2	2.10526	4.14286	0.508167
1825048	1508576	Portugal	female	neutered	2006-11-01	X-SMALL	8.95	8	8	283	Dry	Satiety Weight Management Dry	2015-03-16	5	2015-06-10	0	0	-1	-0.55	12.2857	-0.471236	312.667	26	65.73	5.466	0.05	0.526316	4.28571	0.122807
1825283	1514481	Germany	female	neutered	2005-01-01	Medium	16.8	8	14	438	Dry	Satiety Weight Management Dry	2015-03-16	1	2015-03-16	0	0	-1	0	0	#N/A	438	0	60.517	0	0	0	0
1825283	1514481	Germany	female	neutered	2005-01-01	Medium	16.4	8	14	438	Dry	Satiety Weight Management Dry	2015-03-16	2	2015-03-31	0	0	-1	-0.4	2.14286	-1.11111	438	0	60.517	0	-0.4	-2.38095	2.14286	-1.11111
1825283	1514481	Germany	female	neutered	2005-01-01	Medium	15.6	8	14	438	Dry	Satiety Weight Management Dry	2015-03-16	3	2015-04-15	0	0	-1	-1.2	4.28571	-1.66667	438	0	60.517	0	-0.8	-4.7619	2.14286	-2.22222
1825283	1514481	Germany	female	neutered	2005-01-01	Medium	15.2	8	14	438	Dry	Satiety Weight Management Dry	2015-03-16	4	2015-05-12	0	0	-1	-1.6	8.14286	-1.16959	438	0	60.517	0	-0.4	-2.38095	3.85714	-0.617284
1825283	1514481	Germany	female	neutered	2005-01-01	Medium	14.3	8	14	438	Dry	Satiety Weight Management Dry	2015-03-16	5	2015-06-15	0	0	0	-2.5	13	-1.14469	438	0	60.517	0	-0.9	-5.35714	4.85714	-1.10294
1825300	1514481	Germany	female	neutered	2006-06-01	Maxi	36.1	7	27.77	732	Dry	Satiety Weight Management Dry	2015-03-16	1	2015-03-16	0	1	-3	0	0	#N/A	614.667	-186	50.811	-15.376	0	0	0
1825300	1514481	Germany	female	neutered	2006-06-01	Maxi	35.7	7	27.77	666	Dry	Satiety Weight Management Dry	2015-03-16	2	2015-04-02	0	1	-3	-0.4	2.42857	-0.456249	614.667	-186	50.811	-15.376	-0.4	-1.10803	2.42857	-0.456249
1825300	1514481	Germany	female	neutered	2006-06-01	Maxi	35.4	7	27.77	599	Dry	Satiety Weight Management Dry	2015-03-16	3	2015-04-15	0	1	-3	-0.7	4.28571	-0.452447	614.667	-186	50.811	-15.376	-0.3	-0.831025	1.85714	-0.447475
1825300	1514481	Germany	female	neutered	2006-06-01	Maxi	33.7	7	27.77	546	Dry	Satiety Weight Management Dry	2015-03-16	4	2015-05-15	1	1	-2	-2.4	8.57143	-0.775623	614.667	-186	50.811	-15.376	-1.7	-4.70914	4.28571	-1.0988
1825300	1514481	Germany	female	neutered	2006-06-01	Maxi	32.3	7	27.77	493	Dry	Satiety Weight Management Dry	2015-03-16	5	2015-06-11	1	1	-2	-3.8	12.4286	-0.846945	614.667	-186	50.811	-15.376	-1.4	-3.87812	3.85714	-1.00544
1825316	1511545	USA	female	neutered	2009-11-03	Labrador Retriever	38.7825	8	32.3188	821	Dry	Satiety Weight Management Dry	2015-03-16	1	2015-03-16	1	0	-2	0	0	#N/A	821	0	60.569	0	0	0	0
1825316	1511545	USA	female	neutered	2009-11-03	Labrador Retriever	37.6486	8	32.3188	821	Dry	Satiety Weight Management Dry	2015-03-16	2	2015-03-30	0	1	0	-1.13399	2	-1.46199	821	0	60.569	0	-1.13399	-2.92398	2	-1.46199
1825316	1511545	USA	female	neutered	2009-11-03	Labrador Retriever	36.7414	8	32.3188	821	Dry	Satiety Weight Management Dry	2015-03-16	3	2015-04-13	0	0	0	-2.04119	4	-1.31579	821	0	60.569	0	-0.907194	-2.33918	2	-1.16959
1825316	1511545	USA	female	neutered	2009-11-03	Labrador Retriever	34.927	8	32.3188	821	Dry	Satiety Weight Management Dry	2015-03-16	4	2015-05-11	0	0	0	-3.85557	8	-1.24269	821	0	60.569	0	-1.81439	-4.67836	4	-1.16959
1825316	1511545	USA	female	neutered	2009-11-03	Labrador Retriever	33.0219	8	32.3188	821	Dry	Satiety Weight Management Dry	2015-03-16	5	2015-06-08	1	1	-3	-5.76068	12	-1.23782	821	0	60.569	0	-1.90511	-4.91228	4	-1.22807
1825384	1502311	USA	male	neutered	2013-11-11	Labrador Retriever	42.1845	8	32.4503	958	Dry	Satiety Weight Management Dry	2015-03-16	1	2015-03-16	0	1	-3	0	0	#N/A	798	-255	58.693	-18.755	0	0	0
1825384	1502311	USA	male	neutered	2013-11-11	Labrador Retriever	41.3227	8	32.4503	868	Dry	Satiety Weight Management Dry	2015-03-16	2	2015-04-02	1	1	-2	-0.861834	2.42857	-0.84124	798	-255	58.693	-18.755	-0.861834	-2.04301	2.42857	-0.84124
1825384	1502311	USA	male	neutered	2013-11-11	Labrador Retriever	40.8691	8	32.4503	778	Dry	Satiety Weight Management Dry	2015-03-16	3	2015-04-13	1	1	-2	-1.31543	4	-0.77957	798	-255	58.693	-18.755	-0.453597	-1.07527	1.57143	-0.684262
1825384	1502311	USA	male	neutered	2013-11-11	Labrador Retriever	38.964	8	32.4503	703	Dry	Satiety Weight Management Dry	2015-03-16	4	2015-05-14	0	0	-3	-3.22054	8.42857	-0.905777	798	-255	58.693	-18.755	-1.90511	-4.51613	4.42857	-1.01977
1825384	1502311	USA	male	neutered	2013-11-11	Labrador Retriever	37.83	8	32.4503	629	Dry	Satiety Weight Management Dry	2015-03-16	5	2015-06-18	0	0	-2	-4.35453	13.4286	-0.768703	798	-255	58.693	-18.755	-1.13399	-2.68817	5	-0.537634
1825421	1507572	USA	female	neutered	2010-03-05	Pug	9.75234	7	8.12846	292	Dry	Satiety Weight Management Dry	2015-03-16	1	2015-03-16	0	0	-2	0	0	#N/A	245.167	-74	50.928	-15.372	0	0	0
1825421	1507572	USA	female	neutered	2010-03-05	Pug	10.0245	7	8.12846	265	Dry	Satiety Weight Management Dry	2015-03-16	2	2015-04-02	0	1	-2	0.272158	2.42857	1.14911	245.167	-74	50.928	-15.372	0.272158	2.7907	2.42857	1.14911
1825421	1507572	USA	female	neutered	2010-03-05	Pug	9.52554	7	8.12846	239	Dry	Satiety Weight Management Dry	2015-03-16	3	2015-04-17	0	0	-3	-0.226799	4.57143	-0.508721	245.167	-74	50.928	-15.372	-0.498957	-5.11628	2.14286	-2.3876
1825421	1507572	USA	female	neutered	2010-03-05	Pug	9.3441	7	8.12846	218	Dry	Satiety Weight Management Dry	2015-03-16	4	2015-05-18	0	0	0	-0.408237	9	-0.465116	245.167	-74	50.928	-15.372	-0.181439	-1.86047	4.42857	-0.420105
1825421	1507572	USA	female	neutered	2010-03-05	Pug	9.29874	7	8.12846	196	Dry	Satiety Weight Management Dry	2015-03-16	5	2015-06-17	1	1	-1	-0.453597	13.2857	-0.350088	245.167	-74	50.928	-15.372	-0.0453597	-0.465116	4.28571	-0.108527
1825469	1512717	Germany	male	neutered	2008-03-17	Golden Retriever	50	8	41.67	1155	Dry	Satiety Weight Management Dry	2015-03-17	1	2015-03-17	0	0	0	0	0	#N/A	962.667	-307	58.696	-18.718	0	0	0
1825469	1512717	Germany	male	neutered	2008-03-17	Golden Retriever	50	8	41.67	1047	Dry	Satiety Weight Management Dry	2015-03-17	2	2015-03-25	-1	0	0	0	1.14286	0	962.667	-307	58.696	-18.718	0	0	1.14286	0
1825469	1512717	Germany	male	neutered	2008-03-17	Golden Retriever	49	8	41.67	939	Dry	Satiety Weight Management Dry	2015-03-17	3	2015-04-08	0	0	0	-1	3.14286	-0.636364	962.667	-307	58.696	-18.718	-1	-2	2	-1
1825469	1512717	Germany	male	neutered	2008-03-17	Golden Retriever	47.2	8	41.67	848	Dry	Satiety Weight Management Dry	2015-03-17	4	2015-05-06	0	0	0	-2.8	7.14286	-0.784	962.667	-307	58.696	-18.718	-1.8	-3.6	4	-0.9
1825469	1512717	Germany	male	neutered	2008-03-17	Golden Retriever	45.4	8	41.67	758	Dry	Satiety Weight Management Dry	2015-03-17	5	2015-06-03	1	1	0	-4.6	11.1429	-0.825641	962.667	-307	58.696	-18.718	-1.8	-3.6	4	-0.9
1825493	1510444	Germany	female	neutered	2011-07-01	Medium	17.2	7	13.23	420	Dry	Satiety Weight Management Dry	2015-03-17	1	2015-03-17	0	0	-2	0	0	#N/A	388.333	-38	55.98	-5.478	0	0	0
1825493	1510444	Germany	female	neutered	2011-07-01	Medium	16.9	7	13.23	382	Dry	Satiety Weight Management Dry	2015-03-17	2	2015-03-31	1	1	0	-0.3	2	-0.872093	388.333	-38	55.98	-5.478	-0.3	-1.74419	2	-0.872093
1825493	1510444	Germany	female	neutered	2011-07-01	Medium	16.3	7	13.23	382	Dry	Satiety Weight Management Dry	2015-03-17	3	2015-04-14	-1	-1	-1	-0.9	4	-1.30814	388.333	-38	55.98	-5.478	-0.6	-3.48837	2	-1.74419
1825493	1510444	Germany	female	neutered	2011-07-01	Medium	15.5	7	13.23	382	Dry	Satiety Weight Management Dry	2015-03-17	4	2015-05-19	1	1	0	-1.7	9	-1.09819	388.333	-38	55.98	-5.478	-0.8	-4.65116	5	-0.930233
1825493	1510444	Germany	female	neutered	2011-07-01	Medium	15	7	13.23	344	Dry	Satiety Weight Management Dry	2015-03-17	5	2015-06-16	1	1	0	-2.2	13	-0.9839	388.333	-38	55.98	-5.478	-0.5	-2.90698	4	-0.726744
1825512	1512717	Germany	female	intact	2010-03-17	Labrador	32.4	9	27	834	Dry	Satiety Weight Management Dry	2015-03-17	1	2015-03-17	1	1	0	0	0	#N/A	695.333	-221	58.704	-18.658	0	0	0
1825512	1512717	Germany	female	intact	2010-03-17	Labrador	32.4	9	27	756	Dry	Satiety Weight Management Dry	2015-03-17	2	2015-04-10	0	0	0	0	3.42857	0	695.333	-221	58.704	-18.658	0	0	3.42857	0
1825512	1512717	Germany	female	intact	2010-03-17	Labrador	31.5	9	27	678	Dry	Satiety Weight Management Dry	2015-03-17	3	2015-04-24	1	1	0	-0.9	5.42857	-0.511696	695.333	-221	58.704	-18.658	-0.9	-2.77778	2	-1.38889
1825512	1512717	Germany	female	intact	2010-03-17	Labrador	31.2	9	27	613	Dry	Satiety Weight Management Dry	2015-03-17	4	2015-05-08	1	0	-3	-1.2	7.42857	-0.498575	695.333	-221	58.704	-18.658	-0.3	-0.925926	2	-0.462963
1825512	1512717	Germany	female	intact	2010-03-17	Labrador	29.6	9	27	548	Dry	Satiety Weight Management Dry	2015-03-17	5	2015-06-19	1	1	0	-2.8	13.4286	-0.643551	695.333	-221	58.704	-18.658	-1.6	-4.93827	6	-0.823045
1825521	1502827	Germany	female	neutered	2008-05-22	Bull Terrier	17.6	8	14.67	454	Dry	Satiety Weight Management Dry	2015-03-17	1	2015-03-17	1	1	-2	0	0	#N/A	454	0	60.567	0	0	0	0
1825521	1502827	Germany	female	neutered	2008-05-22	Bull Terrier	16.5	8	14.67	454	Dry	Satiety Weight Management Dry	2015-03-17	2	2015-04-13	0	1	-1	-1.1	3.85714	-1.62037	454	0	60.567	0	-1.1	-6.25	3.85714	-1.62037
1825521	1502827	Germany	female	neutered	2008-05-22	Bull Terrier	15	8	14.67	454	Dry	Satiety Weight Management Dry	2015-03-17	3	2015-04-28	1	1	-1	-2.6	6	-2.46212	454	0	60.567	0	-1.5	-8.52273	2.14286	-3.97727
1825521	1502827	Germany	female	neutered	2008-05-22	Bull Terrier	14.9	8	14.67	454	Dry	Satiety Weight Management Dry	2015-03-17	4	2015-05-11	1	1	-1	-2.7	7.85714	-1.95248	454	0	60.567	0	-0.1	-0.568182	1.85714	-0.305944
1825521	1502827	Germany	female	neutered	2008-05-22	Bull Terrier	14.5	8	14.67	454	Dry	Satiety Weight Management Dry	2015-03-17	5	2015-06-12	1	1	-1	-3.1	12.4286	-1.41719	454	0	60.567	0	-0.4	-2.27273	4.57143	-0.497159
1825659	1510430	Germany	female	intact	2009-03-17	Maxi	42	7	30	903	Dry	Satiety Weight Management Dry	2015-03-17	1	2015-03-17	0	-1	-3	0	0	#N/A	832.167	-85	64.919	-6.631	0	0	0
1825659	1510430	Germany	female	intact	2009-03-17	Maxi	40.8	7	30	818	Dry	Satiety Weight Management Dry	2015-03-17	2	2015-04-08	0	0	-3	-1.2	3.14286	-0.909091	832.167	-85	64.919	-6.631	-1.2	-2.85714	3.14286	-0.909091
1825659	1510430	Germany	female	intact	2009-03-17	Maxi	36	7	30	818	Dry	Satiety Weight Management Dry	2015-03-17	3	2015-04-22	0	0	-3	-6	5.14286	-2.77778	832.167	-85	64.919	-6.631	-4.8	-11.4286	2	-5.71429
1825659	1510430	Germany	female	intact	2009-03-17	Maxi	33.2	7	30	818	Dry	Satiety Weight Management Dry	2015-03-17	4	2015-05-05	-1	0	-3	-8.8	7	-2.9932	832.167	-85	64.919	-6.631	-2.8	-6.66667	1.85714	-3.58974
1825659	1510430	Germany	female	intact	2009-03-17	Maxi	30.2	7	30	818	Dry	Satiety Weight Management Dry	2015-03-17	5	2015-06-12	0	0	-2	-11.8	12.4286	-2.26054	832.167	-85	64.919	-6.631	-3	-7.14286	5.42857	-1.31579
1826021	1512747	USA	female	neutered	2007-11-18	Maxi	40.098	8	33.4165	841	Dry	Satiety Weight Management Dry	2015-03-17	1	2015-03-17	1	0	-2	0	0	#N/A	701	-229	50.437	-16.476	0	0	0
1826021	1512747	USA	female	neutered	2007-11-18	Maxi	39.6444	8	33.4165	765	Dry	Satiety Weight Management Dry	2015-03-17	2	2015-03-31	1	0	-2	-0.453597	2	-0.565611	701	-229	50.437	-16.476	-0.453597	-1.13122	2	-0.565611
1826021	1512747	USA	female	neutered	2007-11-18	Maxi	40.098	8	33.4165	688	Dry	Satiety Weight Management Dry	2015-03-17	3	2015-04-14	1	0	-1	0	4	0	701	-229	50.437	-16.476	0.453597	1.13122	2	0.565611
1826021	1512747	USA	female	neutered	2007-11-18	Maxi	39.4629	8	33.4165	612	Dry	Satiety Weight Management Dry	2015-03-17	4	2015-05-12	1	0	-1	-0.635036	8	-0.197964	701	-229	50.437	-16.476	-0.635036	-1.58371	4	-0.395928
1826021	1512747	USA	female	neutered	2007-11-18	Maxi	39.0547	8	33.4165	551	Dry	Satiety Weight Management Dry	2015-03-17	5	2015-06-12	1	1	-1	-1.04327	12.4286	-0.209341	701	-229	50.437	-16.476	-0.408237	-1.0181	4.42857	-0.229893
1826194	1492891	USA	female	neutered	2011-11-16	Poodle	4.67205	7	3.59249	158	Mix feeding	wet product : Satiety Weight Management Canine / dry product : Satiety Small Dog	2015-03-17	1	2015-03-17	-1	0	0	0	0	#N/A	143.833	-17	55.12	-6.515	0	0	0
1826194	1492891	USA	female	neutered	2011-11-16	Poodle	4.62669	7	3.59249	141	Mix feeding	wet product : Satiety Weight Management Canine / dry product : Satiety Small Dog	2015-03-17	2	2015-03-31	-1	1	0	-0.0453597	2	-0.485437	143.833	-17	55.12	-6.515	-0.0453597	-0.970874	2	-0.485437
1826194	1492891	USA	female	neutered	2011-11-16	Poodle	4.26381	7	3.59249	141	Mix feeding	wet product : Satiety Weight Management Canine / dry product : Satiety Small Dog	2015-03-17	3	2015-04-14	0	1	0	-0.408237	4	-2.18447	143.833	-17	55.12	-6.515	-0.362878	-7.76699	2	-3.8835
1826194	1492891	USA	female	neutered	2011-11-16	Poodle	3.85557	7	3.59249	141	Mix feeding	wet product : Satiety Weight Management Canine / dry product : Satiety Small Dog	2015-03-17	4	2015-05-19	0	1	0	-0.816475	9	-1.94175	143.833	-17	55.12	-6.515	-0.408237	-8.73786	5	-1.74757
1826194	1492891	USA	female	neutered	2011-11-16	Poodle	3.67414	7	3.59249	222	Mix feeding	wet product : Satiety Weight Management Canine / dry product : Satiety Small Dog	2015-03-17	5	2015-06-17	-1	1	0	-0.997913	13.1429	-1.62516	143.833	-17	55.12	-6.515	-0.181439	-3.8835	4.14286	-0.937395
1826325	1492467	Italy	female	intact	2008-03-17	Bassotto Tedesco	12.5	8	8.93	364	Dry	Satiety Weight Management Dry	2015-03-17	1	2015-03-17	0	0	-2	0	0	#N/A	364	0	70.463	0	0	0	0
1826325	1492467	Italy	female	intact	2008-03-17	Bassotto Tedesco	11.8	8	8.93	364	Dry	Satiety Weight Management Dry	2015-03-17	2	2015-04-03	-1	1	-1	-0.7	2.42857	-2.30588	364	0	70.463	0	-0.7	-5.6	2.42857	-2.30588
1826325	1492467	Italy	female	intact	2008-03-17	Bassotto Tedesco	10.9	8	8.93	364	Dry	Satiety Weight Management Dry	2015-03-17	3	2015-04-23	0	1	0	-1.6	5.28571	-2.42162	364	0	70.463	0	-0.9	-7.2	2.85714	-2.52
1826325	1492467	Italy	female	intact	2008-03-17	Bassotto Tedesco	10.88	8	8.93	364	Dry	Satiety Weight Management Dry	2015-03-17	4	2015-05-23	0	1	-1	-1.62	9.57143	-1.35403	364	0	70.463	0	-0.02	-0.16	4.28571	-0.0373333
1826325	1492467	Italy	female	intact	2008-03-17	Bassotto Tedesco	9.9	8	8.93	364	Dry	Satiety Weight Management Dry	2015-03-17	5	2015-06-19	0	1	0	-2.6	13.4286	-1.54894	364	0	70.463	0	-0.98	-7.84	3.85714	-2.03259
1826418	1509394	Spain	female	intact	2004-05-01	West Highland White Terrier	9.2	7	7.08	306	Dry	Satiety Weight Management Dry	2015-03-17	1	2015-03-17	-1	-1	-3	0	0	#N/A	255.167	-81	58.789	-18.662	0	0	0
1826418	1509394	Spain	female	intact	2004-05-01	West Highland White Terrier	9.55	7	7.08	277	Dry	Satiety Weight Management Dry	2015-03-17	2	2015-03-31	0	0	-1	0.35	2	1.90217	255.167	-81	58.789	-18.662	0.35	3.80435	2	1.90217
1826418	1509394	Spain	female	intact	2004-05-01	West Highland White Terrier	9.25	7	7.08	249	Dry	Satiety Weight Management Dry	2015-03-17	3	2015-04-23	0	0	-1	0.05	5.28571	0.10282	255.167	-81	58.789	-18.662	-0.3	-3.26087	3.28571	-0.992439
1826418	1509394	Spain	female	intact	2004-05-01	West Highland White Terrier	8.9	7	7.08	225	Dry	Satiety Weight Management Dry	2015-03-17	4	2015-05-26	0	0	-1	-0.3	10	-0.326087	255.167	-81	58.789	-18.662	-0.35	-3.80435	4.71429	-0.806983
1826418	1509394	Spain	female	intact	2004-05-01	West Highland White Terrier	9.2	7	7.08	206	Dry	Satiety Weight Management Dry	2015-03-17	5	2015-05-29	0	0	-1	0	10.4286	0	255.167	-81	58.789	-18.662	0.3	3.26087	0.428571	7.6087
1826443	1492891	USA	female	neutered	2008-10-30	Golden Retriever	36.8321	7	28.3317	743	Dry	Satiety Weight Management Dry	2015-03-17	1	2015-03-17	-1	0	-1	0	0	#N/A	720.667	-67	58.685	-5.456	0	0	0
1826443	1492891	USA	female	neutered	2008-10-30	Golden Retriever	35.8795	7	28.3317	743	Dry	Satiety Weight Management Dry	2015-03-17	2	2015-04-02	0	0	0	-0.952554	2.28571	-1.13147	720.667	-67	58.685	-5.456	-0.952554	-2.58621	2.28571	-1.13147
1826443	1492891	USA	female	neutered	2008-10-30	Golden Retriever	35.2445	7	28.3317	743	Dry	Satiety Weight Management Dry	2015-03-17	3	2015-04-15	0	0	0	-1.58759	4.14286	-1.04043	720.667	-67	58.685	-5.456	-0.635036	-1.72414	1.85714	-0.928382
1826443	1492891	USA	female	neutered	2008-10-30	Golden Retriever	34.6548	7	28.3317	676	Dry	Satiety Weight Management Dry	2015-03-17	4	2015-05-14	0	0	0	-2.17727	8.28571	-0.713436	720.667	-67	58.685	-5.456	-0.589676	-1.60099	4.14286	-0.386445
1826443	1492891	USA	female	neutered	2008-10-30	Golden Retriever	33.1579	7	28.3317	608	Dry	Satiety Weight Management Dry	2015-03-17	5	2015-06-11	0	0	0	-3.67414	12.2857	-0.811949	720.667	-67	58.685	-5.456	-1.49687	-4.06404	4	-1.01601
1826451	1488111	USA	male	neutered	2009-03-17	Golden Retriever	50.8029	7	39.0774	1101	Dry	Satiety Weight Management Dry	2015-03-17	1	2015-03-17	0	1	-1	0	0	#N/A	917.833	-292	58.725	-18.683	0	0	0
1826451	1488111	USA	male	neutered	2009-03-17	Golden Retriever	49.8957	7	39.0774	998	Dry	Satiety Weight Management Dry	2015-03-17	2	2015-04-01	1	1	-1	-0.907194	2.14286	-0.833333	917.833	-292	58.725	-18.683	-0.907194	-1.78571	2.14286	-0.833333
1826451	1488111	USA	male	neutered	2009-03-17	Golden Retriever	49.8957	7	39.0774	895	Dry	Satiety Weight Management Dry	2015-03-17	3	2015-04-15	1	1	-1	-0.907194	4.14286	-0.431034	917.833	-292	58.725	-18.683	0	0	2	0
1826451	1488111	USA	male	neutered	2009-03-17	Golden Retriever	48.0813	7	39.0774	809	Dry	Satiety Weight Management Dry	2015-03-17	4	2015-05-13	1	1	-1	-2.72158	8.14286	-0.657895	917.833	-292	58.725	-18.683	-1.81439	-3.57143	4	-0.892857
1826451	1488111	USA	male	neutered	2009-03-17	Golden Retriever	46.2669	7	39.0774	723	Dry	Satiety Weight Management Dry	2015-03-17	5	2015-06-10	1	1	-1	-4.53597	12.1429	-0.735294	917.833	-292	58.725	-18.683	-1.81439	-3.57143	4	-0.892857
1826471	1511545	USA	female	neutered	2008-03-13	Pug	13.5172	7	10.3964	351	Dry	Satiety Small Dog	2015-03-17	1	2015-03-18	-1	-1	-1	0	0	#N/A	294.667	-89	50.894	-15.372	0	0	0
1826471	1511545	USA	female	neutered	2008-03-13	Pug	14.1976	7	10.3964	319	Dry	Satiety Small Dog	2015-03-17	2	2015-03-31	0	0	0	0.680396	1.85714	2.71038	294.667	-89	50.894	-15.372	0.680396	5.03356	1.85714	2.71038
1826471	1511545	USA	female	neutered	2008-03-13	Pug	13.245	7	10.3964	287	Dry	Satiety Small Dog	2015-03-17	3	2015-04-14	0	0	-1	-0.272158	3.85714	-0.521999	294.667	-89	50.894	-15.372	-0.952554	-7.04698	2	-3.52349
1826471	1511545	USA	female	neutered	2008-03-13	Pug	13.0636	7	10.3964	262	Dry	Satiety Small Dog	2015-03-17	4	2015-05-16	0	0	-1	-0.453597	8.42857	-0.398134	294.667	-89	50.894	-15.372	-0.181439	-1.34228	4.57143	-0.293624
1826471	1511545	USA	female	neutered	2008-03-13	Pug	11.6121	7	10.3964	262	Dry	Satiety Weight Management Dry	2015-03-17	5	2015-06-16	0	0	0	-1.90511	12.8571	-1.0962	294.667	-89	50.894	-15.372	-1.45151	-10.7383	4.42857	-2.42477
1826520	1507104	USA	female	neutered	2010-03-13	Medium	29.1209	7	22.3986	623	Dry	Satiety Weight Management Dry	2015-03-18	1	2015-03-18	0	-1	-3	0	0	#N/A	523.333	-158	50.829	-15.346	0	0	0
1826520	1507104	USA	female	neutered	2010-03-13	Medium	29.3024	7	22.3986	567	Dry	Satiety Weight Management Dry	2015-03-18	2	2015-04-01	0	0	-2	0.181439	2	0.311526	523.333	-158	50.829	-15.346	0.181439	0.623053	2	0.311526
1826520	1507104	USA	female	neutered	2010-03-13	Medium	28.3045	7	22.3986	510	Dry	Satiety Weight Management Dry	2015-03-18	3	2015-04-14	1	0	-1	-0.816475	3.85714	-0.726895	523.333	-158	50.829	-15.346	-0.997913	-3.42679	1.85714	-1.8452
1826520	1507104	USA	female	neutered	2010-03-13	Medium	26.8529	7	22.3986	465	Dry	Satiety Weight Management Dry	2015-03-18	4	2015-05-12	1	1	0	-2.26799	7.85714	-0.991221	523.333	-158	50.829	-15.346	-1.45151	-4.98442	4	-1.24611
1826520	1507104	USA	female	neutered	2010-03-13	Medium	26.4901	7	22.3986	420	Dry	Satiety Weight Management Dry	2015-03-18	5	2015-06-16	1	1	-2	-2.63086	12.8571	-0.702665	523.333	-158	50.829	-15.346	-0.362878	-1.24611	5	-0.249221
1826924	1502313	USA	male	neutered	2009-03-18	Giant	46.2669	9	38.5557	1090	Dry	Satiety Weight Management Dry	2015-03-18	1	2015-03-18	-1	0	0	0	0	#N/A	988	-204	63.854	-13.184	0	0	0
1826924	1502313	USA	male	neutered	2009-03-18	Giant	45.3143	9	38.5557	1090	Dry	Satiety Weight Management Dry	2015-03-18	2	2015-04-01	0	0	0	-0.952554	2	-1.02941	988	-204	63.854	-13.184	-0.952554	-2.05882	2	-1.02941
1826924	1502313	USA	male	neutered	2009-03-18	Giant	44.5886	9	38.5557	988	Dry	Satiety Weight Management Dry	2015-03-18	3	2015-04-15	0	0	0	-1.67831	4	-0.906863	988	-204	63.854	-13.184	-0.725755	-1.56863	2	-0.784314
1826924	1502313	USA	male	neutered	2009-03-18	Giant	43.7721	9	38.5557	886	Dry	Satiety Weight Management Dry	2015-03-18	4	2015-05-12	0	0	0	-2.49478	7.85714	-0.686275	988	-204	63.854	-13.184	-0.816475	-1.76471	3.85714	-0.457516
1826924	1502313	USA	male	neutered	2009-03-18	Giant	40.9145	9	38.5557	800	Dry	Satiety Weight Management Dry	2015-03-18	5	2015-06-10	0	0	-1	-5.35244	12	-0.964052	988	-204	63.854	-13.184	-2.85766	-6.17647	4.14286	-1.49087
1826950	1502313	USA	female	neutered	2007-03-18	Labrador Retriever	44.9061	7	34.5414	863	Mix feeding	wet product : Satiety Weight Management Canine / dry product : Satiety Weight Management Dry	2015-03-18	1	2015-03-18	1	1	-1	0	0	#N/A	771.167	-157	54.124	-11.019	0	0	0
1826950	1502313	USA	female	neutered	2007-03-18	Labrador Retriever	44.2711	7	34.5414	784	Mix feeding	wet product : Satiety Weight Management Canine / dry product : Satiety Weight Management Dry	2015-03-18	2	2015-04-01	0	0	0	-0.635036	2	-0.707071	771.167	-157	54.124	-11.019	-0.635036	-1.41414	2	-0.707071
1826950	1502313	USA	female	neutered	2007-03-18	Labrador Retriever	43.0464	7	34.5414	784	Dry	Satiety Weight Management Dry	2015-03-18	3	2015-04-15	1	1	0	-1.85975	4	-1.03535	771.167	-157	54.124	-11.019	-1.22471	-2.72727	2	-1.36364
1826950	1502313	USA	female	neutered	2007-03-18	Labrador Retriever	41.8216	7	34.5414	706	Dry	Satiety Weight Management Dry	2015-03-18	4	2015-05-12	-1	0	-1	-3.08446	7.85714	-0.874197	771.167	-157	54.124	-11.019	-1.22471	-2.72727	3.85714	-0.707071
1826950	1502313	USA	female	neutered	2007-03-18	Labrador Retriever	41.0959	7	34.5414	643	Dry	Satiety Weight Management Dry	2015-03-18	5	2015-06-10	0	1	-1	-3.81022	12	-0.707071	771.167	-157	54.124	-11.019	-0.725755	-1.61616	4.14286	-0.390108
1826970	1504877	USA	male	neutered	2008-05-27	Maltese	5.48852	8	4.57226	221	Dry	Satiety Small Dog	2015-03-18	1	2015-03-18	0	0	-2	0	0	#N/A	183.833	-59	58.793	-18.869	0	0	0
1826970	1504877	USA	male	neutered	2008-05-27	Maltese	5.53388	8	4.57226	200	Dry	Satiety Small Dog	2015-03-18	2	2015-04-03	0	0	-1	0.0453597	2.28571	0.36157	183.833	-59	58.793	-18.869	0.0453597	0.826446	2.28571	0.36157
1826970	1504877	USA	male	neutered	2008-05-27	Maltese	5.6246	8	4.57226	179	Dry	Satiety Small Dog	2015-03-18	3	2015-04-17	1	1	0	0.136079	4.28571	0.578512	183.833	-59	58.793	-18.869	0.0907194	1.65289	2	0.826446
1826970	1504877	USA	male	neutered	2008-05-27	Maltese	5.3978	8	4.57226	162	Dry	Satiety Small Dog	2015-03-18	4	2015-05-08	0	0	-3	-0.0907194	7.28571	-0.226868	183.833	-59	58.793	-18.869	-0.226799	-4.13223	3	-1.37741
1826970	1504877	USA	male	neutered	2008-05-27	Maltese	5.21637	8	4.57226	145	Dry	Satiety Small Dog	2015-03-18	5	2015-06-10	0	0	-2	-0.272158	12	-0.413223	183.833	-59	58.793	-18.869	-0.181439	-3.30579	4.71429	-0.701227
1826971	1504877	USA	male	intact	2008-06-27	Labrador Retriever	44.1804	7	36.8185	1201	Dry	Satiety Weight Management Dry	2015-03-18	1	2015-03-18	1	1	-2	0	0	#N/A	1086	-230	72.658	-15.388	0	0	0
1826971	1504877	USA	male	intact	2008-06-27	Labrador Retriever	42.502	7	36.8185	1201	Dry	Satiety Weight Management Dry	2015-03-18	2	2015-04-03	0	1	-1	-1.67831	2.28571	-1.66196	1086	-230	72.658	-15.388	-1.67831	-3.79877	2.28571	-1.66196
1826971	1504877	USA	male	intact	2008-06-27	Labrador Retriever	42.9556	7	36.8185	1086	Dry	Satiety Weight Management Dry	2015-03-18	3	2015-04-17	1	1	0	-1.22471	4.28571	-0.646817	1086	-230	72.658	-15.388	0.453597	1.02669	2	0.513347
1826971	1504877	USA	male	intact	2008-06-27	Labrador Retriever	41.4134	7	36.8185	971	Dry	Satiety Weight Management Dry	2015-03-18	4	2015-05-08	0	1	0	-2.76694	7.28571	-0.859605	1086	-230	72.658	-15.388	-1.54223	-3.49076	3	-1.16359
1826971	1504877	USA	male	intact	2008-06-27	Labrador Retriever	40.5969	7	36.8185	872	Dry	Satiety Weight Management Dry	2015-03-18	5	2015-06-10	0	1	-1	-3.58342	12	-0.675907	1086	-230	72.658	-15.388	-0.816475	-1.84805	4.71429	-0.39201
1827142	1504862	Portugal	male	intact	2007-04-26	Pug	9.7	8	8.08	385	Dry	Satiety Small Dog	2015-03-18	1	2015-03-18	-1	0	0	0	0	#N/A	375.5	-42	78.352	-8.764	0	0	0
1827142	1504862	Portugal	male	intact	2007-04-26	Pug	8.3	8	8.08	422	Dry	Satiety Small Dog	2015-03-18	2	2015-04-14	-1	0	0	-1.4	3.85714	-3.74189	375.5	-42	78.352	-8.764	-1.4	-14.433	3.85714	-3.74189
1827142	1504862	Portugal	male	intact	2007-04-26	Pug	9.25	8	8.08	380	Dry	Satiety Small Dog	2015-03-18	3	2015-04-28	-1	1	0	-0.45	5.85714	-0.792054	375.5	-42	78.352	-8.764	0.95	9.79381	2	4.89691
1827142	1504862	Portugal	male	intact	2007-04-26	Pug	9.1	8	8.08	343	Dry	Satiety Small Dog	2015-03-18	4	2015-05-07	0	0	0	-0.6	7.14286	-0.865979	375.5	-42	78.352	-8.764	-0.15	-1.54639	1.28571	-1.20275
1827142	1504862	Portugal	male	intact	2007-04-26	Pug	9	8	8.08	312	Dry	Satiety Small Dog	2015-03-18	5	2015-06-05	0	0	0	-0.7	11.2857	-0.639436	375.5	-42	78.352	-8.764	-0.1	-1.03093	4.14286	-0.248845
1827170	1502313	USA	female	neutered	2009-03-18	X-SMALL	12.7007	7	10.5824	355	Dry	Satiety Weight Management Dry	2015-03-18	1	2015-03-18	0	1	-1	0	0	#N/A	323	-64	55.051	-10.908	0	0	0
1827170	1502313	USA	female	neutered	2009-03-18	X-SMALL	12.3832	7	10.5824	355	Dry	Satiety Weight Management Dry	2015-03-18	2	2015-04-02	1	1	-1	-0.317518	2.14286	-1.16667	323	-64	55.051	-10.908	-0.317518	-2.5	2.14286	-1.16667
1827170	1502313	USA	female	neutered	2009-03-18	X-SMALL	12.4286	7	10.5824	323	Dry	Satiety Weight Management Dry	2015-03-18	3	2015-04-16	0	0	-1	-0.272158	4.14286	-0.517241	323	-64	55.051	-10.908	0.0453597	0.357143	2	0.178571
1827170	1502313	USA	female	neutered	2009-03-18	X-SMALL	11.7935	7	10.5824	291	Dry	Satiety Weight Management Dry	2015-03-18	4	2015-05-12	1	1	-1	-0.907194	7.85714	-0.909091	323	-64	55.051	-10.908	-0.635036	-5	3.71429	-1.34615
1827170	1502313	USA	female	neutered	2009-03-18	X-SMALL	11.1585	7	10.5824	291	Dry	Satiety Weight Management Dry	2015-03-18	5	2015-06-09	0	0	-1	-1.54223	11.8571	-1.0241	323	-64	55.051	-10.908	-0.635036	-5	4	-1.25
1827231	1488109	USA	female	neutered	2012-01-26	X-SMALL	5.6246	8	4.68566	193	Dry	Satiety Weight Management Dry	2015-03-18	1	2015-03-18	1	1	-1	0	0	#N/A	203.5	0	63.898	0	0	0	0
1827231	1488109	USA	female	neutered	2012-01-26	X-SMALL	5.26173	8	4.68566	214	Dry	Satiety Weight Management Dry	2015-03-18	2	2015-04-01	1	1	-1	-0.362878	2	-3.22581	203.5	0	63.898	0	-0.362878	-6.45161	2	-3.22581
1827231	1488109	USA	female	neutered	2012-01-26	X-SMALL	5.26173	8	4.68566	214	Dry	Satiety Weight Management Dry	2015-03-18	3	2015-04-14	1	1	-1	-0.362878	3.85714	-1.67264	203.5	0	63.898	0	0	0	1.85714	0
1827231	1488109	USA	female	neutered	2012-01-26	X-SMALL	5.21637	8	4.68566	193	Dry	Satiety Weight Management Dry	2015-03-18	4	2015-05-20	1	1	-2	-0.408237	9	-0.806452	203.5	0	63.898	0	-0.0453597	-0.806452	5.14286	-0.15681
1827231	1488109	USA	female	neutered	2012-01-26	X-SMALL	5.08029	8	4.68566	176	Dry	Satiety Weight Management Dry	2015-03-18	5	2015-06-17	1	1	0	-0.544316	13	-0.744417	203.5	0	63.898	0	-0.136079	-2.41935	4	-0.604839
1827237	1488111	USA	male	intact	2012-03-16	Labrador Retriever	48.0813	8	40.0662	1279	Dry	Satiety Weight Management Dry	2015-03-18	1	2015-03-18	1	1	-3	0	0	#N/A	1279	0	80.313	0	0	0	0
1827237	1488111	USA	male	intact	2012-03-16	Labrador Retriever	45.3597	8	40.0662	1279	Dry	Satiety Weight Management Dry	2015-03-18	2	2015-04-01	1	1	-3	-2.72158	2	-2.83019	1279	0	80.313	0	-2.72158	-5.66038	2	-2.83019
1827237	1488111	USA	male	intact	2012-03-16	Labrador Retriever	43.0917	8	40.0662	1279	Dry	Satiety Weight Management Dry	2015-03-18	3	2015-04-15	1	1	-3	-4.98957	4	-2.59434	1279	0	80.313	0	-2.26799	-4.71698	2	-2.35849
1827237	1488111	USA	male	intact	2012-03-16	Labrador Retriever	42.6381	8	40.0662	1279	Dry	Satiety Weight Management Dry	2015-03-18	4	2015-05-13	1	1	-3	-5.44316	8	-1.41509	1279	0	80.313	0	-0.453597	-0.943396	4	-0.235849
1827237	1488111	USA	male	intact	2012-03-16	Labrador Retriever	42.366	8	40.0662	1157	Dry	Satiety Weight Management Dry	2015-03-18	5	2015-06-10	1	1	-3	-5.71532	12	-0.990566	1279	0	80.313	0	-0.272158	-0.566038	4	-0.141509
1827244	1488111	USA	female	neutered	2006-03-15	Labrador Retriever	32.659	8	25.1202	679	Dry	Satiety Weight Management Dry	2015-03-18	1	2015-03-18	-1	0	-2	0	0	#N/A	570.5	-172	50.844	-15.329	0	0	0
1827244	1488111	USA	female	neutered	2006-03-15	Labrador Retriever	33.5662	8	25.1202	618	Dry	Satiety Weight Management Dry	2015-03-18	2	2015-04-01	-1	0	-2	0.907194	2	1.38889	570.5	-172	50.844	-15.329	0.907194	2.77778	2	1.38889
1827244	1488111	USA	female	neutered	2006-03-15	Labrador Retriever	32.8858	8	25.1202	556	Dry	Satiety Weight Management Dry	2015-03-18	3	2015-04-15	-1	0	-2	0.226799	4	0.173611	570.5	-172	50.844	-15.329	-0.680396	-2.08333	2	-1.04167
1827244	1488111	USA	female	neutered	2006-03-15	Labrador Retriever	31.8425	8	25.1202	507	Dry	Satiety Weight Management Dry	2015-03-18	4	2015-05-13	-1	-1	-2	-0.816475	8	-0.3125	570.5	-172	50.844	-15.329	-1.04327	-3.19444	4	-0.798611
1827244	1488111	USA	female	neutered	2006-03-15	Labrador Retriever	31.3889	8	25.1202	457	Dry	Satiety Weight Management Dry	2015-03-18	5	2015-06-10	-1	0	-1	-1.27007	12	-0.324074	570.5	-172	50.844	-15.329	-0.453597	-1.38889	4	-0.347222
1827251	1510434	Germany	male	neutered	2010-07-07	Golden Retriever	45	8	37.5	1067	Dry	Satiety Weight Management Dry	2015-03-18	1	2015-03-18	0	0	-1	0	0	#N/A	889.333	-283	58.687	-18.675	0	0	0
1827251	1510434	Germany	male	neutered	2010-07-07	Golden Retriever	44.4	8	37.5	967	Dry	Satiety Weight Management Dry	2015-03-18	2	2015-04-07	0	0	-1	-0.6	2.85714	-0.466667	889.333	-283	58.687	-18.675	-0.6	-1.33333	2.85714	-0.466667
1827251	1510434	Germany	male	neutered	2010-07-07	Golden Retriever	43.5	8	37.5	867	Dry	Satiety Weight Management Dry	2015-03-18	3	2015-04-21	1	1	-1	-1.5	4.85714	-0.686275	889.333	-283	58.687	-18.675	-0.9	-2	2	-1
1827251	1510434	Germany	male	neutered	2010-07-07	Golden Retriever	42.4	8	37.5	784	Dry	Satiety Weight Management Dry	2015-03-18	4	2015-05-06	1	0	-1	-2.6	7	-0.825397	889.333	-283	58.687	-18.675	-1.1	-2.44444	2.14286	-1.14074
1827251	1510434	Germany	male	neutered	2010-07-07	Golden Retriever	40.9	8	37.5	701	Dry	Satiety Weight Management Dry	2015-03-18	5	2015-06-03	1	1	0	-4.1	11	-0.828283	889.333	-283	58.687	-18.675	-1.5	-3.33333	4	-0.833333
1827278	1488111	USA	male	neutered	2009-03-16	Labrador Retriever	49.4421	7	35.3171	1020	Dry	Satiety Weight Management Dry	2015-03-18	1	2015-03-18	0	0	-2	0	0	#N/A	988.333	-95	68.221	-6.557	0	0	0
1827278	1488111	USA	male	neutered	2009-03-16	Labrador Retriever	48.0813	7	35.3171	1020	Dry	Satiety Weight Management Dry	2015-03-18	2	2015-04-01	1	0	-2	-1.36079	2	-1.37615	988.333	-95	68.221	-6.557	-1.36079	-2.75229	2	-1.37615
1827278	1488111	USA	male	neutered	2009-03-16	Labrador Retriever	46.2669	7	35.3171	1020	Dry	Satiety Weight Management Dry	2015-03-18	3	2015-04-15	1	0	-1	-3.17518	4	-1.6055	988.333	-95	68.221	-6.557	-1.81439	-3.66972	2	-1.83486
1827278	1488111	USA	male	neutered	2009-03-16	Labrador Retriever	45.8133	7	35.3171	925	Dry	Satiety Weight Management Dry	2015-03-18	4	2015-05-13	1	1	-1	-3.62878	8	-0.917431	988.333	-95	68.221	-6.557	-0.453597	-0.917431	4	-0.229358
1827278	1488111	USA	male	neutered	2009-03-16	Labrador Retriever	41.5041	7	35.3171	925	Dry	Satiety Weight Management Dry	2015-03-18	5	2015-06-10	1	0	-1	-7.93795	12	-1.33792	988.333	-95	68.221	-6.557	-4.30917	-8.7156	4	-2.1789
1827361	1220315	Italy	female	intact	2010-03-19	Beagle	19.5	9	15	537	Dry	Satiety Weight Management Dry	2015-03-19	1	2015-03-19	-1	-1	-3	0	0	#N/A	537	0	70.454	0	0	0	0
1827361	1220315	Italy	female	intact	2010-03-19	Beagle	18.5	9	15	537	Dry	Satiety Small Dog	2015-03-19	2	2015-04-03	0	0	-2	-1	2.14286	-2.39316	537	0	70.454	0	-1	-5.12821	2.14286	-2.39316
1827361	1220315	Italy	female	intact	2010-03-19	Beagle	18.2	9	15	537	Dry	Satiety Small Dog	2015-03-19	3	2015-04-17	1	1	-1	-1.3	4.14286	-1.6092	537	0	70.454	0	-0.3	-1.53846	2	-0.769231
1827361	1220315	Italy	female	intact	2010-03-19	Beagle	17.55	9	15	537	Dry	Satiety Small Dog	2015-03-19	4	2015-05-14	1	1	-1	-1.95	8	-1.25	537	0	70.454	0	-0.65	-3.33333	3.85714	-0.864198
1827361	1220315	Italy	female	intact	2010-03-19	Beagle	16.95	9	15	537	Dry	Satiety Small Dog	2015-03-19	5	2015-06-04	1	0	-1	-2.55	11	-1.18881	537	0	70.454	0	-0.6	-3.07692	3	-1.02564
1827367	1516229	Germany	female	neutered	2012-07-04	German Shepherd Dog	32.8	9	27.33	724	Mix feeding	wet product : Satiety Weight Management Canine / dry product : Satiety Weight Management Dry	2015-03-19	1	2015-03-19	0	0	-1	0	0	#N/A	607.667	-184	50.838	-15.394	0	0	0
1827367	1516229	Germany	female	neutered	2012-07-04	German Shepherd Dog	32.3	9	27.33	658	Mix feeding	wet product : Satiety Weight Management Canine / dry product : Satiety Weight Management Dry	2015-03-19	2	2015-04-02	0	0	-1	-0.5	2	-0.762195	607.667	-184	50.838	-15.394	-0.5	-1.52439	2	-0.762195
1827367	1516229	Germany	female	neutered	2012-07-04	German Shepherd Dog	31.65	9	27.33	592	Mix feeding	wet product : Satiety Weight Management Canine / dry product : Satiety Weight Management Dry	2015-03-19	3	2015-04-15	0	0	-1	-1.15	3.85714	-0.908988	607.667	-184	50.838	-15.394	-0.65	-1.98171	1.85714	-1.06707
1827367	1516229	Germany	female	neutered	2012-07-04	German Shepherd Dog	29.9	9	27.33	540	Mix feeding	wet product : Satiety Weight Management Canine / dry product : Satiety Weight Management Dry	2015-03-19	4	2015-05-28	0	0	-1	-2.9	10	-0.884146	607.667	-184	50.838	-15.394	-1.75	-5.33537	6.14286	-0.868548
1827367	1516229	Germany	female	neutered	2012-07-04	German Shepherd Dog	28.6	9	27.33	487	Mix feeding	wet product : Satiety Weight Management Canine / dry product : Satiety Weight Management Dry	2015-03-19	5	2015-06-25	0	0	-1	-4.2	14	-0.914634	607.667	-184	50.838	-15.394	-1.3	-3.96341	4	-0.990854
1827370	1516229	Germany	male	neutered	2012-07-19	MINI	7.1	9	5.46	252	Mix feeding	wet product : Satiety Weight Management Canine / dry product : Satiety Small Dog	2015-03-19	1	2015-03-19	0	0	-2	0	0	#N/A	295.833	63	82.823	17.638	0	0	0
1827370	1516229	Germany	male	neutered	2012-07-19	MINI	6.6	9	5.46	279	Mix feeding	wet product : Satiety Weight Management Canine / dry product : Satiety Small Dog	2015-03-19	2	2015-04-02	0	1	0	-0.5	2	-3.52113	295.833	63	82.823	17.638	-0.5	-7.04225	2	-3.52113
1827370	1516229	Germany	male	neutered	2012-07-19	MINI	6.1	9	5.46	307	Mix feeding	wet product : Satiety Weight Management Canine / dry product : Satiety Small Dog	2015-03-19	3	2015-04-15	1	1	0	-1	3.85714	-3.65154	295.833	63	82.823	17.638	-0.5	-7.04225	1.85714	-3.79198
1827370	1516229	Germany	male	neutered	2012-07-19	MINI	5.45	9	5.46	315	Mix feeding	wet product : Satiety Weight Management Canine / dry product : Satiety Small Dog	2015-03-19	4	2015-05-06	1	1	0	-1.65	6.85714	-3.38908	295.833	63	82.823	17.638	-0.65	-9.15493	3	-3.05164
1827370	1516229	Germany	male	neutered	2012-07-19	MINI	6	9	5.46	315	Dry	Satiety Small Dog	2015-03-19	5	2015-06-09	1	1	0	-1.1	11.7143	-1.32257	295.833	63	82.823	17.638	0.55	7.74648	4.85714	1.59486
1827407	1205447	Italy	female	neutered	2011-03-19	Medium	16	8	11.43	377	Dry	Satiety Weight Management Dry	2015-03-19	1	2015-03-19	0	0	-3	0	0	#N/A	365.333	-35	58.77	-5.63	0	0	0
1827407	1205447	Italy	female	neutered	2011-03-19	Medium	15.6	8	11.43	377	Dry	Satiety Weight Management Dry	2015-03-19	2	2015-04-04	0	0	-3	-0.4	2.28571	-1.09375	365.333	-35	58.77	-5.63	-0.4	-2.5	2.28571	-1.09375
1827407	1205447	Italy	female	neutered	2011-03-19	Medium	14.9	8	11.43	377	Dry	Satiety Weight Management Dry	2015-03-19	3	2015-04-19	0	0	-3	-1.1	4.42857	-1.55242	365.333	-35	58.77	-5.63	-0.7	-4.375	2.14286	-2.04167
1827407	1205447	Italy	female	neutered	2011-03-19	Medium	14.5	8	11.43	342	Dry	Satiety Weight Management Dry	2015-03-19	4	2015-05-24	0	0	-3	-1.5	9.42857	-0.994318	365.333	-35	58.77	-5.63	-0.4	-2.5	5	-0.5
1827407	1205447	Italy	female	neutered	2011-03-19	Medium	11.9	8	11.43	342	Dry	Satiety Weight Management Dry	2015-03-19	5	2015-06-19	0	0	-1	-4.1	13.1429	-1.94973	365.333	-35	58.77	-5.63	-2.6	-16.25	3.71429	-4.375
1827595	767632	Netherlands	male	intact	2010-03-19	Golden Retriever	47	8	36.15	1184	Dry	Satiety Weight Management Dry	2015-03-20	1	2015-03-20	0	1	-2	0	0	#N/A	1013.83	-227	68.768	-15.397	0	0	0
1827595	767632	Netherlands	male	intact	2010-03-19	Golden Retriever	46.6	8	36.15	1071	Dry	Satiety Weight Management Dry	2015-03-20	2	2015-04-04	0	0	-1	-0.4	2.14286	-0.397163	1013.83	-227	68.768	-15.397	-0.4	-0.851064	2.14286	-0.397163
1827595	767632	Netherlands	male	intact	2010-03-19	Golden Retriever	45.2	8	36.15	957	Dry	Satiety Weight Management Dry	2015-03-20	3	2015-04-25	0	1	-1	-1.8	5.14286	-0.744681	1013.83	-227	68.768	-15.397	-1.4	-2.97872	3	-0.992908
1827595	767632	Netherlands	male	intact	2010-03-19	Golden Retriever	43.6	8	36.15	957	Dry	Satiety Weight Management Dry	2015-03-20	4	2015-05-09	1	1	0	-3.4	7.14286	-1.01277	1013.83	-227	68.768	-15.397	-1.6	-3.40426	2	-1.70213
1827595	767632	Netherlands	male	intact	2010-03-19	Golden Retriever	40.6	8	36.15	957	Dry	Satiety Weight Management Dry	2015-03-20	5	2015-06-13	1	1	0	-6.4	12.1429	-1.1214	1013.83	-227	68.768	-15.397	-3	-6.38298	5	-1.2766
1828468	1508580	Germany	female	neutered	2008-04-15	Yorkshire Terrier	11.15	7	9.29	322	Mix feeding	wet product : Satiety Weight Management Canine / dry product : Satiety Small Dog	2015-03-19	1	2015-03-19	0	0	-3	0	0	#N/A	322	0	60.512	0	0	0	0
1828468	1508580	Germany	female	neutered	2008-04-15	Yorkshire Terrier	10.25	7	9.29	322	Mix feeding	wet product : Satiety Weight Management Canine / dry product : Satiety Small Dog	2015-03-19	2	2015-04-08	0	1	-3	-0.9	2.85714	-2.82511	322	0	60.512	0	-0.9	-8.07175	2.85714	-2.82511
1828468	1508580	Germany	female	neutered	2008-04-15	Yorkshire Terrier	10	7	9.29	322	Mix feeding	wet product : Satiety Weight Management Canine / dry product : Satiety Small Dog	2015-03-19	3	2015-04-29	1	1	-3	-1.15	5.85714	-1.76091	322	0	60.512	0	-0.25	-2.24215	3	-0.747384
1828468	1508580	Germany	female	neutered	2008-04-15	Yorkshire Terrier	9.73	7	9.29	322	Mix feeding	wet product : Satiety Weight Management Canine / dry product : Satiety Small Dog	2015-03-19	4	2015-05-13	1	1	-3	-1.42	7.85714	-1.62087	322	0	60.512	0	-0.27	-2.42152	2	-1.21076
1828468	1508580	Germany	female	neutered	2008-04-15	Yorkshire Terrier	9.65	7	9.29	293	Mix feeding	wet product : Satiety Weight Management Canine / dry product : Satiety Small Dog	2015-03-19	5	2015-06-01	1	1	-3	-1.5	10.5714	-1.27257	322	0	60.512	0	-0.08	-0.717489	2.71429	-0.264338
1828716	1488111	USA	female	neutered	2007-03-16		34.5641	9	28.8034	753	Dry	Satiety Weight Management Dry	2015-03-19	1	2015-03-19	1	1	-3	0	0	#N/A	684.333	-137	55.041	-11.019	0	0	0
1828716	1488111	USA	female	neutered	2007-03-16		33.8837	9	28.8034	753	Dry	Satiety Weight Management Dry	2015-03-19	2	2015-04-01	0	1	0	-0.680396	1.85714	-1.05996	684.333	-137	55.041	-11.019	-0.680396	-1.9685	1.85714	-1.05996
1828716	1488111	USA	female	neutered	2007-03-16		34.0198	9	28.8034	684	Dry	Satiety Weight Management Dry	2015-03-19	3	2015-04-15	-1	1	0	-0.544316	3.85714	-0.408282	684.333	-137	55.041	-11.019	0.136079	0.393701	2	0.19685
1828716	1488111	USA	female	neutered	2007-03-16		33.1126	9	28.8034	616	Dry	Satiety Weight Management Dry	2015-03-19	4	2015-05-13	-1	1	-1	-1.45151	7.85714	-0.534479	684.333	-137	55.041	-11.019	-0.907194	-2.62467	4	-0.656168
1828716	1488111	USA	female	neutered	2007-03-16		31.8425	9	28.8034	561	Dry	Satiety Weight Management Dry	2015-03-19	5	2015-06-10	1	1	0	-2.72158	11.8571	-0.664074	684.333	-137	55.041	-11.019	-1.27007	-3.67454	4	-0.918635
1828724	1492891	USA	female	neutered	2007-10-14	Jack Russell Terrier	6.98539	8	5.37512	214	Dry	Satiety Weight Management Dry	2015-03-19	1	2015-03-19	1	1	0	0	0	#N/A	184.833	-39	52.359	-11.048	0	0	0
1828724	1492891	USA	female	neutered	2007-10-14	Jack Russell Terrier	7.07611	8	5.37512	195	Dry	Satiety Weight Management Dry	2015-03-19	2	2015-04-03	1	1	-1	0.0907194	2.14286	0.606061	184.833	-39	52.359	-11.048	0.0907194	1.2987	2.14286	0.606061
1828724	1492891	USA	female	neutered	2007-10-14	Jack Russell Terrier	6.98539	8	5.37512	175	Dry	Satiety Weight Management Dry	2015-03-19	3	2015-04-17	0	1	0	0	4.14286	0	184.833	-39	52.359	-11.048	-0.0907194	-1.2987	2	-0.649351
1828724	1492891	USA	female	neutered	2007-10-14	Jack Russell Terrier	6.35036	8	5.37512	175	Dry	Satiety Weight Management Dry	2015-03-19	4	2015-05-15	1	1	0	-0.635036	8.14286	-1.11643	184.833	-39	52.359	-11.048	-0.635036	-9.09091	4	-2.27273
1828724	1492891	USA	female	neutered	2007-10-14	Jack Russell Terrier	6.12356	8	5.37512	175	Dry	Satiety Weight Management Dry	2015-03-19	5	2015-06-10	1	1	-1	-0.861834	11.8571	-1.04053	184.833	-39	52.359	-11.048	-0.226799	-3.24675	3.71429	-0.874126
1828725	1492891	USA	male	neutered	2007-04-06	Jack Russell Terrier	7.57507	7	5.82872	265	Dry	Satiety Weight Management Dry	2015-03-19	1	2015-03-19	0	1	0	0	0	#N/A	227.5	-50	60.646	-13.329	0	0	0
1828725	1492891	USA	male	neutered	2007-04-06	Jack Russell Terrier	7.52971	7	5.82872	240	Dry	Satiety Weight Management Dry	2015-03-19	2	2015-04-03	1	1	-1	-0.0453597	2.14286	-0.279441	227.5	-50	60.646	-13.329	-0.0453597	-0.598802	2.14286	-0.279441
1828725	1492891	USA	male	neutered	2007-04-06	Jack Russell Terrier	7.71115	7	5.82872	215	Dry	Satiety Weight Management Dry	2015-03-19	3	2015-04-17	1	1	0	0.136079	4.14286	0.433616	227.5	-50	60.646	-13.329	0.181439	2.39521	2	1.1976
1828725	1492891	USA	male	neutered	2007-04-06	Jack Russell Terrier	6.94003	7	5.82872	215	Dry	Satiety Weight Management Dry	2015-03-19	4	2015-05-15	1	1	0	-0.635036	8.14286	-1.02952	227.5	-50	60.646	-13.329	-0.771115	-10.1796	4	-2.54491
1828725	1492891	USA	male	neutered	2007-04-06	Jack Russell Terrier	6.84932	7	5.82872	194	Dry	Satiety Weight Management Dry	2015-03-19	5	2015-06-10	0	0	-1	-0.725755	11.8571	-0.808023	227.5	-50	60.646	-13.329	-0.0907194	-1.1976	3.71429	-0.322432
1828728	1511545	USA	female	neutered	2008-03-17	Medium	31.2982	8	22.3578	623	Mix feeding	wet product : Satiety Weight Management Canine / dry product : Satiety Weight Management Dry	2015-03-19	1	2015-03-19	-1	-1	-1	0	0	#N/A	604	-57	58.744	-5.544	0	0	0
1828728	1511545	USA	female	neutered	2008-03-17	Medium	30.0281	8	22.3578	623	Mix feeding	wet product : Satiety Weight Management Canine / dry product : Satiety Weight Management Dry	2015-03-19	2	2015-04-02	0	0	-1	-1.27007	2	-2.02899	604	-57	58.744	-5.544	-1.27007	-4.05797	2	-2.02899
1828728	1511545	USA	female	neutered	2008-03-17	Medium	29.9374	8	22.3578	623	Mix feeding	wet product : Satiety Weight Management Canine / dry product : Satiety Weight Management Dry	2015-03-19	3	2015-04-16	1	1	0	-1.36079	4	-1.08696	604	-57	58.744	-5.544	-0.0907194	-0.289855	2	-0.144928
1828728	1511545	USA	female	neutered	2008-03-17	Medium	29.257	8	22.3578	566	Mix feeding	wet product : Satiety Weight Management Canine / dry product : Satiety Weight Management Dry	2015-03-19	4	2015-05-14	1	0	0	-2.04119	8	-0.815217	604	-57	58.744	-5.544	-0.680396	-2.17391	4	-0.543478
1828728	1511545	USA	female	neutered	2008-03-17	Medium	27.5787	8	22.3578	509	Mix feeding	wet product : Satiety Weight Management Canine / dry product : Satiety Weight Management Dry	2015-03-19	5	2015-06-11	1	1	0	-3.7195	12	-0.990338	604	-57	58.744	-5.544	-1.67831	-5.36232	4	-1.34058
1828740	1511545	USA	male	neutered	2009-03-14	Bichon Frise	10.7956	7	8.30536	345	Mix feeding	wet product : Satiety Weight Management Canine / dry product : Satiety Small Dog	2015-03-20	1	2015-03-20	-1	-1	-1	0	0	#N/A	345	0	70.518	0	0	0	0
1828740	1511545	USA	male	neutered	2009-03-14	Bichon Frise	10.342	7	8.30536	345	Mix feeding	wet product : Satiety Weight Management Canine / dry product : Satiety Weight Management Dry	2015-03-20	2	2015-04-02	0	0	0	-0.453597	1.85714	-2.26244	345	0	70.518	0	-0.453597	-4.20168	1.85714	-2.26244
1828740	1511545	USA	male	neutered	2009-03-14	Bichon Frise	10.1152	7	8.30536	345	Mix feeding	wet product : Satiety Weight Management Canine / dry product : Satiety Small Dog	2015-03-20	3	2015-04-17	0	0	0	-0.680396	4	-1.57563	345	0	70.518	0	-0.226799	-2.10084	2.14286	-0.980392
1828740	1511545	USA	male	neutered	2009-03-14	Bichon Frise	8.98122	7	8.30536	345	Mix feeding	wet product : Satiety Weight Management Canine / dry product : Satiety Small Dog	2015-03-20	4	2015-05-14	1	1	0	-1.81439	7.85714	-2.13904	345	0	70.518	0	-1.13399	-10.5042	3.85714	-2.72331
1828740	1511545	USA	male	neutered	2009-03-14	Bichon Frise	8.8905	7	8.30536	345	Mix feeding	wet product : Satiety Weight Management Canine / dry product : Satiety Small Dog	2015-03-20	5	2015-06-12	1	1	0	-1.90511	12	-1.47059	345	0	70.518	0	-0.0907194	-0.840336	4.14286	-0.20284
1828866	1507106	Germany	male	intact	2009-03-20	German Shepherd Dog	55	8	42	1325	Dry	Satiety Weight Management Dry	2015-03-20	1	2015-03-20	-1	-1	-2	0	0	#N/A	1265	-72	76.675	-4.364	0	0	0
1828866	1507106	Germany	male	intact	2009-03-20	German Shepherd Dog	53.8	8	42	1253	Dry	Satiety Weight Management Dry	2015-03-20	2	2015-04-13	-1	-1	-1	-1.2	3.42857	-0.636364	1265	-72	76.675	-4.364	-1.2	-2.18182	3.42857	-0.636364
1828866	1507106	Germany	male	intact	2009-03-20	German Shepherd Dog	51.1	8	42	1253	Dry	Satiety Weight Management Dry	2015-03-20	3	2015-04-27	-1	0	-1	-3.9	5.42857	-1.30622	1265	-72	76.675	-4.364	-2.7	-4.90909	2	-2.45455
1828866	1507106	Germany	male	intact	2009-03-20	German Shepherd Dog	49.5	8	42	1253	Dry	Satiety Weight Management Dry	2015-03-20	4	2015-05-12	-1	0	0	-5.5	7.57143	-1.32075	1265	-72	76.675	-4.364	-1.6	-2.90909	2.14286	-1.35758
1828866	1507106	Germany	male	intact	2009-03-20	German Shepherd Dog	47.1	8	42	1253	Dry	Satiety Weight Management Dry	2015-03-20	5	2015-06-11	-1	0	0	-7.9	11.8571	-1.21139	1265	-72	76.675	-4.364	-2.4	-4.36364	4.28571	-1.01818
1828973	1502313	USA	female	neutered	2012-03-20	Miniature Pinscher	6.305	7	5.25265	210	Dry	Satiety Small Dog	2015-03-20	1	2015-03-20	0	0	0	0	0	#N/A	210	0	60.525	0	0	0	0
1828973	1502313	USA	female	neutered	2012-03-20	Miniature Pinscher	5.98748	7	5.25265	210	Dry	Satiety Small Dog	2015-03-20	2	2015-04-03	0	0	0	-0.317518	2	-2.51799	210	0	60.525	0	-0.317518	-5.03597	2	-2.51799
1828973	1502313	USA	female	neutered	2012-03-20	Miniature Pinscher	5.98748	7	5.25265	210	Dry	Satiety Small Dog	2015-03-20	3	2015-04-17	0	0	0	-0.317518	4	-1.25899	210	0	60.525	0	0	0	2	0
1828973	1502313	USA	female	neutered	2012-03-20	Miniature Pinscher	5.71532	7	5.25265	210	Dry	Satiety Small Dog	2015-03-20	4	2015-05-18	1	1	0	-0.589676	8.42857	-1.10962	210	0	60.525	0	-0.272158	-4.31655	4.42857	-0.974704
1828973	1502313	USA	female	neutered	2012-03-20	Miniature Pinscher	5.71532	7	5.25265	191	Dry	Satiety Small Dog	2015-03-20	5	2015-06-15	1	1	-1	-0.589676	12.4286	-0.752501	210	0	60.525	0	0	0	4	0
1828979	1502313	USA	male	neutered	2010-03-20	Giant	43.5453	8	33.4981	981	Dry	Satiety Weight Management Dry	2015-03-20	1	2015-03-20	0	0	-2	0	0	#N/A	817.333	-261	58.699	-18.745	0	0	0
1828979	1502313	USA	male	neutered	2010-03-20	Giant	43.0917	8	33.4981	889	Dry	Satiety Weight Management Dry	2015-03-20	2	2015-04-03	0	0	-2	-0.453597	2	-0.520833	817.333	-261	58.699	-18.745	-0.453597	-1.04167	2	-0.520833
1828979	1502313	USA	male	neutered	2010-03-20	Giant	42.1845	8	33.4981	797	Dry	Satiety Weight Management Dry	2015-03-20	3	2015-04-16	0	0	-2	-1.36079	3.85714	-0.810185	817.333	-261	58.699	-18.745	-0.907194	-2.08333	1.85714	-1.12179
1828979	1502313	USA	male	neutered	2010-03-20	Giant	40.4155	8	33.4981	720	Dry	Satiety Weight Management Dry	2015-03-20	4	2015-05-12	0	0	-2	-3.12982	7.57143	-0.949292	817.333	-261	58.699	-18.745	-1.76903	-4.0625	3.71429	-1.09375
1828979	1502313	USA	male	neutered	2010-03-20	Giant	37.195	8	33.4981	720	Dry	Satiety Weight Management Dry	2015-03-20	5	2015-06-08	0	0	-1	-6.35036	11.4286	-1.27604	817.333	-261	58.699	-18.745	-3.22054	-7.39583	3.85714	-1.91744
1828988	1502313	USA	female	neutered	2008-03-20	Golden Retriever	37.195	7	30.9943	795	Mix feeding	wet product : Satiety Weight Management Canine / dry product : Satiety Weight Management Dry	2015-03-20	1	2015-03-20	0	0	-1	0	0	#N/A	723	-144	55.04	-10.962	0	0	0
1828988	1502313	USA	female	neutered	2008-03-20	Golden Retriever	36.2878	7	30.9943	795	Dry	Satiety Weight Management Dry	2015-03-20	2	2015-04-03	0	0	-2	-0.907194	2	-1.21951	723	-144	55.04	-10.962	-0.907194	-2.43902	2	-1.21951
1828988	1502313	USA	female	neutered	2008-03-20	Golden Retriever	35.7888	7	30.9943	723	Dry	Satiety Weight Management Dry	2015-03-20	3	2015-04-16	0	0	-2	-1.40615	3.85714	-0.980126	723	-144	55.04	-10.962	-0.498957	-1.34146	1.85714	-0.722326
1828988	1502313	USA	female	neutered	2008-03-20	Golden Retriever	35.4259	7	30.9943	651	Dry	Satiety Weight Management Dry	2015-03-20	4	2015-05-12	0	0	-2	-1.76903	7.57143	-0.628164	723	-144	55.04	-10.962	-0.362878	-0.97561	3.71429	-0.262664
1828988	1502313	USA	female	neutered	2008-03-20	Golden Retriever	33.6115	7	30.9943	593	Dry	Satiety Weight Management Dry	2015-03-20	5	2015-06-08	0	0	-2	-3.58342	11.4286	-0.842988	723	-144	55.04	-10.962	-1.81439	-4.87805	3.85714	-1.26468
1829009	1072650	Denmark	female	intact	2009-06-16	Rottweiler	46.2	8	36	970	Dry	Satiety Weight Management - overvÃ¦gtsdiÃ¦t	2015-03-20	1	2015-03-20	0	0	0	0	0	#N/A	905.333	-97	61.6	-6.6	0	0	0
1829009	1072650	Denmark	female	intact	2009-06-16	Rottweiler	44.5	8	36	970	Dry	Satiety Weight Management - overvÃ¦gtsdiÃ¦t	2015-03-20	2	2015-04-09	0	0	0	-1.7	2.85714	-1.28788	905.333	-97	61.6	-6.6	-1.7	-3.67965	2.85714	-1.28788
1829009	1072650	Denmark	female	intact	2009-06-16	Rottweiler	44.15	8	36	873	Dry	Satiety Weight Management - overvÃ¦gtsdiÃ¦t	2015-03-20	3	2015-04-23	0	0	0	-2.05	4.85714	-0.913547	905.333	-97	61.6	-6.6	-0.35	-0.757576	2	-0.378788
1829009	1072650	Denmark	female	intact	2009-06-16	Rottweiler	40.9	8	36	873	Dry	Satiety Weight Management - overvÃ¦gtsdiÃ¦t	2015-03-20	4	2015-05-21	0	0	-2	-5.3	8.85714	-1.29521	905.333	-97	61.6	-6.6	-3.25	-7.03463	4	-1.75866
1829009	1072650	Denmark	female	intact	2009-06-16	Rottweiler	42.2	8	36	793	Dry	Satiety Weight Management - overvÃ¦gtsdiÃ¦t	2015-03-20	5	2015-06-18	0	0	-2	-4	12.8571	-0.673401	905.333	-97	61.6	-6.6	1.3	2.81385	4	0.703463
1829692	1504860	Slovakia	male	intact	2008-03-20	German Shepherd Dog	43.5	8	33.46	1118	Dry	Satiety Weight Management Dry	2015-03-20	1	2015-03-20	-1	-1	-1	0	0	#N/A	1207.17	107	86.771	7.691	0	0	0
1829692	1504860	Slovakia	male	intact	2008-03-20	German Shepherd Dog	39.5	8	33.46	1225	Dry	Satiety Weight Management Dry	2015-03-20	2	2015-04-08	1	1	-1	-4	2.71429	-3.38778	1207.17	107	86.771	7.691	-4	-9.1954	2.71429	-3.38778
1829692	1504860	Slovakia	male	intact	2008-03-20	German Shepherd Dog	38.1	8	33.46	1225	Dry	Satiety Weight Management Dry	2015-03-20	3	2015-04-23	1	1	0	-5.4	4.85714	-2.55578	1207.17	107	86.771	7.691	-1.4	-3.21839	2.14286	-1.50192
1829692	1504860	Slovakia	male	intact	2008-03-20	German Shepherd Dog	35	8	33.46	1225	Dry	Satiety Weight Management Dry	2015-03-20	4	2015-05-19	1	1	-2	-8.5	8.57143	-2.27969	1207.17	107	86.771	7.691	-3.1	-7.12644	3.71429	-1.91866
1829692	1504860	Slovakia	male	intact	2008-03-20	German Shepherd Dog	34	8	33.46	1225	Dry	Satiety Weight Management Dry	2015-03-20	5	2015-06-22	1	1	-1	-9.5	13.4286	-1.62631	1207.17	107	86.771	7.691	-1	-2.29885	4.85714	-0.473293
1831900	1511545	USA	male	neutered	2006-03-17	Cocker Spaniel	17.5542	8	13.5036	496	Mix feeding	wet product : Satiety Weight Management Canine / dry product : Satiety Small Dog	2015-03-20	1	2015-03-20	-1	-1	-3	0	0	#N/A	457.667	-46	64.97	-6.53	0	0	0
1831900	1511545	USA	male	neutered	2006-03-17	Cocker Spaniel	17.5088	8	13.5036	450	Mix feeding	wet product : Satiety Weight Management Canine / dry product : Satiety Small Dog	2015-03-20	2	2015-04-03	0	-1	-2	-0.0453597	2	-0.129199	457.667	-46	64.97	-6.53	-0.0453597	-0.258398	2	-0.129199
1831900	1511545	USA	male	neutered	2006-03-17	Cocker Spaniel	16.1481	8	13.5036	450	Mix feeding	wet product : Satiety Weight Management Canine / dry product : Satiety Small Dog	2015-03-20	3	2015-04-18	1	1	-1	-1.40615	4.14286	-1.93353	457.667	-46	64.97	-6.53	-1.36079	-7.75194	2.14286	-3.61757
1831900	1511545	USA	male	neutered	2006-03-17	Cocker Spaniel	15.6945	8	13.5036	450	Mix feeding	wet product : Satiety Weight Management Canine / dry product : Satiety Small Dog	2015-03-20	4	2015-05-16	1	1	0	-1.85975	8.14286	-1.30106	457.667	-46	64.97	-6.53	-0.453597	-2.58398	4	-0.645995
1831900	1511545	USA	male	neutered	2006-03-17	Cocker Spaniel	15.0141	8	13.5036	450	Dry	Satiety Small Dog	2015-03-20	5	2015-06-13	0	0	0	-2.54014	12.1429	-1.19167	457.667	-46	64.97	-6.53	-0.680396	-3.87597	4	-0.968992
1831961	1512747	USA	male	neutered	2004-12-13	Dachshund	11.6574	7	8.96761	365	Dry	Satiety Weight Management Dry	2015-03-23	1	2015-03-23	1	0	0	0	0	#N/A	325.333	-68	62.78	-13.122	0	0	0
1831961	1512747	USA	male	neutered	2004-12-13	Dachshund	11.476	7	8.96761	331	Dry	Satiety Weight Management Dry	2015-03-23	2	2015-04-06	0	0	0	-0.181439	2	-0.77821	325.333	-68	62.78	-13.122	-0.181439	-1.55642	2	-0.77821
1831961	1512747	USA	male	neutered	2004-12-13	Dachshund	11.1585	7	8.96761	331	Dry	Satiety Weight Management Dry	2015-03-23	3	2015-04-21	1	1	-1	-0.498957	4.14286	-1.03314	325.333	-68	62.78	-13.122	-0.317518	-2.72374	2.14286	-1.27108
1831961	1512747	USA	male	neutered	2004-12-13	Dachshund	11.3399	7	8.96761	297	Dry	Satiety Weight Management Dry	2015-03-23	4	2015-05-22	1	1	-1	-0.317518	8.57143	-0.317769	325.333	-68	62.78	-13.122	0.181439	1.55642	4.42857	0.35145
1831961	1512747	USA	male	neutered	2004-12-13	Dachshund	11.5667	7	8.96761	268	Dry	Satiety Weight Management Dry	2015-03-23	5	2015-06-23	1	1	-1	-0.0907194	13.1429	-0.0592116	325.333	-68	62.78	-13.122	0.226799	1.94553	4.57143	0.425584
1832054	1511537	Hungary	female	neutered	2005-08-15	Pug	11.9	7	8.5	302	Dry	Satiety Small Dog	2015-03-20	1	2015-03-20	-1	-1	-3	0	0	#N/A	278.667	-28	55.978	-5.625	0	0	0
1832054	1511537	Hungary	female	neutered	2005-08-15	Pug	11.8	7	8.5	274	Dry	Satiety Small Dog	2015-03-20	2	2015-04-03	-1	-1	-3	-0.1	2	-0.420168	278.667	-28	55.978	-5.625	-0.1	-0.840336	2	-0.420168
1832054	1511537	Hungary	female	neutered	2005-08-15	Pug	11.4	7	8.5	274	Dry	Satiety Small Dog	2015-03-20	3	2015-04-17	-1	-1	-3	-0.5	4	-1.05042	278.667	-28	55.978	-5.625	-0.4	-3.36134	2	-1.68067
1832054	1511537	Hungary	female	neutered	2005-08-15	Pug	10.8	7	8.5	274	Dry	Satiety Small Dog	2015-03-20	4	2015-05-18	0	0	-1	-1.1	8.42857	-1.09671	278.667	-28	55.978	-5.625	-0.6	-5.04202	4.42857	-1.13852
1832054	1511537	Hungary	female	neutered	2005-08-15	Pug	10.9	7	8.5	247	Dry	Satiety Small Dog	2015-03-20	5	2015-06-15	0	0	-1	-1	12.4286	-0.676133	278.667	-28	55.978	-5.625	0.1	0.840336	4	0.210084
1832067	1511537	Hungary	female	neutered	2007-09-04	Pug	13.6	7	9.71	333	Dry	Satiety Small Dog	2015-03-20	1	2015-03-20	-1	-1	-2	0	0	#N/A	333	0	60.538	0	0	0	0
1832067	1511537	Hungary	female	neutered	2007-09-04	Pug	13.1	7	9.71	333	Dry	Satiety Small Dog	2015-03-20	2	2015-04-03	-1	-1	-2	-0.5	2	-1.83824	333	0	60.538	0	-0.5	-3.67647	2	-1.83824
1832067	1511537	Hungary	female	neutered	2007-09-04	Pug	12.8	7	9.71	333	Dry	Satiety Small Dog	2015-03-20	3	2015-04-17	-1	-1	-2	-0.8	4	-1.47059	333	0	60.538	0	-0.3	-2.20588	2	-1.10294
1832067	1511537	Hungary	female	neutered	2007-09-04	Pug	12.3	7	9.71	333	Dry	Satiety Small Dog	2015-03-20	4	2015-05-18	-1	-1	-2	-1.3	8.42857	-1.1341	333	0	60.538	0	-0.5	-3.67647	4.42857	-0.830171
1832067	1511537	Hungary	female	neutered	2007-09-04	Pug	12.1	7	9.71	303	Dry	Satiety Small Dog	2015-03-20	5	2015-06-15	0	0	-1	-1.5	12.4286	-0.887424	333	0	60.538	0	-0.2	-1.47059	4	-0.367647
1832228	1501872	Portugal	female	neutered	2004-03-08	X-SMALL	6.8	7	5.67	223	Mix feeding	wet product : Satiety Weight Management Canine / dry product : Satiety Small Dog	2015-03-21	1	2015-03-21	0	1	-1	0	0	#N/A	238.333	28	64.863	7.62	0	0	0
1832228	1501872	Portugal	female	neutered	2004-03-08	X-SMALL	6.7	7	5.67	203	Mix feeding	wet product : Satiety Weight Management Canine / dry product : Satiety Small Dog	2015-03-21	2	2015-04-03	1	1	-1	-0.1	1.85714	-0.791855	238.333	28	64.863	7.62	-0.1	-1.47059	1.85714	-0.791855
1832228	1501872	Portugal	female	neutered	2004-03-08	X-SMALL	6.5	7	5.67	251	Mix feeding	wet product : Satiety Weight Management Canine / dry product : Satiety Small Dog	2015-03-21	3	2015-04-18	1	0	-1	-0.3	4	-1.10294	238.333	28	64.863	7.62	-0.2	-2.94118	2.14286	-1.37255
1832228	1501872	Portugal	female	neutered	2004-03-08	X-SMALL	6.45	7	5.67	251	Mix feeding	wet product : Satiety Weight Management Canine / dry product : Satiety Small Dog	2015-03-21	4	2015-05-16	1	0	-1	-0.35	8	-0.643382	238.333	28	64.863	7.62	-0.05	-0.735294	4	-0.183824
1832228	1501872	Portugal	female	neutered	2004-03-08	X-SMALL	6	7	5.67	251	Mix feeding	wet product : Satiety Weight Management Canine / dry product : Satiety Small Dog	2015-03-21	5	2015-06-20	1	1	-1	-0.8	13	-0.904977	238.333	28	64.863	7.62	-0.45	-6.61765	5	-1.32353
1832251	1507572	USA	female	neutered	2007-03-12	German Shorthaired Pointer	39.3269	7	29.4838	891	Dry	Satiety Weight Management Dry	2015-03-20	1	2015-03-20	0	0	-2	0	0	#N/A	742.833	-236	58.709	-18.652	0	0	0
1832251	1507572	USA	female	neutered	2007-03-12	German Shorthaired Pointer	39.1908	7	29.4838	808	Dry	Satiety Weight Management Dry	2015-03-20	2	2015-04-03	0	1	0	-0.136079	2	-0.17301	742.833	-236	58.709	-18.652	-0.136079	-0.346021	2	-0.17301
1832251	1507572	USA	female	neutered	2007-03-12	German Shorthaired Pointer	38.7372	7	29.4838	724	Dry	Satiety Weight Management Dry	2015-03-20	3	2015-04-17	1	1	0	-0.589676	4	-0.374856	742.833	-236	58.709	-18.652	-0.453597	-1.1534	2	-0.576701
1832251	1507572	USA	female	neutered	2007-03-12	German Shorthaired Pointer	37.1496	7	29.4838	655	Dry	Satiety Weight Management Dry	2015-03-20	4	2015-05-15	1	1	0	-2.17727	8	-0.692042	742.833	-236	58.709	-18.652	-1.58759	-4.03691	4	-1.00923
1832251	1507572	USA	female	neutered	2007-03-12	German Shorthaired Pointer	35.7434	7	29.4838	585	Dry	Satiety Weight Management Dry	2015-03-20	5	2015-06-16	1	1	0	-3.58342	12.5714	-0.724809	742.833	-236	58.709	-18.652	-1.40615	-3.57555	4.57143	-0.782151
1832278	1515214	USA	male	neutered	2005-06-03	Cocker Spaniel	19.2779	9	14.8281	532	Mix feeding	wet product : Satiety Weight Management Canine / dry product : Satiety Weight Management Dry	2015-03-20	1	2015-03-20	-1	0	-3	0	0	#N/A	443.833	-141	58.736	-18.66	0	0	0
1832278	1515214	USA	male	neutered	2005-06-03	Cocker Spaniel	19.0511	9	14.8281	483	Mix feeding	wet product : Satiety Weight Management Canine / dry product : Satiety Weight Management Dry	2015-03-20	2	2015-04-02	0	0	-1	-0.226799	1.85714	-0.633484	443.833	-141	58.736	-18.66	-0.226799	-1.17647	1.85714	-0.633484
1832278	1515214	USA	male	neutered	2005-06-03	Cocker Spaniel	18.5975	9	14.8281	433	Mix feeding	wet product : Satiety Weight Management Canine / dry product : Satiety Weight Management Dry	2015-03-20	3	2015-04-17	1	0	-1	-0.680396	4	-0.882353	443.833	-141	58.736	-18.66	-0.453597	-2.35294	2.14286	-1.09804
1832278	1515214	USA	male	neutered	2005-06-03	Cocker Spaniel	18.416	9	14.8281	391	Mix feeding	wet product : Satiety Weight Management Canine / dry product : Satiety Weight Management Dry	2015-03-20	4	2015-05-11	1	1	-1	-0.861834	7.42857	-0.60181	443.833	-141	58.736	-18.66	-0.181439	-0.941176	3.42857	-0.27451
1832278	1515214	USA	male	neutered	2005-06-03	Cocker Spaniel	16.6924	9	14.8281	391	Mix feeding	wet product : Satiety Weight Management Canine / dry product : Satiety Weight Management Dry	2015-03-20	5	2015-06-12	1	1	-1	-2.5855	12	-1.11765	443.833	-141	58.736	-18.66	-1.72367	-8.94118	4.57143	-1.95588
1832309	1491877	USA	female	neutered	2006-07-28	Golden Retriever	33.2033	8	28.5766	748	Dry	Satiety Weight Management Dry	2015-03-20	1	2015-03-20	-1	0	-1	0	0	#N/A	628	-190	50.81	-15.373	0	0	0
1832309	1491877	USA	female	neutered	2006-07-28	Golden Retriever	34.7909	8	28.5766	680	Dry	Satiety Weight Management Dry	2015-03-20	2	2015-04-03	0	-1	-1	1.58759	2	2.39071	628	-190	50.81	-15.373	1.58759	4.78142	2	2.39071
1832309	1491877	USA	female	neutered	2006-07-28	Golden Retriever	34.1559	8	28.5766	612	Dry	Satiety Weight Management Dry	2015-03-20	3	2015-04-21	-1	0	0	0.952554	4.57143	0.627561	628	-190	50.81	-15.373	-0.635036	-1.91257	2.57143	-0.743777
1832309	1491877	USA	female	neutered	2006-07-28	Golden Retriever	33.8383	8	28.5766	558	Dry	Satiety Weight Management Dry	2015-03-20	4	2015-05-11	1	0	0	0.635036	7.42857	0.257461	628	-190	50.81	-15.373	-0.317518	-0.956284	2.85714	-0.334699
1832309	1491877	USA	female	neutered	2006-07-28	Golden Retriever	33.5208	8	28.5766	504	Dry	Satiety Weight Management Dry	2015-03-20	5	2015-06-05	1	0	0	0.317518	11	0.0869349	628	-190	50.81	-15.373	-0.317518	-0.956284	3.57143	-0.26776
1832422	1510442	Portugal	female	neutered	2004-03-16	Dachshund	11.5	7	9.58	330	Dry	Satiety Weight Management Dry	2015-03-21	1	2015-03-21	0	0	-3	0	0	#N/A	330	0	60.602	0	0	0	0
1832422	1510442	Portugal	female	neutered	2004-03-16	Dachshund	10.9	7	9.58	330	Dry	Satiety Weight Management Dry	2015-03-21	2	2015-04-06	1	1	0	-0.6	2.28571	-2.28261	330	0	60.602	0	-0.6	-5.21739	2.28571	-2.28261
1832422	1510442	Portugal	female	neutered	2004-03-16	Dachshund	10.35	7	9.58	330	Dry	Satiety Weight Management Dry	2015-03-21	3	2015-04-20	0	0	0	-1.15	4.28571	-2.33333	330	0	60.602	0	-0.55	-4.78261	2	-2.3913
1832422	1510442	Portugal	female	neutered	2004-03-16	Dachshund	9.8	7	9.58	330	Dry	Satiety Weight Management Dry	2015-03-21	4	2015-05-20	0	0	0	-1.7	8.57143	-1.72464	330	0	60.602	0	-0.55	-4.78261	4.28571	-1.11594
1832422	1510442	Portugal	female	neutered	2004-03-16	Dachshund	9.1	7	9.58	330	Dry	Satiety Weight Management Dry	2015-03-21	5	2015-06-22	1	1	0	-2.4	13.2857	-1.57083	330	0	60.602	0	-0.7	-6.08696	4.71429	-1.29117
1832584	1486092	USA	male	neutered	2011-03-23	Beagle	16.6924	9	12.8413	478	Dry	Satiety Weight Management Dry	2015-03-21	1	2015-03-21	1	1	0	0	0	#N/A	433.333	-89	63.88	-13.12	0	0	0
1832584	1486092	USA	male	neutered	2011-03-23	Beagle	16.1481	9	12.8413	478	Dry	Satiety Weight Management Dry	2015-03-21	2	2015-04-06	1	1	0	-0.544316	2.28571	-1.42663	433.333	-89	63.88	-13.12	-0.544316	-3.26087	2.28571	-1.42663
1832584	1486092	USA	male	neutered	2011-03-23	Beagle	16.0573	9	12.8413	433	Dry	Satiety Small Dog	2015-03-21	3	2015-04-20	1	1	0	-0.635036	4.28571	-0.887681	433.333	-89	63.88	-13.12	-0.0907194	-0.543478	2	-0.271739
1832584	1486092	USA	male	neutered	2011-03-23	Beagle	15.6037	9	12.8413	389	Dry	Satiety Small Dog	2015-03-21	4	2015-05-23	1	1	0	-1.08863	9	-0.724638	433.333	-89	63.88	-13.12	-0.453597	-2.71739	4.71429	-0.576416
1832584	1486092	USA	male	neutered	2011-03-23	Beagle	15.3316	9	12.8413	351	Dry	Satiety Small Dog	2015-03-21	5	2015-06-20	1	1	0	-1.36079	13	-0.62709	433.333	-89	63.88	-13.12	-0.272158	-1.63043	4	-0.407609
1832883	1262433	Italy	female	neutered	2009-02-02	Labrador Retriever	52	8	37.14	911	Dry	Satiety Weight Management Dry	2015-03-22	1	2015-03-22	-1	0	-3	0	0	#N/A	911	0	60.553	0	0	0	0
1832883	1262433	Italy	female	neutered	2009-02-02	Labrador Retriever	50.1	8	37.14	911	Dry	Satiety Weight Management Dry	2015-03-22	2	2015-04-05	-1	0	-2	-1.9	2	-1.82692	911	0	60.553	0	-1.9	-3.65385	2	-1.82692
1832883	1262433	Italy	female	neutered	2009-02-02	Labrador Retriever	47.2	8	37.14	911	Dry	Satiety Weight Management Dry	2015-03-22	3	2015-04-23	-1	0	-2	-4.8	4.57143	-2.01923	911	0	60.553	0	-2.9	-5.57692	2.57143	-2.1688
1832883	1262433	Italy	female	neutered	2009-02-02	Labrador Retriever	44.5	8	37.14	911	Dry	Satiety Weight Management Dry	2015-03-22	4	2015-05-25	0	0	-2	-7.5	9.14286	-1.57752	911	0	60.553	0	-2.7	-5.19231	4.57143	-1.13582
1832883	1262433	Italy	female	neutered	2009-02-02	Labrador Retriever	39.5	8	37.14	911	Dry	Satiety Weight Management Dry	2015-03-22	5	2015-06-22	0	0	-1	-12.5	13.1429	-1.82901	911	0	60.553	0	-5	-9.61538	4	-2.40385
1833242	1515218	Argentina	male	neutered	2012-03-22	Pug	11.5	8	9.58	384	Dry	Satiety Weight Management Dry	2015-03-31	1	2015-03-31	0	0	-2	0	0	#N/A	414	36	76.028	6.611	0	0	0
1833242	1515218	Argentina	male	neutered	2012-03-22	Pug	10.5	8	9.58	420	Dry	Satiety Weight Management Dry	2015-03-31	2	2015-04-18	0	0	-2	-1	2.57143	-3.38164	414	36	76.028	6.611	-1	-8.69565	2.57143	-3.38164
1833242	1515218	Argentina	male	neutered	2012-03-22	Pug	10.5	8	9.58	420	Dry	Satiety Weight Management Dry	2015-03-31	3	2015-05-09	1	1	-2	-1	5.57143	-1.56076	414	36	76.028	6.611	0	0	3	0
1833242	1515218	Argentina	male	neutered	2012-03-22	Pug	10.3	8	9.58	420	Dry	Satiety Weight Management Dry	2015-03-31	4	2015-05-28	1	1	-2	-1.2	8.28571	-1.25937	414	36	76.028	6.611	-0.2	-1.73913	2.71429	-0.640732
1833242	1515218	Argentina	male	neutered	2012-03-22	Pug	10.1	8	9.58	420	Dry	Satiety Weight Management Dry	2015-03-31	5	2015-06-12	1	1	-2	-1.4	10.4286	-1.16736	414	36	76.028	6.611	-0.2	-1.73913	2.14286	-0.811594
1833461	1507576	Germany	female	intact	2005-03-03	Labrador	47.3	7	33.79	987	Dry	Satiety Weight Management Dry	2015-04-07	1	2015-04-07	-1	0	-3	0	0	#N/A	987	0	70.425	0	0	0	0
1833461	1507576	Germany	female	intact	2005-03-03	Labrador	46.6	7	33.79	987	Dry	Satiety Weight Management Dry	2015-04-07	2	2015-04-16	-1	-1	-2	-0.7	1.28571	-1.15105	987	0	70.425	0	-0.7	-1.47992	1.28571	-1.15105
1833461	1507576	Germany	female	intact	2005-03-03	Labrador	44.2	7	33.79	987	Dry	Satiety Weight Management Dry	2015-04-07	3	2015-05-07	0	0	-2	-3.1	4.28571	-1.52925	987	0	70.425	0	-2.4	-5.074	3	-1.69133
1833461	1507576	Germany	female	intact	2005-03-03	Labrador	42	7	33.79	987	Dry	Satiety Weight Management Dry	2015-04-07	4	2015-06-03	0	0	-2	-5.3	8.14286	-1.37606	987	0	70.425	0	-2.2	-4.65116	3.85714	-1.20586
1833461	1507576	Germany	female	intact	2005-03-03	Labrador	40.4	7	33.79	987	Dry	Satiety Weight Management Dry	2015-04-07	5	2015-07-03	1	1	-1	-6.9	12.4286	-1.17373	987	0	70.425	0	-1.6	-3.38266	4.28571	-0.789288
1833916	1502313	USA	female	neutered	2010-03-23	Medium	19.2779	7	14.8281	458	Dry	Satiety Weight Management Dry	2015-03-23	1	2015-03-23	1	0	-2	0	0	#N/A	458	0	60.611	0	0	0	0
1833916	1502313	USA	female	neutered	2010-03-23	Medium	18.8243	7	14.8281	458	Dry	Satiety Weight Management Dry	2015-03-23	2	2015-04-06	1	1	0	-0.453597	2	-1.17647	458	0	60.611	0	-0.453597	-2.35294	2	-1.17647
1833916	1502313	USA	female	neutered	2010-03-23	Medium	18.0532	7	14.8281	458	Dry	Satiety Weight Management Dry	2015-03-23	3	2015-04-20	0	1	-1	-1.22471	4	-1.58824	458	0	60.611	0	-0.771115	-4	2	-2
1833916	1502313	USA	female	neutered	2010-03-23	Medium	17.3728	7	14.8281	458	Dry	Satiety Weight Management Dry	2015-03-23	4	2015-05-18	1	1	-1	-1.90511	8	-1.23529	458	0	60.611	0	-0.680396	-3.52941	4	-0.882353
1833916	1502313	USA	female	neutered	2010-03-23	Medium	16.5563	7	14.8281	458	Dry	Satiety Weight Management Dry	2015-03-23	5	2015-06-15	0	0	-1	-2.72158	12	-1.17647	458	0	60.611	0	-0.816475	-4.23529	4	-1.05882
1833940	1493717	Italy	female	intact	2013-03-12	Pinscher Tedesco	6.3	7	4.85	231	Dry	Satiety Small Dog	2015-03-23	1	2015-03-23	0	0	-2	0	0	#N/A	231	0	70.681	0	0	0	0
1833940	1493717	Italy	female	intact	2013-03-12	Pinscher Tedesco	6.1	7	4.85	231	Dry	Satiety Small Dog	2015-03-23	2	2015-04-11	0	0	-2	-0.2	2.71429	-1.16959	231	0	70.681	0	-0.2	-3.1746	2.71429	-1.16959
1833940	1493717	Italy	female	intact	2013-03-12	Pinscher Tedesco	5.65	7	4.85	231	Dry	Satiety Small Dog	2015-03-23	3	2015-04-30	1	1	-1	-0.65	5.42857	-1.90058	231	0	70.681	0	-0.45	-7.14286	2.71429	-2.63158
1833940	1493717	Italy	female	intact	2013-03-12	Pinscher Tedesco	5.5	7	4.85	231	Dry	Satiety Small Dog	2015-03-23	4	2015-05-25	0	0	-1	-0.8	9	-1.41093	231	0	70.681	0	-0.15	-2.38095	3.57143	-0.666667
1833940	1493717	Italy	female	intact	2013-03-12	Pinscher Tedesco	5.6	7	4.85	209	Dry	Satiety Small Dog	2015-03-23	5	2015-06-24	1	1	-1	-0.7	13.2857	-0.83632	231	0	70.681	0	0.1	1.5873	4.28571	0.37037
1833991	1507104	USA	male	neutered	2009-03-20	Maxi	48.9885	9	34.9905	1013	Dry	Satiety Weight Management Dry	2015-03-23	1	2015-03-23	1	1	-1	0	0	#N/A	870.5	-190	60.507	-13.207	0	0	0
1833991	1507104	USA	male	neutered	2009-03-20	Maxi	48.7163	9	34.9905	918	Dry	Satiety Weight Management Dry	2015-03-23	2	2015-04-06	1	0	-1	-0.272158	2	-0.277778	870.5	-190	60.507	-13.207	-0.272158	-0.555556	2	-0.277778
1833991	1507104	USA	male	neutered	2009-03-20	Maxi	50.9843	9	34.9905	823	Dry	Satiety Weight Management Dry	2015-03-23	3	2015-04-25	1	1	-1	1.99583	4.71429	0.864198	870.5	-190	60.507	-13.207	2.26799	4.62963	2.71429	1.70565
1833991	1507104	USA	male	neutered	2009-03-20	Maxi	43.9989	9	34.9905	823	Dry	Satiety Weight Management Dry	2015-03-23	4	2015-05-23	1	1	0	-4.98957	8.71429	-1.16879	870.5	-190	60.507	-13.207	-6.98539	-14.2593	4	-3.56481
1833991	1507104	USA	male	neutered	2009-03-20	Maxi	41.7581	9	34.9905	823	Dry	Satiety Weight Management Dry	2015-03-23	5	2015-06-20	1	1	-1	-7.23034	12.7143	-1.16084	870.5	-190	60.507	-13.207	-2.24077	-4.57407	4	-1.14352
1834099	1515198	Czech Republic	female	intact	2003-12-10	Bavarian Mountain Hound	39	7	27.86	854	Dry	Satiety Weight Management Dry	2015-03-24	1	2015-03-24	-1	-1	-3	0	0	#N/A	734	-160	60.529	-13.194	0	0	0
1834099	1515198	Czech Republic	female	intact	2003-12-10	Bavarian Mountain Hound	39	7	27.86	774	Dry	Satiety Weight Management Dry	2015-03-24	2	2015-04-07	-1	-1	-3	0	2	0	734	-160	60.529	-13.194	0	0	2	0
1834099	1515198	Czech Republic	female	intact	2003-12-10	Bavarian Mountain Hound	37.6	7	27.86	694	Dry	Satiety Weight Management Dry	2015-03-24	3	2015-04-21	-1	0	0	-1.4	4	-0.897436	734	-160	60.529	-13.194	-1.4	-3.58974	2	-1.79487
1834099	1515198	Czech Republic	female	intact	2003-12-10	Bavarian Mountain Hound	35	7	27.86	694	Dry	Satiety Weight Management Dry	2015-03-24	4	2015-05-27	0	0	0	-4	9.14286	-1.12179	734	-160	60.529	-13.194	-2.6	-6.66667	5.14286	-1.2963
1834099	1515198	Czech Republic	female	intact	2003-12-10	Bavarian Mountain Hound	34.1	7	27.86	694	Dry	Satiety Weight Management Dry	2015-03-24	5	2015-06-17	0	1	0	-4.9	12.1429	-1.03469	734	-160	60.529	-13.194	-0.9	-2.30769	3	-0.769231
1834496	1512747	USA	male	neutered	2012-10-26	Medium	23.2695	8	19.3913	651	Dry	Satiety Weight Management Dry	2015-04-07	1	2015-03-24	1	1	-3	0	0	#N/A	610.333	-61	66.048	-6.601	0	0	0
1834496	1512747	USA	male	neutered	2012-10-26	Medium	23.2695	8	19.3913	651	Dry	Satiety Weight Management Dry	2015-04-07	2	2015-04-07	1	1	-1	0	2	0	610.333	-61	66.048	-6.601	0	0	2	0
1834496	1512747	USA	male	neutered	2012-10-26	Medium	22.9974	8	19.3913	590	Dry	Satiety Weight Management Dry	2015-04-07	3	2015-04-22	1	1	-1	-0.272158	4.14286	-0.282315	610.333	-61	66.048	-6.601	-0.272158	-1.16959	2.14286	-0.545809
1834496	1512747	USA	male	neutered	2012-10-26	Medium	22.2263	8	19.3913	590	Dry	Satiety Weight Management Dry	2015-04-07	4	2015-05-08	1	1	-1	-1.04327	6.42857	-0.697423	610.333	-61	66.048	-6.601	-0.771115	-3.31384	2.28571	-1.44981
1834496	1512747	USA	male	neutered	2012-10-26	Medium	21.6819	8	19.3913	529	Dry	Satiety Weight Management Dry	2015-04-07	5	2015-06-17	1	1	-1	-1.58759	12.1429	-0.561862	610.333	-61	66.048	-6.601	-0.544316	-2.33918	5.71429	-0.409357
1834532	1507572	USA	female	intact	2009-03-23	Golden Retriever	30.9807	7	25.8187	807	Dry	Satiety Weight Management Dry	2015-03-24	1	2015-03-24	-1	-1	0	0	0	#N/A	672.667	-214	58.728	-18.684	0	0	0
1834532	1507572	USA	female	intact	2009-03-23	Golden Retriever	31.2982	7	25.8187	731	Dry	Satiety Weight Management Dry	2015-03-24	2	2015-04-08	-1	0	0	0.317518	2.14286	0.478282	672.667	-214	58.728	-18.684	0.317518	1.02489	2.14286	0.478282
1834532	1507572	USA	female	intact	2009-03-23	Golden Retriever	30.391	7	25.8187	656	Dry	Satiety Weight Management Dry	2015-03-24	3	2015-04-21	0	1	0	-0.589676	4	-0.475842	672.667	-214	58.728	-18.684	-0.907194	-2.92826	1.85714	-1.57675
1834532	1507572	USA	female	intact	2009-03-23	Golden Retriever	29.8013	7	25.8187	593	Dry	Satiety Weight Management Dry	2015-03-24	4	2015-05-20	0	1	-3	-1.17935	8.14286	-0.467494	672.667	-214	58.728	-18.684	-0.589676	-1.90337	4.14286	-0.459434
1834532	1507572	USA	female	intact	2009-03-23	Golden Retriever	28.622	7	25.8187	530	Dry	Satiety Weight Management Dry	2015-03-24	5	2015-06-15	0	0	-3	-2.3587	11.8571	-0.6421	672.667	-214	58.728	-18.684	-1.17935	-3.80673	3.71429	-1.02489
1834575	1522656	Brazil	male	neutered	2013-03-03	Pug	11.25	8	8.65	356	Dry	Satiety Weight Management Dry	2015-03-26	1	2015-03-26	0	1	-2	0	0	#N/A	322.333	-67	63.906	-13.284	0	0	0
1834575	1522656	Brazil	male	neutered	2013-03-03	Pug	10.85	8	8.65	356	Dry	Satiety Weight Management Dry	2015-03-26	2	2015-04-11	0	1	-2	-0.4	2.28571	-1.55556	322.333	-67	63.906	-13.284	-0.4	-3.55556	2.28571	-1.55556
1834575	1522656	Brazil	male	neutered	2013-03-03	Pug	10.75	8	8.65	322	Dry	Satiety Weight Management Dry	2015-03-26	3	2015-04-27	0	1	-2	-0.5	4.57143	-0.972222	322.333	-67	63.906	-13.284	-0.1	-0.888889	2.28571	-0.388889
1834575	1522656	Brazil	male	neutered	2013-03-03	Pug	10.5	8	8.65	289	Dry	Satiety Weight Management Dry	2015-03-26	4	2015-05-26	1	1	-3	-0.75	8.71429	-0.765027	322.333	-67	63.906	-13.284	-0.25	-2.22222	4.14286	-0.536398
1834575	1522656	Brazil	male	neutered	2013-03-03	Pug	10.25	8	8.65	261	Dry	Satiety Weight Management Dry	2015-03-26	5	2015-06-25	1	1	-3	-1	13	-0.683761	322.333	-67	63.906	-13.284	-0.25	-2.22222	4.28571	-0.518519
1834686	1511576	Italy	female	neutered	2005-10-11	Golden Retriever	38.3	9	31.92	813	Mix feeding	wet product : Satiety Weight Management Canine / dry product : Satiety Weight Management Dry	2015-03-25	1	2015-03-25	0	0	-2	0	0	#N/A	788.333	-74	58.703	-5.51	0	0	0
1834686	1511576	Italy	female	neutered	2005-10-11	Golden Retriever	37.1	9	31.92	813	Mix feeding	wet product : Satiety Weight Management Canine / dry product : Satiety Weight Management Dry	2015-03-25	2	2015-04-08	0	1	-2	-1.2	2	-1.56658	788.333	-74	58.703	-5.51	-1.2	-3.13316	2	-1.56658
1834686	1511576	Italy	female	neutered	2005-10-11	Golden Retriever	36.1	9	31.92	813	Mix feeding	wet product : Satiety Weight Management Canine / dry product : Satiety Weight Management Dry	2015-03-25	3	2015-04-24	0	0	-2	-2.2	4.28571	-1.3403	788.333	-74	58.703	-5.51	-1	-2.61097	2.28571	-1.1423
1834686	1511576	Italy	female	neutered	2005-10-11	Golden Retriever	35	9	31.92	739	Mix feeding	wet product : Satiety Weight Management Canine / dry product : Satiety Weight Management Dry	2015-03-25	4	2015-05-27	0	0	-2	-3.3	9	-0.957354	788.333	-74	58.703	-5.51	-1.1	-2.87206	4.71429	-0.609225
1834686	1511576	Italy	female	neutered	2005-10-11	Golden Retriever	34.4	9	31.92	665	Mix feeding	wet product : Satiety Weight Management Canine / dry product : Satiety Weight Management Dry	2015-03-25	5	2015-06-26	0	0	-2	-3.9	13.2857	-0.766445	788.333	-74	58.703	-5.51	-0.6	-1.56658	4.28571	-0.365535
1835002	1511537	Hungary	female	neutered	2009-02-12	Maxi	29.1	8	24.25	662	Dry	Satiety Weight Management Dry	2015-03-25	1	2015-03-25	0	0	-2	0	0	#N/A	642	-60	58.749	-5.491	0	0	0
1835002	1511537	Hungary	female	neutered	2009-02-12	Maxi	27.7	8	24.25	662	Dry	Satiety Weight Management Dry	2015-03-25	2	2015-04-09	0	0	-2	-1.4	2.14286	-2.24513	642	-60	58.749	-5.491	-1.4	-4.811	2.14286	-2.24513
1835002	1511537	Hungary	female	neutered	2009-02-12	Maxi	26.8	8	24.25	662	Dry	Satiety Weight Management Dry	2015-03-25	3	2015-04-24	0	0	-2	-2.3	4.28571	-1.84422	642	-60	58.749	-5.491	-0.9	-3.09278	2.14286	-1.4433
1835002	1511537	Hungary	female	neutered	2009-02-12	Maxi	26.9	8	24.25	602	Dry	Satiety Weight Management Dry	2015-03-25	4	2015-05-27	0	0	-2	-2.2	9	-0.840015	642	-60	58.749	-5.491	0.1	0.343643	4.71429	0.0728939
1835002	1511537	Hungary	female	neutered	2009-02-12	Maxi	25.8	8	24.25	541	Dry	Satiety Weight Management Dry	2015-03-25	5	2015-07-01	1	1	-1	-3.3	14	-0.810015	642	-60	58.749	-5.491	-1.1	-3.78007	5	-0.756014
1835009	1502313	USA	male	neutered	2011-03-25	Labrador Retriever	49.2153	9	37.8572	1075	Dry	Satiety Weight Management Dry	2015-03-25	1	2015-03-25	0	1	-2	0	0	#N/A	957.167	-202	62.716	-13.235	0	0	0
1835009	1502313	USA	male	neutered	2011-03-25	Labrador Retriever	48.3988	9	37.8572	974	Dry	Satiety Weight Management Dry	2015-03-25	2	2015-04-08	0	0	-1	-0.816475	2	-0.829493	957.167	-202	62.716	-13.235	-0.816475	-1.65899	2	-0.829493
1835009	1502313	USA	male	neutered	2011-03-25	Labrador Retriever	47.1741	9	37.8572	974	Dry	Satiety Weight Management Dry	2015-03-25	3	2015-04-23	0	0	-1	-2.04119	4.14286	-1.00111	957.167	-202	62.716	-13.235	-1.22471	-2.48848	2.14286	-1.16129
1835009	1502313	USA	male	neutered	2011-03-25	Labrador Retriever	45.8133	9	37.8572	873	Dry	Satiety Weight Management Dry	2015-03-25	4	2015-05-21	0	0	-1	-3.40198	8.14286	-0.848896	957.167	-202	62.716	-13.235	-1.36079	-2.76498	4	-0.691244
1835009	1502313	USA	male	neutered	2011-03-25	Labrador Retriever	44.4525	9	37.8572	790	Dry	Satiety Weight Management Dry	2015-03-25	5	2015-06-22	0	0	-1	-4.76277	12.7143	-0.761145	957.167	-202	62.716	-13.235	-1.36079	-2.76498	4.57143	-0.604839
1835055	1502827	Germany	male	neutered	2008-05-01	Hovawart	46.4	8	38.67	1092	Dry	Satiety Weight Management Dry	2015-03-25	1	2015-03-25	0	0	-1	0	0	#N/A	910.333	-290	58.704	-18.701	0	0	0
1835055	1502827	Germany	male	neutered	2008-05-01	Hovawart	45.6	8	38.67	990	Dry	Satiety Weight Management Dry	2015-03-25	2	2015-04-13	0	0	-2	-0.8	2.71429	-0.635209	910.333	-290	58.704	-18.701	-0.8	-1.72414	2.71429	-0.635209
1835055	1502827	Germany	male	neutered	2008-05-01	Hovawart	44.9	8	38.67	888	Dry	Satiety Weight Management Dry	2015-03-25	3	2015-04-27	0	1	-1	-1.5	4.71429	-0.685737	910.333	-290	58.704	-18.701	-0.7	-1.50862	2	-0.75431
1835055	1502827	Germany	male	neutered	2008-05-01	Hovawart	42.6	8	38.67	802	Dry	Satiety Weight Management Dry	2015-03-25	4	2015-05-22	1	1	-1	-3.8	8.28571	-0.988407	910.333	-290	58.704	-18.701	-2.3	-4.9569	3.57143	-1.38793
1835055	1502827	Germany	male	neutered	2008-05-01	Hovawart	39.2	8	38.67	802	Dry	Satiety Weight Management Dry	2015-03-25	5	2015-06-19	0	0	0	-7.2	12.2857	-1.26303	910.333	-290	58.704	-18.701	-3.4	-7.32759	4	-1.8319
1835082	1220315	Italy	female	neutered	2013-07-29	Chihuahua	2.95	8	2.46	119	Dry	Satiety Small Dog	2015-03-25	1	2015-03-25	0	0	-3	0	0	#N/A	108.667	-21	55.322	-10.691	0	0	0
1835082	1220315	Italy	female	neutered	2013-07-29	Chihuahua	2.8	8	2.46	119	Dry	Satiety Small Dog	2015-03-25	2	2015-04-08	0	0	-1	-0.15	2	-2.54237	108.667	-21	55.322	-10.691	-0.15	-5.08475	2	-2.54237
1835082	1220315	Italy	female	neutered	2013-07-29	Chihuahua	2.85	8	2.46	109	Dry	Satiety Small Dog	2015-03-25	3	2015-04-22	0	0	-1	-0.1	4	-0.847458	108.667	-21	55.322	-10.691	0.05	1.69492	2	0.847458
1835082	1220315	Italy	female	neutered	2013-07-29	Chihuahua	2.75	8	2.46	98	Dry	Satiety Small Dog	2015-03-25	4	2015-05-20	0	0	0	-0.2	8	-0.847458	108.667	-21	55.322	-10.691	-0.1	-3.38983	4	-0.847458
1835082	1220315	Italy	female	neutered	2013-07-29	Chihuahua	2.75	8	2.46	89	Dry	Satiety Small Dog	2015-03-25	5	2015-06-22	0	0	0	-0.2	12.7143	-0.533232	108.667	-21	55.322	-10.691	0	0	4.71429	0
1835177	1511525	Argentina	male	intact	2012-08-19	Beagle	16.5	7	13.75	574	Dry	Satiety Weight Management Dry	2015-03-25	1	2015-03-25	0	0	-1	0	0	#N/A	506	-149	70.864	-20.867	0	0	0
1835177	1511525	Argentina	male	intact	2012-08-19	Beagle	16	7	13.75	574	Dry	Satiety Weight Management Dry	2015-03-25	2	2015-04-07	0	0	-1	-0.5	1.85714	-1.6317	506	-149	70.864	-20.867	-0.5	-3.0303	1.85714	-1.6317
1835177	1511525	Argentina	male	intact	2012-08-19	Beagle	15.95	7	13.75	519	Dry	Satiety Weight Management Dry	2015-03-25	3	2015-04-20	0	0	-1	-0.55	3.71429	-0.897436	506	-149	70.864	-20.867	-0.05	-0.30303	1.85714	-0.16317
1835177	1511525	Argentina	male	intact	2012-08-19	Beagle	15.85	7	13.75	425	Dry	Satiety Weight Management Dry	2015-03-25	4	2015-05-08	0	1	-1	-0.65	6.28571	-0.626722	506	-149	70.864	-20.867	-0.1	-0.606061	2.57143	-0.23569
1835177	1511525	Argentina	male	intact	2012-08-19	Beagle	15	7	13.75	385	Dry	Satiety Weight Management Dry	2015-03-25	5	2015-06-12	1	1	-1	-1.5	11.2857	-0.805524	506	-149	70.864	-20.867	-0.85	-5.15152	5	-1.0303
1835190	1511545	USA	male	neutered	2012-03-24	Medium	10.8863	7	8.3734	347	Mix feeding	wet product : Satiety Weight Management Canine / dry product : Satiety Small Dog	2015-03-25	1	2015-03-26	0	0	-1	0	0	#N/A	347	0	70.494	0	0	0	0
1835190	1511545	USA	male	neutered	2012-03-24	Medium	10.3874	7	8.3734	347	Mix feeding	wet product : Satiety Weight Management Canine / dry product : Satiety Small Dog	2015-03-25	2	2015-04-08	1	1	0	-0.498957	1.85714	-2.46795	347	0	70.494	0	-0.498957	-4.58333	1.85714	-2.46795
1835190	1511545	USA	male	neutered	2012-03-24	Medium	10.2513	7	8.3734	347	Mix feeding	wet product : Satiety Weight Management Canine / dry product : Satiety Small Dog	2015-03-25	3	2015-04-22	1	-1	0	-0.635036	3.85714	-1.51235	347	0	70.494	0	-0.136079	-1.25	2	-0.625
1835190	1511545	USA	male	neutered	2012-03-24	Medium	9.66162	7	8.3734	347	Mix feeding	wet product : Satiety Weight Management Canine / dry product : Satiety Small Dog	2015-03-25	4	2015-05-20	0	0	0	-1.22471	7.85714	-1.43182	347	0	70.494	0	-0.589676	-5.41667	4	-1.35417
1835190	1511545	USA	male	neutered	2012-03-24	Medium	9.02658	7	8.3734	347	Dry	Satiety Weight Management Dry	2015-03-25	5	2015-06-17	0	0	0	-1.85975	11.8571	-1.44076	347	0	70.494	0	-0.635036	-5.83333	4	-1.45833
1835210	1488111	USA	female	neutered	2008-03-24	German Shepherd Dog	34.3827	7	26.4492	706	Dry	Satiety Weight Management Dry	2015-03-26	1	2015-03-26	1	1	-3	0	0	#N/A	821.5	154	70.436	13.204	0	0	0
1835210	1488111	USA	female	neutered	2008-03-24	German Shepherd Dog	30.8446	7	26.4492	783	Dry	Satiety Weight Management Dry	2015-03-26	2	2015-04-08	1	1	-1	-3.53806	1.85714	-5.5409	821.5	154	70.436	13.204	-3.53806	-10.2902	1.85714	-5.5409
1835210	1488111	USA	female	neutered	2008-03-24	German Shepherd Dog	29.9828	7	26.4492	860	Dry	Satiety Weight Management Dry	2015-03-26	3	2015-04-22	1	1	-1	-4.39989	3.85714	-3.3177	821.5	154	70.436	13.204	-0.861834	-2.5066	2	-1.2533
1835210	1488111	USA	female	neutered	2008-03-24	German Shepherd Dog	30.0281	7	26.4492	860	Dry	Satiety Weight Management Dry	2015-03-26	4	2015-05-21	1	1	0	-4.35453	8	-1.58311	821.5	154	70.436	13.204	0.0453597	0.131926	4.14286	0.0318442
1835210	1488111	USA	female	neutered	2008-03-24	German Shepherd Dog	29.3477	7	26.4492	860	Dry	Satiety Weight Management Dry	2015-03-26	5	2015-06-22	1	1	0	-5.03493	12.5714	-1.16485	821.5	154	70.436	13.204	-0.680396	-1.97889	4.57143	-0.432883
1835220	1120279	Mexico	male	neutered	2008-03-19	Labrador Retriever	41	7	34.17	1135	Dry	Satiety Support	2015-03-26	1	2015-03-26	-1	0	0	0	0	#N/A	1088.33	-140	77.007	-9.906	0	0	0
1835220	1120279	Mexico	male	neutered	2008-03-19	Labrador Retriever	41	7	34.17	1135	Dry	Satiety Support	2015-03-26	2	2015-04-11	0	0	-1	0	2.28571	0	1088.33	-140	77.007	-9.906	0	0	2.28571	0
1835220	1120279	Mexico	male	neutered	2008-03-19	Labrador Retriever	40.7	7	34.17	1135	Dry	Satiety Support	2015-03-26	3	2015-04-25	0	0	-2	-0.3	4.28571	-0.170732	1088.33	-140	77.007	-9.906	-0.3	-0.731707	2	-0.365854
1835220	1120279	Mexico	male	neutered	2008-03-19	Labrador Retriever	39.6	7	34.17	995	Dry	Satiety Support	2015-03-26	4	2015-05-23	0	0	-1	-1.4	8.28571	-0.412111	1088.33	-140	77.007	-9.906	-1.1	-2.68293	4	-0.670732
1835220	1120279	Mexico	male	neutered	2008-03-19	Labrador Retriever	38.4	7	34.17	995	Dry	Satiety Support	2015-03-26	5	2015-06-27	0	0	-1	-2.6	13.2857	-0.477314	1088.33	-140	77.007	-9.906	-1.2	-2.92683	5	-0.585366
1835681	1515214	USA	male	neutered	2007-01-07	Maxi	43.1824	8	29.4838	891	Mix feeding	wet product : Satiety Weight Management Canine / dry product : Satiety Weight Management Dry	2015-03-26	1	2015-03-26	-1	0	0	0	0	#N/A	881.667	-28	69.681	-2.213	0	0	0
1835681	1515214	USA	male	neutered	2007-01-07	Maxi	42.0031	8	29.4838	891	Mix feeding	wet product : Satiety Weight Management Canine / dry product : Satiety Weight Management Dry	2015-03-26	2	2015-04-10	0	0	-1	-1.17935	2.14286	-1.27451	881.667	-28	69.681	-2.213	-1.17935	-2.73109	2.14286	-1.27451
1835681	1515214	USA	male	neutered	2007-01-07	Maxi	40.9145	8	29.4838	891	Mix feeding	wet product : Satiety Weight Management Canine / dry product : Satiety Weight Management Dry	2015-03-26	3	2015-04-24	0	0	0	-2.26799	4.14286	-1.26775	881.667	-28	69.681	-2.213	-1.08863	-2.52101	2	-1.2605
1835681	1515214	USA	male	neutered	2007-01-07	Maxi	38.964	8	29.4838	863	Mix feeding	wet product : Satiety Weight Management Canine / dry product : Satiety Weight Management Dry	2015-03-26	4	2015-05-21	0	0	-1	-4.21845	8	-1.22111	881.667	-28	69.681	-2.213	-1.95047	-4.51681	3.85714	-1.17102
1835681	1515214	USA	male	neutered	2007-01-07	Maxi	37.4218	8	29.4838	863	Mix feeding	wet product : Satiety Weight Management Canine / dry product : Satiety Weight Management Dry	2015-03-26	5	2015-06-18	1	1	-1	-5.76068	12	-1.11169	881.667	-28	69.681	-2.213	-1.54223	-3.57143	4	-0.892857
1836023	1502313	USA	male	neutered	2012-03-26	Siberian Husky	33.4301	7	27.8599	854	Dry	Satiety Weight Management Dry	2015-03-26	1	2015-03-26	1	1	0	0	0	#N/A	711.667	-227	58.687	-18.719	0	0	0
1836023	1502313	USA	male	neutered	2012-03-26	Siberian Husky	33.5662	7	27.8599	774	Dry	Satiety Weight Management Dry	2015-03-26	2	2015-04-09	1	1	-1	0.136079	2	0.203528	711.667	-227	58.687	-18.719	0.136079	0.407056	2	0.203528
1836023	1502313	USA	male	neutered	2012-03-26	Siberian Husky	33.5662	7	27.8599	694	Dry	Satiety Weight Management Dry	2015-03-26	3	2015-04-23	0	0	-2	0.136079	4	0.101764	711.667	-227	58.687	-18.719	0	0	2	0
1836023	1502313	USA	male	neutered	2012-03-26	Siberian Husky	32.8858	7	27.8599	627	Dry	Satiety Weight Management Dry	2015-03-26	4	2015-05-21	0	0	-1	-0.544316	8	-0.203528	711.667	-227	58.687	-18.719	-0.680396	-2.03528	4	-0.50882
1836023	1502313	USA	male	neutered	2012-03-26	Siberian Husky	32.4322	7	27.8599	561	Dry	Satiety Weight Management Dry	2015-03-26	5	2015-06-16	1	0	-1	-0.997913	11.7143	-0.254823	711.667	-227	58.687	-18.719	-0.453597	-1.35685	3.71429	-0.365306
1836480	1515198	Czech Republic	female	intact	2009-09-08	Rhodesian Ridgeback	42.2	7	35.17	1017	Dry	Satiety Weight Management Dry	2015-03-27	1	2015-03-27	0	0	-1	0	0	#N/A	847.833	-270	58.706	-18.695	0	0	0
1836480	1515198	Czech Republic	female	intact	2009-09-08	Rhodesian Ridgeback	41.6	7	35.17	922	Dry	Satiety Weight Management Dry	2015-03-27	2	2015-04-13	0	0	0	-0.6	2.42857	-0.585447	847.833	-270	58.706	-18.695	-0.6	-1.4218	2.42857	-0.585447
1836480	1515198	Czech Republic	female	intact	2009-09-08	Rhodesian Ridgeback	41.3	7	35.17	827	Dry	Satiety Weight Management Dry	2015-03-27	3	2015-04-27	0	0	0	-0.9	4.42857	-0.481578	847.833	-270	58.706	-18.695	-0.3	-0.7109	2	-0.35545
1836480	1515198	Czech Republic	female	intact	2009-09-08	Rhodesian Ridgeback	38.7	7	35.17	747	Dry	Satiety Weight Management Dry	2015-03-27	4	2015-05-25	0	0	0	-3.5	8.42857	-0.984015	847.833	-270	58.706	-18.695	-2.6	-6.16114	4	-1.54028
1836480	1515198	Czech Republic	female	intact	2009-09-08	Rhodesian Ridgeback	37.7	7	35.17	668	Dry	Satiety Weight Management Dry	2015-03-27	5	2015-07-03	1	1	0	-4.5	14	-0.761679	847.833	-270	58.706	-18.695	-1	-2.36967	5.57143	-0.425325
1836485	1507159	Portugal	female	intact	2007-05-01	Maxi	39.5	7	30.38	911	Mix feeding	wet product : Satiety Weight Management Canine / dry product : Satiety Weight Management Dry	2015-03-27	1	2015-03-27	1	1	0	0	0	#N/A	911	0	70.401	0	0	0	0
1836485	1507159	Portugal	female	intact	2007-05-01	Maxi	38.25	7	30.38	911	Mix feeding	wet product : Satiety Weight Management Canine / dry product : Satiety Weight Management Dry	2015-03-27	2	2015-04-17	1	1	0	-1.25	3	-1.05485	911	0	70.401	0	-1.25	-3.16456	3	-1.05485
1836485	1507159	Portugal	female	intact	2007-05-01	Maxi	37.05	7	30.38	911	Mix feeding	wet product : Satiety Weight Management Canine / dry product : Satiety Weight Management Dry	2015-03-27	3	2015-05-04	1	1	0	-2.45	5.42857	-1.14257	911	0	70.401	0	-1.2	-3.03797	2.42857	-1.25093
1836485	1507159	Portugal	female	intact	2007-05-01	Maxi	36	7	30.38	911	Mix feeding	wet product : Satiety Weight Management Canine / dry product : Satiety Weight Management Dry	2015-03-27	4	2015-05-25	1	1	0	-3.5	8.42857	-1.05128	911	0	70.401	0	-1.05	-2.65823	3	-0.886076
1836485	1507159	Portugal	female	intact	2007-05-01	Maxi	34.4	7	30.38	911	Mix feeding	wet product : Satiety Weight Management Canine / dry product : Satiety Weight Management Dry	2015-03-27	5	2015-06-18	1	1	0	-5.1	11.8571	-1.08891	911	0	70.401	0	-1.6	-4.05063	3.42857	-1.18143
1836492	1507159	Portugal	female	intact	2007-05-01	Maxi	37.9	8	29.15	884	Mix feeding	wet product : Satiety Weight Management Canine / dry product : Satiety Weight Management Dry	2015-03-27	1	2015-03-27	0	0	0	0	0	#N/A	690.5	-304	55.041	-24.232	0	0	0
1836492	1507159	Portugal	female	intact	2007-05-01	Maxi	37.05	8	29.15	801	Mix feeding	wet product : Satiety Weight Management Canine / dry product : Satiety Weight Management Dry	2015-03-27	2	2015-04-17	0	0	0	-0.85	3	-0.747581	690.5	-304	55.041	-24.232	-0.85	-2.24274	3	-0.747581
1836492	1507159	Portugal	female	intact	2007-05-01	Maxi	36.55	8	29.15	649	Mix feeding	wet product : Satiety Weight Management Canine / dry product : Satiety Weight Management Dry	2015-03-27	3	2015-05-04	0	0	0	-1.35	5.42857	-0.656159	690.5	-304	55.041	-24.232	-0.5	-1.31926	2.42857	-0.543225
1836492	1507159	Portugal	female	intact	2007-05-01	Maxi	35.85	8	29.15	580	Mix feeding	wet product : Satiety Weight Management Canine / dry product : Satiety Weight Management Dry	2015-03-27	4	2015-05-25	1	0	0	-2.05	8.42857	-0.641742	690.5	-304	55.041	-24.232	-0.7	-1.84697	3	-0.615655
1836492	1507159	Portugal	female	intact	2007-05-01	Maxi	32.95	8	29.15	580	Mix feeding	wet product : Satiety Weight Management Canine / dry product : Satiety Weight Management Dry	2015-03-27	5	2015-06-18	1	1	0	-4.95	11.8571	-1.1015	690.5	-304	55.041	-24.232	-2.9	-7.65172	3.42857	-2.23175
1836692	1507159	Portugal	male	intact	2007-05-01	Maxi	50.1	9	35.79	1175	Mix feeding	wet product : Satiety Weight Management Canine / dry product : Satiety Weight Management Dry	2015-03-27	1	2015-03-27	0	0	-1	0	0	#N/A	1355.17	242	92.613	16.538	0	0	0
1836692	1507159	Portugal	male	intact	2007-05-01	Maxi	43.3	9	35.79	1288	Mix feeding	wet product : Satiety Weight Management Canine / dry product : Satiety Weight Management Dry	2015-03-27	2	2015-04-17	1	0	-1	-6.8	3	-4.52428	1355.17	242	92.613	16.538	-6.8	-13.5729	3	-4.52428
1836692	1507159	Portugal	male	intact	2007-05-01	Maxi	40.9	9	35.79	1417	Mix feeding	wet product : Satiety Weight Management Canine / dry product : Satiety Weight Management Dry	2015-03-27	3	2015-05-04	0	0	-1	-9.2	5.42857	-3.38271	1355.17	242	92.613	16.538	-2.4	-4.79042	2.42857	-1.97253
1836692	1507159	Portugal	male	intact	2007-05-01	Maxi	39.15	9	35.79	1417	Mix feeding	wet product : Satiety Weight Management Canine / dry product : Satiety Weight Management Dry	2015-03-27	4	2015-05-25	1	0	-1	-10.95	8.42857	-2.59312	1355.17	242	92.613	16.538	-1.75	-3.49301	3	-1.16434
1836692	1507159	Portugal	male	intact	2007-05-01	Maxi	37.5	9	35.79	1417	Mix feeding	wet product : Satiety Weight Management Canine / dry product : Satiety Weight Management Dry	2015-03-27	5	2015-06-18	1	1	0	-12.6	11.8571	-2.12106	1355.17	242	92.613	16.538	-1.65	-3.29341	3.42857	-0.960579
1836708	1512747	USA	female	neutered	2008-03-14	others	5.89676	7	4.21392	178	Dry	Satiety Small Dog	2015-03-27	1	2015-03-27	-1	0	0	0	0	#N/A	178	0	60.521	0	0	0	0
1836708	1512747	USA	female	neutered	2008-03-14	others	5.76068	7	4.21392	178	Dry	Satiety Small Dog	2015-03-27	2	2015-04-10	-1	0	-1	-0.136079	2	-1.15385	178	0	60.521	0	-0.136079	-2.30769	2	-1.15385
1836708	1512747	USA	female	neutered	2008-03-14	others	5.6246	7	4.21392	178	Dry	Satiety Small Dog	2015-03-27	3	2015-04-25	-1	0	-1	-0.272158	4.14286	-1.11406	178	0	60.521	0	-0.136079	-2.30769	2.14286	-1.07692
1836708	1512747	USA	female	neutered	2008-03-14	others	5.21637	7	4.21392	178	Dry	Satiety Small Dog	2015-03-27	4	2015-05-22	-1	0	-1	-0.680396	8	-1.44231	178	0	60.521	0	-0.408237	-6.92308	3.85714	-1.79487
1836708	1512747	USA	female	neutered	2008-03-14	others	5.08029	7	4.21392	178	Dry	Satiety Small Dog	2015-03-27	5	2015-06-26	-1	0	-1	-0.816475	13	-1.06509	178	0	60.521	0	-0.136079	-2.30769	5	-0.461538
1836795	1512747	USA	male	neutered	2013-07-31	Medium	19.9583	8	15.3543	547	Dry	Satiety Weight Management Dry	2015-03-27	1	2015-03-27	1	1	-2	0	0	#N/A	503.667	-52	64.934	-6.704	0	0	0
1836795	1512747	USA	male	neutered	2013-07-31	Medium	19.6408	8	15.3543	495	Dry	Satiety Weight Management Dry	2015-03-27	2	2015-04-10	1	1	-1	-0.317518	2	-0.795455	503.667	-52	64.934	-6.704	-0.317518	-1.59091	2	-0.795455
1836795	1512747	USA	male	neutered	2013-07-31	Medium	19.0964	8	15.3543	495	Dry	Satiety Weight Management Dry	2015-03-27	3	2015-04-24	1	1	-1	-0.861834	4	-1.07955	503.667	-52	64.934	-6.704	-0.544316	-2.72727	2	-1.36364
1836795	1512747	USA	male	neutered	2013-07-31	Medium	17.8264	8	15.3543	495	Dry	Satiety Weight Management Dry	2015-03-27	4	2015-05-21	1	0	-1	-2.13191	7.85714	-1.3595	503.667	-52	64.934	-6.704	-1.27007	-6.36364	3.85714	-1.64983
1836795	1512747	USA	male	neutered	2013-07-31	Medium	17.4635	8	15.3543	444	Dry	Satiety Weight Management Dry	2015-03-27	5	2015-06-27	1	0	-1	-2.49478	13.1429	-0.951087	503.667	-52	64.934	-6.704	-0.362878	-1.81818	5.28571	-0.34398
1836802	1507104	USA	male	neutered	2007-03-26	Maxi	34.936	8	29.1119	883	Dry	Satiety Weight Management Dry	2015-03-27	1	2015-03-27	1	0	0	0	0	#N/A	800	-166	63.832	-13.245	0	0	0
1836802	1507104	USA	male	neutered	2007-03-26	Maxi	33.5753	8	29.1119	883	Dry	Satiety Weight Management Dry	2015-03-27	2	2015-04-11	1	1	0	-1.36079	2.14286	-1.81771	800	-166	63.832	-13.245	-1.36079	-3.89509	2.14286	-1.81771
1836802	1507104	USA	male	neutered	2007-03-26	Maxi	33.5662	8	29.1119	800	Dry	Satiety Weight Management Dry	2015-03-27	3	2015-04-25	1	1	0	-1.36986	4.14286	-0.946463	800	-166	63.832	-13.245	-0.00907194	-0.0259673	2	-0.0129836
1836802	1507104	USA	male	neutered	2007-03-26	Maxi	32.2961	8	29.1119	717	Dry	Satiety Weight Management Dry	2015-03-27	4	2015-05-30	1	1	0	-2.63993	9.14286	-0.82649	800	-166	63.832	-13.245	-1.27007	-3.63542	5	-0.727084
1836802	1507104	USA	male	neutered	2007-03-26	Maxi	32.659	8	29.1119	883	Dry	Satiety Weight Management Dry	2015-03-27	5	2015-06-19	1	1	0	-2.27706	12	-0.543149	800	-166	63.832	-13.245	0.362878	1.03869	2.85714	0.363542
1836806	1491879	USA	male	neutered	2010-03-23	Golden Retriever	40.0526	8	30.8083	921	Dry	Satiety Weight Management Dry	2015-03-27	1	2015-03-27	0	1	0	0	0	#N/A	#N/A	-173	#N/A	-13.23	0	0	0
1836806	1491879	USA	male	neutered	2010-03-23	Golden Retriever	#N/A	8	30.8083	#N/A			2015-03-27	2	2015-04-10	0	1	0	#N/A	2	#N/A	#N/A	-173	#N/A	-13.23	#N/A	#N/A	2
1836806	1491879	USA	male	neutered	2010-03-23	Golden Retriever	38.7825	8	30.8083	835	Dry	Satiety Weight Management Dry	2015-03-27	3	2015-04-24	0	1	-2	-1.27007	4	-0.792752	#N/A	-173	#N/A	-13.23	#N/A	#N/A	2
1836806	1491879	USA	male	neutered	2010-03-23	Golden Retriever	38.5104	8	30.8083	748	Dry	Satiety Weight Management Dry	2015-03-27	4	2015-05-27	0	1	-1	-1.54223	8.71429	-0.441862	#N/A	-173	#N/A	-13.23	-0.272158	-0.679502	4.71429	-0.144137
1836806	1491879	USA	male	neutered	2010-03-23	Golden Retriever	36.6053	8	30.8083	677	Dry	Satiety Weight Management Dry	2015-03-27	5	2015-06-27	0	1	-3	-3.44734	13.1429	-0.654882	#N/A	-173	#N/A	-13.23	-1.90511	-4.75651	4.42857	-1.07405
1836874	1522590	Spain	female	neutered	2011-06-15	Chihuahua	3.5	9	2.92	136	Dry	Satiety Weight Management Dry	2015-03-28	1	2015-03-28	1	1	0	0	0	#N/A	123.333	-25	55.213	-11.192	0	0	0
1836874	1522590	Spain	female	neutered	2011-06-15	Chihuahua	3.6	9	2.92	136	Dry	Satiety Weight Management Dry	2015-03-28	2	2015-04-16	1	1	-1	0.1	2.71429	1.05263	123.333	-25	55.213	-11.192	0.1	2.85714	2.71429	1.05263
1836874	1522590	Spain	female	neutered	2011-06-15	Chihuahua	3.5	9	2.92	123	Dry	Satiety Weight Management Dry	2015-03-28	3	2015-05-05	1	1	-1	0	5.42857	0	123.333	-25	55.213	-11.192	-0.1	-2.85714	2.71429	-1.05263
1836874	1522590	Spain	female	neutered	2011-06-15	Chihuahua	3.4	9	2.92	111	Dry	Satiety Weight Management Dry	2015-03-28	4	2015-05-22	1	1	-1	-0.1	7.85714	-0.363636	123.333	-25	55.213	-11.192	-0.1	-2.85714	2.42857	-1.17647
1836874	1522590	Spain	female	neutered	2011-06-15	Chihuahua	3.45	9	2.92	101	Dry	Satiety Weight Management Dry	2015-03-28	5	2015-06-15	1	1	-1	-0.05	11.2857	-0.126582	123.333	-25	55.213	-11.192	0.05	1.42857	3.42857	0.416667
1836909	1514475	Chile	female	neutered	2010-03-28	Yorkshire Terrier	8	9	6.15	237	Dry	Satiety Weight Management Dry	2015-03-28	1	2015-03-28	0	0	-1	0	0	#N/A	204.667	-43	52.407	-11.011	0	0	0
1836909	1514475	Chile	female	neutered	2010-03-28	Yorkshire Terrier	7.8	9	6.15	215	Dry	Satiety Weight Management Dry	2015-03-28	2	2015-04-20	-1	0	-2	-0.2	3.28571	-0.76087	204.667	-43	52.407	-11.011	-0.2	-2.5	3.28571	-0.76087
1836909	1514475	Chile	female	neutered	2010-03-28	Yorkshire Terrier	7.7	9	6.15	194	Dry	Satiety Weight Management Dry	2015-03-28	3	2015-05-06	-1	1	-1	-0.3	5.57143	-0.673077	204.667	-43	52.407	-11.011	-0.1	-1.25	2.28571	-0.546875
1836909	1514475	Chile	female	neutered	2010-03-28	Yorkshire Terrier	7.2	9	6.15	194	Dry	Satiety Weight Management Dry	2015-03-28	4	2015-05-27	0	1	0	-0.8	8.57143	-1.16667	204.667	-43	52.407	-11.011	-0.5	-6.25	3	-2.08333
1836909	1514475	Chile	female	neutered	2010-03-28	Yorkshire Terrier	6.9	9	6.15	194	Dry	Satiety Weight Management Dry	2015-03-28	5	2015-06-08	0	0	0	-1.1	10.2857	-1.33681	204.667	-43	52.407	-11.011	-0.3	-3.75	1.71429	-2.1875
1836910	1514475	Chile	female	neutered	2010-03-28	Yorkshire Terrier	7.2	7	5.54	219	Dry	Satiety Weight Management Dry	2015-03-28	1	2015-03-28	1	0	0	0	0	#N/A	189	-40	52.339	-11.077	0	0	0
1836910	1514475	Chile	female	neutered	2010-03-28	Yorkshire Terrier	7	7	5.54	199	Dry	Satiety Weight Management Dry	2015-03-28	2	2015-04-20	-1	-1	-2	-0.2	3.28571	-0.845411	189	-40	52.339	-11.077	-0.2	-2.77778	3.28571	-0.845411
1836910	1514475	Chile	female	neutered	2010-03-28	Yorkshire Terrier	7.1	7	5.54	179	Dry	Satiety Weight Management Dry	2015-03-28	3	2015-05-06	0	0	-1	-0.1	5.57143	-0.249288	189	-40	52.339	-11.077	0.1	1.38889	2.28571	0.607639
1836910	1514475	Chile	female	neutered	2010-03-28	Yorkshire Terrier	6.5	7	5.54	179	Dry	Satiety Weight Management Dry	2015-03-28	4	2015-05-27	1	1	-1	-0.7	8.57143	-1.13426	189	-40	52.339	-11.077	-0.6	-8.33333	3	-2.77778
1836910	1514475	Chile	female	neutered	2010-03-28	Yorkshire Terrier	6.1	7	5.54	179	Dry	Satiety Weight Management Dry	2015-03-28	5	2015-06-08	1	1	-1	-1.1	10.2857	-1.48534	189	-40	52.339	-11.077	-0.4	-5.55556	1.71429	-3.24074
1837181	1511545	USA	male	neutered	2009-03-25	Medium	15.5584	7	11.9659	453	Dry	Satiety Small Dog	2015-03-28	1	2015-03-28	-1	-1	-3	0	0	#N/A	418	-42	64.971	-6.528	0	0	0
1837181	1511545	USA	male	neutered	2009-03-25	Medium	15.3769	7	11.9659	411	Dry	Satiety Weight Management Dry	2015-03-28	2	2015-04-11	0	1	-2	-0.181439	2	-0.58309	418	-42	64.971	-6.528	-0.181439	-1.16618	2	-0.58309
1837181	1511545	USA	male	neutered	2009-03-25	Medium	14.6058	7	11.9659	411	Dry	Satiety Weight Management Dry	2015-03-28	3	2015-04-25	1	1	-1	-0.952554	4	-1.53061	418	-42	64.971	-6.528	-0.771115	-4.95627	2	-2.47813
1837181	1511545	USA	male	neutered	2009-03-25	Medium	13.4718	7	11.9659	411	Dry	Satiety Weight Management Dry	2015-03-28	4	2015-05-23	1	1	0	-2.08655	8	-1.67638	418	-42	64.971	-6.528	-1.13399	-7.28863	4	-1.82216
1837181	1511545	USA	male	neutered	2009-03-25	Medium	12.3832	7	11.9659	411	Dry	Satiety Weight Management Dry	2015-03-28	5	2015-06-20	1	1	0	-3.17518	12	-1.70068	418	-42	64.971	-6.528	-1.08863	-6.99708	4	-1.74927
1837185	1511545	USA	female	neutered	2008-03-25	MINI	10.7049	7	8.23279	295	Dry	Satiety Small Dog	2015-03-28	1	2015-03-28	-1	-1	-1	0	0	#N/A	277	-27	56.993	-5.555	0	0	0
1837185	1511545	USA	female	neutered	2008-03-25	MINI	10.4826	7	8.23279	295	Dry	Satiety Weight Management Dry	2015-03-28	2	2015-04-11	0	1	-2	-0.222263	2	-1.03814	277	-27	56.993	-5.555	-0.222263	-2.07627	2	-1.03814
1837185	1511545	USA	female	neutered	2008-03-25	MINI	10.5235	7	8.23279	268	Dry	Satiety Weight Management Dry	2015-03-28	3	2015-04-25	1	1	-1	-0.181439	4	-0.423729	277	-27	56.993	-5.555	0.0408237	0.381356	2	0.190678
1837185	1511545	USA	female	neutered	2008-03-25	MINI	9.70698	7	8.23279	268	Dry	Satiety Weight Management Dry	2015-03-28	4	2015-05-23	1	1	0	-0.997913	8	-1.16525	277	-27	56.993	-5.555	-0.816475	-7.62712	4	-1.90678
1837185	1511545	USA	female	neutered	2008-03-25	MINI	9.48018	7	8.23279	241	Dry	Satiety Weight Management Dry	2015-03-28	5	2015-06-20	1	1	0	-1.22471	12	-0.95339	277	-27	56.993	-5.555	-0.226799	-2.11864	4	-0.529661
1837401	1512747	USA	male	neutered	2011-03-28	Labrador Retriever	55.7924	7	46.4937	1254	Dry	Satiety Weight Management Dry	2015-03-28	1	2015-03-28	0	0	0	0	0	#N/A	1045	-333	58.691	-18.702	0	0	0
1837401	1512747	USA	male	neutered	2011-03-28	Labrador Retriever	54.8852	7	46.4937	1136	Dry	Satiety Weight Management Dry	2015-03-28	2	2015-04-14	0	0	0	-0.907194	2.42857	-0.669536	1045	-333	58.691	-18.702	-0.907194	-1.62602	2.42857	-0.669536
1837401	1512747	USA	male	neutered	2011-03-28	Labrador Retriever	54.8852	7	46.4937	1019	Dry	Satiety Weight Management Dry	2015-03-28	3	2015-04-28	0	1	-1	-0.907194	4.42857	-0.367165	1045	-333	58.691	-18.702	0	0	2	0
1837401	1512747	USA	male	neutered	2011-03-28	Labrador Retriever	53.5244	7	46.4937	921	Dry	Satiety Weight Management Dry	2015-03-28	4	2015-05-26	0	1	-1	-2.26799	8.42857	-0.482293	1045	-333	58.691	-18.702	-1.36079	-2.43902	4	-0.609756
1837401	1512747	USA	male	neutered	2011-03-28	Labrador Retriever	53.5244	7	46.4937	823	Dry	Satiety Weight Management Dry	2015-03-28	5	2015-06-29	0	1	-1	-2.26799	13.2857	-0.305971	1045	-333	58.691	-18.702	0	0	4.85714	0
1837853	1499563	Hungary	male	neutered	2005-10-01	Yorkshire Terrier	6.5	8	5	236	Dry	Satiety Small Dog	2015-03-29	1	2015-03-29	-1	1	0	0	0	#N/A	210.333	-44	62.904	-13.159	0	0	0
1837853	1499563	Hungary	male	neutered	2005-10-01	Yorkshire Terrier	6.4	8	5	214	Dry	Satiety Weight Management Dry	2015-03-29	2	2015-04-14	1	1	-1	-0.1	2.28571	-0.673077	210.333	-44	62.904	-13.159	-0.1	-1.53846	2.28571	-0.673077
1837853	1499563	Hungary	male	neutered	2005-10-01	Yorkshire Terrier	6.2	8	5	214	Dry	Satiety Weight Management Dry	2015-03-29	3	2015-04-29	0	0	-2	-0.3	4.42857	-1.04218	210.333	-44	62.904	-13.159	-0.2	-3.07692	2.14286	-1.4359
1837853	1499563	Hungary	male	neutered	2005-10-01	Yorkshire Terrier	6	8	5	192	Dry	Satiety Weight Management Dry	2015-03-29	4	2015-05-29	1	0	-2	-0.5	8.71429	-0.882724	210.333	-44	62.904	-13.159	-0.2	-3.07692	4.28571	-0.717949
1837853	1499563	Hungary	male	neutered	2005-10-01	Yorkshire Terrier	6.2	8	5	173	Dry	Satiety Weight Management Dry	2015-03-29	5	2015-06-27	1	1	-2	-0.3	12.8571	-0.358974	210.333	-44	62.904	-13.159	0.2	3.07692	4.14286	0.742706
1838068	992342	Netherlands	male	neutered	2005-01-18	Border Collie	33.2	7	23.71	757	Dry	Satiety Weight Management Dry	2015-03-30	1	2015-03-30	0	1	-3	0	0	#N/A	757	0	70.453	0	0	0	0
1838068	992342	Netherlands	male	neutered	2005-01-18	Border Collie	31.9	7	23.71	757	Dry	Satiety Weight Management Dry	2015-03-30	2	2015-04-10	0	1	-3	-1.3	1.57143	-2.49179	757	0	70.453	0	-1.3	-3.91566	1.57143	-2.49179
1838068	992342	Netherlands	male	neutered	2005-01-18	Border Collie	31	7	23.71	757	Dry	Satiety Weight Management Dry	2015-03-30	3	2015-04-29	1	1	-3	-2.2	4.28571	-1.54618	757	0	70.453	0	-0.9	-2.71084	2.71429	-0.998732
1838068	992342	Netherlands	male	neutered	2005-01-18	Border Collie	30.7	7	23.71	757	Dry	Satiety Weight Management Dry	2015-03-30	4	2015-05-20	1	1	-3	-2.5	7.28571	-1.03355	757	0	70.453	0	-0.3	-0.903614	3	-0.301205
1838068	992342	Netherlands	male	neutered	2005-01-18	Border Collie	29.7	7	23.71	757	Dry	Satiety Weight Management Dry	2015-03-30	5	2015-06-10	0	0	-3	-3.5	10.2857	-1.02493	757	0	70.453	0	-1	-3.01205	3	-1.00402
1838344	1280111	Italy	female	neutered	2008-03-30	Medium	16.7	8	13.92	436	Dry	Satiety Weight Management Dry	2015-03-30	1	2015-03-30	0	0	-2	0	0	#N/A	396.833	-47	55.065	-6.522	0	0	0
1838344	1280111	Italy	female	neutered	2008-03-30	Medium	16.6	8	13.92	389	Dry	Satiety Weight Management Dry	2015-03-30	2	2015-04-13	0	0	-2	-0.1	2	-0.299401	396.833	-47	55.065	-6.522	-0.1	-0.598802	2	-0.299401
1838344	1280111	Italy	female	neutered	2008-03-30	Medium	15	8	13.92	389	Dry	Satiety Weight Management Dry	2015-03-30	3	2015-05-07	0	0	-1	-1.7	5.42857	-1.8752	396.833	-47	55.065	-6.522	-1.6	-9.58084	3.42857	-2.79441
1838344	1280111	Italy	female	neutered	2008-03-30	Medium	14.6	8	13.92	389	Dry	Satiety Weight Management Dry	2015-03-30	4	2015-05-22	0	0	-1	-2.1	7.57143	-1.66083	396.833	-47	55.065	-6.522	-0.4	-2.39521	2.14286	-1.11776
1838344	1280111	Italy	female	neutered	2008-03-30	Medium	14	8	13.92	389	Dry	Satiety Weight Management Dry	2015-03-30	5	2015-06-25	1	0	0	-2.7	12.4286	-1.30085	396.833	-47	55.065	-6.522	-0.6	-3.59281	4.85714	-0.739697
1838624	767624	Netherlands	male	neutered	2010-03-30	Labrador Retriever	46	7	38.33	1085	Dry	Satiety Weight Management Dry	2015-03-30	1	2015-03-30	0	1	-3	0	0	#N/A	904.333	-288	58.705	-18.696	0	0	0
1838624	767624	Netherlands	male	neutered	2010-03-30	Labrador Retriever	46	7	38.33	983	Dry	Satiety Weight Management Dry	2015-03-30	2	2015-04-13	0	0	-3	0	2	0	904.333	-288	58.705	-18.696	0	0	2	0
1838624	767624	Netherlands	male	neutered	2010-03-30	Labrador Retriever	45	7	38.33	882	Dry	Satiety Weight Management Dry	2015-03-30	3	2015-05-04	0	0	-3	-1	5	-0.434783	904.333	-288	58.705	-18.696	-1	-2.17391	3	-0.724638
1838624	767624	Netherlands	male	neutered	2010-03-30	Labrador Retriever	43.8	7	38.33	797	Dry	Satiety Weight Management Dry	2015-03-30	4	2015-05-26	0	0	-3	-2.2	8.14286	-0.587338	904.333	-288	58.705	-18.696	-1.2	-2.6087	3.14286	-0.83004
1838624	767624	Netherlands	male	neutered	2010-03-30	Labrador Retriever	41	7	38.33	882	Dry	Satiety Weight Management Dry	2015-03-30	5	2015-06-29	0	0	-3	-5	13	-0.83612	904.333	-288	58.705	-18.696	-2.8	-6.08696	4.85714	-1.2532
1838627	1510442	Portugal	male	neutered	2012-03-25	Giant	42.6	9	35.5	1024	Dry	Satiety Weight Management Dry	2015-03-30	1	2015-03-30	1	1	-2	0	0	#N/A	992	-96	68.209	-6.601	0	0	0
1838627	1510442	Portugal	male	neutered	2012-03-25	Giant	41.55	9	35.5	1024	Dry	Satiety Weight Management Dry	2015-03-30	2	2015-04-13	1	1	-2	-1.05	2	-1.23239	992	-96	68.209	-6.601	-1.05	-2.46479	2	-1.23239
1838627	1510442	Portugal	male	neutered	2012-03-25	Giant	40.15	9	35.5	1024	Dry	Satiety Weight Management Dry	2015-03-30	3	2015-04-27	1	1	-2	-2.45	4	-1.43779	992	-96	68.209	-6.601	-1.4	-3.28638	2	-1.64319
1838627	1510442	Portugal	male	neutered	2012-03-25	Giant	39.4	9	35.5	928	Dry	Satiety Weight Management Dry	2015-03-30	4	2015-05-27	0	1	-3	-3.2	8.28571	-0.906589	992	-96	68.209	-6.601	-0.75	-1.76056	4.28571	-0.410798
1838627	1510442	Portugal	male	neutered	2012-03-25	Giant	37.95	9	35.5	832	Dry	Satiety Weight Management Dry	2015-03-30	5	2015-07-01	0	1	-3	-4.65	13.2857	-0.821596	992	-96	68.209	-6.601	-1.45	-3.40376	5	-0.680751
1838652	1524022	USA	female	neutered	2008-06-30	Labrador Retriever	44.8607	9	32.0421	815	Dry	Satiety Weight Management Dry	2015-03-30	1	2015-03-30	0	0	-1	0	0	#N/A	815	0	60.516	0	0	0	0
1838652	1524022	USA	female	neutered	2008-06-30	Labrador Retriever	42.7742	9	32.0421	815	Dry	Satiety Weight Management Dry	2015-03-30	2	2015-04-18	0	0	0	-2.08655	2.71429	-1.71359	815	0	60.516	0	-2.08655	-4.65116	2.71429	-1.71359
1838652	1524022	USA	female	neutered	2008-06-30	Labrador Retriever	40.6877	9	32.0421	815	Dry	Satiety Weight Management Dry	2015-03-30	3	2015-05-10	1	0	0	-4.17309	5.85714	-1.5882	815	0	60.516	0	-2.08655	-4.65116	3.14286	-1.47992
1838652	1524022	USA	female	neutered	2008-06-30	Labrador Retriever	39.5537	9	32.0421	815	Dry	Satiety Weight Management Dry	2015-03-30	4	2015-06-01	0	1	0	-5.30709	9	-1.31446	815	0	60.516	0	-1.13399	-2.52781	3.14286	-0.804302
1838652	1524022	USA	female	neutered	2008-06-30	Labrador Retriever	38.8733	9	32.0421	815	Dry	Satiety Weight Management Dry	2015-03-30	5	2015-06-24	0	0	0	-5.98748	12.2857	-1.08637	815	0	60.516	0	-0.680396	-1.51668	3.28571	-0.461599
1838678	1516940	USA	male	neutered	2010-09-03	Beagle	17.5088	9	13.4673	495	Dry	Satiety Weight Management Dry	2015-03-30	1	2015-03-30	1	1	-2	0	0	#N/A	413	-131	58.748	-18.634	0	0	0
1838678	1516940	USA	male	neutered	2010-09-03	Beagle	17.1913	9	13.4673	449	Dry	Satiety Weight Management Dry	2015-03-30	2	2015-04-13	1	1	-1	-0.317518	2	-0.906736	413	-131	58.748	-18.634	-0.317518	-1.81347	2	-0.906736
1838678	1516940	USA	male	neutered	2010-09-03	Beagle	17.0552	9	13.4673	403	Dry	Satiety Weight Management Dry	2015-03-30	3	2015-04-27	1	1	-1	-0.453597	4	-0.647668	413	-131	58.748	-18.634	-0.136079	-0.777202	2	-0.388601
1838678	1516940	USA	male	neutered	2010-09-03	Beagle	16.2841	9	13.4673	364	Dry	Satiety Weight Management Dry	2015-03-30	4	2015-05-27	1	1	-1	-1.22471	8.28571	-0.844202	413	-131	58.748	-18.634	-0.771115	-4.40415	4.28571	-1.02763
1838678	1516940	USA	male	neutered	2010-09-03	Beagle	15.8305	9	13.4673	325	Dry	Satiety Weight Management Dry	2015-03-30	5	2015-07-02	1	1	-1	-1.67831	13.4286	-0.713813	413	-131	58.748	-18.634	-0.453597	-2.59067	5.14286	-0.503742
1839374	767624	Netherlands	male	intact	2007-03-31	Beagle	20.3	7	16.92	670	Dry	Satiety Weight Management Dry	2015-03-31	1	2015-03-31	0	0	-3	0	0	#N/A	606	-128	72.639	-15.343	0	0	0
1839374	767624	Netherlands	male	intact	2007-03-31	Beagle	19.5	7	16.92	670	Dry	Satiety Weight Management Dry	2015-03-31	2	2015-04-14	0	0	-2	-0.8	2	-1.97044	606	-128	72.639	-15.343	-0.8	-3.94089	2	-1.97044
1839374	767624	Netherlands	male	intact	2007-03-31	Beagle	20.2	7	16.92	606	Dry	Satiety Weight Management Dry	2015-03-31	3	2015-05-04	0	0	0	-0.1	4.85714	-0.10142	606	-128	72.639	-15.343	0.7	3.44828	2.85714	1.2069
1839374	767624	Netherlands	male	intact	2007-03-31	Beagle	19.3	7	16.92	542	Dry	Satiety Weight Management Dry	2015-03-31	4	2015-05-26	0	0	0	-1	8	-0.615764	606	-128	72.639	-15.343	-0.9	-4.4335	3.14286	-1.41066
1839374	767624	Netherlands	male	intact	2007-03-31	Beagle	18.5	7	16.92	459	Dry	Satiety Weight Management Dry	2015-03-31	5	2015-06-26	1	0	0	-1.8	12.4286	-0.713436	606	-128	72.639	-15.343	-0.8	-3.94089	4.42857	-0.889878
1839409	1524022	USA	male	neutered	2011-10-28	Golden Retriever	38.3289	7	29.4838	891	Dry	Satiety Weight Management Dry	2015-03-31	1	2015-03-31	-1	0	-3	0	0	#N/A	891	0	70.419	0	0	0	0
1839409	1524022	USA	male	neutered	2011-10-28	Golden Retriever	36.4238	7	29.4838	891	Dry	Satiety Weight Management Dry	2015-03-31	2	2015-04-21	0	0	-2	-1.90511	3	-1.6568	891	0	70.419	0	-1.90511	-4.97041	3	-1.6568
1839409	1524022	USA	male	neutered	2011-10-28	Golden Retriever	35.1084	7	29.4838	891	Dry	Satiety Weight Management Dry	2015-03-31	3	2015-05-12	0	0	-1	-3.22054	6	-1.40039	891	0	70.419	0	-1.31543	-3.43195	3	-1.14398
1839409	1524022	USA	male	neutered	2011-10-28	Golden Retriever	34.0198	7	29.4838	891	Dry	Satiety Weight Management Dry	2015-03-31	4	2015-06-02	0	0	-1	-4.30917	9	-1.24918	891	0	70.419	0	-1.08863	-2.84024	3	-0.946746
1839409	1524022	USA	male	neutered	2011-10-28	Golden Retriever	34.0651	7	29.4838	808	Dry	Satiety Weight Management Dry	2015-03-31	5	2015-06-23	0	0	-1	-4.26381	12	-0.927022	891	0	70.419	0	0.0453597	0.118343	3	0.0394477
1839593	1507104	USA	female	neutered	2005-03-27	Medium	26.7622	7	22.3034	723	Dry	Satiety Weight Management Dry	2015-04-01	1	2015-04-01	1	1	0	0	0	#N/A	655.333	-135	63.853	-13.154	0	0	0
1839593	1507104	USA	female	neutered	2005-03-27	Medium	26.3177	7	22.3034	723	Dry	Satiety Weight Management Dry	2015-04-01	2	2015-04-09	1	0	0	-0.444525	1.14286	-1.45339	655.333	-135	63.853	-13.154	-0.444525	-1.66102	1.14286	-1.45339
1839593	1507104	USA	female	neutered	2005-03-27	Medium	26.0365	7	22.3034	655	Dry	Satiety Weight Management Dry	2015-04-01	3	2015-05-01	1	1	-1	-0.725755	4.28571	-0.632768	655.333	-135	63.853	-13.154	-0.28123	-1.05085	3.14286	-0.334361
1839593	1507104	USA	female	neutered	2005-03-27	Medium	26.7622	7	22.3034	588	Dry	Satiety Weight Management Dry	2015-04-01	4	2015-06-01	1	1	-1	0	8.71429	0	655.333	-135	63.853	-13.154	0.725755	2.71186	4.42857	0.612356
1839593	1507104	USA	female	neutered	2005-03-27	Medium	26.1272	7	22.3034	531	Dry	Satiety Weight Management Dry	2015-04-01	5	2015-07-01	1	0	-1	-0.635036	13	-0.182529	655.333	-135	63.853	-13.154	-0.635036	-2.37288	4.28571	-0.553672
1839598	767632	Netherlands	female	neutered	2010-03-31	Labrador Retriever	31.6	8	26.33	704	Dry	Satiety Weight Management Dry	2015-03-31	1	2015-03-31	0	1	-1	0	0	#N/A	650.667	-64	55.978	-5.506	0	0	0
1839598	767632	Netherlands	female	neutered	2010-03-31	Labrador Retriever	31.5	8	26.33	640	Dry	Satiety Weight Management Dry	2015-03-31	2	2015-04-14	0	0	-1	-0.1	2	-0.158228	650.667	-64	55.978	-5.506	-0.1	-0.316456	2	-0.158228
1839598	767632	Netherlands	female	neutered	2010-03-31	Labrador Retriever	29.7	8	26.33	640	Dry	Satiety Weight Management Dry	2015-03-31	3	2015-05-07	1	1	-1	-1.9	5.28571	-1.13753	650.667	-64	55.978	-5.506	-1.8	-5.6962	3.28571	-1.73363
1839598	767632	Netherlands	female	neutered	2010-03-31	Labrador Retriever	28.9	8	26.33	640	Dry	Satiety Weight Management Dry	2015-03-31	4	2015-05-28	1	0	-1	-2.7	8.28571	-1.03121	650.667	-64	55.978	-5.506	-0.8	-2.53165	3	-0.843882
1839598	767632	Netherlands	female	neutered	2010-03-31	Labrador Retriever	28.2	8	26.33	576	Dry	Satiety Weight Management Dry	2015-03-31	5	2015-06-18	1	1	-1	-3.4	11.2857	-0.953373	650.667	-64	55.978	-5.506	-0.7	-2.21519	3	-0.738397
1839655	1305717	Italy	female	intact	2007-03-31	Chihuahua	9.3	8	7.15	308	Mix feeding	wet product : Satiety Weight Management Canine / dry product : Satiety Weight Management Dry	2015-03-31	1	2015-03-31	-1	1	0	0	0	#N/A	283.833	-29	64.913	-6.632	0	0	0
1839655	1305717	Italy	female	intact	2007-03-31	Chihuahua	9.2	8	7.15	279	Mix feeding	wet product : Satiety Weight Management Canine / dry product : Satiety Weight Management Dry	2015-03-31	2	2015-04-14	0	0	0	-0.1	2	-0.537634	283.833	-29	64.913	-6.632	-0.1	-1.07527	2	-0.537634
1839655	1305717	Italy	female	intact	2007-03-31	Chihuahua	8.2	8	7.15	279	Mix feeding	wet product : Satiety Weight Management Canine / dry product : Satiety Small Dog	2015-03-31	3	2015-05-02	0	1	0	-1.1	4.57143	-2.58737	283.833	-29	64.913	-6.632	-1	-10.7527	2.57143	-4.1816
1839655	1305717	Italy	female	intact	2007-03-31	Chihuahua	7.9	8	7.15	279	Mix feeding	wet product : Satiety Weight Management Canine / dry product : Satiety Weight Management Dry	2015-03-31	4	2015-06-04	1	1	0	-1.4	9.28571	-1.62117	283.833	-29	64.913	-6.632	-0.3	-3.22581	4.71429	-0.684262
1839655	1305717	Italy	female	intact	2007-03-31	Chihuahua	7.2	8	7.15	279	Mix feeding	wet product : Satiety Weight Management Canine / dry product : Satiety Small Dog	2015-03-31	5	2015-07-03	0	0	0	-2.1	13.4286	-1.68154	283.833	-29	64.913	-6.632	-0.7	-7.52688	4.14286	-1.81683
1839674	1262433	Italy	male	intact	2010-03-31	Labrador Retriever	40	7	33.33	1114	Dry	Satiety Weight Management Dry	2015-03-31	1	2015-03-31	0	1	-2	0	0	#N/A	1078.67	-106	77.761	-7.642	0	0	0
1839674	1262433	Italy	male	intact	2010-03-31	Labrador Retriever	38.1	7	33.33	1114	Dry	Satiety Weight Management Dry	2015-03-31	2	2015-04-18	0	0	-2	-1.9	2.57143	-1.84722	1078.67	-106	77.761	-7.642	-1.9	-4.75	2.57143	-1.84722
1839674	1262433	Italy	male	intact	2010-03-31	Labrador Retriever	36.2	7	33.33	1114	Dry	Satiety Weight Management Dry	2015-03-31	3	2015-04-30	0	0	-1	-3.8	4.28571	-2.21667	1078.67	-106	77.761	-7.642	-1.9	-4.75	1.71429	-2.77083
1839674	1262433	Italy	male	intact	2010-03-31	Labrador Retriever	34.9	7	33.33	1008	Dry	Satiety Weight Management Dry	2015-03-31	4	2015-06-02	0	0	-1	-5.1	9	-1.41667	1078.67	-106	77.761	-7.642	-1.3	-3.25	4.71429	-0.689394
1839674	1262433	Italy	male	intact	2010-03-31	Labrador Retriever	33.8	7	33.33	901	Dry	Satiety Weight Management Dry	2015-03-31	5	2015-07-03	0	0	0	-6.2	13.4286	-1.15426	1078.67	-106	77.761	-7.642	-1.1	-2.75	4.42857	-0.620968
1839784	1523340	Canada	female	neutered	2002-09-26	Maltese	14.8	7	10.57	355	Dry	Satiety Small Dog	2015-04-01	1	2015-04-01	-1	0	-2	0	0	#N/A	355	0	60.558	0	0	0	0
1839784	1523340	Canada	female	neutered	2002-09-26	Maltese	14.2	7	10.57	355	Dry	Satiety Small Dog	2015-04-01	2	2015-04-15	0	0	-1	-0.6	2	-2.02703	355	0	60.558	0	-0.6	-4.05405	2	-2.02703
1839784	1523340	Canada	female	neutered	2002-09-26	Maltese	13.8	7	10.57	355	Dry	Satiety Small Dog	2015-04-01	3	2015-04-29	1	1	-1	-1	4	-1.68919	355	0	60.558	0	-0.4	-2.7027	2	-1.35135
1839784	1523340	Canada	female	neutered	2002-09-26	Maltese	13.4	7	10.57	355	Dry	Satiety Small Dog	2015-04-01	4	2015-05-28	1	1	-1	-1.4	8.14286	-1.16169	355	0	60.558	0	-0.4	-2.7027	4.14286	-0.652377
1839784	1523340	Canada	female	neutered	2002-09-26	Maltese	13	7	10.57	323	Dry	Satiety Small Dog	2015-04-01	5	2015-06-30	1	1	-1	-1.8	12.8571	-0.945946	355	0	60.558	0	-0.4	-2.7027	4.71429	-0.573301
1839835	767624	Netherlands	female	neutered	2011-01-22	Lhasa Apso	10.5	7	8.75	308	Mix feeding	wet product : Satiety Weight Management Canine / dry product : Satiety Small Dog	2015-04-01	1	2015-04-01	-1	1	-2	0	0	#N/A	286	-33	56.216	-6.486	0	0	0
1839835	767624	Netherlands	female	neutered	2011-01-22	Lhasa Apso	10.1	7	8.75	308	Mix feeding	wet product : Satiety Weight Management Canine / dry product : Satiety Small Dog	2015-04-01	2	2015-04-20	0	1	-2	-0.4	2.71429	-1.40351	286	-33	56.216	-6.486	-0.4	-3.80952	2.71429	-1.40351
1839835	767624	Netherlands	female	neutered	2011-01-22	Lhasa Apso	10	7	8.75	275	Mix feeding	wet product : Satiety Weight Management Canine / dry product : Satiety Weight Management Dry	2015-04-01	3	2015-05-06	-1	1	-2	-0.5	5	-0.952381	286	-33	56.216	-6.486	-0.1	-0.952381	2.28571	-0.416667
1839835	767624	Netherlands	female	neutered	2011-01-22	Lhasa Apso	9.55	7	8.75	275	Mix feeding	wet product : Satiety Weight Management Canine / dry product : Satiety Small Dog	2015-04-01	4	2015-05-28	0	1	-1	-0.95	8.14286	-1.11111	286	-33	56.216	-6.486	-0.45	-4.28571	3.14286	-1.36364
1839835	767624	Netherlands	female	neutered	2011-01-22	Lhasa Apso	9.3	7	8.75	275	Mix feeding	wet product : Satiety Weight Management Canine / dry product : Satiety Small Dog	2015-04-01	5	2015-06-10	0	1	-1	-1.2	10	-1.14286	286	-33	56.216	-6.486	-0.25	-2.38095	1.85714	-1.28205
1839966	1499565	Hungary	female	intact	2008-03-13	MINI	10	9	7.69	326	Dry	Satiety Small Dog	2015-04-01	1	2015-04-01	-1	0	-2	0	0	#N/A	271.5	-87	58.793	-18.84	0	0	0
1839966	1499565	Hungary	female	intact	2008-03-13	MINI	9.8	9	7.69	295	Dry	Satiety Small Dog	2015-04-01	2	2015-04-15	-1	-1	-2	-0.2	2	-1	271.5	-87	58.793	-18.84	-0.2	-2	2	-1
1839966	1499565	Hungary	female	intact	2008-03-13	MINI	9.7	9	7.69	265	Dry	Satiety Small Dog	2015-04-01	3	2015-04-29	0	0	-3	-0.3	4	-0.75	271.5	-87	58.793	-18.84	-0.1	-1	2	-0.5
1839966	1499565	Hungary	female	intact	2008-03-13	MINI	10.1	9	7.69	239	Dry	Satiety Small Dog	2015-04-01	4	2015-05-29	0	0	-3	0.1	8.28571	0.12069	271.5	-87	58.793	-18.84	0.4	4	4.28571	0.933333
1839966	1499565	Hungary	female	intact	2008-03-13	MINI	9.4	9	7.69	214	Dry	Satiety Small Dog	2015-04-01	5	2015-07-03	0	0	-3	-0.6	13.2857	-0.451613	271.5	-87	58.793	-18.84	-0.7	-7	5	-1.4
1839977	1522584	Spain	male	neutered	2013-03-01	others	17.15	9	14.29	518	Mix feeding	wet product : Satiety Weight Management HÃºmedo / dry product : Satiety Weight Management Dry	2015-04-01	1	2015-04-01	0	1	-2	0	0	#N/A	501.667	-49	68.256	-6.667	0	0	0
1839977	1522584	Spain	male	neutered	2013-03-01	others	16.25	9	14.29	518	Mix feeding	wet product : Satiety Weight Management HÃºmedo / dry product : Satiety Weight Management Dry	2015-04-01	2	2015-04-17	1	1	-3	-0.9	2.28571	-2.29592	501.667	-49	68.256	-6.667	-0.9	-5.24781	2.28571	-2.29592
1839977	1522584	Spain	male	neutered	2013-03-01	others	15.7	9	14.29	518	Mix feeding	wet product : Satiety Weight Management HÃºmedo / dry product : Satiety Weight Management Dry	2015-04-01	3	2015-05-04	0	0	-1	-1.45	4.71429	-1.79344	501.667	-49	68.256	-6.667	-0.55	-3.207	2.42857	-1.32053
1839977	1522584	Spain	male	neutered	2013-03-01	others	15.7	9	14.29	469	Mix feeding	wet product : Satiety Weight Management HÃºmedo / dry product : Satiety Weight Management Dry	2015-04-01	4	2015-06-02	1	1	-1	-1.45	8.85714	-0.954575	501.667	-49	68.256	-6.667	0	0	4.14286	0
1839977	1522584	Spain	male	neutered	2013-03-01	others	14.7	9	14.29	469	Mix feeding	wet product : Satiety Weight Management HÃºmedo / dry product : Satiety Weight Management Dry	2015-04-01	5	2015-07-07	1	0	-1	-2.45	13.8571	-1.03093	501.667	-49	68.256	-6.667	-1	-5.8309	5	-1.16618
1840382	1524020	Germany	male	neutered	2010-12-24	Beagle	23.55	8	19.63	657	Dry	Satiety Weight Management Dry	2015-04-07	1	2015-04-07	-1	1	-1	0	0	#N/A	657	0	70.449	0	0	0	0
1840382	1524020	Germany	male	neutered	2010-12-24	Beagle	22.6	8	19.63	657	Dry	Satiety Weight Management Dry	2015-04-07	2	2015-04-21	-1	1	-1	-0.95	2	-2.01699	657	0	70.449	0	-0.95	-4.03397	2	-2.01699
1840382	1524020	Germany	male	neutered	2010-12-24	Beagle	22.15	8	19.63	657	Dry	Satiety Weight Management Dry	2015-04-07	3	2015-05-04	-1	1	-2	-1.4	3.85714	-1.54124	657	0	70.449	0	-0.45	-1.91083	1.85714	-1.02891
1840382	1524020	Germany	male	neutered	2010-12-24	Beagle	21.08	8	19.63	657	Dry	Satiety Weight Management Dry	2015-04-07	4	2015-06-03	0	1	-2	-2.47	8.14286	-1.28804	657	0	70.449	0	-1.07	-4.54352	4.28571	-1.06016
1840382	1524020	Germany	male	neutered	2010-12-24	Beagle	19.45	8	19.63	657	Dry	Satiety Weight Management Dry	2015-04-07	5	2015-07-03	0	1	-2	-4.1	12.4286	-1.40079	657	0	70.449	0	-1.63	-6.92144	4.28571	-1.615
1840473	1502313	USA	female	neutered	2009-04-01	Giant	41.9577	7	32.2734	820	Dry	Satiety Weight Management Dry	2015-04-01	1	2015-04-01	0	0	0	0	0	#N/A	688.167	-209	50.823	-15.435	0	0	0
1840473	1502313	USA	female	neutered	2009-04-01	Giant	41.3227	7	32.2734	745	Dry	Satiety Weight Management Dry	2015-04-01	2	2015-04-15	0	0	0	-0.635036	2	-0.756757	688.167	-209	50.823	-15.435	-0.635036	-1.51351	2	-0.756757
1840473	1502313	USA	female	neutered	2009-04-01	Giant	40.4155	7	32.2734	671	Dry	Satiety Weight Management Dry	2015-04-01	3	2015-04-29	0	0	-2	-1.54223	4	-0.918919	688.167	-209	50.823	-15.435	-0.907194	-2.16216	2	-1.08108
1840473	1502313	USA	female	neutered	2009-04-01	Giant	39.7351	7	32.2734	611	Dry	Satiety Weight Management Dry	2015-04-01	4	2015-05-27	0	1	-1	-2.22263	8	-0.662162	688.167	-209	50.823	-15.435	-0.680396	-1.62162	4	-0.405405
1840473	1502313	USA	female	neutered	2009-04-01	Giant	36.9228	7	32.2734	611	Dry	Satiety Weight Management Dry	2015-04-01	5	2015-06-23	0	0	-1	-5.03493	11.8571	-1.01205	688.167	-209	50.823	-15.435	-2.8123	-6.7027	3.85714	-1.73774
1840494	1516940	USA	male	neutered	2012-04-14	Golden Retriever	47.1287	7	36.2515	1041	Dry	Satiety Weight Management Dry	2015-04-01	1	2015-04-01	-1	1	-1	0	0	#N/A	867.333	-277	58.707	-18.749	0	0	0
1840494	1516940	USA	male	neutered	2012-04-14	Golden Retriever	47.1741	7	36.2515	943	Dry	Satiety Weight Management Dry	2015-04-01	2	2015-04-15	1	1	0	0.0453597	2	0.0481232	867.333	-277	58.707	-18.749	0.0453597	0.0962464	2	0.0481232
1840494	1516940	USA	male	neutered	2012-04-14	Golden Retriever	45.7679	7	36.2515	846	Dry	Satiety Weight Management Dry	2015-04-01	3	2015-04-29	1	1	0	-1.36079	4	-0.721848	867.333	-277	58.707	-18.749	-1.40615	-2.98364	2	-1.49182
1840494	1516940	USA	male	neutered	2012-04-14	Golden Retriever	45.1329	7	36.2515	764	Dry	Satiety Weight Management Dry	2015-04-01	4	2015-05-28	1	1	0	-1.99583	8.14286	-0.520068	867.333	-277	58.707	-18.749	-0.635036	-1.34745	4.14286	-0.325246
1840494	1516940	USA	male	neutered	2012-04-14	Golden Retriever	43.5453	7	36.2515	683	Dry	Satiety Weight Management Dry	2015-04-01	5	2015-07-08	1	1	0	-3.58342	14	-0.543105	867.333	-277	58.707	-18.749	-1.58759	-3.36862	5.85714	-0.575131
1840545	1493697	Argentina	female	neutered	2004-04-02	Pastor Belga	37	8	28.46	746	Dry	Satiety Weight Management Dry	2015-04-02	1	2015-04-02	-1	0	0	0	0	#N/A	746	0	60.543	0	0	0	0
1840545	1493697	Argentina	female	neutered	2004-04-02	Pastor Belga	34.9	8	28.46	746	Dry	Satiety Weight Management Dry	2015-04-02	2	2015-04-27	0	0	0	-2.1	3.57143	-1.58919	746	0	60.543	0	-2.1	-5.67568	3.57143	-1.58919
1840545	1493697	Argentina	female	neutered	2004-04-02	Pastor Belga	34.5	8	28.46	746	Dry	Satiety Weight Management Dry	2015-04-02	3	2015-05-12	0	0	0	-2.5	5.71429	-1.18243	746	0	60.543	0	-0.4	-1.08108	2.14286	-0.504505
1840545	1493697	Argentina	female	neutered	2004-04-02	Pastor Belga	33.3	8	28.46	746	Dry	Satiety Weight Management Dry	2015-04-02	4	2015-06-01	0	0	0	-3.7	8.57143	-1.16667	746	0	60.543	0	-1.2	-3.24324	2.85714	-1.13514
1840545	1493697	Argentina	female	neutered	2004-04-02	Pastor Belga	33.1	8	28.46	678	Dry	Satiety Weight Management Dry	2015-04-02	5	2015-07-02	0	0	0	-3.9	13	-0.810811	746	0	60.543	0	-0.2	-0.540541	4.42857	-0.122058
1840727	1525361	Germany	male	intact	2010-04-02	Beagle	20.2	8	16.83	668	Mix feeding	wet product : <font><font>Satiety Weight Management Canine</font></font> / dry product : Satiety Weight Management Dry	2015-04-02	1	2015-04-02	0	0	-2	0	0	#N/A	578	-119	69.561	-14.321	0	0	0
1840727	1525361	Germany	male	intact	2010-04-02	Beagle	20	8	16.83	604	Wet	Satiety Weight Management Canine	2015-04-02	2	2015-04-20	0	0	-3	-0.2	2.57143	-0.385039	578	-119	69.561	-14.321	-0.2	-0.990099	2.57143	-0.385039
1840727	1525361	Germany	male	intact	2010-04-02	Beagle	19.3	8	16.83	549	Mix feeding	wet product : <font><font>Sattheit Weight Management Canine</font></font> / dry product : Satiety Weight Management Dry	2015-04-02	3	2015-05-09	0	0	-1	-0.9	5.28571	-0.842922	578	-119	69.561	-14.321	-0.7	-3.46535	2.71429	-1.27671
1840727	1525361	Germany	male	intact	2010-04-02	Beagle	19	8	16.83	549	Mix feeding	wet product : <font><font>Sattheit Weight Management Canine</font></font> / dry product : Satiety Weight Management Dry	2015-04-02	4	2015-06-09	1	1	-1	-1.2	9.71429	-0.611532	578	-119	69.561	-14.321	-0.3	-1.48515	4.42857	-0.335356
1840727	1525361	Germany	male	intact	2010-04-02	Beagle	18.6	8	16.83	494	Mix feeding	wet product : <font><font>Sattheit Weight Management Canine</font></font> / dry product : Satiety Weight Management Dry	2015-04-02	5	2015-06-24	0	1	-1	-1.6	11.8571	-0.668019	578	-119	69.561	-14.321	-0.4	-1.9802	2.14286	-0.924092
1840988	1257024	Italy	female	intact	2013-04-02	Maxi	36	8	29	880	Dry	Satiety Weight Management Dry	2015-04-02	1	2015-04-02	0	0	-2	0	0	#N/A	917.167	-13	73.392	-1.04	0	0	0
1840988	1257024	Italy	female	intact	2013-04-02	Maxi	33.5	8	29	963	Dry	Satiety Weight Management Dry	2015-04-02	2	2015-04-17	1	-1	-2	-2.5	2.14286	-3.24074	917.167	-13	73.392	-1.04	-2.5	-6.94444	2.14286	-3.24074
1840988	1257024	Italy	female	intact	2013-04-02	Maxi	34	8	29	963	Dry	Satiety Weight Management Dry	2015-04-02	3	2015-05-04	1	0	-1	-2	4.57143	-1.21528	917.167	-13	73.392	-1.04	0.5	1.38889	2.42857	0.571895
1840988	1257024	Italy	female	intact	2013-04-02	Maxi	33	8	29	867	Dry	Satiety Weight Management Dry	2015-04-02	4	2015-06-05	1	0	0	-3	9.14286	-0.911458	917.167	-13	73.392	-1.04	-1	-2.77778	4.57143	-0.607639
1840988	1257024	Italy	female	intact	2013-04-02	Maxi	33	8	29	784	Dry	Satiety Weight Management Dry	2015-04-02	5	2015-06-22	1	1	0	-3	11.5714	-0.720165	917.167	-13	73.392	-1.04	0	0	2.42857	0
1841037	767632	Netherlands	male	intact	2006-04-02	Mopshond	11.4	7	8.77	410	Dry	Satiety Small Dog	2015-04-02	1	2015-04-02	0	1	0	0	0	#N/A	370.333	-79	72.668	-15.502	0	0	0
1841037	767632	Netherlands	male	intact	2006-04-02	Mopshond	10.9	7	8.77	410	Dry	Satiety Small Dog	2015-04-02	2	2015-04-17	0	1	0	-0.5	2.14286	-2.04678	370.333	-79	72.668	-15.502	-0.5	-4.38596	2.14286	-2.04678
1841037	767632	Netherlands	male	intact	2006-04-02	Mopshond	10.9	7	8.77	370	Dry	Satiety Small Dog	2015-04-02	3	2015-05-09	0	0	0	-0.5	5.28571	-0.829777	370.333	-79	72.668	-15.502	0	0	3.14286	0
1841037	767632	Netherlands	male	intact	2006-04-02	Mopshond	10.5	7	8.77	331	Dry	Satiety Small Dog	2015-04-02	4	2015-05-29	1	1	0	-0.9	8.14286	-0.969529	370.333	-79	72.668	-15.502	-0.4	-3.50877	2.85714	-1.22807
1841037	767632	Netherlands	male	intact	2006-04-02	Mopshond	10.4	7	8.77	298	Dry	Satiety Small Dog	2015-04-02	5	2015-06-19	0	0	0	-1	11.1429	-0.787224	370.333	-79	72.668	-15.502	-0.1	-0.877193	3	-0.292398
1841049	1516940	USA	male	neutered	2010-01-06	Beagle	23.7231	7	18.2482	622	Dry	Satiety Weight Management Dry	2015-04-16	1	2015-04-16	0	1	-1	0	0	#N/A	602.667	-58	68.259	-6.569	0	0	0
1841049	1516940	USA	male	neutered	2010-01-06	Beagle	22.8159	7	18.2482	622	Dry	Satiety Weight Management Dry	2015-04-16	2	2015-04-30	0	1	-1	-0.907194	2	-1.91205	602.667	-58	68.259	-6.569	-0.907194	-3.82409	2	-1.91205
1841049	1516940	USA	male	neutered	2010-01-06	Beagle	22.1809	7	18.2482	622	Dry	Satiety Weight Management Dry	2015-04-16	3	2015-05-18	0	0	-1	-1.54223	4.57143	-1.42208	602.667	-58	68.259	-6.569	-0.635036	-2.67686	2.57143	-1.041
1841049	1516940	USA	male	neutered	2010-01-06	Beagle	22.317	7	18.2482	564	Dry	Satiety Weight Management Dry	2015-04-16	4	2015-06-18	0	0	-1	-1.40615	9	-0.658594	602.667	-58	68.259	-6.569	0.136079	0.573614	4.42857	0.129526
1841049	1516940	USA	male	neutered	2010-01-06	Beagle	22.4531	7	18.2482	506	Dry	Satiety Weight Management Dry	2015-04-16	5	2015-07-03	0	0	-1	-1.27007	11.1429	-0.480463	602.667	-58	68.259	-6.569	0.136079	0.573614	2.14286	0.267686
1841055	1516940	USA	male	neutered	2008-05-27	Beagle	29.4838	9	21.0605	693	Dry	Satiety Weight Management Dry	2015-04-02	1	2015-04-02	-1	0	-1	0	0	#N/A	617.167	-130	62.777	-13.223	0	0	0
1841055	1516940	USA	male	neutered	2008-05-27	Beagle	29.257	9	21.0605	628	Dry	Satiety Weight Management Dry	2015-04-02	2	2015-04-15	-1	0	-1	-0.226799	1.85714	-0.414201	617.167	-130	62.777	-13.223	-0.226799	-0.769231	1.85714	-0.414201
1841055	1516940	USA	male	neutered	2008-05-27	Beagle	28.123	9	21.0605	628	Dry	Satiety Weight Management Dry	2015-04-02	3	2015-04-29	-1	0	-1	-1.36079	3.85714	-1.19658	617.167	-130	62.777	-13.223	-1.13399	-3.84615	2	-1.92308
1841055	1516940	USA	male	neutered	2008-05-27	Beagle	27.1251	9	21.0605	563	Dry	Satiety Weight Management Dry	2015-04-02	4	2015-05-29	0	0	-1	-2.3587	8.14286	-0.982456	617.167	-130	62.777	-13.223	-0.997913	-3.38462	4.28571	-0.789744
1841055	1516940	USA	male	neutered	2008-05-27	Beagle	25.1293	9	21.0605	563	Dry	Satiety Weight Management Dry	2015-04-02	5	2015-07-02	1	0	-1	-4.35453	13	-1.13609	617.167	-130	62.777	-13.223	-1.99583	-6.76923	4.85714	-1.39367
1841080	1256948	Italy	male	neutered	2004-04-02	MINI	6.3	7	5.25	245	Dry	Satiety Small Dog	2015-04-02	1	2015-04-02	-1	0	-3	0	0	#N/A	245	0	70.639	0	0	0	0
1841080	1256948	Italy	male	neutered	2004-04-02	MINI	6.1	7	5.25	245	Dry	Satiety Small Dog	2015-04-02	2	2015-04-21	-1	0	0	-0.2	2.71429	-1.16959	245	0	70.639	0	-0.2	-3.1746	2.71429	-1.16959
1841080	1256948	Italy	male	neutered	2004-04-02	MINI	5.8	7	5.25	245	Dry	Satiety Small Dog	2015-04-02	3	2015-05-09	0	0	0	-0.5	5.28571	-1.5015	245	0	70.639	0	-0.3	-4.7619	2.57143	-1.85185
1841080	1256948	Italy	male	neutered	2004-04-02	MINI	5.6	7	5.25	245	Dry	Satiety Small Dog	2015-04-02	4	2015-06-06	0	0	0	-0.7	9.28571	-1.19658	245	0	70.639	0	-0.2	-3.1746	4	-0.793651
1841080	1256948	Italy	male	neutered	2004-04-02	MINI	5.2	7	5.25	245	Dry	Satiety Small Dog	2015-04-02	5	2015-07-07	0	0	0	-1.1	13.7143	-1.27315	245	0	70.639	0	-0.4	-6.34921	4.42857	-1.43369
1841171	1492891	USA	male	neutered	2010-02-28	Dachshund	11.0224	7	7.87444	331	Dry	Satiety Weight Management Dry	2015-04-02	1	2015-04-02	0	1	-2	0	0	#N/A	276.167	-87	58.75	-18.508	0	0	0
1841171	1492891	USA	male	neutered	2010-02-28	Dachshund	11.0224	7	7.87444	300	Dry	Satiety Weight Management Dry	2015-04-02	2	2015-04-17	0	1	-2	0	2.14286	0	276.167	-87	58.75	-18.508	0	0	2.14286	0
1841171	1492891	USA	male	neutered	2010-02-28	Dachshund	11.0678	7	7.87444	269	Dry	Satiety Weight Management Dry	2015-04-02	3	2015-05-01	1	1	-2	0.0453597	4.14286	0.0993331	276.167	-87	58.75	-18.508	0.0453597	0.411523	2	0.205761
1841171	1492891	USA	male	neutered	2010-02-28	Dachshund	10.841	7	7.87444	244	Dry	Satiety Small Dog	2015-04-02	4	2015-05-29	1	1	-1	-0.181439	8.14286	-0.202151	276.167	-87	58.75	-18.508	-0.226799	-2.05761	4	-0.514403
1841171	1492891	USA	male	neutered	2010-02-28	Dachshund	11.0224	7	7.87444	223	Dry	Satiety Weight Management Dry	2015-04-02	5	2015-07-02	0	0	-1	0	13	0	276.167	-87	58.75	-18.508	0.181439	1.64609	4.85714	0.338901
1841264	1511535	Hungary	male	neutered	2007-01-01	Maxi	30.4	7	25.33	795	Dry	Satiety Weight Management Dry	2015-04-02	1	2015-04-02	0	0	-2	0	0	#N/A	720.667	-149	63.828	-13.197	0	0	0
1841264	1511535	Hungary	male	neutered	2007-01-01	Maxi	31.2	7	25.33	795	Dry	Satiety Weight Management Dry	2015-04-02	2	2015-04-16	0	0	-2	0.8	2	1.31579	720.667	-149	63.828	-13.197	0.8	2.63158	2	1.31579
1841264	1511535	Hungary	male	neutered	2007-01-01	Maxi	30.6	7	25.33	721	Dry	Satiety Weight Management Dry	2015-04-02	3	2015-04-30	0	0	-1	0.2	4	0.164474	720.667	-149	63.828	-13.197	-0.6	-1.97368	2	-0.986842
1841264	1511535	Hungary	male	neutered	2007-01-01	Maxi	30	7	25.33	646	Dry	Satiety Weight Management Dry	2015-04-02	4	2015-06-01	0	0	-1	-0.4	8.57143	-0.153509	720.667	-149	63.828	-13.197	-0.6	-1.97368	4.57143	-0.431743
1841264	1511535	Hungary	male	neutered	2007-01-01	Maxi	28.6	7	25.33	584	Dry	Satiety Weight Management Dry	2015-04-02	5	2015-07-01	0	0	-1	-1.8	12.8571	-0.460526	720.667	-149	63.828	-13.197	-1.4	-4.60526	4.28571	-1.07456
1841294	1510442	Portugal	female	neutered	2014-03-27	Australian Cattle Dog	23	7	19.17	555	Dry	0.5	2015-04-02	1	2015-04-02	1	1	-1	0	0	#N/A	555	0	60.58	0	0	0	0
1841294	1510442	Portugal	female	neutered	2014-03-27	Australian Cattle Dog	21.95	7	19.17	555	Dry	Satiety Weight Management Dry	2015-04-02	2	2015-04-16	1	1	0	-1.05	2	-2.28261	555	0	60.58	0	-1.05	-4.56522	2	-2.28261
1841294	1510442	Portugal	female	neutered	2014-03-27	Australian Cattle Dog	21.4	7	19.17	555	Dry	Satiety Weight Management Dry	2015-04-02	3	2015-04-30	0	0	0	-1.6	4	-1.73913	555	0	60.58	0	-0.55	-2.3913	2	-1.19565
1841294	1510442	Portugal	female	neutered	2014-03-27	Australian Cattle Dog	20.55	7	19.17	555	Dry	Satiety Small Dog	2015-04-02	4	2015-05-29	1	0	0	-2.45	8.14286	-1.30816	555	0	60.58	0	-0.85	-3.69565	4.14286	-0.892054
1841294	1510442	Portugal	female	neutered	2014-03-27	Australian Cattle Dog	19.6	7	19.17	555	Dry	Satiety Small Dog	2015-04-02	5	2015-06-29	1	1	0	-3.4	12.5714	-1.17589	555	0	60.58	0	-0.95	-4.13043	4.42857	-0.932679
1841332	1502311	USA	female	neutered	2008-04-02	Shetland Sheepdog	13.6986	8	9.78409	335	Dry	Satiety Small Dog	2015-04-02	1	2015-04-02	0	0	0	0	0	#N/A	335	0	60.556	0	0	0	0
1841332	1502311	USA	female	neutered	2008-04-02	Shetland Sheepdog	13.0636	8	9.78409	335	Dry	Satiety Small Dog	2015-04-02	2	2015-04-16	-1	0	0	-0.635036	2	-2.31788	335	0	60.556	0	-0.635036	-4.63576	2	-2.31788
1841332	1502311	USA	female	neutered	2008-04-02	Shetland Sheepdog	12.8368	8	9.78409	335	Dry	Satiety Small Dog	2015-04-02	3	2015-04-30	0	1	0	-0.861834	4	-1.57285	335	0	60.556	0	-0.226799	-1.65563	2	-0.827815
1841332	1502311	USA	female	neutered	2008-04-02	Shetland Sheepdog	12.1564	8	9.78409	335	Dry	Satiety Small Dog	2015-04-02	4	2015-05-28	1	1	0	-1.54223	8	-1.40728	335	0	60.556	0	-0.680396	-4.96689	4	-1.24172
1841332	1502311	USA	female	neutered	2008-04-02	Shetland Sheepdog	11.9296	8	9.78409	335	Dry	Satiety Small Dog	2015-04-02	5	2015-06-25	1	1	0	-1.76903	12	-1.07616	335	0	60.556	0	-0.226799	-1.65563	4	-0.413907
1841338	1516940	USA	male	neutered	2007-04-20	Labrador Retriever	49.6235	8	38.1702	1082	Dry	Satiety Weight Management Dry	2015-04-06	1	2015-04-06	0	0	-1	0	0	#N/A	1048	-102	68.245	-6.642	0	0	0
1841338	1516940	USA	male	neutered	2007-04-20	Labrador Retriever	48.0813	8	38.1702	1082	Dry	Satiety Weight Management Dry	2015-04-06	2	2015-04-20	0	0	-1	-1.54223	2	-1.55393	1048	-102	68.245	-6.642	-1.54223	-3.10786	2	-1.55393
1841338	1516940	USA	male	neutered	2007-04-20	Labrador Retriever	46.9473	8	38.1702	1082	Dry	Satiety Weight Management Dry	2015-04-06	3	2015-05-07	1	0	-1	-2.67622	4.42857	-1.21779	1048	-102	68.245	-6.642	-1.13399	-2.28519	2.42857	-0.940961
1841338	1516940	USA	male	neutered	2007-04-20	Labrador Retriever	45.4051	8	38.1702	980	Dry	Satiety Weight Management Dry	2015-04-06	4	2015-06-11	1	0	-1	-4.21845	9.42857	-0.901612	1048	-102	68.245	-6.642	-1.54223	-3.10786	5	-0.621572
1841338	1516940	USA	male	neutered	2007-04-20	Labrador Retriever	43.7268	8	38.1702	879	Dry	Satiety Weight Management Dry	2015-04-06	5	2015-07-08	1	0	-1	-5.89676	13.2857	-0.894419	1048	-102	68.245	-6.642	-1.67831	-3.38208	3.85714	-0.876837
1841449	1502194	Italy	female	neutered	2012-02-23	Rottweiler	50.4	9	36	890	Mix feeding	wet product : Satiety Weight Management Canine / dry product : Satiety Weight Management Dry	2015-04-03	1	2015-04-03	0	1	-3	0	0	#N/A	890	0	60.557	0	0	0	0
1841449	1502194	Italy	female	neutered	2012-02-23	Rottweiler	48.6	9	36	890	Mix feeding	wet product : Satiety Weight Management Canine / dry product : Satiety Weight Management Dry	2015-04-03	2	2015-04-20	0	0	-1	-1.8	2.42857	-1.47059	890	0	60.557	0	-1.8	-3.57143	2.42857	-1.47059
1841449	1502194	Italy	female	neutered	2012-02-23	Rottweiler	47.8	9	36	890	Mix feeding	wet product : Satiety Weight Management Canine / dry product : Satiety Weight Management Dry	2015-04-03	3	2015-05-04	1	1	-2	-2.6	4.42857	-1.16487	890	0	60.557	0	-0.8	-1.5873	2	-0.793651
1841449	1502194	Italy	female	neutered	2012-02-23	Rottweiler	46.1	9	36	890	Dry	Satiety Weight Management Dry	2015-04-03	4	2015-05-22	1	0	0	-4.3	7	-1.21882	890	0	60.557	0	-1.7	-3.37302	2.57143	-1.31173
1841449	1502194	Italy	female	neutered	2012-02-23	Rottweiler	44.4	9	36	890	Dry	Satiety Weight Management Dry	2015-04-03	5	2015-06-24	1	1	0	-6	11.7143	-1.01626	890	0	60.557	0	-1.7	-3.37302	4.71429	-0.715488
1841562	1493697	Argentina	female	neutered	2006-04-03	Teckel	12	8	10	341	Dry	Satiety Weight Management Dry	2015-04-03	1	2015-04-03	-1	0	-1	0	0	#N/A	330.667	-31	58.802	-5.513	0	0	0
1841562	1493697	Argentina	female	neutered	2006-04-03	Teckel	11.5	8	10	341	Dry	Satiety Weight Management Dry	2015-04-03	2	2015-04-18	0	-1	-1	-0.5	2.14286	-1.94444	330.667	-31	58.802	-5.513	-0.5	-4.16667	2.14286	-1.94444
1841562	1493697	Argentina	female	neutered	2006-04-03	Teckel	11.4	8	10	341	Dry	Satiety Weight Management Dry	2015-04-03	3	2015-05-04	0	0	-1	-0.6	4.42857	-1.12903	330.667	-31	58.802	-5.513	-0.1	-0.833333	2.28571	-0.364583
1841562	1493697	Argentina	female	neutered	2006-04-03	Teckel	11.4	8	10	310	Dry	Satiety Weight Management Dry	2015-04-03	4	2015-05-18	0	0	-1	-0.6	6.42857	-0.777778	330.667	-31	58.802	-5.513	0	0	2	0
1841562	1493697	Argentina	female	neutered	2006-04-03	Teckel	11	8	10	279	Dry	Satiety Weight Management Dry	2015-04-03	5	2015-07-07	0	0	-1	-1	13.5714	-0.614035	330.667	-31	58.802	-5.513	-0.4	-3.33333	7.14286	-0.466667
1841576	1280111	Italy	female	intact	2005-04-03	MINI	7.7	7	6.42	284	Dry	Satiety Small Dog	2015-04-03	1	2015-04-03	0	0	-1	0	0	#N/A	306.5	27	75.994	6.694	0	0	0
1841576	1280111	Italy	female	intact	2005-04-03	MINI	7	7	6.42	311	Dry	Satiety Small Dog	2015-04-03	2	2015-04-17	0	0	-1	-0.7	2	-4.54545	306.5	27	75.994	6.694	-0.7	-9.09091	2	-4.54545
1841576	1280111	Italy	female	intact	2005-04-03	MINI	6.8	7	6.42	311	Dry	Satiety Small Dog	2015-04-03	3	2015-05-02	0	0	-1	-0.9	4.14286	-2.82132	306.5	27	75.994	6.694	-0.2	-2.5974	2.14286	-1.21212
1841576	1280111	Italy	female	intact	2005-04-03	MINI	6.6	7	6.42	311	Dry	Satiety Small Dog	2015-04-03	4	2015-05-22	0	0	-1	-1.1	7	-2.04082	306.5	27	75.994	6.694	-0.2	-2.5974	2.85714	-0.909091
1841576	1280111	Italy	female	intact	2005-04-03	MINI	6.4	7	6.42	311	Dry	Satiety Small Dog	2015-04-03	5	2015-06-25	1	1	0	-1.3	11.8571	-1.42388	306.5	27	75.994	6.694	-0.2	-2.5974	4.85714	-0.534759
1841583	1493697	Argentina	female	neutered	2006-04-03	Medium	19	7	15.83	481	Dry	Satiety Weight Management Dry	2015-04-03	1	2015-04-03	0	0	-3	0	0	#N/A	524.333	52	66.069	6.552	0	0	0
1841583	1493697	Argentina	female	neutered	2006-04-03	Medium	17.5	7	15.83	533	Dry	Satiety Weight Management Dry	2015-04-03	2	2015-04-18	0	0	-3	-1.5	2.14286	-3.68421	524.333	52	66.069	6.552	-1.5	-7.89474	2.14286	-3.68421
1841583	1493697	Argentina	female	neutered	2006-04-03	Medium	17.6	7	15.83	533	Dry	Satiety Weight Management Dry	2015-04-03	3	2015-05-04	0	0	-3	-1.4	4.42857	-1.66384	524.333	52	66.069	6.552	0.1	0.526316	2.28571	0.230263
1841583	1493697	Argentina	female	neutered	2006-04-03	Medium	17.6	7	15.83	533	Dry	Satiety Weight Management Dry	2015-04-03	4	2015-05-18	0	0	-3	-1.4	6.42857	-1.1462	524.333	52	66.069	6.552	0	0	2	0
1841583	1493697	Argentina	female	neutered	2006-04-03	Medium	18	7	15.83	481	Dry	Satiety Weight Management Dry	2015-04-03	5	2015-07-07	0	0	-3	-1	13.5714	-0.387812	524.333	52	66.069	6.552	0.4	2.10526	7.14286	0.294737
1841600	1512759	Greece	male	neutered	2011-04-11	Maxi	38.86	8	29.89	900	Dry	Satiety Weight Management Dry	2015-04-03	1	2015-04-03	-1	1	-1	0	0	#N/A	872	-84	68.214	-6.571	0	0	0
1841600	1512759	Greece	male	neutered	2011-04-11	Maxi	37.4	8	29.89	900	Dry	Satiety Weight Management Dry	2015-04-03	2	2015-04-19	0	0	-1	-1.46	2.28571	-1.64372	872	-84	68.214	-6.571	-1.46	-3.75708	2.28571	-1.64372
1841600	1512759	Greece	male	neutered	2011-04-11	Maxi	36.8	8	29.89	900	Dry	Satiety Weight Management Dry	2015-04-03	3	2015-04-30	0	1	-1	-2.06	3.85714	-1.37435	872	-84	68.214	-6.571	-0.6	-1.544	1.57143	-0.982548
1841600	1512759	Greece	male	neutered	2011-04-11	Maxi	36.65	8	29.89	816	Dry	Satiety Weight Management Dry	2015-04-03	4	2015-05-30	0	0	-1	-2.21	8.14286	-0.698414	872	-84	68.214	-6.571	-0.15	-0.386001	4.28571	-0.0900669
1841600	1512759	Greece	male	neutered	2011-04-11	Maxi	35.5	8	29.89	732	Dry	Satiety Weight Management Dry	2015-04-03	5	2015-06-30	0	1	0	-3.36	12.5714	-0.687784	872	-84	68.214	-6.571	-1.15	-2.95934	4.42857	-0.668238
1844500	1523340	Canada	male	neutered	2012-01-03	Golden Retriever	53.4	7	38.14	1081	Dry	Satiety Weight Management Dry	2015-04-04	1	2015-04-04	1	1	-1	0	0	#N/A	900.833	-287	58.696	-18.7	0	0	0
1844500	1523340	Canada	male	neutered	2012-01-03	Golden Retriever	52.8	7	38.14	980	Dry	Satiety Weight Management Dry	2015-04-04	2	2015-04-21	1	1	-1	-0.6	2.42857	-0.462657	900.833	-287	58.696	-18.7	-0.6	-1.1236	2.42857	-0.462657
1844500	1523340	Canada	male	neutered	2012-01-03	Golden Retriever	51.4	7	38.14	878	Dry	Satiety Weight Management Dry	2015-04-04	3	2015-05-15	1	1	0	-2	5.85714	-0.639445	900.833	-287	58.696	-18.7	-1.4	-2.62172	3.42857	-0.764669
1844500	1523340	Canada	male	neutered	2012-01-03	Golden Retriever	49.2	7	38.14	794	Dry	Satiety Weight Management Dry	2015-04-04	4	2015-06-03	1	1	0	-4.2	8.57143	-0.917603	900.833	-287	58.696	-18.7	-2.2	-4.11985	2.71429	-1.51784
1844500	1523340	Canada	male	neutered	2012-01-03	Golden Retriever	49	7	38.14	710	Dry	Satiety Weight Management Dry	2015-04-04	5	2015-06-28	1	1	0	-4.4	12.1429	-0.678564	900.833	-287	58.696	-18.7	-0.2	-0.374532	3.57143	-0.104869
1844510	1504394	USA	female	neutered	2007-10-04	Labrador Retriever	49.7142	7	35.5121	881	Dry	Satiety Weight Management Dry	2015-04-04	1	2015-04-04	0	1	-3	0	0	#N/A	801	-160	55.062	-10.999	0	0	0
1844510	1504394	USA	female	neutered	2007-10-04	Labrador Retriever	48.5349	7	35.5121	881	Dry	Satiety Weight Management Dry	2015-04-04	2	2015-04-18	0	1	-3	-1.17935	2	-1.18613	801	-160	55.062	-10.999	-1.17935	-2.37226	2	-1.18613
1844510	1504394	USA	female	neutered	2007-10-04	Labrador Retriever	47.7184	7	35.5121	801	Dry	Satiety Weight Management Dry	2015-04-04	3	2015-05-03	0	1	-1	-1.99583	4.14286	-0.969041	801	-160	55.062	-10.999	-0.816475	-1.64234	2.14286	-0.766423
1844510	1504394	USA	female	neutered	2007-10-04	Labrador Retriever	46.4483	7	35.5121	721	Dry	Satiety Weight Management Dry	2015-04-04	4	2015-06-06	1	1	-1	-3.2659	9	-0.729927	801	-160	55.062	-10.999	-1.27007	-2.55474	4.85714	-0.525977
1844510	1504394	USA	female	neutered	2007-10-04	Labrador Retriever	45.4504	7	35.5121	657	Dry	Satiety Weight Management Dry	2015-04-04	5	2015-07-05	1	1	-1	-4.26381	13.1429	-0.652571	801	-160	55.062	-10.999	-0.997913	-2.0073	4.14286	-0.484521
1845331	1524391	Portugal	male	intact	2005-04-01	Labrador Retriever	34.3	8	29	1004	Dry	Satiety Weight Management Dry	2015-04-06	1	2015-04-06	-1	0	-3	0	0	#N/A	972	-96	77.78	-7.682	0	0	0
1845331	1524391	Portugal	male	intact	2005-04-01	Labrador Retriever	33.1	8	29	1004	Dry	Satiety Weight Management Dry	2015-04-06	2	2015-04-20	-1	0	-2	-1.2	2	-1.74927	972	-96	77.78	-7.682	-1.2	-3.49854	2	-1.74927
1845331	1524391	Portugal	male	intact	2005-04-01	Labrador Retriever	32.7	8	29	1004	Dry	Satiety Weight Management Dry	2015-04-06	3	2015-05-06	-1	0	-2	-1.6	4.28571	-1.08844	972	-96	77.78	-7.682	-0.4	-1.16618	2.28571	-0.510204
1845331	1524391	Portugal	male	intact	2005-04-01	Labrador Retriever	32.2	8	29	908	Dry	Satiety Weight Management Dry	2015-04-06	4	2015-06-03	-1	0	-2	-2.1	8.28571	-0.738916	972	-96	77.78	-7.682	-0.5	-1.45773	4	-0.364431
1845331	1524391	Portugal	male	intact	2005-04-01	Labrador Retriever	31.2	8	29	812	Dry	Satiety Weight Management Dry	2015-04-06	5	2015-07-03	-1	0	-2	-3.1	12.5714	-0.718924	972	-96	77.78	-7.682	-1	-2.91545	4.28571	-0.680272
1845366	1491877	USA	female	neutered	2008-06-29	Labrador Retriever	21.5912	7	16.7831	502	Dry	Satiety Weight Management Dry	2015-04-06	1	2015-04-06	1	1	-1	0	0	#N/A	511.167	0	61.647	0	0	0	0
1845366	1491877	USA	female	neutered	2008-06-29	Labrador Retriever	19.7768	7	16.7831	557	Dry	Satiety Weight Management Dry	2015-04-06	2	2015-04-16	1	1	0	-1.81439	1.42857	-5.88235	511.167	0	61.647	0	-1.81439	-8.40336	1.42857	-5.88235
1845366	1491877	USA	female	neutered	2008-06-29	Labrador Retriever	20.6387	7	16.7831	502	Dry	Satiety Weight Management Dry	2015-04-06	3	2015-05-14	1	1	0	-0.952554	5.42857	-0.812693	511.167	0	61.647	0	0.861834	3.9916	4	0.997899
1845366	1491877	USA	female	neutered	2008-06-29	Labrador Retriever	18.8243	7	16.7831	502	Dry	Satiety Weight Management Dry	2015-04-06	4	2015-05-21	1	1	0	-2.76694	6.42857	-1.99346	511.167	0	61.647	0	-1.81439	-8.40336	1	-8.40336
1845366	1491877	USA	female	neutered	2008-06-29	Labrador Retriever	18.3707	7	16.7831	502	Dry	Satiety Weight Management Dry	2015-04-06	5	2015-06-23	1	1	0	-3.22054	11.1429	-1.33861	511.167	0	61.647	0	-0.453597	-2.10084	4.71429	-0.445633
1845381	1512747	USA	female	neutered	2008-05-11	others	27.3973	8	22.8295	632	Dry	Satiety Weight Management Dry	2015-04-06	1	2015-04-06	0	0	-1	0	0	#N/A	613	-57	58.693	-5.458	0	0	0
1845381	1512747	USA	female	neutered	2008-05-11	others	26.5354	8	22.8295	632	Dry	Satiety Weight Management Dry	2015-04-06	2	2015-04-20	0	1	-1	-0.861834	2	-1.57285	613	-57	58.693	-5.458	-0.861834	-3.1457	2	-1.57285
1845381	1512747	USA	female	neutered	2008-05-11	others	25.6736	8	22.8295	632	Dry	Satiety Weight Management Dry	2015-04-06	3	2015-05-07	0	1	0	-1.72367	4.42857	-1.42064	613	-57	58.693	-5.458	-0.861834	-3.1457	2.42857	-1.29529
1845381	1512747	USA	female	neutered	2008-05-11	others	25.0612	8	22.8295	575	Dry	Satiety Weight Management Dry	2015-04-06	4	2015-06-05	1	1	0	-2.33602	8.57143	-0.994757	613	-57	58.693	-5.458	-0.612356	-2.2351	4.14286	-0.539507
1845381	1512747	USA	female	neutered	2008-05-11	others	22.5438	8	22.8295	575	Dry	Satiety Weight Management Dry	2015-04-06	5	2015-07-13	0	1	0	-4.85349	14	-1.26537	613	-57	58.693	-5.458	-2.51746	-9.18874	5.42857	-1.69266
1845541	1523988	Greece	female	neutered	2012-05-11	Yorkshire Terrier	5.54	9	4.26	180	Dry	Satiety Small Dog	2015-04-07	1	2015-04-07	0	0	-1	0	0	#N/A	165.5	-20	55.814	-6.745	0	0	0
1845541	1523988	Greece	female	neutered	2012-05-11	Yorkshire Terrier	5.36	9	4.26	173	Dry	Satiety Small Dog	2015-04-07	2	2015-04-21	0	0	-1	-0.18	2	-1.62455	165.5	-20	55.814	-6.745	-0.18	-3.2491	2	-1.62455
1845541	1523988	Greece	female	neutered	2012-05-11	Yorkshire Terrier	5.16	9	4.26	160	Dry	Satiety Small Dog	2015-04-07	3	2015-05-05	0	0	-1	-0.38	4	-1.7148	165.5	-20	55.814	-6.745	-0.2	-3.61011	2	-1.80505
1845541	1523988	Greece	female	neutered	2012-05-11	Yorkshire Terrier	4.8	9	4.26	160	Dry	Satiety Small Dog	2015-04-07	4	2015-06-09	0	0	0	-0.74	9	-1.48416	165.5	-20	55.814	-6.745	-0.36	-6.49819	5	-1.29964
1845541	1523988	Greece	female	neutered	2012-05-11	Yorkshire Terrier	4.8	9	4.26	147	Dry	Satiety Small Dog	2015-04-07	5	2015-07-09	-1	0	-1	-0.74	13.2857	-1.0054	165.5	-20	55.814	-6.745	0	0	4.28571	0
1845846	1499561	Hungary	female	neutered	2010-09-15	Dachshund	7.8	8	6.5	247	Dry	Satiety Small Dog	2015-04-07	1	2015-04-07	0	1	0	0	0	#N/A	247	0	60.675	0	0	0	0
1845846	1499561	Hungary	female	neutered	2010-09-15	Dachshund	7.6	8	6.5	247	Dry	Satiety Small Dog	2015-04-07	2	2015-04-23	0	1	0	-0.2	2.28571	-1.12179	247	0	60.675	0	-0.2	-2.5641	2.28571	-1.12179
1845846	1499561	Hungary	female	neutered	2010-09-15	Dachshund	7.4	8	6.5	247	Dry	Satiety Small Dog	2015-04-07	3	2015-05-07	1	1	0	-0.4	4.28571	-1.19658	247	0	60.675	0	-0.2	-2.5641	2	-1.28205
1845846	1499561	Hungary	female	neutered	2010-09-15	Dachshund	7	8	6.5	247	Dry	Satiety Small Dog	2015-04-07	4	2015-06-04	1	1	0	-0.8	8.28571	-1.23784	247	0	60.675	0	-0.4	-5.12821	4	-1.28205
1845846	1499561	Hungary	female	neutered	2010-09-15	Dachshund	6.85	8	6.5	224	Dry	Satiety Small Dog	2015-04-07	5	2015-07-02	1	1	0	-0.95	12.2857	-0.991354	247	0	60.675	0	-0.15	-1.92308	4	-0.480769
1845997	1493735	Italy	male	intact	2010-04-05	Labrador Retriever	42.7	7	30.5	1043	Dry	Satiety Weight Management Dry	2015-04-07	1	2015-04-07	-1	-1	-2	0	0	#N/A	864.333	-286	66.597	-22.036	0	0	0
1845997	1493735	Italy	male	intact	2010-04-05	Labrador Retriever	42.45	7	30.5	943	Dry	Satiety Weight Management Dry	2015-04-07	2	2015-04-22	-1	-1	0	-0.25	2.14286	-0.273224	864.333	-286	66.597	-22.036	-0.25	-0.58548	2.14286	-0.273224
1845997	1493735	Italy	male	intact	2010-04-05	Labrador Retriever	42.4	7	30.5	843	Dry	Satiety Weight Management Dry	2015-04-07	3	2015-05-16	-1	-1	0	-0.3	5.57143	-0.126103	864.333	-286	66.597	-22.036	-0.05	-0.117096	3.42857	-0.034153
1845997	1493735	Italy	male	intact	2010-04-05	Labrador Retriever	42	7	30.5	757	Dry	Satiety Weight Management Dry	2015-04-07	4	2015-05-28	0	0	0	-0.7	7.28571	-0.225008	864.333	-286	66.597	-22.036	-0.4	-0.936768	1.71429	-0.546448
1845997	1493735	Italy	male	intact	2010-04-05	Labrador Retriever	41	7	30.5	686	Dry	Satiety Weight Management Dry	2015-04-07	5	2015-06-16	0	0	-1	-1.7	10	-0.398126	864.333	-286	66.597	-22.036	-1	-2.34192	2.71429	-0.862813
1846003	1298622	Italy	female	neutered	2006-12-15	MINI	14.9	7	11.46	377	Mix feeding	wet product : Satiety Weight Management Canine / dry product : Satiety Small Dog	2015-04-07	1	2015-04-07	0	0	-3	0	0	#N/A	377	0	60.528	0	0	0	0
1846003	1298622	Italy	female	neutered	2006-12-15	MINI	14.3	7	11.46	377	Mix feeding	wet product : Satiety Weight Management Canine / dry product : Satiety Small Dog	2015-04-07	2	2015-04-22	1	1	-1	-0.6	2.14286	-1.87919	377	0	60.528	0	-0.6	-4.02685	2.14286	-1.87919
1846003	1298622	Italy	female	neutered	2006-12-15	MINI	13.63	7	11.46	377	Mix feeding	wet product : Satiety Weight Management Canine / dry product : Satiety Small Dog	2015-04-07	3	2015-05-07	1	1	0	-1.27	4.28571	-1.98881	377	0	60.528	0	-0.67	-4.49664	2.14286	-2.09843
1846003	1298622	Italy	female	neutered	2006-12-15	MINI	13.2	7	11.46	377	Mix feeding	wet product : Satiety Weight Management Canine / dry product : Satiety Small Dog	2015-04-07	4	2015-06-04	1	1	0	-1.7	8.28571	-1.377	377	0	60.528	0	-0.43	-2.88591	4	-0.721477
1846003	1298622	Italy	female	neutered	2006-12-15	MINI	12.7	7	11.46	377	Mix feeding	wet product : Satiety Weight Management Canine / dry product : Satiety Small Dog	2015-04-07	5	2015-07-04	1	1	0	-2.2	12.5714	-1.1745	377	0	60.528	0	-0.5	-3.3557	4.28571	-0.782998
1846088	1493735	Italy	male	neutered	2013-10-10	Carlino	13.2	8	9.43	379	Dry	Satiety Small Dog	2015-04-07	1	2015-04-07	-1	-1	-2	0	0	#N/A	316.167	-100	58.753	-18.583	0	0	0
1846088	1493735	Italy	male	neutered	2013-10-10	Carlino	13.55	8	9.43	344	Dry	Satiety Small Dog	2015-04-07	2	2015-04-22	0	-1	-1	0.35	2.14286	1.23737	316.167	-100	58.753	-18.583	0.35	2.65152	2.14286	1.23737
1846088	1493735	Italy	male	neutered	2013-10-10	Carlino	13.55	8	9.43	308	Dry	Satiety Small Dog	2015-04-07	3	2015-05-16	0	-1	-1	0.35	5.57143	0.475913	316.167	-100	58.753	-18.583	0	0	3.42857	0
1846088	1493735	Italy	male	neutered	2013-10-10	Carlino	13.45	8	9.43	279	Dry	Satiety Small Dog	2015-04-07	4	2015-05-28	0	-1	-1	0.25	7.28571	0.259952	316.167	-100	58.753	-18.583	-0.1	-0.757576	1.71429	-0.441919
1846088	1493735	Italy	male	neutered	2013-10-10	Carlino	13.1	8	9.43	249	Dry	Satiety Small Dog	2015-04-07	5	2015-06-16	0	0	-1	-0.1	10	-0.0757576	316.167	-100	58.753	-18.583	-0.35	-2.65152	2.71429	-0.976874
1846159	1510444	Germany	male	neutered	2010-08-01	Maxi	31.2	9	26	811	Mix feeding	wet product : Satiety Weight Management Canine / dry product : Satiety Weight Management Dry	2015-04-08	1	2015-04-08	0	0	-2	0	0	#N/A	785.667	-76	68.235	-6.601	0	0	0
1846159	1510444	Germany	male	neutered	2010-08-01	Maxi	30.2	9	26	811	Mix feeding	wet product : Satiety Weight Management Canine / dry product : Satiety Weight Management Dry	2015-04-08	2	2015-04-23	0	0	-1	-1	2.14286	-1.49573	785.667	-76	68.235	-6.601	-1	-3.20513	2.14286	-1.49573
1846159	1510444	Germany	male	neutered	2010-08-01	Maxi	29.9	9	26	811	Mix feeding	wet product : Satiety Weight Management Canine / dry product : Satiety Weight Management Dry	2015-04-08	3	2015-05-07	0	1	0	-1.3	4.14286	-1.00575	785.667	-76	68.235	-6.601	-0.3	-0.961538	2	-0.480769
1846159	1510444	Germany	male	neutered	2010-08-01	Maxi	29.3	9	26	735	Mix feeding	wet product : Satiety Weight Management Canine / dry product : Satiety Weight Management Dry	2015-04-08	4	2015-06-03	1	1	-2	-1.9	8	-0.761218	785.667	-76	68.235	-6.601	-0.6	-1.92308	3.85714	-0.498575
1846159	1510444	Germany	male	neutered	2010-08-01	Maxi	29.7	9	26	659	Mix feeding	wet product : Satiety Weight Management Canine / dry product : Satiety Weight Management Dry	2015-04-08	5	2015-07-01	-1	-1	-3	-1.5	12	-0.400641	785.667	-76	68.235	-6.601	0.4	1.28205	4	0.320513
1846162	1273259	Italy	male	intact	2006-06-18	Labrador Retriever	37	7	30	1030	Dry	Satiety Weight Management Dry	2015-04-08	1	2015-04-08	1	1	-2	0	0	#N/A	1030	0	80.352	0	0	0	0
1846162	1273259	Italy	male	intact	2006-06-18	Labrador Retriever	36.5	7	30	1030	Dry	Satiety Weight Management Dry	2015-04-08	2	2015-04-22	1	1	-2	-0.5	2	-0.675676	1030	0	80.352	0	-0.5	-1.35135	2	-0.675676
1846162	1273259	Italy	male	intact	2006-06-18	Labrador Retriever	36.3	7	30	1030	Dry	Satiety Weight Management Dry	2015-04-08	3	2015-05-06	1	1	-3	-0.7	4	-0.472973	1030	0	80.352	0	-0.2	-0.540541	2	-0.27027
1846162	1273259	Italy	male	intact	2006-06-18	Labrador Retriever	35.5	7	30	1030	Dry	Satiety Weight Management Dry	2015-04-08	4	2015-06-06	1	1	-3	-1.5	8.42857	-0.480989	1030	0	80.352	0	-0.8	-2.16216	4.42857	-0.48823
1846162	1273259	Italy	male	intact	2006-06-18	Labrador Retriever	35.5	7	30	1030	Dry	Satiety Weight Management Dry	2015-04-08	5	2015-07-06	1	1	-3	-1.5	12.7143	-0.318858	1030	0	80.352	0	0	0	4.28571	0
1846188	1230597	Italy	male	intact	2007-06-12	Maltese	8	9	6.7	335	Dry	Satiety Small Dog	2015-04-08	1	2015-04-08	1	0	-2	0	0	#N/A	335	0	80.443	0	0	0	0
1846188	1230597	Italy	male	intact	2007-06-12	Maltese	7.6	9	6.7	335	Dry	Satiety Small Dog	2015-04-08	2	2015-04-21	0	1	-1	-0.4	1.85714	-2.69231	335	0	80.443	0	-0.4	-5	1.85714	-2.69231
1846188	1230597	Italy	male	intact	2007-06-12	Maltese	7.3	9	6.7	335	Dry	Satiety Small Dog	2015-04-08	3	2015-05-08	0	0	0	-0.7	4.28571	-2.04167	335	0	80.443	0	-0.3	-3.75	2.42857	-1.54412
1846188	1230597	Italy	male	intact	2007-06-12	Maltese	7	9	6.7	335	Dry	Satiety Small Dog	2015-04-08	4	2015-06-09	1	1	-3	-1	8.85714	-1.41129	335	0	80.443	0	-0.3	-3.75	4.57143	-0.820312
1846188	1230597	Italy	male	intact	2007-06-12	Maltese	6.9	9	6.7	335	Dry	Satiety Small Dog	2015-04-08	5	2015-07-08	0	1	-2	-1.1	13	-1.05769	335	0	80.443	0	-0.1	-1.25	4.14286	-0.301724
1846912	1516948	Argentina	female	intact	2012-04-07	Labrador Retriever	35	9	29.17	884	Dry	Satiety Weight Management Dry	2015-04-08	1	2015-04-08	-1	-1	-3	0	0	#N/A	884	0	70.429	0	0	0	0
1846912	1516948	Argentina	female	intact	2012-04-07	Labrador Retriever	32.75	9	29.17	884	Dry	Satiety Weight Management Dry	2015-04-08	2	2015-04-25	0	0	-2	-2.25	2.42857	-2.64706	884	0	70.429	0	-2.25	-6.42857	2.42857	-2.64706
1846912	1516948	Argentina	female	intact	2012-04-07	Labrador Retriever	32.3	9	29.17	884	Dry	Satiety Weight Management Dry	2015-04-08	3	2015-05-09	0	0	-2	-2.7	4.42857	-1.74194	884	0	70.429	0	-0.45	-1.28571	2	-0.642857
1846912	1516948	Argentina	female	intact	2012-04-07	Labrador Retriever	31.4	9	29.17	884	Dry	Satiety Weight Management Dry	2015-04-08	4	2015-06-06	0	0	-2	-3.6	8.42857	-1.22034	884	0	70.429	0	-0.9	-2.57143	4	-0.642857
1846912	1516948	Argentina	female	intact	2012-04-07	Labrador Retriever	30.9	9	29.17	801	Dry	Satiety Weight Management Dry	2015-04-08	5	2015-07-03	0	0	-2	-4.1	12.2857	-0.953488	884	0	70.429	0	-0.5	-1.42857	3.85714	-0.37037
1846967	1515198	Czech Republic	female	intact	2009-04-09	Whippet	15	9	12.5	469	Dry	Satiety Weight Management Dry	2015-04-08	1	2015-04-08	0	0	0	0	0	#N/A	390.667	-125	58.766	-18.803	0	0	0
1846967	1515198	Czech Republic	female	intact	2009-04-09	Whippet	14.6	9	12.5	425	Dry	Satiety Weight Management Dry	2015-04-08	2	2015-04-30	0	0	-1	-0.4	3.14286	-0.848485	390.667	-125	58.766	-18.803	-0.4	-2.66667	3.14286	-0.848485
1846967	1515198	Czech Republic	female	intact	2009-04-09	Whippet	14.4	9	12.5	381	Dry	Satiety Weight Management Dry	2015-04-08	3	2015-05-11	0	0	0	-0.6	4.71429	-0.848485	390.667	-125	58.766	-18.803	-0.2	-1.33333	1.57143	-0.848485
1846967	1515198	Czech Republic	female	intact	2009-04-09	Whippet	14	9	12.5	344	Dry	Satiety Weight Management Dry	2015-04-08	4	2015-06-05	0	1	0	-1	8.28571	-0.804598	390.667	-125	58.766	-18.803	-0.4	-2.66667	3.57143	-0.746667
1846967	1515198	Czech Republic	female	intact	2009-04-09	Whippet	13.8	9	12.5	308	Dry	Satiety Weight Management Dry	2015-04-08	5	2015-07-03	0	1	0	-1.2	12.2857	-0.651163	390.667	-125	58.766	-18.803	-0.2	-1.33333	4	-0.333333
1846983	1515198	Czech Republic	female	intact	2005-07-25	Labrador Retriever	80	8	45	1224	Dry	Satiety Weight Management Dry	2015-04-08	1	2015-04-08	-1	-1	-3	0	0	#N/A	1224	0	70.449	0	0	0	0
1846983	1515198	Czech Republic	female	intact	2005-07-25	Labrador Retriever	77	8	45	1224	Dry	Satiety Weight Management Dry	2015-04-08	2	2015-04-27	-1	0	-2	-3	2.71429	-1.38158	1224	0	70.449	0	-3	-3.75	2.71429	-1.38158
1846983	1515198	Czech Republic	female	intact	2005-07-25	Labrador Retriever	74.6	8	45	1224	Dry	Satiety Weight Management Dry	2015-04-08	3	2015-05-11	0	0	-1	-5.4	4.71429	-1.43182	1224	0	70.449	0	-2.4	-3	2	-1.5
1846983	1515198	Czech Republic	female	intact	2005-07-25	Labrador Retriever	73.1	8	45	1224	Dry	Satiety Weight Management Dry	2015-04-08	4	2015-05-28	0	0	-1	-6.9	7.14286	-1.2075	1224	0	70.449	0	-1.5	-1.875	2.42857	-0.772059
1846983	1515198	Czech Republic	female	intact	2005-07-25	Labrador Retriever	60	8	45	1224	Dry	Satiety Weight Management Dry	2015-04-08	5	2015-07-14	0	0	0	-20	13.8571	-1.80412	1224	0	70.449	0	-13.1	-16.375	6.71429	-2.43883
1847110	1273259	Italy	female	neutered	2010-06-06	Carlino	8.8	7	6.29	241	Dry	Satiety Weight Management Dry	2015-04-08	1	2015-04-08	0	1	-3	0	0	#N/A	241	0	60.678	0	0	0	0
1847110	1273259	Italy	female	neutered	2010-06-06	Carlino	8.8	7	6.29	241	Dry	Satiety Small Dog	2015-04-08	2	2015-04-22	1	1	-3	0	2	0	241	0	60.678	0	0	0	2	0
1847110	1273259	Italy	female	neutered	2010-06-06	Carlino	8.4	7	6.29	241	Dry	Satiety Small Dog	2015-04-08	3	2015-05-06	1	1	-3	-0.4	4	-1.13636	241	0	60.678	0	-0.4	-4.54545	2	-2.27273
1847110	1273259	Italy	female	neutered	2010-06-06	Carlino	8.6	7	6.29	241	Dry	Satiety Small Dog	2015-04-08	4	2015-06-05	1	1	-3	-0.2	8.28571	-0.274295	241	0	60.678	0	0.2	2.27273	4.28571	0.530303
1847110	1273259	Italy	female	neutered	2010-06-06	Carlino	8.3	7	6.29	241	Dry	Satiety Small Dog	2015-04-08	5	2015-07-06	1	1	-2	-0.5	12.7143	-0.446885	241	0	60.678	0	-0.3	-3.40909	4.42857	-0.769795
1847152	1516936	Canada	male	neutered	2005-04-01	Golden Retriever	46.8	8	39	1099	Dry	Satiety Weight Management Dry	2015-04-13	1	2015-04-13	0	1	0	0	0	#N/A	1064.67	-103	68.221	-6.6	0	0	0
1847152	1516936	Canada	male	neutered	2005-04-01	Golden Retriever	45.7	8	39	1099	Dry	Satiety Weight Management Dry	2015-04-13	2	2015-04-28	0	1	0	-1.1	2.14286	-1.09687	1064.67	-103	68.221	-6.6	-1.1	-2.35043	2.14286	-1.09687
1847152	1516936	Canada	male	neutered	2005-04-01	Golden Retriever	44.7	8	39	1099	Dry	Satiety Weight Management Dry	2015-04-13	3	2015-05-11	0	1	0	-2.1	4	-1.12179	1064.67	-103	68.221	-6.6	-1	-2.13675	1.85714	-1.15056
1847152	1516936	Canada	male	neutered	2005-04-01	Golden Retriever	43	8	39	996	Dry	Satiety Weight Management Dry	2015-04-13	4	2015-06-12	1	1	0	-3.8	8.57143	-0.947293	1064.67	-103	68.221	-6.6	-1.7	-3.63248	4.57143	-0.794605
1847152	1516936	Canada	male	neutered	2005-04-01	Golden Retriever	41.1	8	39	996	Dry	Satiety Weight Management Dry	2015-04-13	5	2015-07-06	1	1	0	-5.7	12	-1.01496	1064.67	-103	68.221	-6.6	-1.9	-4.05983	3.42857	-1.18412
1847295	1516946	Argentina	male	intact	2003-04-08	Labrador Retriever	45	8	34.62	1256	Dry	0.5	2015-04-09	1	2015-04-09	-1	-1	-2	0	0	#N/A	#N/A	-125	#N/A	-8.758	0	0	0
1847295	1516946	Argentina	male	intact	2003-04-08	Labrador Retriever	#N/A	8	34.62	#N/A			2015-04-09	2	2015-04-23	0	-1	-1	#N/A	2	#N/A	#N/A	-125	#N/A	-8.758	#N/A	#N/A	2
1847295	1516946	Argentina	male	intact	2003-04-08	Labrador Retriever	43.45	8	34.62	1256	Dry	Satiety Weight Management Dry	2015-04-09	3	2015-05-07	0	0	-1	-1.55	4	-0.861111	#N/A	-125	#N/A	-8.758	#N/A	#N/A	2
1847295	1516946	Argentina	male	intact	2003-04-08	Labrador Retriever	42.2	8	34.62	1131	Dry	Satiety Weight Management Dry	2015-04-09	4	2015-06-12	0	0	-1	-2.8	9.14286	-0.680556	#N/A	-125	#N/A	-8.758	-1.25	-2.77778	5.14286	-0.540123
1847295	1516946	Argentina	male	intact	2003-04-08	Labrador Retriever	41.9	8	34.62	1021	Dry	Satiety Weight Management Dry	2015-04-09	5	2015-07-07	0	0	-2	-3.1	12.7143	-0.541823	#N/A	-125	#N/A	-8.758	-0.3	-0.666667	3.57143	-0.186667
1847636	1222349	Italy	female	neutered	2007-07-01	Medium	22.1	7	17	507	Dry	Satiety Weight Management Dry	2015-04-09	1	2015-04-09	-1	0	-2	0	0	#N/A	425.667	-129	50.843	-15.408	0	0	0
1847636	1222349	Italy	female	neutered	2007-07-01	Medium	21.8	7	17	461	Dry	Satiety Weight Management Dry	2015-04-09	2	2015-04-28	0	0	-2	-0.3	2.71429	-0.500119	425.667	-129	50.843	-15.408	-0.3	-1.35747	2.71429	-0.500119
1847636	1222349	Italy	female	neutered	2007-07-01	Medium	21.4	7	17	415	Dry	Satiety Weight Management Dry	2015-04-09	3	2015-05-13	0	0	-2	-0.7	4.85714	-0.652116	425.667	-129	50.843	-15.408	-0.4	-1.80995	2.14286	-0.844646
1847636	1222349	Italy	female	neutered	2007-07-01	Medium	21	7	17	378	Dry	Satiety Weight Management Dry	2015-04-09	4	2015-06-03	0	0	-1	-1.1	7.85714	-0.633484	425.667	-129	50.843	-15.408	-0.4	-1.80995	3	-0.603318
1847636	1222349	Italy	female	neutered	2007-07-01	Medium	20	7	17	341	Dry	Satiety Weight Management Dry	2015-04-09	5	2015-07-05	0	0	-1	-2.1	12.4286	-0.76455	425.667	-129	50.843	-15.408	-1	-4.52489	4.57143	-0.989819
1847695	1072650	Denmark	female	intact	2012-10-01	Cocker Spaniel	16.2	8	12.5	469	Dry	Satiety Weight Management - overvÃ¦gtsdiÃ¦t	2015-04-09	1	2015-04-09	1	1	-3	0	0	#N/A	469	0	70.549	0	0	0	0
1847695	1072650	Denmark	female	intact	2012-10-01	Cocker Spaniel	15.6	8	12.5	469	Dry	Satiety Weight Management - overvÃ¦gtsdiÃ¦t	2015-04-09	2	2015-04-23	1	1	-3	-0.6	2	-1.85185	469	0	70.549	0	-0.6	-3.7037	2	-1.85185
1847695	1072650	Denmark	female	intact	2012-10-01	Cocker Spaniel	15.4	8	12.5	469	Dry	Satiety Weight Management - overvÃ¦gtsdiÃ¦t	2015-04-09	3	2015-05-07	1	1	0	-0.8	4	-1.23457	469	0	70.549	0	-0.2	-1.23457	2	-0.617284
1847695	1072650	Denmark	female	intact	2012-10-01	Cocker Spaniel	14.6	8	12.5	469	Dry	Satiety Weight Management - overvÃ¦gtsdiÃ¦t	2015-04-09	4	2015-06-04	1	1	0	-1.6	8	-1.23457	469	0	70.549	0	-0.8	-4.93827	4	-1.23457
1847695	1072650	Denmark	female	intact	2012-10-01	Cocker Spaniel	14.2	8	12.5	469	Dry	Satiety Weight Management - overvÃ¦gtsdiÃ¦t	2015-04-09	5	2015-07-02	1	1	0	-2	12	-1.02881	469	0	70.549	0	-0.4	-2.46914	4	-0.617284
1847914	1072650	Denmark	male	intact	2009-04-09	Shetland Sheepdog	17.6	8	12	518	Mix feeding	wet product : Satiety Weight Management - overvÃ¦gtsdiÃ¦t, vÃ¥dfoder / dry product : Satiety Weight Management - overvÃ¦gtsdiÃ¦t	2015-04-09	1	2015-04-09	-1	-1	-3	0	0	#N/A	518	0	80.342	0	0	0	0
1847914	1072650	Denmark	male	intact	2009-04-09	Shetland Sheepdog	17	8	12	518	Mix feeding	wet product : Satiety Weight Management - overvÃ¦gtsdiÃ¦t, vÃ¥dfoder / dry product : Satiety Small Dog - overvÃ¦gtsdiÃ¦t	2015-04-09	2	2015-04-23	-1	-1	-3	-0.6	2	-1.70455	518	0	80.342	0	-0.6	-3.40909	2	-1.70455
1847914	1072650	Denmark	male	intact	2009-04-09	Shetland Sheepdog	16.5	8	12	518	Mix feeding	wet product : Satiety Weight Management - overvÃ¦gtsdiÃ¦t, vÃ¥dfoder / dry product : Satiety Weight Management - overvÃ¦gtsdiÃ¦t	2015-04-09	3	2015-05-08	0	1	-3	-1.1	4.14286	-1.50862	518	0	80.342	0	-0.5	-2.84091	2.14286	-1.32576
1847914	1072650	Denmark	male	intact	2009-04-09	Shetland Sheepdog	15.85	8	12	518	Mix feeding	wet product : Satiety Weight Management - overvÃ¦gtsdiÃ¦t, vÃ¥dfoder / dry product : Satiety Small Dog - overvÃ¦gtsdiÃ¦t	2015-04-09	4	2015-06-04	0	0	-3	-1.75	8	-1.2429	518	0	80.342	0	-0.65	-3.69318	3.85714	-0.957492
1847914	1072650	Denmark	male	intact	2009-04-09	Shetland Sheepdog	15.1	8	12	518	Dry	Satiety Small Dog - overvÃ¦gtsdiÃ¦t	2015-04-09	5	2015-07-09	0	0	0	-2.5	13	-1.09266	518	0	80.342	0	-0.75	-4.26136	5	-0.852273
1847968	1226844	Italy	female	neutered	2012-04-09	Cocker Spaniel Inglese	14.4	8	12	391	Mix feeding	wet product : Satiety Weight Management Canine / dry product : Satiety Weight Management Dry	2015-04-09	1	2015-04-09	0	1	0	0	0	#N/A	355.333	-71	55.112	-11.012	0	0	0
1847968	1226844	Italy	female	neutered	2012-04-09	Cocker Spaniel Inglese	14.1	8	12	391	Mix feeding	wet product : Satiety Weight Management Canine / dry product : Satiety Weight Management Dry	2015-04-09	2	2015-04-23	1	1	0	-0.3	2	-1.04167	355.333	-71	55.112	-11.012	-0.3	-2.08333	2	-1.04167
1847968	1226844	Italy	female	neutered	2012-04-09	Cocker Spaniel Inglese	14	8	12	355	Mix feeding	wet product : Satiety Weight Management Canine / dry product : Satiety Weight Management Dry	2015-04-09	3	2015-05-07	1	1	0	-0.4	4	-0.694444	355.333	-71	55.112	-11.012	-0.1	-0.694444	2	-0.347222
1847968	1226844	Italy	female	neutered	2012-04-09	Cocker Spaniel Inglese	13.3	8	12	320	Mix feeding	wet product : Satiety Weight Management Canine / dry product : Satiety Weight Management Dry	2015-04-09	4	2015-06-08	1	1	0	-1.1	8.57143	-0.891204	355.333	-71	55.112	-11.012	-0.7	-4.86111	4.57143	-1.06337
1847968	1226844	Italy	female	neutered	2012-04-09	Cocker Spaniel Inglese	13.1	8	12	291	Mix feeding	wet product : Satiety Weight Management Canine / dry product : Satiety Weight Management Dry	2015-04-09	5	2015-07-01	1	1	0	-1.3	11.8571	-0.761379	355.333	-71	55.112	-11.012	-0.2	-1.38889	3.28571	-0.422705
1848022	1525337	Italy	female	neutered	2005-11-01	Beagle	15.85	9	11.32	374	Dry	Satiety Weight Management Dry	2015-04-09	1	2015-04-09	-1	0	-2	0	0	#N/A	408.167	41	66.138	6.644	0	0	0
1848022	1525337	Italy	female	neutered	2005-11-01	Beagle	15.2	9	11.32	415	Dry	Satiety Weight Management Dry	2015-04-09	2	2015-04-16	0	0	-1	-0.65	1	-4.10095	408.167	41	66.138	6.644	-0.65	-4.10095	1	-4.10095
1848022	1525337	Italy	female	neutered	2005-11-01	Beagle	14.8	9	11.32	415	Dry	Satiety Weight Management Dry	2015-04-09	3	2015-05-07	0	0	-3	-1.05	4	-1.65615	408.167	41	66.138	6.644	-0.4	-2.52366	3	-0.84122
1848022	1525337	Italy	female	neutered	2005-11-01	Beagle	14.6	9	11.32	415	Dry	Satiety Weight Management Dry	2015-04-09	4	2015-05-21	0	1	-3	-1.25	6	-1.31441	408.167	41	66.138	6.644	-0.2	-1.26183	2	-0.630915
1848022	1525337	Italy	female	neutered	2005-11-01	Beagle	13.85	9	11.32	374	Dry	Satiety Weight Management Dry	2015-04-09	5	2015-07-09	0	0	-1	-2	13	-0.970638	408.167	41	66.138	6.644	-0.75	-4.73186	7	-0.67598
1848034	1525337	Italy	female	neutered	2010-04-08	Medium	13.15	8	9.39	325	Dry	Satiety Weight Management Dry	2015-04-09	1	2015-04-09	-1	0	-2	0	0	#N/A	354.167	35	66.025	6.525	0	0	0
1848034	1525337	Italy	female	neutered	2010-04-08	Medium	12.15	8	9.39	360	Dry	Satiety Weight Management Dry	2015-04-09	2	2015-04-22	0	0	0	-1	1.85714	-4.09476	354.167	35	66.025	6.525	-1	-7.60456	1.85714	-4.09476
1848034	1525337	Italy	female	neutered	2010-04-08	Medium	11.95	8	9.39	360	Dry	Satiety Weight Management Dry	2015-04-09	3	2015-05-07	0	0	-2	-1.2	4	-2.28137	354.167	35	66.025	6.525	-0.2	-1.52091	2.14286	-0.709759
1848034	1525337	Italy	female	neutered	2010-04-08	Medium	11.75	8	9.39	360	Dry	Satiety Weight Management Dry	2015-04-09	4	2015-05-21	0	0	-1	-1.4	6	-1.7744	354.167	35	66.025	6.525	-0.2	-1.52091	2	-0.760456
1848034	1525337	Italy	female	neutered	2010-04-08	Medium	11.1	8	9.39	360	Dry	Satiety Weight Management Dry	2015-04-09	5	2015-06-22	0	0	-1	-2.05	10.5714	-1.47467	354.167	35	66.025	6.525	-0.65	-4.94297	4.57143	-1.08127
1848062	1510442	Portugal	female	neutered	2013-05-04	Bernese Mountain Dog	34.9	7	29.08	758	Dry	Satiety Weight Management Dry	2015-04-09	1	2015-04-09	1	1	-2	0	0	#N/A	700.5	-69	55.939	-5.51	0	0	0
1848062	1510442	Portugal	female	neutered	2013-05-04	Bernese Mountain Dog	34.4	7	29.08	689	Dry	Satiety Weight Management Dry	2015-04-09	2	2015-04-23	1	0	0	-0.5	2	-0.716332	700.5	-69	55.939	-5.51	-0.5	-1.43266	2	-0.716332
1848062	1510442	Portugal	female	neutered	2013-05-04	Bernese Mountain Dog	31.5	7	29.08	689	Dry	Satiety Weight Management Dry	2015-04-09	3	2015-05-08	0	0	0	-3.4	4.14286	-2.35155	700.5	-69	55.939	-5.51	-2.9	-8.30946	2.14286	-3.87775
1848062	1510442	Portugal	female	neutered	2013-05-04	Bernese Mountain Dog	31	7	29.08	689	Dry	Satiety Weight Management Dry	2015-04-09	4	2015-05-25	0	0	0	-3.9	6.57143	-1.70051	700.5	-69	55.939	-5.51	-0.5	-1.43266	2.42857	-0.589921
1848062	1510442	Portugal	female	neutered	2013-05-04	Bernese Mountain Dog	29.7	7	29.08	689	Dry	Satiety Weight Management Dry	2015-04-09	5	2015-06-23	0	1	0	-5.2	10.7143	-1.39064	700.5	-69	55.939	-5.51	-1.3	-3.72493	4.14286	-0.899121
1848071	1406399	Spain	male	neutered	2011-04-09	Medium	20.6	7	15.85	560	Dry	Satiety Weight Management Dry	2015-04-09	1	2015-04-09	-1	0	-2	0	0	#N/A	515.833	-53	64.936	-6.672	0	0	0
1848071	1406399	Spain	male	neutered	2011-04-09	Medium	20.4	7	15.85	507	Dry	Satiety Weight Management Dry	2015-04-09	2	2015-04-23	0	1	-1	-0.2	2	-0.485437	515.833	-53	64.936	-6.672	-0.2	-0.970874	2	-0.485437
1848071	1406399	Spain	male	neutered	2011-04-09	Medium	19.6	7	15.85	507	Dry	Satiety Weight Management Dry	2015-04-09	3	2015-05-08	0	0	-1	-1	4.14286	-1.17174	515.833	-53	64.936	-6.672	-0.8	-3.8835	2.14286	-1.8123
1848071	1406399	Spain	male	neutered	2011-04-09	Medium	19.1	7	15.85	507	Dry	Satiety Weight Management Dry	2015-04-09	4	2015-05-29	0	1	-1	-1.5	7.14286	-1.01942	515.833	-53	64.936	-6.672	-0.5	-2.42718	3	-0.809061
1848071	1406399	Spain	male	neutered	2011-04-09	Medium	18.8	7	15.85	455	Dry	Satiety Weight Management Dry	2015-04-09	5	2015-06-18	1	1	-1	-1.8	10	-0.873786	515.833	-53	64.936	-6.672	-0.3	-1.45631	2.85714	-0.509709
1848255	1488111	USA	female	neutered	2013-04-08	Golden Retriever	49.8957	8	35.6391	883	Dry	Satiety Weight Management Dry	2015-04-09	1	2015-04-09	0	1	-3	0	0	#N/A	741.333	-225	50.824	-15.425	0	0	0
1848255	1488111	USA	female	neutered	2013-04-08	Golden Retriever	50.8029	8	35.6391	803	Dry	Satiety Weight Management Dry	2015-04-09	2	2015-04-23	0	1	-2	0.907194	2	0.909091	741.333	-225	50.824	-15.425	0.907194	1.81818	2	0.909091
1848255	1488111	USA	female	neutered	2013-04-08	Golden Retriever	50.3493	8	35.6391	723	Dry	Satiety Weight Management Dry	2015-04-09	3	2015-05-08	1	1	-2	0.453597	4.14286	0.219436	741.333	-225	50.824	-15.425	-0.453597	-0.909091	2.14286	-0.424242
1848255	1488111	USA	female	neutered	2013-04-08	Golden Retriever	49.8957	8	35.6391	658	Dry	Satiety Weight Management Dry	2015-04-09	4	2015-05-28	1	1	-2	0	7	0	741.333	-225	50.824	-15.425	-0.453597	-0.909091	2.85714	-0.318182
1848255	1488111	USA	female	neutered	2013-04-08	Golden Retriever	48.5349	8	35.6391	594	Dry	Satiety Weight Management Dry	2015-04-09	5	2015-06-25	1	1	-2	-1.36079	11	-0.247934	741.333	-225	50.824	-15.425	-1.36079	-2.72727	4	-0.681818
1848273	1516946	Argentina	female	neutered	2011-04-10	Maxi	27	7	22.5	705	Dry	Satiety Weight Management Dry	2015-04-10	1	2015-04-10	-1	-1	-1	0	0	#N/A	672.833	-34	65.128	-3.291	0	0	0
1848273	1516946	Argentina	female	neutered	2011-04-10	Maxi	27.45	7	22.5	648	Dry	Satiety Weight Management Dry	2015-04-10	2	2015-04-24	0	0	-1	0.45	2	0.833333	672.833	-34	65.128	-3.291	0.45	1.66667	2	0.833333
1848273	1516946	Argentina	female	neutered	2011-04-10	Maxi	25.9	7	22.5	671	Dry	Satiety Weight Management Dry	2015-04-10	3	2015-05-08	0	0	-1	-1.1	4	-1.01852	672.833	-34	65.128	-3.291	-1.55	-5.74074	2	-2.87037
1848273	1516946	Argentina	female	neutered	2011-04-10	Maxi	23.35	7	22.5	671	Dry	Satiety Weight Management Dry	2015-04-10	4	2015-06-12	0	0	-1	-3.65	9	-1.50206	672.833	-34	65.128	-3.291	-2.55	-9.44444	5	-1.88889
1848273	1516946	Argentina	female	neutered	2011-04-10	Maxi	21	7	22.5	671	Dry	Satiety Weight Management Dry	2015-04-10	5	2015-07-07	0	0	-2	-6	12.5714	-1.76768	672.833	-34	65.128	-3.291	-2.35	-8.7037	3.57143	-2.43704
1848357	1499350	Italy	female	neutered	2007-03-30	Volpino Italiano	14.9	7	11.46	377	Dry	Satiety Small Dog	2015-04-10	1	2015-04-10	0	0	-1	0	0	#N/A	377	0	60.528	0	0	0	0
1848357	1499350	Italy	female	neutered	2007-03-30	Volpino Italiano	14.1	7	11.46	377	Dry	Satiety Small Dog	2015-04-10	2	2015-04-27	0	0	-1	-0.8	2.42857	-2.21082	377	0	60.528	0	-0.8	-5.36913	2.42857	-2.21082
1848357	1499350	Italy	female	neutered	2007-03-30	Volpino Italiano	14.3	7	11.46	377	Dry	Satiety Weight Management Dry	2015-04-10	3	2015-05-11	0	0	-1	-0.6	4.42857	-0.909288	377	0	60.528	0	0.2	1.34228	2	0.671141
1848357	1499350	Italy	female	neutered	2007-03-30	Volpino Italiano	14	7	11.46	377	Dry	Satiety Weight Management Dry	2015-04-10	4	2015-06-10	0	0	-1	-0.9	8.71429	-0.693146	377	0	60.528	0	-0.3	-2.01342	4.28571	-0.469799
1848357	1499350	Italy	female	neutered	2007-03-30	Volpino Italiano	13.7	7	11.46	377	Dry	Satiety Weight Management Dry	2015-04-10	5	2015-07-14	0	0	-1	-1.2	13.5714	-0.59343	377	0	60.528	0	-0.3	-2.01342	4.85714	-0.414528
1848385	1283812	Italy	female	intact	2005-06-01	Cavalier King Charles Spaniel	9.3	7	7.15	308	Dry	Satiety Small Dog	2015-04-10	1	2015-04-10	-1	0	0	0	0	#N/A	308	0	70.44	0	0	0	0
1848385	1283812	Italy	female	intact	2005-06-01	Cavalier King Charles Spaniel	8.9	7	7.15	308	Dry	Satiety Small Dog	2015-04-10	2	2015-04-27	0	0	-1	-0.4	2.42857	-1.77103	308	0	70.44	0	-0.4	-4.30108	2.42857	-1.77103
1848385	1283812	Italy	female	intact	2005-06-01	Cavalier King Charles Spaniel	8.5	7	7.15	308	Dry	Satiety Small Dog	2015-04-10	3	2015-05-13	0	0	-1	-0.8	4.71429	-1.8247	308	0	70.44	0	-0.4	-4.30108	2.28571	-1.88172
1848385	1283812	Italy	female	intact	2005-06-01	Cavalier King Charles Spaniel	8.4	7	7.15	308	Dry	Satiety Small Dog	2015-04-10	4	2015-05-29	0	0	-2	-0.9	7	-1.38249	308	0	70.44	0	-0.1	-1.07527	2.28571	-0.47043
1848385	1283812	Italy	female	intact	2005-06-01	Cavalier King Charles Spaniel	8.15	7	7.15	308	Dry	Satiety Small Dog	2015-04-10	5	2015-07-03	1	0	0	-1.15	12	-1.03047	308	0	70.44	0	-0.25	-2.68817	5	-0.537634
1848401	1072759	Denmark	female	neutered	2007-04-22	Briard	48.1	8	40.08	964	Mix feeding	wet product : Satiety Weight Management - overvÃ¦gtsdiÃ¦t, vÃ¥dfoder / dry product : Satiety Weight Management - overvÃ¦gtsdiÃ¦t	2015-04-10	1	2015-04-10	0	0	-2	0	0	#N/A	809.5	-245	50.818	-15.38	0	0	0
1848401	1072759	Denmark	female	neutered	2007-04-22	Briard	47.4	8	40.08	877	Mix feeding	wet product : Satiety Weight Management - overvÃ¦gtsdiÃ¦t, vÃ¥dfoder / dry product : Satiety Weight Management - overvÃ¦gtsdiÃ¦t	2015-04-10	2	2015-04-21	0	0	0	-0.7	1.57143	-0.926101	809.5	-245	50.818	-15.38	-0.7	-1.4553	1.57143	-0.926101
1848401	1072759	Denmark	female	neutered	2007-04-22	Briard	46.5	8	40.08	789	Mix feeding	wet product : Satiety Weight Management - overvÃ¦gtsdiÃ¦t, vÃ¥dfoder / dry product : Satiety Weight Management - overvÃ¦gtsdiÃ¦t	2015-04-10	3	2015-05-12	0	1	-2	-1.6	4.57143	-0.727651	809.5	-245	50.818	-15.38	-0.9	-1.8711	3	-0.623701
1848401	1072759	Denmark	female	neutered	2007-04-22	Briard	45	8	40.08	719	Mix feeding	wet product : Satiety Weight Management - overvÃ¦gtsdiÃ¦t, vÃ¥dfoder / dry product : Satiety Weight Management - overvÃ¦gtsdiÃ¦t	2015-04-10	4	2015-06-04	0	0	-3	-3.1	7.85714	-0.820261	809.5	-245	50.818	-15.38	-1.5	-3.1185	3.28571	-0.94911
1848401	1072759	Denmark	female	neutered	2007-04-22	Briard	44	8	40.08	649	Mix feeding	wet product : Satiety Weight Management - overvÃ¦gtsdiÃ¦t, vÃ¥dfoder / dry product : Satiety Weight Management - overvÃ¦gtsdiÃ¦t	2015-04-10	5	2015-06-25	0	1	-3	-4.1	10.8571	-0.785097	809.5	-245	50.818	-15.38	-1	-2.079	3	-0.693001
1848451	1522584	Spain	female	neutered	2011-03-11	Medium	19.3	7	14.85	458	Mix feeding	wet product : Satiety Weight Management HÃºmedo / dry product : Satiety Weight Management Dry	2015-04-10	1	2015-04-10	0	0	-1	0	0	#N/A	430.667	-41	56.931	-5.42	0	0	0
1848451	1522584	Spain	female	neutered	2011-03-11	Medium	18.6	7	14.85	458	Mix feeding	wet product : Satiety Weight Management HÃºmedo / dry product : Satiety Weight Management Dry	2015-04-10	2	2015-05-04	0	0	-1	-0.7	3.42857	-1.05786	430.667	-41	56.931	-5.42	-0.7	-3.62694	3.42857	-1.05786
1848451	1522584	Spain	female	neutered	2011-03-11	Medium	18.45	7	14.85	417	Mix feeding	wet product : Satiety Weight Management HÃºmedo / dry product : Satiety Weight Management Dry	2015-04-10	3	2015-05-18	1	1	-2	-0.85	5.42857	-0.81129	430.667	-41	56.931	-5.42	-0.15	-0.777202	2	-0.388601
1848451	1522584	Spain	female	neutered	2011-03-11	Medium	17.7	7	14.85	417	Mix feeding	wet product : Satiety Weight Management HÃºmedo / dry product : Satiety Weight Management Dry	2015-04-10	4	2015-06-18	0	1	-2	-1.6	9.85714	-0.84103	430.667	-41	56.931	-5.42	-0.75	-3.88601	4.42857	-0.877486
1848451	1522584	Spain	female	neutered	2011-03-11	Medium	17.7	7	14.85	375	Mix feeding	wet product : Satiety Weight Management HÃºmedo / dry product : Satiety Weight Management Dry	2015-04-10	5	2015-07-17	0	0	-3	-1.6	14	-0.592154	430.667	-41	56.931	-5.42	0	0	4.14286	0
1848646	1510863	Spain	male	neutered	2011-04-29	Maxi	49.2	8	37.85	1075	Dry	Satiety Weight Management Dry	2015-04-10	1	2015-04-10	1	1	-2	0	0	#N/A	1041.33	-101	68.24	-6.619	0	0	0
1848646	1510863	Spain	male	neutered	2011-04-29	Maxi	47.8	8	37.85	1075	Dry	Satiety Weight Management Dry	2015-04-10	2	2015-04-29	1	1	-1	-1.4	2.71429	-1.04835	1041.33	-101	68.24	-6.619	-1.4	-2.84553	2.71429	-1.04835
1848646	1510863	Spain	male	neutered	2011-04-29	Maxi	46.5	8	37.85	1075	Mix feeding	wet product : Satiety Weight Management HÃºmedo / dry product : Satiety Weight Management Dry	2015-04-10	3	2015-05-18	1	1	0	-2.7	5.42857	-1.01091	1041.33	-101	68.24	-6.619	-1.3	-2.64228	2.71429	-0.97347
1848646	1510863	Spain	male	neutered	2011-04-29	Maxi	45.7	8	37.85	974	Mix feeding	wet product : Satiety Weight Management HÃºmedo / dry product : Satiety Weight Management Dry	2015-04-10	4	2015-06-02	1	1	0	-3.5	7.57143	-0.939561	1041.33	-101	68.24	-6.619	-0.8	-1.62602	2.14286	-0.758808
1848646	1510863	Spain	male	neutered	2011-04-29	Maxi	44.2	8	37.85	974	Mix feeding	wet product : Satiety Weight Management HÃºmedo / dry product : Satiety Weight Management Dry	2015-04-10	5	2015-06-19	1	1	0	-5	10	-1.01626	1041.33	-101	68.24	-6.619	-1.5	-3.04878	2.42857	-1.25538
1849176	1515214	USA	female	neutered	2009-05-23	Pug	17.3728	7	12.4104	401	Mix feeding	wet product : Satiety Weight Management Canine / dry product : Satiety Weight Management Dry	2015-04-10	1	2015-04-10	0	1	-3	0	0	#N/A	390.833	-44	59.109	-6.654	0	0	0
1849176	1515214	USA	female	neutered	2009-05-23	Pug	16.3295	7	12.4104	444	Mix feeding	wet product : Satiety Weight Management Canine / dry product : Satiety Weight Management Dry	2015-04-10	2	2015-04-23	0	1	-1	-1.04327	1.85714	-3.23358	390.833	-44	59.109	-6.654	-1.04327	-6.00522	1.85714	-3.23358
1849176	1515214	USA	female	neutered	2009-05-23	Pug	16.8738	7	12.4104	393	Mix feeding	wet product : Satiety Weight Management Canine / dry product : Satiety Weight Management Dry	2015-04-10	3	2015-05-07	0	1	-1	-0.498957	3.85714	-0.744609	390.833	-44	59.109	-6.654	0.544316	3.13316	2	1.56658
1849176	1515214	USA	female	neutered	2009-05-23	Pug	16.2388	7	12.4104	357	Mix feeding	wet product : Satiety Weight Management Canine / dry product : Satiety Weight Management Dry	2015-04-10	4	2015-06-03	0	1	-1	-1.13399	7.71429	-0.846146	390.833	-44	59.109	-6.654	-0.635036	-3.65535	3.85714	-0.947684
1849176	1515214	USA	female	neutered	2009-05-23	Pug	15.8759	7	12.4104	321	Mix feeding	wet product : Satiety Weight Management Canine / dry product : Satiety Weight Management Dry	2015-04-10	5	2015-07-06	0	0	-1	-1.49687	12.4286	-0.693257	390.833	-44	59.109	-6.654	-0.362878	-2.08877	4.71429	-0.443073
1849339	1524391	Portugal	male	neutered	2007-04-12	Labrador Retriever	40.55	8	34.5	1003	Dry	Satiety Weight Management Dry	2015-04-11	1	2015-04-11	0	1	-1	0	0	#N/A	940.333	-94	66.057	-6.603	0	0	0
1849339	1524391	Portugal	male	neutered	2007-04-12	Labrador Retriever	39	8	34.5	1003	Dry	Satiety Weight Management Dry	2015-04-11	2	2015-04-25	0	1	0	-1.55	2	-1.91122	940.333	-94	66.057	-6.603	-1.55	-3.82244	2	-1.91122
1849339	1524391	Portugal	male	neutered	2007-04-12	Labrador Retriever	39.8	8	34.5	909	Dry	Satiety Weight Management Dry	2015-04-11	3	2015-05-08	0	1	0	-0.75	3.85714	-0.479518	940.333	-94	66.057	-6.603	0.8	1.97287	1.85714	1.06232
1849339	1524391	Portugal	male	neutered	2007-04-12	Labrador Retriever	37.3	8	34.5	909	Dry	Satiety Weight Management Dry	2015-04-11	4	2015-06-02	0	1	0	-3.25	7.42857	-1.07891	940.333	-94	66.057	-6.603	-2.5	-6.16523	3.57143	-1.72626
1849339	1524391	Portugal	male	neutered	2007-04-12	Labrador Retriever	36.1	8	34.5	815	Dry	Satiety Weight Management Dry	2015-04-11	5	2015-07-02	0	1	0	-4.45	11.7143	-0.936814	940.333	-94	66.057	-6.603	-1.2	-2.95931	4.28571	-0.690506
1849352	1499563	Hungary	male	neutered	2010-04-21	Pug	12.8	7	9.85	392	Dry	Satiety Small Dog	2015-04-11	1	2015-04-11	0	0	0	0	0	#N/A	326.833	-104	58.783	-18.705	0	0	0
1849352	1499563	Hungary	male	neutered	2010-04-21	Pug	12.7	7	9.85	355	Dry	Satiety Small Dog	2015-04-11	2	2015-04-25	0	0	0	-0.1	2	-0.390625	326.833	-104	58.783	-18.705	-0.1	-0.78125	2	-0.390625
1849352	1499563	Hungary	male	neutered	2010-04-21	Pug	12.6	7	9.85	319	Dry	Satiety Small Dog	2015-04-11	3	2015-05-09	0	1	-1	-0.2	4	-0.390625	326.833	-104	58.783	-18.705	-0.1	-0.78125	2	-0.390625
1849352	1499563	Hungary	male	neutered	2010-04-21	Pug	12.8	7	9.85	288	Dry	Satiety Small Dog	2015-04-11	4	2015-06-06	1	1	-1	0	8	0	326.833	-104	58.783	-18.705	0.2	1.5625	4	0.390625
1849352	1499563	Hungary	male	neutered	2010-04-21	Pug	12.1	7	9.85	257	Dry	Satiety Small Dog	2015-04-11	5	2015-06-21	1	1	-1	-0.7	10.1429	-0.539173	326.833	-104	58.783	-18.705	-0.7	-5.46875	2.14286	-2.55208
1850304	1330125	Italy	male	neutered	2007-01-29	MINI	8.2	7	6.31	281	Dry	Satiety Small Dog	2015-04-13	1	2015-04-13	0	1	-3	0	0	#N/A	244.667	-48	61.454	-12.056	0	0	0
1850304	1330125	Italy	male	neutered	2007-01-29	MINI	8.1	7	6.31	255	Dry	Satiety Small Dog	2015-04-13	2	2015-04-27	0	1	-2	-0.1	2	-0.609756	244.667	-48	61.454	-12.056	-0.1	-1.21951	2	-0.609756
1850304	1330125	Italy	male	neutered	2007-01-29	MINI	7.9	7	6.31	233	Dry	Satiety Small Dog	2015-04-13	3	2015-05-11	0	0	-2	-0.3	4	-0.914634	244.667	-48	61.454	-12.056	-0.2	-2.43902	2	-1.21951
1850304	1330125	Italy	male	neutered	2007-01-29	MINI	7	7	6.31	233	Dry	Satiety Small Dog	2015-04-13	4	2015-06-13	0	0	-2	-1.2	8.71429	-1.67933	244.667	-48	61.454	-12.056	-0.9	-10.9756	4.71429	-2.32816
1850304	1330125	Italy	male	neutered	2007-01-29	MINI	6.7	7	6.31	233	Dry	Satiety Small Dog	2015-04-13	5	2015-07-13	0	0	-2	-1.5	13	-1.40713	244.667	-48	61.454	-12.056	-0.3	-3.65854	4.28571	-0.853659
1850313	1330125	Italy	female	neutered	2003-01-01	X-SMALL	8.4	7	6.46	246	Dry	Satiety Small Dog	2015-04-13	1	2015-04-13	-1	0	-3	0	0	#N/A	246	0	60.71	0	0	0	0
1850313	1330125	Italy	female	neutered	2003-01-01	X-SMALL	8	7	6.46	246	Dry	Satiety Small Dog	2015-04-13	2	2015-04-27	-1	-1	-2	-0.4	2	-2.38095	246	0	60.71	0	-0.4	-4.7619	2	-2.38095
1850313	1330125	Italy	female	neutered	2003-01-01	X-SMALL	8	7	6.46	246	Dry	Satiety Small Dog	2015-04-13	3	2015-05-11	-1	0	-2	-0.4	4	-1.19048	246	0	60.71	0	0	0	2	0
1850313	1330125	Italy	female	neutered	2003-01-01	X-SMALL	7.4	7	6.46	246	Dry	Satiety Small Dog	2015-04-13	4	2015-06-13	0	0	-2	-1	8.71429	-1.36612	246	0	60.71	0	-0.6	-7.14286	4.71429	-1.51515
1850313	1330125	Italy	female	neutered	2003-01-01	X-SMALL	7.3	7	6.46	246	Dry	Satiety Small Dog	2015-04-13	5	2015-07-13	-1	0	-2	-1.1	13	-1.00733	246	0	60.71	0	-0.1	-1.19048	4.28571	-0.277778
1850335	1523313	Finland	female	neutered	2011-05-15	Medium	29.5	8	24.58	668	Dry	Satiety Weight Management Dry	2015-04-13	1	2015-04-13	0	0	0	0	0	#N/A	648	-60	58.7	-5.435	0	0	0
1850335	1523313	Finland	female	neutered	2011-05-15	Medium	27.7	8	24.58	668	Dry	Satiety Weight Management Dry	2015-04-13	2	2015-04-29	0	0	-3	-1.8	2.28571	-2.66949	648	-60	58.7	-5.435	-1.8	-6.10169	2.28571	-2.66949
1850335	1523313	Finland	female	neutered	2011-05-15	Medium	28	8	24.58	668	Dry	Satiety Weight Management Dry	2015-04-13	3	2015-05-13	0	0	-1	-1.5	4.28571	-1.18644	648	-60	58.7	-5.435	0.3	1.01695	2	0.508475
1850335	1523313	Finland	female	neutered	2011-05-15	Medium	27	8	24.58	608	Dry	Satiety Weight Management Dry	2015-04-13	4	2015-06-10	0	0	-1	-2.5	8.28571	-1.02279	648	-60	58.7	-5.435	-1	-3.38983	4	-0.847458
1850335	1523313	Finland	female	neutered	2011-05-15	Medium	26.3	8	24.58	547	Dry	Satiety Weight Management Dry	2015-04-13	5	2015-07-08	0	0	-1	-3.2	12.2857	-0.882933	648	-60	58.7	-5.435	-0.7	-2.37288	4	-0.59322
1850381	1524391	Portugal	female	neutered	2009-04-11	Dachshund	11.95	7	9.19	320	Mix feeding	wet product : Satiety Weight Management Canine / dry product : Satiety Weight Management Dry	2015-04-13	1	2015-04-13	0	0	-2	0	0	#N/A	308.333	-35	58.416	-6.631	0	0	0
1850381	1524391	Portugal	female	neutered	2009-04-11	Dachshund	11.45	7	9.19	320	Mix feeding	wet product : Satiety Weight Management Canine / dry product : Satiety Weight Management Dry	2015-04-13	2	2015-04-28	0	0	-2	-0.5	2.14286	-1.95258	308.333	-35	58.416	-6.631	-0.5	-4.1841	2.14286	-1.95258
1850381	1524391	Portugal	female	neutered	2009-04-11	Dachshund	11.1	7	9.19	320	Mix feeding	wet product : Satiety Weight Management Canine / dry product : Satiety Weight Management Dry	2015-04-13	3	2015-05-12	0	1	-1	-0.85	4.14286	-1.71692	308.333	-35	58.416	-6.631	-0.35	-2.92887	2	-1.46444
1850381	1524391	Portugal	female	neutered	2009-04-11	Dachshund	10.95	7	9.19	285	Mix feeding	wet product : Satiety Weight Management Canine / dry product : Satiety Small Dog	2015-04-13	4	2015-06-11	0	1	-1	-1	8.42857	-0.992837	308.333	-35	58.416	-6.631	-0.15	-1.25523	4.28571	-0.292887
1850381	1524391	Portugal	female	neutered	2009-04-11	Dachshund	10.6	7	9.19	256	Dry	Satiety Small Dog	2015-04-13	5	2015-07-20	0	1	-1	-1.35	14	-0.806934	308.333	-35	58.416	-6.631	-0.35	-2.92887	5.57143	-0.525695
1850492	1515198	Czech Republic	female	intact	2005-04-15	MINI	12	7	9.23	373	Mix feeding	wet product : Satiety Weight Management Canine / dry product : Satiety Weight Management Dry	2015-04-13	1	2015-04-13	-1	-1	-2	0	0	#N/A	373	0	70.438	0	0	0	0
1850492	1515198	Czech Republic	female	intact	2005-04-15	MINI	11.4	7	9.23	373	Dry	Satiety Weight Management Dry	2015-04-13	2	2015-04-27	0	0	-1	-0.6	2	-2.5	373	0	70.438	0	-0.6	-5	2	-2.5
1850492	1515198	Czech Republic	female	intact	2005-04-15	MINI	11.1	7	9.23	373	Dry	Satiety Weight Management Dry	2015-04-13	3	2015-05-11	0	0	-1	-0.9	4	-1.875	373	0	70.438	0	-0.3	-2.5	2	-1.25
1850492	1515198	Czech Republic	female	intact	2005-04-15	MINI	10.9	7	9.23	373	Dry	Satiety Weight Management Dry	2015-04-13	4	2015-06-05	0	0	0	-1.1	7.57143	-1.21069	373	0	70.438	0	-0.2	-1.66667	3.57143	-0.466667
1850492	1515198	Czech Republic	female	intact	2005-04-15	MINI	10.1	7	9.23	373	Dry	Satiety Weight Management Dry	2015-04-13	5	2015-07-03	1	1	0	-1.9	11.5714	-1.36831	373	0	70.438	0	-0.8	-6.66667	4	-1.66667
1850627	1530134	Germany	female	intact	2009-01-21	Dalmatiner	35.3	9	29.42	890	Dry	Satiety Weight Management Dry	2015-04-16	1	2015-04-16	1	1	0	0	0	#N/A	764.667	-167	60.533	-13.22	0	0	0
1850627	1530134	Germany	female	intact	2009-01-21	Dalmatiner	34.4	9	29.42	806	Dry	Satiety Weight Management Dry	2015-04-16	2	2015-05-07	1	1	0	-0.9	3	-0.849858	764.667	-167	60.533	-13.22	-0.9	-2.54958	3	-0.849858
1850627	1530134	Germany	female	intact	2009-01-21	Dalmatiner	33.8	9	29.42	723	Dry	Satiety Weight Management Dry	2015-04-16	3	2015-05-21	0	0	0	-1.5	5	-0.849858	764.667	-167	60.533	-13.22	-0.6	-1.69972	2	-0.849858
1850627	1530134	Germany	female	intact	2009-01-21	Dalmatiner	32.6	9	29.42	723	Dry	Satiety Weight Management Dry	2015-04-16	4	2015-06-08	-1	-1	-2	-2.7	7.57143	-1.01021	764.667	-167	60.533	-13.22	-1.2	-3.39943	2.57143	-1.322
1850627	1530134	Germany	female	intact	2009-01-21	Dalmatiner	31.3	9	29.42	723	Dry	Satiety Weight Management Dry	2015-04-16	5	2015-06-26	0	0	-1	-4	10.1429	-1.11718	764.667	-167	60.533	-13.22	-1.3	-3.68272	2.57143	-1.43217
1850924	1524391	Portugal	female	intact	2012-04-11	Dachshund	8.45	8	6.5	287	Dry	Satiety Small Dog	2015-04-13	1	2015-04-13	0	0	-2	0	0	#N/A	287	0	70.501	0	0	0	0
1850924	1524391	Portugal	female	intact	2012-04-11	Dachshund	8.1	8	6.5	287	Dry	Satiety Small Dog	2015-04-13	2	2015-04-27	0	0	-3	-0.35	2	-2.07101	287	0	70.501	0	-0.35	-4.14201	2	-2.07101
1850924	1524391	Portugal	female	intact	2012-04-11	Dachshund	7.85	8	6.5	287	Dry	Satiety Small Dog	2015-04-13	3	2015-05-11	1	0	0	-0.6	4	-1.77515	287	0	70.501	0	-0.25	-2.95858	2	-1.47929
1850924	1524391	Portugal	female	intact	2012-04-11	Dachshund	7.7	8	6.5	287	Dry	Satiety Small Dog	2015-04-13	4	2015-06-11	1	0	0	-0.75	8.42857	-1.05305	287	0	70.501	0	-0.15	-1.77515	4.42857	-0.40084
1850924	1524391	Portugal	female	intact	2012-04-11	Dachshund	7.4	8	6.5	260	Dry	Satiety Small Dog	2015-04-13	5	2015-07-11	1	0	0	-1.05	12.7143	-0.977329	287	0	70.501	0	-0.3	-3.5503	4.28571	-0.828402
1850938	1508563	USA	female	neutered	2012-03-28	Cavalier King Charles Spaniel	15.4677	8	11.8978	388	Mix feeding	wet product : Satiety Weight Management Canine / dry product : Satiety Weight Management Dry	2015-04-13	1	2015-04-13	0	0	-1	0	0	#N/A	388	0	60.566	0	0	0	0
1850938	1508563	USA	female	neutered	2012-03-28	Cavalier King Charles Spaniel	14.5605	8	11.8978	388	Mix feeding	wet product : Satiety Weight Management Canine / dry product : Satiety Weight Management Dry	2015-04-13	2	2015-04-27	0	0	-1	-0.907194	2	-2.93255	388	0	60.566	0	-0.907194	-5.8651	2	-2.93255
1850938	1508563	USA	female	neutered	2012-03-28	Cavalier King Charles Spaniel	13.6079	8	11.8978	388	Mix feeding	wet product : Satiety Weight Management Canine / dry product : Satiety Weight Management Dry	2015-04-13	3	2015-05-11	1	1	0	-1.85975	4	-3.00587	388	0	60.566	0	-0.952554	-6.15836	2	-3.07918
1850938	1508563	USA	female	neutered	2012-03-28	Cavalier King Charles Spaniel	13.2904	8	11.8978	388	Mix feeding	wet product : Satiety Weight Management Canine / dry product : Satiety Weight Management Dry	2015-04-13	4	2015-06-06	1	1	0	-2.17727	7.71429	-1.8247	388	0	60.566	0	-0.317518	-2.05279	3.71429	-0.552673
1850938	1508563	USA	female	neutered	2012-03-28	Cavalier King Charles Spaniel	13.3811	8	11.8978	388	Mix feeding	wet product : Satiety Weight Management Canine / dry product : Satiety Weight Management Dry	2015-04-13	5	2015-07-03	1	1	0	-2.08655	11.5714	-1.16578	388	0	60.566	0	0.0907194	0.58651	3.85714	0.152058
1851001	1525369	Argentina	female	neutered	2007-06-30	Golden Retriever	42.4	8	32.62	826	Dry	Satiety Weight Management Dry	2015-04-23	1	2015-04-23	-1	-1	-1	0	0	#N/A	681	-225	49.892	-16.484	0	0	0
1851001	1525369	Argentina	female	neutered	2007-06-30	Golden Retriever	41.9	8	32.62	736	Dry	Satiety Weight Management Dry	2015-04-23	2	2015-05-09	0	0	-1	-0.5	2.28571	-0.51592	681	-225	49.892	-16.484	-0.5	-1.17925	2.28571	-0.51592
1851001	1525369	Argentina	female	neutered	2007-06-30	Golden Retriever	41	8	32.62	661	Dry	Satiety Weight Management Dry	2015-04-23	3	2015-05-23	0	0	-1	-1.4	4.28571	-0.77044	681	-225	49.892	-16.484	-0.9	-2.12264	2	-1.06132
1851001	1525369	Argentina	female	neutered	2007-06-30	Golden Retriever	40.6	8	32.62	601	Dry	Satiety Weight Management Dry	2015-04-23	4	2015-06-20	0	0	-1	-1.8	8.28571	-0.512362	681	-225	49.892	-16.484	-0.4	-0.943396	4	-0.235849
1851001	1525369	Argentina	female	neutered	2007-06-30	Golden Retriever	40.6	8	32.62	541	Dry	Satiety Weight Management Dry	2015-04-23	5	2015-07-21	0	0	-1	-1.8	12.7143	-0.333899	681	-225	49.892	-16.484	0	0	4.42857	0
1851010	1525369	Argentina	female	neutered	2012-07-01	Maxi	35	7	29.17	760	Dry	Satiety Weight Management Dry	2015-04-20	1	2015-04-20	1	1	-2	0	0	#N/A	829.167	83	66.06	6.613	0	0	0
1851010	1525369	Argentina	female	neutered	2012-07-01	Maxi	32	7	29.17	843	Dry	Satiety Weight Management Dry	2015-04-20	2	2015-05-04	1	1	-2	-3	2	-4.28571	829.167	83	66.06	6.613	-3	-8.57143	2	-4.28571
1851010	1525369	Argentina	female	neutered	2012-07-01	Maxi	31	7	29.17	843	Dry	Satiety Weight Management Dry	2015-04-20	3	2015-05-19	1	1	-2	-4	4.14286	-2.75862	829.167	83	66.06	6.613	-1	-2.85714	2.14286	-1.33333
1851010	1525369	Argentina	female	neutered	2012-07-01	Maxi	29	7	29.17	843	Dry	Satiety Weight Management Dry	2015-04-20	4	2015-06-18	1	1	-2	-6	8.42857	-2.0339	829.167	83	66.06	6.613	-2	-5.71429	4.28571	-1.33333
1851010	1525369	Argentina	female	neutered	2012-07-01	Maxi	29	7	29.17	843	Dry	Satiety Weight Management Dry	2015-04-20	5	2015-07-23	1	1	-2	-6	13.4286	-1.2766	829.167	83	66.06	6.613	0	0	5	0
1851012	1525369	Argentina	female	neutered	2010-05-07	Medium	25	8	20.83	590	Dry	Satiety Weight Management Dry	2015-04-20	1	2015-04-20	1	1	-2	0	0	#N/A	644.167	65	66.066	6.666	0	0	0
1851012	1525369	Argentina	female	neutered	2010-05-07	Medium	22	8	20.83	655	Dry	Satiety Weight Management Dry	2015-04-20	2	2015-05-04	1	1	-2	-3	2	-6	644.167	65	66.066	6.666	-3	-12	2	-6
1851012	1525369	Argentina	female	neutered	2010-05-07	Medium	22.5	8	20.83	655	Dry	Satiety Weight Management Dry	2015-04-20	3	2015-05-19	1	1	-3	-2.5	4.14286	-2.41379	644.167	65	66.066	6.666	0.5	2	2.14286	0.933333
1851012	1525369	Argentina	female	neutered	2010-05-07	Medium	21	8	20.83	655	Dry	Satiety Weight Management Dry	2015-04-20	4	2015-06-18	1	1	-3	-4	8.42857	-1.89831	644.167	65	66.066	6.666	-1.5	-6	4.28571	-1.4
1851012	1525369	Argentina	female	neutered	2010-05-07	Medium	20	8	20.83	655	Dry	Satiety Weight Management Dry	2015-04-20	5	2015-07-23	1	1	-3	-5	13.4286	-1.48936	644.167	65	66.066	6.666	-1	-4	5	-0.8
1851219	1244796	Italy	female	neutered	2010-04-14	Pastore Tedesco	38	8	29.23	886	Dry	Satiety Weight Management Dry	2015-04-14	1	2015-04-14	-1	0	-3	0	0	#N/A	655	-291	52.104	-23.148	0	0	0
1851219	1244796	Italy	female	neutered	2010-04-14	Pastore Tedesco	37.2	8	29.23	664	Dry	Satiety Weight Management Dry	2015-04-14	2	2015-04-29	0	0	-2	-0.8	2.14286	-0.982456	655	-291	52.104	-23.148	-0.8	-2.10526	2.14286	-0.982456
1851219	1244796	Italy	female	neutered	2010-04-14	Pastore Tedesco	36.3	8	29.23	595	Dry	Satiety Weight Management Dry	2015-04-14	3	2015-05-19	0	0	-2	-1.7	5	-0.894737	655	-291	52.104	-23.148	-0.9	-2.36842	2.85714	-0.828947
1851219	1244796	Italy	female	neutered	2010-04-14	Pastore Tedesco	34	8	29.23	595	Dry	Satiety Weight Management Dry	2015-04-14	4	2015-06-13	0	0	-2	-4	8.57143	-1.22807	655	-291	52.104	-23.148	-2.3	-6.05263	3.57143	-1.69474
1851219	1244796	Italy	female	neutered	2010-04-14	Pastore Tedesco	30	8	29.23	595	Dry	Satiety Weight Management Dry	2015-04-14	5	2015-07-16	0	1	-1	-8	13.2857	-1.58461	655	-291	52.104	-23.148	-4	-10.5263	4.71429	-2.23285
1851248	1229005	Italy	male	neutered	2004-04-14	Chihuahua	5.58	7	4.65	223	Dry	Satiety Small Dog	2015-04-14	1	2015-04-14	0	0	-2	0	0	#N/A	223	0	70.423	0	0	0	0
1851248	1229005	Italy	male	neutered	2004-04-14	Chihuahua	5.39	7	4.65	223	Dry	Satiety Small Dog	2015-04-14	2	2015-05-04	0	0	-1	-0.19	2.85714	-1.19176	223	0	70.423	0	-0.19	-3.40502	2.85714	-1.19176
1851248	1229005	Italy	male	neutered	2004-04-14	Chihuahua	4.95	7	4.65	223	Dry	Satiety Small Dog	2015-04-14	3	2015-05-26	0	1	-1	-0.63	6	-1.88172	223	0	70.423	0	-0.44	-7.8853	3.14286	-2.50896
1851248	1229005	Italy	male	neutered	2004-04-14	Chihuahua	4.85	7	4.65	223	Dry	Satiety Small Dog	2015-04-14	4	2015-06-18	0	1	0	-0.73	9.28571	-1.40888	223	0	70.423	0	-0.1	-1.79211	3.28571	-0.545426
1851248	1229005	Italy	male	neutered	2004-04-14	Chihuahua	4.65	7	4.65	223	Dry	Satiety Small Dog	2015-04-14	5	2015-07-09	0	1	-1	-0.93	12.2857	-1.35659	223	0	70.423	0	-0.2	-3.58423	3	-1.19474
1851565	1229843	Italy	female	intact	2011-04-30	MINI	11	8	7.86	285	Dry	Satiety Small Dog	2015-04-14	1	2015-04-14	-1	-1	-3	0	0	#N/A	285	0	60.712	0	0	0	0
1851565	1229843	Italy	female	intact	2011-04-30	MINI	10.3	8	7.86	285	Dry	Satiety Small Dog	2015-04-14	2	2015-04-30	0	0	-2	-0.7	2.28571	-2.78409	285	0	60.712	0	-0.7	-6.36364	2.28571	-2.78409
1851565	1229843	Italy	female	intact	2011-04-30	MINI	9.6	8	7.86	285	Dry	Satiety Small Dog	2015-04-14	3	2015-05-23	0	0	-1	-1.4	5.57143	-2.28438	285	0	60.712	0	-0.7	-6.36364	3.28571	-1.93676
1851565	1229843	Italy	female	intact	2011-04-30	MINI	9.23	8	7.86	285	Dry	Satiety Small Dog	2015-04-14	4	2015-06-17	0	1	0	-1.77	9.14286	-1.75994	285	0	60.712	0	-0.37	-3.36364	3.57143	-0.941818
1851565	1229843	Italy	female	intact	2011-04-30	MINI	8.4	8	7.86	285	Dry	Satiety Small Dog	2015-04-14	5	2015-07-13	1	1	0	-2.6	12.8571	-1.83838	285	0	60.712	0	-0.83	-7.54545	3.71429	-2.03147
1851571	1493699	Argentina	female	neutered	2010-09-05	Golden Retriever	45	7	34.62	864	Dry	Satiety Weight Management Dry	2015-04-14	1	2015-04-14	0	0	0	0	0	#N/A	725.167	-220	50.809	-15.414	0	0	0
1851571	1493699	Argentina	female	neutered	2010-09-05	Golden Retriever	44.5	7	34.62	785	Dry	Satiety Weight Management Dry	2015-04-14	2	2015-04-27	0	0	0	-0.5	1.85714	-0.598291	725.167	-220	50.809	-15.414	-0.5	-1.11111	1.85714	-0.598291
1851571	1493699	Argentina	female	neutered	2010-09-05	Golden Retriever	43.8	7	34.62	707	Dry	Satiety Weight Management Dry	2015-04-14	3	2015-05-08	0	0	0	-1.2	3.42857	-0.777778	725.167	-220	50.809	-15.414	-0.7	-1.55556	1.57143	-0.989899
1851571	1493699	Argentina	female	neutered	2010-09-05	Golden Retriever	42.1	7	34.62	644	Dry	Satiety Weight Management Dry	2015-04-14	4	2015-06-11	0	0	0	-2.9	8.28571	-0.777778	725.167	-220	50.809	-15.414	-1.7	-3.77778	4.85714	-0.777778
1851571	1493699	Argentina	female	neutered	2010-09-05	Golden Retriever	41.5	7	34.62	581	Dry	Satiety Weight Management Dry	2015-04-14	5	2015-07-10	0	0	0	-3.5	12.4286	-0.625798	725.167	-220	50.809	-15.414	-0.6	-1.33333	4.14286	-0.321839
1852474	1524435	Italy	male	neutered	2007-04-15	Welsh Corgi Pembroke	22	7	15.71	556	Dry	Satiety Weight Management Dry	2015-04-15	1	2015-04-15	-1	-1	-3	0	0	#N/A	556	0	70.46	0	0	0	0
1852474	1524435	Italy	male	neutered	2007-04-15	Welsh Corgi Pembroke	21.7	7	15.71	556	Dry	Satiety Weight Management Dry	2015-04-15	2	2015-04-29	0	1	-1	-0.3	2	-0.681818	556	0	70.46	0	-0.3	-1.36364	2	-0.681818
1852474	1524435	Italy	male	neutered	2007-04-15	Welsh Corgi Pembroke	20.7	7	15.71	556	Dry	Satiety Weight Management Dry	2015-04-15	3	2015-05-21	0	1	-1	-1.3	5.14286	-1.14899	556	0	70.46	0	-1	-4.54545	3.14286	-1.44628
1852474	1524435	Italy	male	neutered	2007-04-15	Welsh Corgi Pembroke	19.7	7	15.71	556	Dry	Satiety Weight Management Dry	2015-04-15	4	2015-06-22	0	1	-1	-2.3	9.71429	-1.0762	556	0	70.46	0	-1	-4.54545	4.57143	-0.994318
1852474	1524435	Italy	male	neutered	2007-04-15	Welsh Corgi Pembroke	18.7	7	15.71	556	Dry	Satiety Weight Management Dry	2015-04-15	5	2015-07-22	1	0	-1	-3.3	14	-1.07143	556	0	70.46	0	-1	-4.54545	4.28571	-1.06061
1852480	1510442	Portugal	female	neutered	2010-04-05	German Shepherd Dog	37.4	8	28.77	752	Dry	Satiety Weight Management Dry	2015-04-15	1	2015-04-15	0	1	-2	0	0	#N/A	752	0	60.536	0	0	0	0
1852480	1510442	Portugal	female	neutered	2010-04-05	German Shepherd Dog	35.75	8	28.77	752	Dry	Satiety Weight Management Dry	2015-04-15	2	2015-05-01	0	0	-2	-1.65	2.28571	-1.93015	752	0	60.536	0	-1.65	-4.41176	2.28571	-1.93015
1852480	1510442	Portugal	female	neutered	2010-04-05	German Shepherd Dog	35.3	8	28.77	752	Dry	Satiety Weight Management Dry	2015-04-15	3	2015-05-15	0	0	-2	-2.1	4.28571	-1.31016	752	0	60.536	0	-0.45	-1.20321	2	-0.601604
1852480	1510442	Portugal	female	neutered	2010-04-05	German Shepherd Dog	34.5	8	28.77	752	Dry	Satiety Weight Management Dry	2015-04-15	4	2015-05-29	0	0	-2	-2.9	6.28571	-1.23359	752	0	60.536	0	-0.8	-2.13904	2	-1.06952
1852480	1510442	Portugal	female	neutered	2010-04-05	German Shepherd Dog	32.6	8	28.77	752	Dry	Satiety Weight Management Dry	2015-04-15	5	2015-07-01	1	1	0	-4.8	11	-1.16675	752	0	60.536	0	-1.9	-5.08021	4.71429	-1.07762
1852704	1504877	USA	female	neutered	2010-01-30	Dachshund	6.50458	7	5.42048	215	Dry	Satiety Small Dog	2015-04-15	1	2015-04-15	0	1	-1	0	0	#N/A	195.667	-39	55.079	-10.978	0	0	0
1852704	1504877	USA	female	neutered	2010-01-30	Dachshund	6.28685	7	5.42048	215	Dry	Satiety Small Dog	2015-04-15	2	2015-05-04	1	0	-2	-0.217727	2.71429	-1.23321	195.667	-39	55.079	-10.978	-0.217727	-3.34728	2.71429	-1.23321
1852704	1504877	USA	female	neutered	2010-01-30	Dachshund	6.20521	7	5.42048	196	Dry	Satiety Small Dog	2015-04-15	3	2015-05-18	0	0	-2	-0.299374	4.71429	-0.97629	195.667	-39	55.079	-10.978	-0.0816475	-1.25523	2	-0.627615
1852704	1504877	USA	female	neutered	2010-01-30	Dachshund	6.17799	7	5.42048	176	Dry	Satiety Small Dog	2015-04-15	4	2015-06-08	0	0	-2	-0.32659	7.71429	-0.65086	195.667	-39	55.079	-10.978	-0.0272158	-0.41841	3	-0.13947
1852704	1504877	USA	female	neutered	2010-01-30	Dachshund	5.93305	7	5.42048	157	Dry	Satiety Small Dog	2015-04-15	5	2015-07-06	0	0	-2	-0.571532	11.7143	-0.750077	195.667	-39	55.079	-10.978	-0.244942	-3.76569	4	-0.941423
1852716	1525367	Canada	male	neutered	2010-09-11	Golden Retriever	38.73	7	32.28	954	Dry	Satiety Weight Management Dry	2015-04-15	1	2015-04-15	-1	1	-3	0	0	#N/A	954	0	70.445	0	0	0	0
1852716	1525367	Canada	male	neutered	2010-09-11	Golden Retriever	37.27	7	32.28	954	Dry	Satiety Weight Management Dry	2015-04-15	2	2015-05-04	0	0	0	-1.46	2.71429	-1.38883	954	0	70.445	0	-1.46	-3.76969	2.71429	-1.38883
1852716	1525367	Canada	male	neutered	2010-09-11	Golden Retriever	36.45	7	32.28	954	Dry	Satiety Weight Management Dry	2015-04-15	3	2015-05-20	1	1	-1	-2.28	5	-1.17738	954	0	70.445	0	-0.82	-2.11722	2.28571	-0.926285
1852716	1525367	Canada	male	neutered	2010-09-11	Golden Retriever	35.09	7	32.28	954	Dry	Satiety Weight Management Dry	2015-04-15	4	2015-06-03	0	0	-3	-3.64	7	-1.34263	954	0	70.445	0	-1.36	-3.51149	2	-1.75574
1852716	1525367	Canada	male	neutered	2010-09-11	Golden Retriever	34.8	7	32.28	865	Dry	Satiety Weight Management Dry	2015-04-15	5	2015-06-29	0	0	-2	-3.93	10.7143	-0.947069	954	0	70.445	0	-0.29	-0.748774	3.71429	-0.201593
1852726	1208308	Italy	female	neutered	2006-06-26	Epagneul Breton	17.5	9	12.5	403	Dry	Satiety Weight Management Dry	2015-04-15	1	2015-04-15	-1	0	-3	0	0	#N/A	356.667	-88	53.651	-13.237	0	0	0
1852726	1208308	Italy	female	neutered	2006-06-26	Epagneul Breton	17	9	12.5	403	Dry	Satiety Weight Management Dry	2015-04-15	2	2015-05-12	-1	-1	-2	-0.5	3.85714	-0.740741	356.667	-88	53.651	-13.237	-0.5	-2.85714	3.85714	-0.740741
1852726	1208308	Italy	female	neutered	2006-06-26	Epagneul Breton	15	9	12.5	352	Dry	Satiety Weight Management Dry	2015-04-15	3	2015-05-18	0	0	-1	-2.5	4.71429	-3.0303	356.667	-88	53.651	-13.237	-2	-11.4286	0.857143	-13.3333
1852726	1208308	Italy	female	neutered	2006-06-26	Epagneul Breton	14.2	9	12.5	315	Dry	Satiety Weight Management Dry	2015-04-15	4	2015-06-22	0	0	-1	-3.3	9.71429	-1.94118	356.667	-88	53.651	-13.237	-0.8	-4.57143	5	-0.914286
1852726	1208308	Italy	female	neutered	2006-06-26	Epagneul Breton	13.95	9	12.5	286	Dry	Satiety Weight Management Dry	2015-04-15	5	2015-07-20	0	0	-1	-3.55	13.7143	-1.47917	356.667	-88	53.651	-13.237	-0.25	-1.42857	4	-0.357143
1852880	767632	Netherlands	female	intact	2012-04-16	Newfoundlander	59	8	45.38	1231	Dry	Satiety Weight Management Dry	2015-04-16	1	2015-04-16	-1	1	-3	0	0	#N/A	1192.67	-115	68.214	-6.577	0	0	0
1852880	767632	Netherlands	female	intact	2012-04-16	Newfoundlander	56.1	8	45.38	1231	Dry	Satiety Weight Management Dry	2015-04-16	2	2015-05-02	-1	1	-2	-2.9	2.28571	-2.15042	1192.67	-115	68.214	-6.577	-2.9	-4.91525	2.28571	-2.15042
1852880	767632	Netherlands	female	intact	2012-04-16	Newfoundlander	53.5	8	45.38	1231	Dry	Satiety Weight Management Dry	2015-04-16	3	2015-05-23	0	1	-1	-5.5	5.28571	-1.76363	1192.67	-115	68.214	-6.577	-2.6	-4.40678	3	-1.46893
1852880	767632	Netherlands	female	intact	2012-04-16	Newfoundlander	54.6	8	45.38	1116	Dry	Satiety Weight Management Dry	2015-04-16	4	2015-06-13	0	0	-1	-4.4	8.28571	-0.900058	1192.67	-115	68.214	-6.577	1.1	1.86441	3	0.621469
1852880	767632	Netherlands	female	intact	2012-04-16	Newfoundlander	51.4	8	45.38	1116	Dry	Satiety Weight Management Dry	2015-04-16	5	2015-07-11	0	0	-1	-7.6	12.2857	-1.04848	1192.67	-115	68.214	-6.577	-3.2	-5.42373	4	-1.35593
1852917	1457988	Spain	female	intact	2007-02-14	Mini	7	7	5.83	265	Mix feeding	wet product : Satiety Weight Management HÃºmedo / dry product : Satiety Weight Management Dry	2015-04-16	1	2015-04-16	-1	-1	-2	0	0	#N/A	220.5	-71	58.77	-18.924	0	0	0
1852917	1457988	Spain	female	intact	2007-02-14	Mini	7	7	5.83	240	Mix feeding	wet product : Satiety Weight Management HÃºmedo / dry product : Satiety Small Dog	2015-04-16	2	2015-04-30	0	0	-2	0	2	0	220.5	-71	58.77	-18.924	0	0	2	0
1852917	1457988	Spain	female	intact	2007-02-14	Mini	6.8	7	5.83	215	Mix feeding	wet product : Satiety Weight Management HÃºmedo / dry product : Satiety Small Dog	2015-04-16	3	2015-05-14	0	-1	-1	-0.2	4	-0.714286	220.5	-71	58.77	-18.924	-0.2	-2.85714	2	-1.42857
1852917	1457988	Spain	female	intact	2007-02-14	Mini	6.76	7	5.83	194	Mix feeding	wet product : Satiety Weight Management HÃºmedo / dry product : Satiety Small Dog	2015-04-16	4	2015-06-11	0	0	-3	-0.24	8	-0.428571	220.5	-71	58.77	-18.924	-0.04	-0.571429	4	-0.142857
1852917	1457988	Spain	female	intact	2007-02-14	Mini	6.45	7	5.83	252	Mix feeding	wet product : Satiety Weight Management HÃºmedo / dry product : Satiety Small Dog	2015-04-16	5	2015-07-13	-1	1	-3	-0.55	12.5714	-0.625	220.5	-71	58.77	-18.924	-0.31	-4.42857	4.57143	-0.96875
1852978	1493735	Italy	male	intact	2006-04-30	Pinscher Nano	6.2	7	4.77	260	Dry	Satiety Small Dog	2015-04-16	1	2015-04-16	1	1	0	0	0	#N/A	255.833	0	79.263	0	0	0	0
1852978	1493735	Italy	male	intact	2006-04-30	Pinscher Nano	6.2	7	4.77	235	Dry	Satiety Small Dog	2015-04-16	2	2015-05-02	1	0	0	0	2.28571	0	255.833	0	79.263	0	0	0	2.28571	0
1852978	1493735	Italy	male	intact	2006-04-30	Pinscher Nano	5	7	4.77	260	Dry	Satiety Small Dog	2015-04-16	3	2015-05-23	1	1	-1	-1.2	5.28571	-3.66173	255.833	0	79.263	0	-1.2	-19.3548	3	-6.45161
1852978	1493735	Italy	male	intact	2006-04-30	Pinscher Nano	5	7	4.77	260	Dry	Satiety Small Dog	2015-04-16	4	2015-06-09	0	0	0	-1.2	7.71429	-2.50896	255.833	0	79.263	0	0	0	2.42857	0
1852978	1493735	Italy	male	intact	2006-04-30	Pinscher Nano	4.9	7	4.77	260	Dry	Satiety Small Dog	2015-04-16	5	2015-07-13	1	1	0	-1.3	12.5714	-1.66789	255.833	0	79.263	0	-0.1	-1.6129	4.85714	-0.332068
1853029	1457988	Spain	female	intact	2013-11-24	Labrador Retriever	32.5	8	27.08	836	Dry	Satiety Weight Management Dry	2015-04-16	1	2015-04-16	0	0	-2	0	0	#N/A	836	0	70.424	0	0	0	0
1853029	1457988	Spain	female	intact	2013-11-24	Labrador Retriever	31.6	8	27.08	836	Dry	Satiety Weight Management Dry	2015-04-16	2	2015-04-30	1	1	-1	-0.9	2	-1.38462	836	0	70.424	0	-0.9	-2.76923	2	-1.38462
1853029	1457988	Spain	female	intact	2013-11-24	Labrador Retriever	31	8	27.08	836	Dry	Satiety Weight Management Dry	2015-04-16	3	2015-05-14	1	1	0	-1.5	4	-1.15385	836	0	70.424	0	-0.6	-1.84615	2	-0.923077
1853029	1457988	Spain	female	intact	2013-11-24	Labrador Retriever	29.3	8	27.08	836	Dry	Satiety Weight Management Dry	2015-04-16	4	2015-06-15	1	1	0	-3.2	8.57143	-1.14872	836	0	70.424	0	-1.7	-5.23077	4.57143	-1.14423
1853029	1457988	Spain	female	intact	2013-11-24	Labrador Retriever	28.9	8	27.08	758	Dry	Satiety Weight Management Dry	2015-04-16	5	2015-07-22	0	0	0	-3.6	13.8571	-0.799366	836	0	70.424	0	-0.4	-1.23077	5.28571	-0.232848
1853218	1510430	Germany	male	intact	2010-12-24	Labrador	41.5	7	35	1156	Mix feeding	wet product : Satiety Weight Management Canine / dry product : Satiety Weight Management Dry	2015-04-16	1	2015-04-16	0	0	-1	0	0	#N/A	1248.5	111	86.764	7.714	0	0	0
1853218	1510430	Germany	male	intact	2010-12-24	Labrador	37.85	7	35	1267	Mix feeding	wet product : Satiety Weight Management Canine / dry product : Satiety Weight Management Dry	2015-04-16	2	2015-05-05	0	0	-1	-3.65	2.71429	-3.24033	1248.5	111	86.764	7.714	-3.65	-8.79518	2.71429	-3.24033
1853218	1510430	Germany	male	intact	2010-12-24	Labrador	36.8	7	35	1267	Mix feeding	wet product : Satiety Weight Management Canine / dry product : Satiety Weight Management Dry	2015-04-16	3	2015-05-28	0	0	-1	-4.7	6	-1.88755	1248.5	111	86.764	7.714	-1.05	-2.53012	3.28571	-0.770037
1853218	1510430	Germany	male	intact	2010-12-24	Labrador	35.5	7	35	1267	Mix feeding	wet product : Satiety Weight Management Canine / dry product : Satiety Weight Management Dry	2015-04-16	4	2015-06-25	1	0	-1	-6	10	-1.44578	1248.5	111	86.764	7.714	-1.3	-3.13253	4	-0.783133
1853218	1510430	Germany	male	intact	2010-12-24	Labrador	35	7	35	1267	Mix feeding	wet product : Satiety Weight Management Canine / dry product : Satiety Weight Management Dry	2015-04-16	5	2015-07-20	1	0	-1	-6.5	13.5714	-1.15409	1248.5	111	86.764	7.714	-0.5	-1.20482	3.57143	-0.337349
1853249	1229005	Italy	female	neutered	2008-04-16	Beagle	14	7	11.67	382	Dry	Satiety Weight Management Dry	2015-04-16	1	2015-04-16	0	0	-2	0	0	#N/A	382	0	60.501	0	0	0	0
1853249	1229005	Italy	female	neutered	2008-04-16	Beagle	13.6	7	11.67	382	Dry	Satiety Weight Management Dry	2015-04-16	2	2015-05-05	0	0	-1	-0.4	2.71429	-1.05263	382	0	60.501	0	-0.4	-2.85714	2.71429	-1.05263
1853249	1229005	Italy	female	neutered	2008-04-16	Beagle	13	7	11.67	382	Dry	Satiety Weight Management Dry	2015-04-16	3	2015-05-26	0	0	-1	-1	5.71429	-1.25	382	0	60.501	0	-0.6	-4.28571	3	-1.42857
1853249	1229005	Italy	female	neutered	2008-04-16	Beagle	12.7	7	11.67	382	Dry	Satiety Weight Management Dry	2015-04-16	4	2015-06-18	0	0	-1	-1.3	9	-1.03175	382	0	60.501	0	-0.3	-2.14286	3.28571	-0.652174
1853249	1229005	Italy	female	neutered	2008-04-16	Beagle	12	7	11.67	382	Dry	Satiety Weight Management Dry	2015-04-16	5	2015-07-09	0	0	-1	-2	12	-1.19048	382	0	60.501	0	-0.7	-5	3	-1.66667
1853530	1522584	Spain	female	neutered	2012-01-01	Medium	18.2	8	14	438	Mix feeding	wet product : Satiety Weight Management HÃºmedo / dry product : Satiety Weight Management Dry	2015-04-16	1	2015-04-16	0	0	-3	0	0	#N/A	398.833	-47	55.106	-6.494	0	0	0
1853530	1522584	Spain	female	neutered	2012-01-01	Medium	18	8	14	391	Mix feeding	wet product : Satiety Weight Management HÃºmedo / dry product : Satiety Weight Management Dry	2015-04-16	2	2015-04-30	0	-1	-2	-0.2	2	-0.549451	398.833	-47	55.106	-6.494	-0.2	-1.0989	2	-0.549451
1853530	1522584	Spain	female	neutered	2012-01-01	Medium	17	8	14	391	Mix feeding	wet product : Satiety Weight Management HÃºmedo / dry product : Satiety Weight Management Dry	2015-04-16	3	2015-05-18	-1	0	0	-1.2	4.57143	-1.44231	398.833	-47	55.106	-6.494	-1	-5.49451	2.57143	-2.13675
1853530	1522584	Spain	female	neutered	2012-01-01	Medium	16.35	8	14	391	Mix feeding	wet product : Satiety Weight Management HÃºmedo / dry product : Satiety Weight Management Dry	2015-04-16	4	2015-06-16	0	0	0	-1.85	8.71429	-1.16646	398.833	-47	55.106	-6.494	-0.65	-3.57143	4.14286	-0.862069
1853530	1522584	Spain	female	neutered	2012-01-01	Medium	15.8	8	14	351	Mix feeding	wet product : Satiety Weight Management HÃºmedo / dry product : Satiety Weight Management Dry	2015-04-16	5	2015-07-20	0	0	0	-2.4	13.5714	-0.97166	398.833	-47	55.106	-6.494	-0.55	-3.02198	4.85714	-0.622172
1853695	1504832	France	male	neutered	2010-11-30	Golden Retriever	41	8	34	992	Dry	Satiety Weight Management Dry	2015-04-17	1	2015-04-17	0	1	-3	0	0	#N/A	992	0	70.453	0	0	0	0
1853695	1504832	France	male	neutered	2010-11-30	Golden Retriever	40.9	8	34	992	Dry	Satiety Weight Management Dry	2015-04-17	2	2015-04-30	0	0	-2	-0.1	1.85714	-0.131332	992	0	70.453	0	-0.1	-0.243902	1.85714	-0.131332
1853695	1504832	France	male	neutered	2010-11-30	Golden Retriever	40.25	8	34	992	Dry	Satiety Weight Management Dry	2015-04-17	3	2015-05-16	0	0	-1	-0.75	4.14286	-0.441548	992	0	70.453	0	-0.65	-1.58537	2.28571	-0.693598
1853695	1504832	France	male	neutered	2010-11-30	Golden Retriever	38.7	8	34	992	Dry	Satiety Weight Management Dry	2015-04-17	4	2015-06-26	0	0	-1	-2.3	10	-0.560976	992	0	70.453	0	-1.55	-3.78049	5.85714	-0.645449
1853695	1504832	France	male	neutered	2010-11-30	Golden Retriever	38	8	34	992	Dry	Satiety Weight Management Dry	2015-04-17	5	2015-07-15	0	1	-1	-3	12.7143	-0.5755	992	0	70.453	0	-0.7	-1.70732	2.71429	-0.629012
1853836	1205959	Italy	male	intact	2011-04-17	Maxi	64	8	45.71	1412	Dry	Satiety Weight Management Dry	2015-04-17	1	2015-04-17	-1	-1	-2	0	0	#N/A	1150.83	-445	65.464	-25.313	0	0	0
1853836	1205959	Italy	male	intact	2011-04-17	Maxi	63	8	45.71	1277	Dry	Satiety Weight Management Dry	2015-04-17	2	2015-05-07	0	0	-2	-1	2.85714	-0.546875	1150.83	-445	65.464	-25.313	-1	-1.5625	2.85714	-0.546875
1853836	1205959	Italy	male	intact	2011-04-17	Maxi	62.3	8	45.71	1141	Dry	Satiety Weight Management Dry	2015-04-17	3	2015-05-25	0	1	-2	-1.7	5.42857	-0.489309	1150.83	-445	65.464	-25.313	-0.7	-1.09375	2.57143	-0.425347
1853836	1205959	Italy	male	intact	2011-04-17	Maxi	62.1	8	45.71	967	Dry	Satiety Weight Management Dry	2015-04-17	4	2015-06-25	0	1	-1	-1.9	9.85714	-0.301178	1150.83	-445	65.464	-25.313	-0.2	-0.3125	4.42857	-0.0705645
1853836	1205959	Italy	male	intact	2011-04-17	Maxi	62	8	45.71	871	Dry	Satiety Weight Management Dry	2015-04-17	5	2015-07-16	0	1	-1	-2	12.8571	-0.243056	1150.83	-445	65.464	-25.313	-0.1	-0.15625	3	-0.0520833
1853888	1535723	Germany	female	neutered	2003-11-01	Labrador Retriever	51	8	36.43	898	Mix feeding	wet product : Satiety Weight Management Canine / dry product : Satiety Weight Management Dry	2015-04-17	1	2015-04-17	-1	-1	-3	0	0	#N/A	753.667	-229	50.826	-15.443	0	0	0
1853888	1535723	Germany	female	neutered	2003-11-01	Labrador Retriever	50.6	8	36.43	816	Mix feeding	wet product : Satiety Weight Management Canine / dry product : Satiety Weight Management Dry	2015-04-17	2	2015-05-02	-1	-1	-1	-0.4	2.14286	-0.366013	753.667	-229	50.826	-15.443	-0.4	-0.784314	2.14286	-0.366013
1853888	1535723	Germany	female	neutered	2003-11-01	Labrador Retriever	49.2	8	36.43	735	Mix feeding	wet product : Satiety Weight Management Canine / dry product : Satiety Weight Management Dry	2015-04-17	3	2015-05-15	-1	-1	0	-1.8	4	-0.882353	753.667	-229	50.826	-15.443	-1.4	-2.7451	1.85714	-1.47813
1853888	1535723	Germany	female	neutered	2003-11-01	Labrador Retriever	48.2	8	36.43	669	Mix feeding	wet product : Satiety Weight Management Canine / dry product : Satiety Weight Management Dry	2015-04-17	4	2015-05-29	-1	-1	-1	-2.8	6	-0.915033	753.667	-229	50.826	-15.443	-1	-1.96078	2	-0.980392
1853888	1535723	Germany	female	neutered	2003-11-01	Labrador Retriever	45.3	8	36.43	604	Mix feeding	wet product : Satiety Weight Management Canine / dry product : Satiety Weight Management Dry	2015-04-17	5	2015-07-22	-1	-1	-1	-5.7	13.7143	-0.814951	753.667	-229	50.826	-15.443	-2.9	-5.68627	7.71429	-0.73711
1854095	1433323	Italy	female	neutered	2012-11-10	X-SMALL	5.3	9	4.3	253	Mix feeding	wet product : Satiety Weight Management Canine / dry product : Satiety Small Dog	2015-04-17	1	2015-04-17	0	0	-1	0	0	#N/A	228	-49	76.354	-16.409	0	0	0
1854095	1433323	Italy	female	neutered	2012-11-10	X-SMALL	5.1	9	4.3	253	Mix feeding	wet product : Satiety Weight Management Canine / dry product : Satiety Small Dog	2015-04-17	2	2015-05-08	0	0	0	-0.2	3	-1.25786	228	-49	76.354	-16.409	-0.2	-3.77358	3	-1.25786
1854095	1433323	Italy	female	neutered	2012-11-10	X-SMALL	5.1	9	4.3	227	Mix feeding	wet product : Satiety Weight Management Canine / dry product : Satiety Small Dog	2015-04-17	3	2015-05-25	0	0	0	-0.2	5.42857	-0.695134	228	-49	76.354	-16.409	0	0	2.42857	0
1854095	1433323	Italy	female	neutered	2012-11-10	X-SMALL	4.9	9	4.3	204	Dry	Satiety Small Dog	2015-04-17	4	2015-06-19	0	1	0	-0.4	9	-0.838574	228	-49	76.354	-16.409	-0.2	-3.77358	3.57143	-1.0566
1854095	1433323	Italy	female	neutered	2012-11-10	X-SMALL	4.9	9	4.3	184	Dry	Satiety Small Dog	2015-04-17	5	2015-07-24	0	#N/A	#N/A	-0.4	14	-0.539084	228	-49	76.354	-16.409	0	0	5	0
1854295	1244796	Italy	female	neutered	2013-03-03	Medium	30	9	23.08	638	Dry	Satiety Weight Management Dry	2015-04-18	1	2015-04-18	-1	0	-3	0	0	#N/A	638	0	60.589	0	0	0	0
1854295	1244796	Italy	female	neutered	2013-03-03	Medium	29	9	23.08	638	Dry	Satiety Weight Management Dry	2015-04-18	2	2015-05-04	-1	0	-3	-1	2.28571	-1.45833	638	0	60.589	0	-1	-3.33333	2.28571	-1.45833
1854295	1244796	Italy	female	neutered	2013-03-03	Medium	27.8	9	23.08	638	Dry	Satiety Weight Management Dry	2015-04-18	3	2015-05-19	0	0	-2	-2.2	4.42857	-1.65591	638	0	60.589	0	-1.2	-4	2.14286	-1.86667
1854295	1244796	Italy	female	neutered	2013-03-03	Medium	26	9	23.08	638	Dry	Satiety Weight Management Dry	2015-04-18	4	2015-06-13	0	1	-2	-4	8	-1.66667	638	0	60.589	0	-1.8	-6	3.57143	-1.68
1854295	1244796	Italy	female	neutered	2013-03-03	Medium	24.5	9	23.08	638	Dry	Satiety Weight Management Dry	2015-04-18	5	2015-07-16	1	1	-1	-5.5	12.7143	-1.44195	638	0	60.589	0	-1.5	-5	4.71429	-1.06061
1854315	1534063	Brazil	female	neutered	2006-01-21	West Highland White Terrier	9.45	7	7.27	268	Dry	Satiety Weight Management Dry	2015-04-17	1	2015-04-17	1	1	0	0	0	#N/A	268	0	60.532	0	0	0	0
1854315	1534063	Brazil	female	neutered	2006-01-21	West Highland White Terrier	9.05	7	7.27	268	Dry	Satiety Weight Management Dry	2015-04-17	2	2015-05-01	1	0	0	-0.4	2	-2.1164	268	0	60.532	0	-0.4	-4.2328	2	-2.1164
1854315	1534063	Brazil	female	neutered	2006-01-21	West Highland White Terrier	8.65	7	7.27	268	Dry	Satiety Weight Management Dry	2015-04-17	3	2015-05-18	1	0	0	-0.8	4.42857	-1.91159	268	0	60.532	0	-0.4	-4.2328	2.42857	-1.74292
1854315	1534063	Brazil	female	neutered	2006-01-21	West Highland White Terrier	8.5	7	7.27	268	Dry	Satiety Weight Management Dry	2015-04-17	4	2015-06-19	1	0	-1	-0.95	9	-1.11699	268	0	60.532	0	-0.15	-1.5873	4.57143	-0.347222
1854315	1534063	Brazil	female	neutered	2006-01-21	West Highland White Terrier	7.75	7	7.27	268	Dry	Satiety Weight Management Dry	2015-04-17	5	2015-07-20	1	0	-1	-1.7	13.4286	-1.33964	268	0	60.532	0	-0.75	-7.93651	4.42857	-1.79211
1855058	1523110	Italy	female	neutered	2010-04-17	Medium	17.5	8	12.5	403	Mix feeding	wet product : Satiety Weight Management Canine / dry product : Satiety Weight Management Dry	2015-04-17	1	2015-04-17	-1	-1	-2	0	0	#N/A	403	0	60.621	0	0	0	0
1855058	1523110	Italy	female	neutered	2010-04-17	Medium	16.6	8	12.5	403	Mix feeding	wet product : Obesity Management Wet / dry product : Satiety Weight Management Dry	2015-04-17	2	2015-05-04	-1	-1	-2	-0.9	2.42857	-2.11765	403	0	60.621	0	-0.9	-5.14286	2.42857	-2.11765
1855058	1523110	Italy	female	neutered	2010-04-17	Medium	16.05	8	12.5	403	Mix feeding	wet product : Obesity Management Wet / dry product : Satiety Small Dog	2015-04-17	3	2015-05-18	0	0	-1	-1.45	4.42857	-1.87097	403	0	60.621	0	-0.55	-3.14286	2	-1.57143
1855058	1523110	Italy	female	neutered	2010-04-17	Medium	15	8	12.5	403	Mix feeding	wet product : Obesity Management Wet / dry product : Satiety Small Dog	2015-04-17	4	2015-06-15	-1	0	-1	-2.5	8.42857	-1.69492	403	0	60.621	0	-1.05	-6	4	-1.5
1855058	1523110	Italy	female	neutered	2010-04-17	Medium	13	8	12.5	403	Mix feeding	wet product : Satiety Weight Management Canine / dry product : Satiety Weight Management Dry	2015-04-17	5	2015-07-22	1	0	0	-4.5	13.7143	-1.875	403	0	60.621	0	-2	-11.4286	5.28571	-2.16216
1855264	1516936	Canada	male	neutered	2008-04-17	Labrador Retriever	55.8	7	42.92	1181	Dry	Satiety Weight Management Dry	2015-04-17	1	2015-04-17	-1	1	-2	0	0	#N/A	965.667	-277	57.588	-16.519	0	0	0
1855264	1516936	Canada	male	neutered	2008-04-17	Labrador Retriever	55.4	7	42.92	997	Dry	Satiety Weight Management Dry	2015-04-17	2	2015-05-01	0	1	-1	-0.4	2	-0.358423	965.667	-277	57.588	-16.519	-0.4	-0.716846	2	-0.358423
1855264	1516936	Canada	male	neutered	2008-04-17	Labrador Retriever	54.4	7	42.92	904	Dry	Satiety Weight Management Dry	2015-04-17	3	2015-05-21	0	1	-1	-1.4	4.85714	-0.516551	965.667	-277	57.588	-16.519	-1	-1.79211	2.85714	-0.62724
1855264	1516936	Canada	male	neutered	2008-04-17	Labrador Retriever	52.1	7	42.92	904	Dry	Satiety Weight Management Dry	2015-04-17	4	2015-06-12	0	1	-1	-3.7	8	-0.828853	965.667	-277	57.588	-16.519	-2.3	-4.12186	3.14286	-1.3115
1855264	1516936	Canada	male	neutered	2008-04-17	Labrador Retriever	50	7	42.92	812	Dry	Satiety Weight Management Dry	2015-04-17	5	2015-07-17	1	1	-1	-5.8	13	-0.799559	965.667	-277	57.588	-16.519	-2.1	-3.76344	5	-0.752688
1855353	1210372	Italy	female	neutered	2011-04-18	Bovaro Bernese	51.8	8	43	1016	Dry	Satiety Weight Management Dry	2015-04-18	1	2015-04-18	0	0	-1	0	0	#N/A	837.667	-277	49.885	-16.496	0	0	0
1855353	1210372	Italy	female	neutered	2011-04-18	Bovaro Bernese	53	8	43	906	Dry	Satiety Weight Management Dry	2015-04-18	2	2015-05-04	1	0	-1	1.2	2.28571	1.01351	837.667	-277	49.885	-16.496	1.2	2.3166	2.28571	1.01351
1855353	1210372	Italy	female	neutered	2011-04-18	Bovaro Bernese	50.9	8	43	813	Dry	Satiety Weight Management Dry	2015-04-18	3	2015-05-15	1	1	0	-0.9	3.85714	-0.45045	837.667	-277	49.885	-16.496	-2.1	-4.05405	1.57143	-2.57985
1855353	1210372	Italy	female	neutered	2011-04-18	Bovaro Bernese	48.4	8	43	739	Dry	Satiety Weight Management Dry	2015-04-18	4	2015-06-19	1	1	0	-3.4	8.85714	-0.741064	837.667	-277	49.885	-16.496	-2.5	-4.82625	5	-0.965251
1855353	1210372	Italy	female	neutered	2011-04-18	Bovaro Bernese	45.8	8	43	665	Dry	Satiety Weight Management Dry	2015-04-18	5	2015-07-24	0	1	0	-6	13.8571	-0.835887	837.667	-277	49.885	-16.496	-2.6	-5.01931	5	-1.00386
1855396	1508576	Portugal	female	intact	2006-04-17	Medium	19	8	15.83	559	Dry	Satiety Weight Management Dry	2015-04-18	1	2015-04-18	0	0	-2	0	0	#N/A	506.667	-105	63.843	-13.231	0	0	0
1855396	1508576	Portugal	female	intact	2006-04-17	Medium	18.55	8	15.83	559	Dry	Satiety Weight Management Dry	2015-04-18	2	2015-05-02	0	0	-2	-0.45	2	-1.18421	506.667	-105	63.843	-13.231	-0.45	-2.36842	2	-1.18421
1855396	1508576	Portugal	female	intact	2006-04-17	Medium	18.35	8	15.83	507	Dry	Satiety Weight Management Dry	2015-04-18	3	2015-05-19	0	0	-2	-0.65	4.42857	-0.772496	506.667	-105	63.843	-13.231	-0.2	-1.05263	2.42857	-0.433437
1855396	1508576	Portugal	female	intact	2006-04-17	Medium	17.35	8	15.83	454	Dry	Satiety Weight Management Dry	2015-04-18	4	2015-06-18	0	0	-2	-1.65	8.71429	-0.996549	506.667	-105	63.843	-13.231	-1	-5.26316	4.28571	-1.22807
1855396	1508576	Portugal	female	intact	2006-04-17	Medium	16.5	8	15.83	454	Dry	Satiety Weight Management Dry	2015-04-18	5	2015-07-16	0	0	-1	-2.5	12.7143	-1.03489	506.667	-105	63.843	-13.231	-0.85	-4.47368	4	-1.11842
1855544	1534063	Brazil	female	neutered	2011-04-18	Golden Retriever	41	8	31.54	806	Dry	Satiety Weight Management Dry	2015-04-18	1	2015-04-18	0	0	0	0	0	#N/A	806	0	60.56	0	0	0	0
1855544	1534063	Brazil	female	neutered	2011-04-18	Golden Retriever	40	8	31.54	806	Dry	Satiety Weight Management Dry	2015-04-18	2	2015-05-02	0	0	0	-1	2	-1.21951	806	0	60.56	0	-1	-2.43902	2	-1.21951
1855544	1534063	Brazil	female	neutered	2011-04-18	Golden Retriever	39	8	31.54	806	Dry	Satiety Weight Management Dry	2015-04-18	3	2015-05-18	1	0	0	-2	4.28571	-1.13821	806	0	60.56	0	-1	-2.43902	2.28571	-1.06707
1855544	1534063	Brazil	female	neutered	2011-04-18	Golden Retriever	37.3	8	31.54	806	Dry	Satiety Weight Management Dry	2015-04-18	4	2015-06-19	1	1	0	-3.7	8.85714	-1.01888	806	0	60.56	0	-1.7	-4.14634	4.57143	-0.907012
1855544	1534063	Brazil	female	neutered	2011-04-18	Golden Retriever	36.5	8	31.54	732	Dry	Satiety Weight Management Dry	2015-04-18	5	2015-07-18	1	1	0	-4.5	13	-0.844278	806	0	60.56	0	-0.8	-1.95122	4.14286	-0.470984
1855551	1236204	Italy	female	neutered	2013-09-10	X-SMALL	16.53	7	13.78	433	Mix feeding	wet product : Satiety Weight Management Canine / dry product : Satiety Weight Management Dry	2015-04-18	1	2015-04-18	1	1	-1	0	0	#N/A	420	-39	58.724	-5.453	0	0	0
1855551	1236204	Italy	female	neutered	2013-09-10	X-SMALL	15.83	7	13.78	433	Mix feeding	wet product : Satiety Weight Management Canine / dry product : Satiety Weight Management Dry	2015-04-18	2	2015-05-04	1	1	-1	-0.7	2.28571	-1.85269	420	-39	58.724	-5.453	-0.7	-4.23472	2.28571	-1.85269
1855551	1236204	Italy	female	neutered	2013-09-10	X-SMALL	15.66	7	13.78	433	Mix feeding	wet product : Satiety Weight Management Canine / dry product : Satiety Weight Management Dry	2015-04-18	3	2015-05-18	1	1	-1	-0.87	4.28571	-1.22807	420	-39	58.724	-5.453	-0.17	-1.02843	2	-0.514217
1855551	1236204	Italy	female	neutered	2013-09-10	X-SMALL	15.39	7	13.78	394	Mix feeding	wet product : Satiety Weight Management Canine / dry product : Satiety Weight Management Dry	2015-04-18	4	2015-06-17	0	1	-1	-1.14	8.57143	-0.804598	420	-39	58.724	-5.453	-0.27	-1.63339	4.28571	-0.381125
1855551	1236204	Italy	female	neutered	2013-09-10	X-SMALL	14.8	7	13.78	355	Mix feeding	wet product : Satiety Weight Management Canine / dry product : Satiety Small Dog	2015-04-18	5	2015-07-20	1	1	-1	-1.73	13.2857	-0.78775	420	-39	58.724	-5.453	-0.59	-3.56927	4.71429	-0.757117
1855695	1501881	Portugal	female	neutered	2013-01-13	Shiba Inu	12	8	10	341	Dry	Satiety Weight Management Dry	2015-04-18	1	2015-04-18	0	-1	-1	0	0	#N/A	286.167	-87	50.888	-15.471	0	0	0
1855695	1501881	Portugal	female	neutered	2013-01-13	Shiba Inu	11.9	8	10	310	Mix feeding	wet product : Satiety Weight Management Canine / dry product : Satiety Weight Management Dry	2015-04-18	2	2015-05-04	0	1	-1	-0.1	2.28571	-0.364583	286.167	-87	50.888	-15.471	-0.1	-0.833333	2.28571	-0.364583
1855695	1501881	Portugal	female	neutered	2013-01-13	Shiba Inu	11.7	8	10	279	Mix feeding	wet product : Satiety Weight Management Canine / dry product : Satiety Weight Management Dry	2015-04-18	3	2015-05-18	0	1	-1	-0.3	4.28571	-0.583333	286.167	-87	50.888	-15.471	-0.2	-1.66667	2	-0.833333
1855695	1501881	Portugal	female	neutered	2013-01-13	Shiba Inu	11.45	8	10	254	Mix feeding	wet product : Satiety Weight Management Canine / dry product : Satiety Weight Management Dry	2015-04-18	4	2015-06-03	1	1	-1	-0.55	6.57143	-0.697464	286.167	-87	50.888	-15.471	-0.25	-2.08333	2.28571	-0.911458
1855695	1501881	Portugal	female	neutered	2013-01-13	Shiba Inu	10.8	8	10	229	Mix feeding	wet product : Satiety Weight Management Canine / dry product : Satiety Weight Management Dry	2015-04-18	5	2015-07-20	0	1	-1	-1.2	13.2857	-0.752688	286.167	-87	50.888	-15.471	-0.65	-5.41667	6.71429	-0.806738
1855703	1534063	Brazil	male	neutered	2012-03-01	German Spitz	12.7	7	9.07	368	Dry	Satiety Weight Management Dry	2015-04-18	1	2015-04-18	1	1	0	0	0	#N/A	307	-97	58.74	-18.559	0	0	0
1855703	1534063	Brazil	male	neutered	2012-03-01	German Spitz	12.6	7	9.07	334	Dry	Satiety Weight Management Dry	2015-04-18	2	2015-05-02	1	0	0	-0.1	2	-0.393701	307	-97	58.74	-18.559	-0.1	-0.787402	2	-0.393701
1855703	1534063	Brazil	male	neutered	2012-03-01	German Spitz	12.5	7	9.07	299	Dry	Satiety Weight Management Dry	2015-04-18	3	2015-05-18	1	0	0	-0.2	4.28571	-0.367454	307	-97	58.74	-18.559	-0.1	-0.787402	2.28571	-0.344488
1855703	1534063	Brazil	male	neutered	2012-03-01	German Spitz	12.5	7	9.07	271	Dry	Satiety Weight Management Dry	2015-04-18	4	2015-06-19	1	0	0	-0.2	8.85714	-0.1778	307	-97	58.74	-18.559	0	0	4.57143	0
1855703	1534063	Brazil	male	neutered	2012-03-01	German Spitz	12.6	7	9.07	242	Dry	Satiety Weight Management Dry	2015-04-18	5	2015-07-21	1	0	0	-0.1	13.4286	-0.0586363	307	-97	58.74	-18.559	0.1	0.787402	4.57143	0.172244
1855719	1508576	Portugal	male	intact	2012-04-16	English Bulldog	26.25	7	21.88	813	Dry	Satiety Weight Management Dry	2015-04-18	1	2015-04-18	0	1	-3	0	0	#N/A	735	-156	72.653	-15.42	0	0	0
1855719	1508576	Portugal	male	intact	2012-04-16	English Bulldog	24.5	7	21.88	813	Dry	Satiety Weight Management Dry	2015-04-18	2	2015-05-04	0	0	-1	-1.75	2.28571	-2.91667	735	-156	72.653	-15.42	-1.75	-6.66667	2.28571	-2.91667
1855719	1508576	Portugal	male	intact	2012-04-16	English Bulldog	25.3	7	21.88	735	Dry	Satiety Weight Management Dry	2015-04-18	3	2015-05-23	0	-1	0	-0.95	5	-0.72381	735	-156	72.653	-15.42	0.8	3.04762	2.71429	1.12281
1855719	1508576	Portugal	male	intact	2012-04-16	English Bulldog	25.3	7	21.88	657	Dry	Satiety Weight Management Dry	2015-04-18	4	2015-06-16	0	0	-1	-0.95	8.42857	-0.429379	735	-156	72.653	-15.42	0	0	3.42857	0
1855719	1508576	Portugal	male	intact	2012-04-16	English Bulldog	23.75	7	21.88	590	Dry	Satiety Weight Management Dry	2015-04-18	5	2015-07-21	0	0	-1	-2.5	13.4286	-0.70922	735	-156	72.653	-15.42	-1.55	-5.90476	5	-1.18095
1855824	1525361	Germany	female	intact	2008-04-19	X-SMALL	18.6	8	15.5	550	Mix feeding	wet product : <font><font>Satiety Weight Management Canine</font></font> / dry product : Satiety Weight Management Dry	2015-04-19	1	2015-04-19	0	0	-1	0	0	#N/A	528	-51	67.59	-6.529	0	0	0
1855824	1525361	Germany	female	intact	2008-04-19	X-SMALL	18.1	8	15.5	550	Mix feeding	wet product : <font><font>Sattheit Weight Management Canine</font></font> / dry product : Satiety Weight Management Dry	2015-04-19	2	2015-04-29	1	0	-1	-0.5	1.42857	-1.88172	528	-51	67.59	-6.529	-0.5	-2.68817	1.42857	-1.88172
1855824	1525361	Germany	female	intact	2008-04-19	X-SMALL	17.8	8	15.5	535	Mix feeding	wet product : <font><font>Sattheit Weight Management Canine</font></font> / dry product : Satiety Weight Management Dry	2015-04-19	3	2015-05-09	0	0	-2	-0.8	2.85714	-1.50538	528	-51	67.59	-6.529	-0.3	-1.6129	1.42857	-1.12903
1855824	1525361	Germany	female	intact	2008-04-19	X-SMALL	17.4	8	15.5	499	Dry	Satiety Weight Management Dry	2015-04-19	4	2015-06-10	0	1	-1	-1.2	7.42857	-0.868486	528	-51	67.59	-6.529	-0.4	-2.15054	4.57143	-0.47043
1855824	1525361	Germany	female	intact	2008-04-19	X-SMALL	17	8	15.5	447	Mix feeding	wet product : <font><font class="">Sí?ttigungsgefí?hl Weight Management Canine</font></font> / dry product : Satiety Weight Management Dry	2015-04-19	5	2015-07-24	0	0	-1	-1.6	13.7143	-0.62724	528	-51	67.59	-6.529	-0.4	-2.15054	6.28571	-0.342131
1856380	1457988	Spain	female	neutered	2010-04-05	Golden Retriever	39.4	9	30.31	782	Dry	Satiety Weight Management Dry	2015-04-20	1	2015-04-20	-1	-1	-2	0	0	#N/A	711	-142	55.04	-10.993	0	0	0
1856380	1457988	Spain	female	neutered	2010-04-05	Golden Retriever	38.5	9	30.31	782	Dry	Satiety Weight Management Dry	2015-04-20	2	2015-05-04	0	0	-2	-0.9	2	-1.14213	711	-142	55.04	-10.993	-0.9	-2.28426	2	-1.14213
1856380	1457988	Spain	female	neutered	2010-04-05	Golden Retriever	38.1	9	30.31	711	Dry	Satiety Weight Management Dry	2015-04-20	3	2015-05-19	0	0	-2	-1.3	4.14286	-0.796429	711	-142	55.04	-10.993	-0.4	-1.01523	2.14286	-0.473773
1856380	1457988	Spain	female	neutered	2010-04-05	Golden Retriever	36.4	9	30.31	640	Dry	Satiety Weight Management Dry	2015-04-20	4	2015-06-15	0	0	-1	-3	8	-0.951777	711	-142	55.04	-10.993	-1.7	-4.31472	3.85714	-1.11863
1856380	1457988	Spain	female	neutered	2010-04-05	Golden Retriever	35.6	9	30.31	583	Dry	Satiety Weight Management Dry	2015-04-20	5	2015-07-13	0	0	-1	-3.8	12	-0.803723	711	-142	55.04	-10.993	-0.8	-2.03046	4	-0.507614
1856383	1507106	Germany	male	neutered	2010-08-01	Giant	72.9	8	50	1324	Mix feeding	wet product : Satiety Weight Management Canine / dry product : Satiety Weight Management Dry	2015-04-21	1	2015-04-21	-1	-1	-2	0	0	#N/A	1048.5	-413	55.762	-21.965	0	0	0
1856383	1507106	Germany	male	neutered	2010-08-01	Giant	71.3	8	50	1117	Mix feeding	wet product : Satiety Weight Management Canine / dry product : Satiety Weight Management Dry	2015-04-21	2	2015-05-07	-1	-1	0	-1.6	2.28571	-0.960219	1048.5	-413	55.762	-21.965	-1.6	-2.19479	2.28571	-0.960219
1856383	1507106	Germany	male	neutered	2010-08-01	Giant	70.3	8	50	1014	Mix feeding	wet product : Satiety Weight Management Canine / dry product : Satiety Weight Management Dry	2015-04-21	3	2015-05-21	-1	0	-2	-2.6	4.28571	-0.83219	1048.5	-413	55.762	-21.965	-1	-1.37174	2	-0.685871
1856383	1507106	Germany	male	neutered	2010-08-01	Giant	68.8	8	50	911	Mix feeding	wet product : Satiety Weight Management Canine / dry product : Satiety Weight Management Dry	2015-04-21	4	2015-06-19	-1	0	-3	-4.1	8.42857	-0.667271	1048.5	-413	55.762	-21.965	-1.5	-2.05761	4.14286	-0.496665
1856383	1507106	Germany	male	neutered	2010-08-01	Giant	66.2	8	50	828	Mix feeding	wet product : Satiety Weight Management Canine / dry product : Satiety Weight Management Dry	2015-04-21	5	2015-07-24	-1	0	-3	-6.7	13.4286	-0.684412	1048.5	-413	55.762	-21.965	-2.6	-3.56653	5	-0.713306
1856498	1516247	Finland	male	neutered	2006-04-14	Beagle	19.5	8	15	537	Dry	Satiety Weight Management Dry	2015-04-20	1	2015-04-20	0	0	-2	0	0	#N/A	537	0	70.454	0	0	0	0
1856498	1516247	Finland	male	neutered	2006-04-14	Beagle	18.6	8	15	537	Dry	Satiety Weight Management Dry	2015-04-20	2	2015-05-04	0	0	-1	-0.9	2	-2.30769	537	0	70.454	0	-0.9	-4.61538	2	-2.30769
1856498	1516247	Finland	male	neutered	2006-04-14	Beagle	18.4	8	15	537	Dry	Satiety Weight Management Dry	2015-04-20	3	2015-05-22	0	0	-1	-1.1	4.57143	-1.23397	537	0	70.454	0	-0.2	-1.02564	2.57143	-0.39886
1856498	1516247	Finland	male	neutered	2006-04-14	Beagle	17.8	8	15	537	Dry	Satiety Weight Management Dry	2015-04-20	4	2015-06-18	0	0	-1	-1.7	8.42857	-1.03433	537	0	70.454	0	-0.6	-3.07692	3.85714	-0.797721
1856498	1516247	Finland	male	neutered	2006-04-14	Beagle	17.3	8	15	487	Dry	Satiety Weight Management Dry	2015-04-20	5	2015-07-20	1	1	-1	-2.2	13	-0.86785	537	0	70.454	0	-0.5	-2.5641	4.57143	-0.560897
1856668	1222315	Italy	female	neutered	2004-05-20	Pastore Tedesco	40.2	9	28.71	751	Dry	Satiety Weight Management Dry	2015-04-20	1	2015-04-20	0	0	-1	0	0	#N/A	659.667	-137	53.186	-11.046	0	0	0
1856668	1222315	Italy	female	neutered	2004-05-20	Pastore Tedesco	38.6	9	28.71	751	Dry	Satiety Weight Management Dry	2015-04-20	2	2015-05-02	0	0	-1	-1.6	1.71429	-2.32172	659.667	-137	53.186	-11.046	-1.6	-3.9801	1.71429	-2.32172
1856668	1222315	Italy	female	neutered	2004-05-20	Pastore Tedesco	38	9	28.71	614	Dry	Satiety Weight Management Dry	2015-04-20	3	2015-05-30	1	1	-1	-2.2	5.71429	-0.957711	659.667	-137	53.186	-11.046	-0.6	-1.49254	4	-0.373134
1856668	1222315	Italy	female	neutered	2004-05-20	Pastore Tedesco	37.7	9	28.71	614	Dry	Satiety Weight Management Dry	2015-04-20	4	2015-06-20	1	1	-1	-2.5	8.71429	-0.713645	659.667	-137	53.186	-11.046	-0.3	-0.746269	3	-0.248756
1856668	1222315	Italy	female	neutered	2004-05-20	Pastore Tedesco	35.8	9	28.71	614	Dry	Satiety Weight Management Dry	2015-04-20	5	2015-07-25	0	0	0	-4.4	13.7143	-0.798093	659.667	-137	53.186	-11.046	-1.9	-4.72637	5	-0.945274
1856721	1540757	Italy	female	neutered	2007-04-20	MINI	9.1	9	7	261	Mix feeding	wet product : Satiety Weight Management Canine / dry product : Satiety Small Dog	2015-04-20	1	2015-04-20	1	0	-1	0	0	#N/A	261	0	60.648	0	0	0	0
1856721	1540757	Italy	female	neutered	2007-04-20	MINI	8.7	9	7	261	Mix feeding	wet product : Satiety Weight Management Canine / dry product : Satiety Small Dog	2015-04-20	2	2015-05-04	1	0	-1	-0.4	2	-2.1978	261	0	60.648	0	-0.4	-4.3956	2	-2.1978
1856721	1540757	Italy	female	neutered	2007-04-20	MINI	8.3	9	7	261	Dry	Satiety Small Dog	2015-04-20	3	2015-05-18	1	1	-1	-0.8	4	-2.1978	261	0	60.648	0	-0.4	-4.3956	2	-2.1978
1856721	1540757	Italy	female	neutered	2007-04-20	MINI	7.7	9	7	261	Mix feeding	wet product : Satiety Weight Management Canine / dry product : Satiety Small Dog	2015-04-20	4	2015-06-19	0	1	-1	-1.4	8.57143	-1.79487	261	0	60.648	0	-0.6	-6.59341	4.57143	-1.44231
1856721	1540757	Italy	female	neutered	2007-04-20	MINI	7.4	9	7	261	Mix feeding	wet product : Satiety Weight Management Canine / dry product : Satiety Small Dog	2015-04-20	5	2015-07-20	1	1	-1	-1.7	13	-1.43702	261	0	60.648	0	-0.3	-3.2967	4.42857	-0.744417
1857332	1523346	Finland	female	neutered	2005-04-21	Shetland Sheepdog	7.4	8	5.69	223	Mix feeding	wet product : Satiety Weight Management Canine / dry product : Satiety Small Dog	2015-04-21	1	2015-04-21	0	0	-2	0	0	#N/A	206.333	-20	56.006	-5.429	0	0	0
1857332	1523346	Finland	female	neutered	2005-04-21	Shetland Sheepdog	7.3	8	5.69	203	Mix feeding	wet product : Satiety Weight Management Canine / dry product : Satiety Small Dog	2015-04-21	2	2015-05-05	0	0	-2	-0.1	2	-0.675676	206.333	-20	56.006	-5.429	-0.1	-1.35135	2	-0.675676
1857332	1523346	Finland	female	neutered	2005-04-21	Shetland Sheepdog	7	8	5.69	203	Mix feeding	wet product : Satiety Weight Management Canine / dry product : Satiety Small Dog	2015-04-21	3	2015-05-19	0	0	-2	-0.4	4	-1.35135	206.333	-20	56.006	-5.429	-0.3	-4.05405	2	-2.02703
1857332	1523346	Finland	female	neutered	2005-04-21	Shetland Sheepdog	6.7	8	5.69	203	Mix feeding	wet product : Satiety Weight Management Canine / dry product : Satiety Small Dog	2015-04-21	4	2015-06-16	0	0	-2	-0.7	8	-1.18243	206.333	-20	56.006	-5.429	-0.3	-4.05405	4	-1.01351
1857332	1523346	Finland	female	neutered	2005-04-21	Shetland Sheepdog	6.45	8	5.69	203	Mix feeding	wet product : Satiety Weight Management Canine / dry product : Satiety Small Dog	2015-04-21	5	2015-07-14	0	0	-1	-0.95	12	-1.06982	206.333	-20	56.006	-5.429	-0.25	-3.37838	4	-0.844595
1857350	1523992	Slovakia	female	neutered	2002-06-15	Labrador Retriever	33.4	9	25.69	691	Dry	Satiety Weight Management Dry	2015-05-04	1	2015-05-04	0	0	-2	0	0	#N/A	670	0	58.715	0	0	0	0
1857350	1523992	Slovakia	female	neutered	2002-06-15	Labrador Retriever	32.8	9	25.69	691	Dry	Satiety Weight Management Dry	2015-05-04	2	2015-05-23	0	0	0	-0.6	2.71429	-0.661834	670	0	58.715	0	-0.6	-1.79641	2.71429	-0.661834
1857350	1523992	Slovakia	female	neutered	2002-06-15	Labrador Retriever	32.3	9	25.69	628	Dry	Satiety Weight Management Dry	2015-05-04	3	2015-06-05	0	0	-3	-1.1	4.57143	-0.720434	670	0	58.715	0	-0.5	-1.49701	1.85714	-0.80608
1857350	1523992	Slovakia	female	neutered	2002-06-15	Labrador Retriever	32.3	9	25.69	691	Dry	Satiety Weight Management Dry	2015-05-04	4	2015-06-27	0	0	-2	-1.1	7.71429	-0.426924	670	0	58.715	0	0	0	3.14286	0
1857350	1523992	Slovakia	female	neutered	2002-06-15	Labrador Retriever	32	9	25.69	628	Dry	Satiety Weight Management Dry	2015-05-04	5	2015-08-10	0	0	-2	-1.4	14	-0.299401	670	0	58.715	0	-0.3	-0.898204	6.28571	-0.142896
1857489	1512733	Germany	female	neutered	2005-04-21	Maxi	31	8	26	697	Dry	Satiety Weight Management Dry	2015-04-28	1	2015-04-27	0	0	-2	0	0	#N/A	633.667	-127	55.034	-11.03	0	0	0
1857489	1512733	Germany	female	neutered	2005-04-21	Maxi	31	8	26	697	Dry	Satiety Weight Management Dry	2015-04-28	2	2015-04-28	0	0	-2	0	0.142857	0	633.667	-127	55.034	-11.03	0	0	0.142857	#N/A
1857489	1512733	Germany	female	neutered	2005-04-21	Maxi	29.9	8	26	634	Dry	Satiety Weight Management Dry	2015-04-28	3	2015-06-02	0	0	-1	-1.1	5.14286	-0.689964	633.667	-127	55.034	-11.03	-1.1	-3.54839	5	-0.709677
1857489	1512733	Germany	female	neutered	2005-04-21	Maxi	28.9	8	26	570	Dry	Satiety Weight Management Dry	2015-04-28	4	2015-06-15	0	0	-2	-2.1	7	-0.967742	633.667	-127	55.034	-11.03	-1	-3.22581	1.85714	-1.73697
1857489	1512733	Germany	female	neutered	2005-04-21	Maxi	28.1	8	26	520	Dry	Satiety Weight Management Dry	2015-04-28	5	2015-07-13	1	1	-2	-2.9	11	-0.85044	633.667	-127	55.034	-11.03	-0.8	-2.58065	4	-0.645161
1857517	1516936	Canada	male	neutered	2011-04-12	English Bulldog	38	8	27.14	838	Dry	Satiety Weight Management Dry	2015-04-22	1	2015-04-22	0	1	-3	0	0	#N/A	776.667	-92	65.317	-7.737	0	0	0
1857517	1516936	Canada	male	neutered	2011-04-12	English Bulldog	37.2	8	27.14	838	Dry	Satiety Weight Management Dry	2015-04-22	2	2015-05-06	0	1	-2	-0.8	2	-1.05263	776.667	-92	65.317	-7.737	-0.8	-2.10526	2	-1.05263
1857517	1516936	Canada	male	neutered	2011-04-12	English Bulldog	37.9	8	27.14	746	Dry	Satiety Weight Management Dry	2015-04-22	3	2015-05-21	0	1	-1	-0.1	4.14286	-0.0635209	776.667	-92	65.317	-7.737	0.7	1.84211	2.14286	0.859649
1857517	1516936	Canada	male	neutered	2011-04-12	English Bulldog	37.6	8	27.14	746	Dry	Satiety Weight Management Dry	2015-04-22	4	2015-06-17	0	1	0	-0.4	8	-0.131579	776.667	-92	65.317	-7.737	-0.3	-0.789474	3.85714	-0.204678
1857517	1516936	Canada	male	neutered	2011-04-12	English Bulldog	37.5	8	27.14	668	Dry	Satiety Weight Management Dry	2015-04-22	5	2015-07-15	0	1	0	-0.5	12	-0.109649	776.667	-92	65.317	-7.737	-0.1	-0.263158	4	-0.0657895
1857781	1257024	Italy	male	intact	2007-04-21	Medium	28	8	22	816	Dry	Satiety Weight Management Dry	2015-04-21	1	2015-04-21	1	0	-1	0	0	#N/A	699	-156	68.811	-15.357	0	0	0
1857781	1257024	Italy	male	intact	2007-04-21	Medium	27.5	8	22	738	Dry	Satiety Weight Management Dry	2015-04-21	2	2015-05-05	1	1	0	-0.5	2	-0.892857	699	-156	68.811	-15.357	-0.5	-1.78571	2	-0.892857
1857781	1257024	Italy	male	intact	2007-04-21	Medium	27.3	8	22	660	Dry	Satiety Weight Management Dry	2015-04-21	3	2015-05-22	1	1	0	-0.7	4.42857	-0.564516	699	-156	68.811	-15.357	-0.2	-0.714286	2.42857	-0.294118
1857781	1257024	Italy	male	intact	2007-04-21	Medium	26	8	22	660	Dry	Satiety Weight Management Dry	2015-04-21	4	2015-06-09	0	0	0	-2	7	-1.02041	699	-156	68.811	-15.357	-1.3	-4.64286	2.57143	-1.80556
1857781	1257024	Italy	male	intact	2007-04-21	Medium	25	8	22	593	Dry	Satiety Weight Management Dry	2015-04-21	5	2015-07-16	1	1	0	-3	12.2857	-0.872093	699	-156	68.811	-15.357	-1	-3.57143	5.28571	-0.675676
1857838	1542195	France	male	neutered	2007-05-08	Medium	34.5	8	28.75	847	Dry	Satiety Weight Management Dry	2015-04-21	1	2015-04-21	0	-1	-2	0	0	#N/A	847	0	68.219	0	0	0	0
1857838	1542195	France	male	neutered	2007-05-08	Medium	33	8	28.75	847	Dry	Satiety Weight Management Dry	2015-04-21	2	2015-05-04	-1	0	-1	-1.5	1.85714	-2.34114	847	0	68.219	0	-1.5	-4.34783	1.85714	-2.34114
1857838	1542195	France	male	neutered	2007-05-08	Medium	32.3	8	28.75	847	Dry	Satiety Weight Management Dry	2015-04-21	3	2015-05-13	0	0	0	-2.2	3.14286	-2.02899	847	0	68.219	0	-0.7	-2.02899	1.28571	-1.5781
1857838	1542195	France	male	neutered	2007-05-08	Medium	30.2	8	28.75	847	Dry	Satiety Weight Management Dry	2015-04-21	4	2015-06-10	0	0	-1	-4.3	7.14286	-1.74493	847	0	68.219	0	-2.1	-6.08696	4	-1.52174
1857838	1542195	France	male	neutered	2007-05-08	Medium	30.2	8	28.75	847	Dry	Satiety Weight Management Dry	2015-04-21	5	2015-07-03	0	0	0	-4.3	10.4286	-1.19516	847	0	68.219	0	0	0	3.28571	0
1858078	1294212	Italy	female	neutered	2013-04-22	Beagle	22	9	16.92	505	Dry	Satiety Weight Management Dry	2015-04-22	1	2015-04-22	-1	0	-2	0	0	#N/A	505	0	60.533	0	0	0	0
1858078	1294212	Italy	female	neutered	2013-04-22	Beagle	21.1	9	16.92	505	Dry	Satiety Weight Management Dry	2015-04-22	2	2015-05-04	-1	0	-2	-0.9	1.71429	-2.38636	505	0	60.533	0	-0.9	-4.09091	1.71429	-2.38636
1858078	1294212	Italy	female	neutered	2013-04-22	Beagle	20.5	9	16.92	505	Dry	Satiety Weight Management Dry	2015-04-22	3	2015-05-20	0	0	-1	-1.5	4	-1.70455	505	0	60.533	0	-0.6	-2.72727	2.28571	-1.19318
1858078	1294212	Italy	female	neutered	2013-04-22	Beagle	20	9	16.92	505	Dry	Satiety Weight Management Dry	2015-04-22	4	2015-06-18	0	0	-1	-2	8.14286	-1.11643	505	0	60.533	0	-0.5	-2.27273	4.14286	-0.548589
1858078	1294212	Italy	female	neutered	2013-04-22	Beagle	19.1	9	16.92	505	Dry	Satiety Weight Management Dry	2015-04-22	5	2015-07-21	0	0	-1	-2.9	12.8571	-1.02525	505	0	60.533	0	-0.9	-4.09091	4.71429	-0.867769
1858097	1510444	Germany	male	intact	2008-03-04	Maxi	31.3	8	26.08	927	Dry	Satiety Weight Management Dry	2015-04-24	1	2015-04-24	0	1	0	0	0	#N/A	823.167	-178	71.328	-15.424	0	0	0
1858097	1510444	Germany	male	intact	2008-03-04	Maxi	30.8	8	26.08	838	Dry	Satiety Weight Management Dry	2015-04-24	2	2015-05-08	0	0	-2	-0.5	2	-0.798722	823.167	-178	71.328	-15.424	-0.5	-1.59744	2	-0.798722
1858097	1510444	Germany	male	intact	2008-03-04	Maxi	29.9	8	26.08	838	Dry	Satiety Weight Management Dry	2015-04-24	3	2015-05-22	1	1	-1	-1.4	4	-1.11821	823.167	-178	71.328	-15.424	-0.9	-2.8754	2	-1.4377
1858097	1510444	Germany	male	intact	2008-03-04	Maxi	29.2	8	26.08	749	Dry	Satiety Weight Management Dry	2015-04-24	4	2015-06-19	1	1	0	-2.1	8	-0.838658	823.167	-178	71.328	-15.424	-0.7	-2.23642	4	-0.559105
1858097	1510444	Germany	male	intact	2008-03-04	Maxi	28.8	8	26.08	673	Dry	Satiety Weight Management Dry	2015-04-24	5	2015-07-09	1	1	0	-2.5	10.8571	-0.735665	823.167	-178	71.328	-15.424	-0.4	-1.27796	2.85714	-0.447284
1858106	1510444	Germany	female	intact	2011-01-01	Maxi	32	8	22.86	737	Dry	Satiety Weight Management Dry	2015-04-24	1	2015-04-24	-1	0	0	0	0	#N/A	737	0	70.495	0	0	0	0
1858106	1510444	Germany	female	intact	2011-01-01	Maxi	30	8	22.86	737	Dry	Satiety Weight Management Dry	2015-04-24	2	2015-05-22	0	1	-1	-2	4	-1.5625	737	0	70.495	0	-2	-6.25	4	-1.5625
1858106	1510444	Germany	female	intact	2011-01-01	Maxi	29.9	8	22.86	737	Dry	Satiety Weight Management Dry	2015-04-24	3	2015-05-28	1	0	-1	-2.1	4.85714	-1.3511	737	0	70.495	0	-0.1	-0.3125	0.857143	-0.364583
1858106	1510444	Germany	female	intact	2011-01-01	Maxi	29.1	8	22.86	737	Dry	Satiety Weight Management Dry	2015-04-24	4	2015-06-19	1	0	-1	-2.9	8	-1.13281	737	0	70.495	0	-0.8	-2.5	3.14286	-0.795455
1858106	1510444	Germany	female	intact	2011-01-01	Maxi	28.2	8	22.86	737	Dry	Satiety Weight Management Dry	2015-04-24	5	2015-07-09	1	1	-1	-3.8	10.8571	-1.09375	737	0	70.495	0	-0.9	-2.8125	2.85714	-0.984375
1858146	1516251	Finland	female	intact	2010-10-12	Welsh Terrier	13.4	7	10.31	406	Dry	Satiety Weight Management Dry	2015-04-22	1	2015-04-22	1	1	0	0	0	#N/A	294	-152	51.098	-26.418	0	0	0
1858146	1516251	Finland	female	intact	2010-10-12	Welsh Terrier	13.3	7	10.31	304	Mix feeding	wet product : Satiety Weight Management Canine / dry product : Satiety Weight Management Dry	2015-04-22	2	2015-05-06	1	1	0	-0.1	2	-0.373134	294	-152	51.098	-26.418	-0.1	-0.746269	2	-0.373134
1858146	1516251	Finland	female	intact	2010-10-12	Welsh Terrier	13.1	7	10.31	273	Mix feeding	wet product : Satiety Weight Management Canine / dry product : Satiety Weight Management Dry	2015-04-22	3	2015-05-27	0	0	0	-0.3	5	-0.447761	294	-152	51.098	-26.418	-0.2	-1.49254	3	-0.497512
1858146	1516251	Finland	female	intact	2010-10-12	Welsh Terrier	12.8	7	10.31	254	Mix feeding	wet product : Satiety Weight Management Canine / dry product : Satiety Weight Management Dry	2015-04-22	4	2015-06-10	1	1	0	-0.6	7	-0.639659	294	-152	51.098	-26.418	-0.3	-2.23881	2	-1.1194
1858146	1516251	Finland	female	intact	2010-10-12	Welsh Terrier	12.5	7	10.31	254	Mix feeding	wet product : Satiety Weight Management Canine / dry product : Satiety Weight Management Dry	2015-04-22	5	2015-07-01	1	1	0	-0.9	10	-0.671642	294	-152	51.098	-26.418	-0.3	-2.23881	3	-0.746269
1858396	1539906	Germany	male	neutered	2012-08-09	Englischer Cocker Spaniel	23.6	8	18.15	620	Dry	Satiety Weight Management Dry	2015-04-27	1	2015-04-27	0	1	-3	0	0	#N/A	516.333	-165	58.718	-18.764	0	0	0
1858396	1539906	Germany	male	neutered	2012-08-09	Englischer Cocker Spaniel	23.2	8	18.15	562	Dry	Satiety Weight Management Dry	2015-04-27	2	2015-05-11	0	0	-3	-0.4	2	-0.847458	516.333	-165	58.718	-18.764	-0.4	-1.69492	2	-0.847458
1858396	1539906	Germany	male	neutered	2012-08-09	Englischer Cocker Spaniel	22.8	8	18.15	503	Dry	Satiety Weight Management Dry	2015-04-27	3	2015-06-02	0	0	-3	-0.8	5.14286	-0.659134	516.333	-165	58.718	-18.764	-0.4	-1.69492	3.14286	-0.539291
1858396	1539906	Germany	male	neutered	2012-08-09	Englischer Cocker Spaniel	22.4	8	18.15	455	Dry	Satiety Weight Management Dry	2015-04-27	4	2015-06-25	0	0	-3	-1.2	8.42857	-0.603275	516.333	-165	58.718	-18.764	-0.4	-1.69492	3.28571	-0.515844
1858396	1539906	Germany	male	neutered	2012-08-09	Englischer Cocker Spaniel	21.6	8	18.15	407	Dry	Satiety Weight Management Dry	2015-04-27	5	2015-07-16	0	0	-3	-2	11.4286	-0.741525	516.333	-165	58.718	-18.764	-0.8	-3.38983	3	-1.12994
1859822	1535680	Argentina	female	intact	2008-11-03	Labrador Retriever	36.2	8	27.85	867	Dry	Satiety Weight Management Dry	2015-04-24	1	2015-04-24	1	0	-1	0	0	#N/A	867	0	71.516	0	0	0	0
1859822	1535680	Argentina	female	intact	2008-11-03	Labrador Retriever	35.2	8	27.85	867	Dry	Satiety Weight Management Dry	2015-04-24	2	2015-05-09	1	0	-2	-1	2.14286	-1.28913	867	0	71.516	0	-1	-2.76243	2.14286	-1.28913
1859822	1535680	Argentina	female	intact	2008-11-03	Labrador Retriever	33.3	8	27.85	867	Dry	Satiety Weight Management Dry	2015-04-24	3	2015-05-27	1	0	-3	-2.9	4.71429	-1.69931	867	0	71.516	0	-1.9	-5.24862	2.57143	-2.04113
1859822	1535680	Argentina	female	intact	2008-11-03	Labrador Retriever	31.8	8	27.85	867	Dry	Satiety Weight Management Dry	2015-04-24	4	2015-06-25	1	0	-2	-4.4	8.85714	-1.3723	867	0	71.516	0	-1.5	-4.14365	4.14286	-1.00019
1859822	1535680	Argentina	female	intact	2008-11-03	Labrador Retriever	29.5	8	27.85	867	Dry	Satiety Weight Management Dry	2015-04-24	5	2015-07-25	1	0	-2	-6.7	13.1429	-1.40824	867	0	71.516	0	-2.3	-6.35359	4.28571	-1.4825
1860081	1544721	Argentina	female	neutered	2004-04-22	Beagle	14.8	9	11.38	375	Dry	Satiety Weight Management Dry	2015-04-29	1	2015-04-29	0	0	0	0	0	#N/A	409.167	41	66.038	6.617	0	0	0
1860081	1544721	Argentina	female	neutered	2004-04-22	Beagle	13.7	9	11.38	416	Dry	Satiety Weight Management Dry	2015-04-29	2	2015-05-11	1	0	-3	-1.1	1.71429	-4.33559	409.167	41	66.038	6.617	-1.1	-7.43243	1.71429	-4.33559
1860081	1544721	Argentina	female	neutered	2004-04-22	Beagle	13.3	9	11.38	416	Dry	Satiety Weight Management Dry	2015-04-29	3	2015-05-27	0	1	-2	-1.5	4	-2.53378	409.167	41	66.038	6.617	-0.4	-2.7027	2.28571	-1.18243
1860081	1544721	Argentina	female	neutered	2004-04-22	Beagle	12.5	9	11.38	416	Dry	Satiety Weight Management Dry	2015-04-29	4	2015-07-03	1	1	-3	-2.3	9.28571	-1.6736	409.167	41	66.038	6.617	-0.8	-5.40541	5.28571	-1.02264
1860081	1544721	Argentina	female	neutered	2004-04-22	Beagle	12	9	11.38	416	Dry	Satiety Weight Management Dry	2015-04-29	5	2015-08-05	0	0	-1	-2.8	14	-1.35135	409.167	41	66.038	6.617	-0.5	-3.37838	4.71429	-0.716626
1860141	1524406	Brazil	male	neutered	2011-04-18	Yorkshire Terrier	9.4	9	6.71	289	Dry	Satiety Weight Management Dry	2015-04-22	1	2015-04-22	0	0	-3	0	0	#N/A	271	-27	65.002	-6.476	0	0	0
1860141	1524406	Brazil	male	neutered	2011-04-18	Yorkshire Terrier	9.2	9	6.71	289	Dry	Satiety Weight Management Dry	2015-04-22	2	2015-05-11	0	0	-2	-0.2	2.71429	-0.783875	271	-27	65.002	-6.476	-0.2	-2.12766	2.71429	-0.783875
1860141	1524406	Brazil	male	neutered	2011-04-18	Yorkshire Terrier	9.25	9	6.71	262	Dry	Satiety Weight Management Dry	2015-04-22	3	2015-05-22	1	1	-2	-0.15	4.28571	-0.37234	271	-27	65.002	-6.476	0.05	0.531915	1.57143	0.338491
1860141	1524406	Brazil	male	neutered	2011-04-18	Yorkshire Terrier	8.6	9	6.71	262	Dry	Satiety Weight Management Dry	2015-04-22	4	2015-06-23	1	1	-2	-0.8	8.85714	-0.960879	271	-27	65.002	-6.476	-0.65	-6.91489	4.57143	-1.51263
1860141	1524406	Brazil	male	neutered	2011-04-18	Yorkshire Terrier	8.5	9	6.71	234	Dry	Satiety Weight Management Dry	2015-04-22	5	2015-07-21	1	1	-2	-0.9	12.8571	-0.744681	271	-27	65.002	-6.476	-0.1	-1.06383	4	-0.265957
1860144	1524406	Brazil	female	neutered	2006-04-13	Medium	22.8	9	17.54	519	Dry	Satiety Weight Management Dry	2015-04-22	1	2015-04-22	0	0	-1	0	0	#N/A	468.667	-94	54.682	-10.967	0	0	0
1860144	1524406	Brazil	female	neutered	2006-04-13	Medium	21.65	9	17.54	519	Dry	Satiety Weight Management Dry	2015-04-22	2	2015-05-11	1	0	-1	-1.15	2.71429	-1.85826	468.667	-94	54.682	-10.967	-1.15	-5.04386	2.71429	-1.85826
1860144	1524406	Brazil	female	neutered	2006-04-13	Medium	21.45	9	17.54	462	Dry	Satiety Weight Management Dry	2015-04-22	3	2015-05-22	1	-1	-2	-1.35	4.28571	-1.38158	468.667	-94	54.682	-10.967	-0.2	-0.877193	1.57143	-0.558214
1860144	1524406	Brazil	female	neutered	2006-04-13	Medium	20.8	9	17.54	425	Dry	Satiety Weight Management Dry	2015-04-22	4	2015-06-23	1	-1	-3	-2	8.85714	-0.990379	468.667	-94	54.682	-10.967	-0.65	-2.85088	4.57143	-0.623629
1860144	1524406	Brazil	female	neutered	2006-04-13	Medium	20.05	9	17.54	425	Dry	Satiety Weight Management Dry	2015-04-22	5	2015-07-21	1	-1	-3	-2.75	12.8571	-0.938109	468.667	-94	54.682	-10.967	-0.75	-3.28947	4	-0.822368
1860145	1524406	Brazil	female	neutered	2011-04-18	Medium	23.5	9	18.08	531	Dry	Satiety Weight Management Dry	2015-04-22	1	2015-04-22	0	0	-1	0	0	#N/A	479.667	-96	54.707	-10.949	0	0	0
1860145	1524406	Brazil	female	neutered	2011-04-18	Medium	22.45	9	18.08	531	Dry	Satiety Weight Management Dry	2015-04-22	2	2015-05-11	0	0	-1	-1.05	2.71429	-1.64614	479.667	-96	54.707	-10.949	-1.05	-4.46809	2.71429	-1.64614
1860145	1524406	Brazil	female	neutered	2011-04-18	Medium	22.1	9	18.08	473	Dry	Satiety Weight Management Dry	2015-04-22	3	2015-05-22	0	0	-1	-1.4	4.28571	-1.39007	479.667	-96	54.707	-10.949	-0.35	-1.48936	1.57143	-0.947776
1860145	1524406	Brazil	female	neutered	2011-04-18	Medium	21.05	9	18.08	435	Dry	Satiety Weight Management Dry	2015-04-22	4	2015-06-23	0	0	-1	-2.45	8.85714	-1.17708	479.667	-96	54.707	-10.949	-1.05	-4.46809	4.57143	-0.977394
1860145	1524406	Brazil	female	neutered	2011-04-18	Medium	20.45	9	18.08	435	Dry	Satiety Weight Management Dry	2015-04-22	5	2015-07-21	0	0	-1	-3.05	12.8571	-1.00946	479.667	-96	54.707	-10.949	-0.6	-2.55319	4	-0.638298
1860148	1524406	Brazil	male	neutered	2007-04-19	Cocker Spaniel	20.8	8	14.86	533	Dry	Satiety Weight Management Dry	2015-04-22	1	2015-04-22	0	0	-1	0	0	#N/A	519.333	-58	68.617	-7.663	0	0	0
1860148	1524406	Brazil	male	neutered	2007-04-19	Cocker Spaniel	19.5	8	14.86	583	Dry	Satiety Weight Management Dry	2015-04-22	2	2015-05-11	0	0	-1	-1.3	2.71429	-2.30263	519.333	-58	68.617	-7.663	-1.3	-6.25	2.71429	-2.30263
1860148	1524406	Brazil	male	neutered	2007-04-19	Cocker Spaniel	19.5	8	14.86	525	Dry	Satiety Weight Management Dry	2015-04-22	3	2015-05-22	1	0	-1	-1.3	4.28571	-1.45833	519.333	-58	68.617	-7.663	0	0	1.57143	0
1860148	1524406	Brazil	male	neutered	2007-04-19	Cocker Spaniel	18.75	8	14.86	475	Dry	Satiety Weight Management Dry	2015-04-22	4	2015-06-23	1	0	-2	-2.05	8.85714	-1.11275	519.333	-58	68.617	-7.663	-0.75	-3.60577	4.57143	-0.788762
1860148	1524406	Brazil	male	neutered	2007-04-19	Cocker Spaniel	17.9	8	14.86	475	Dry	Satiety Weight Management Dry	2015-04-22	5	2015-07-21	1	1	-2	-2.9	12.8571	-1.0844	519.333	-58	68.617	-7.663	-0.85	-4.08654	4	-1.02163
1860152	1524406	Brazil	female	neutered	2011-04-18	Medium	19.75	8	16.46	486	Dry	Satiety Weight Management Dry	2015-04-22	1	2015-04-22	0	0	-3	0	0	#N/A	441	-90	53.966	-11.013	0	0	0
1860152	1524406	Brazil	female	neutered	2011-04-18	Medium	19.15	8	16.46	486	Dry	Satiety Weight Management Dry	2015-04-22	2	2015-05-11	1	0	-3	-0.6	2.71429	-1.11925	441	-90	53.966	-11.013	-0.6	-3.03797	2.71429	-1.11925
1860152	1524406	Brazil	female	neutered	2011-04-18	Medium	18.9	8	16.46	441	Dry	Satiety Weight Management Dry	2015-04-22	3	2015-05-22	1	1	-3	-0.85	4.28571	-1.00422	441	-90	53.966	-11.013	-0.25	-1.26582	1.57143	-0.805524
1860152	1524406	Brazil	female	neutered	2011-04-18	Medium	18.5	8	16.46	396	Dry	Satiety Weight Management Dry	2015-04-22	4	2015-06-23	1	1	-2	-1.25	8.85714	-0.714577	441	-90	53.966	-11.013	-0.4	-2.02532	4.57143	-0.443038
1860152	1524406	Brazil	female	neutered	2011-04-18	Medium	17.4	8	16.46	396	Dry	Satiety Weight Management Dry	2015-04-22	5	2015-07-21	1	1	-3	-2.35	12.8571	-0.925457	441	-90	53.966	-11.013	-1.1	-5.56962	4	-1.39241
1860182	1518334	Argentina	female	intact	2003-07-07	Border Collie	23.5	8	19.58	656	Dry	Satiety Weight Management Dry	2015-04-24	1	2015-04-24	0	0	0	0	0	#N/A	594.333	-123	63.851	-13.214	0	0	0
1860182	1518334	Argentina	female	intact	2003-07-07	Border Collie	22.3	8	19.58	656	Dry	Satiety Weight Management Dry	2015-04-24	2	2015-05-09	0	0	-2	-1.2	2.14286	-2.38298	594.333	-123	63.851	-13.214	-1.2	-5.10638	2.14286	-2.38298
1860182	1518334	Argentina	female	intact	2003-07-07	Border Collie	21.3	8	19.58	594	Dry	Satiety Weight Management Dry	2015-04-24	3	2015-05-25	1	1	-1	-2.2	4.42857	-2.11393	594.333	-123	63.851	-13.214	-1	-4.25532	2.28571	-1.8617
1860182	1518334	Argentina	female	intact	2003-07-07	Border Collie	21.6	8	19.58	533	Dry	Satiety Weight Management Dry	2015-04-24	4	2015-06-12	1	1	-1	-1.9	7	-1.15502	594.333	-123	63.851	-13.214	0.3	1.2766	2.57143	0.496454
1860182	1518334	Argentina	female	intact	2003-07-07	Border Collie	19.9	8	19.58	482	Dry	Satiety Weight Management Dry	2015-04-24	5	2015-07-13	1	1	-1	-3.6	11.4286	-1.34043	594.333	-123	63.851	-13.214	-1.7	-7.23404	4.42857	-1.63349
1860284	1543935	Hungary	female	neutered	2009-11-09	Chihuahua	4	9	3.33	150	Dry	Satiety Weight Management Dry	2015-04-23	1	2015-04-23	0	-1	-2	0	0	#N/A	145.333	-14	58.957	-5.679	0	0	0
1860284	1543935	Hungary	female	neutered	2009-11-09	Chihuahua	3.9	9	3.33	150	Dry	Satiety Small Dog	2015-04-23	2	2015-05-07	0	0	-2	-0.1	2	-1.25	145.333	-14	58.957	-5.679	-0.1	-2.5	2	-1.25
1860284	1543935	Hungary	female	neutered	2009-11-09	Chihuahua	3.7	9	3.33	150	Dry	Satiety Small Dog	2015-04-23	3	2015-05-22	0	0	-2	-0.3	4.14286	-1.81034	145.333	-14	58.957	-5.679	-0.2	-5	2.14286	-2.33333
1860284	1543935	Hungary	female	neutered	2009-11-09	Chihuahua	3.65	9	3.33	136	Dry	Satiety Small Dog	2015-04-23	4	2015-06-24	0	0	-2	-0.35	8.85714	-0.987903	145.333	-14	58.957	-5.679	-0.05	-1.25	4.71429	-0.265152
1860284	1543935	Hungary	female	neutered	2009-11-09	Chihuahua	3.45	9	3.33	136	Dry	Satiety Small Dog	2015-04-23	5	2015-07-16	0	0	-2	-0.55	12	-1.14583	145.333	-14	58.957	-5.679	-0.2	-5	3.14286	-1.59091
1860291	1543935	Hungary	male	neutered	2013-01-15	Labrador Retriever	38	7	31.67	940	Dry	Satiety Weight Management Dry	2015-04-23	1	2015-04-23	0	1	-2	0	0	#N/A	808	-176	60.524	-13.183	0	0	0
1860291	1543935	Hungary	male	neutered	2013-01-15	Labrador Retriever	38	7	31.67	852	Dry	Satiety Weight Management Dry	2015-04-23	2	2015-05-07	1	1	-2	0	2	0	808	-176	60.524	-13.183	0	0	2	0
1860291	1543935	Hungary	male	neutered	2013-01-15	Labrador Retriever	36.5	7	31.67	764	Dry	Satiety Weight Management Dry	2015-04-23	3	2015-05-22	1	1	-2	-1.5	4.14286	-0.952813	808	-176	60.524	-13.183	-1.5	-3.94737	2.14286	-1.84211
1860291	1543935	Hungary	male	neutered	2013-01-15	Labrador Retriever	34.2	7	31.67	764	Dry	Satiety Weight Management Dry	2015-04-23	4	2015-06-24	1	1	-2	-3.8	8.85714	-1.12903	808	-176	60.524	-13.183	-2.3	-6.05263	4.71429	-1.28389
1860291	1543935	Hungary	male	neutered	2013-01-15	Labrador Retriever	34.7	7	31.67	691	Dry	Satiety Weight Management Dry	2015-04-23	5	2015-07-16	1	1	-2	-3.3	12	-0.723684	808	-176	60.524	-13.183	0.5	1.31579	3.14286	0.41866
1860386	1515204	Germany	female	neutered	2008-04-21	Bernese Mountain Dog	54.2	8	38.71	939	Wet	Satiety Weight Management Canine	2015-04-23	1	2015-04-23	0	0	0	0	0	#N/A	905	-102	58.315	-6.573	0	0	0
1860386	1515204	Germany	female	neutered	2008-04-21	Bernese Mountain Dog	51.7	8	38.71	939	Wet	Satiety Weight Management Canine	2015-04-23	2	2015-05-11	0	0	-2	-2.5	2.57143	-1.79377	905	-102	58.315	-6.573	-2.5	-4.61255	2.57143	-1.79377
1860386	1515204	Germany	female	neutered	2008-04-21	Bernese Mountain Dog	51	8	38.71	939	Mix feeding	wet product : Satiety Weight Management Canine / dry product : Satiety Weight Management Dry	2015-04-23	3	2015-05-29	0	0	-1	-3.2	5.14286	-1.14801	905	-102	58.315	-6.573	-0.7	-1.29151	2.57143	-0.502255
1860386	1515204	Germany	female	neutered	2008-04-21	Bernese Mountain Dog	49.5	8	38.71	837	Dry	Satiety Weight Management Dry	2015-04-23	4	2015-06-26	0	1	0	-4.7	9.14286	-0.948455	905	-102	58.315	-6.573	-1.5	-2.76753	4	-0.691882
1860386	1515204	Germany	female	neutered	2008-04-21	Bernese Mountain Dog	48.7	8	38.71	752	Dry	Satiety Weight Management Dry	2015-04-23	5	2015-07-29	1	1	0	-5.5	13.8571	-0.732301	905	-102	58.315	-6.573	-0.8	-1.47601	4.71429	-0.313094
1860632	1541502	Germany	male	neutered	2003-04-23	Medium	8.6	9	6.62	291	Dry	Satiety Small Dog	2015-04-28	1	2015-04-28	-1	-1	-3	0	0	#N/A	264	-54	63.968	-13.084	0	0	0
1860632	1541502	Germany	male	neutered	2003-04-23	Medium	8.4	9	6.62	291	Dry	Satiety Small Dog	2015-04-28	2	2015-05-13	0	0	-2	-0.2	2.14286	-1.08527	264	-54	63.968	-13.084	-0.2	-2.32558	2.14286	-1.08527
1860632	1541502	Germany	male	neutered	2003-04-23	Medium	8.3	9	6.62	264	Dry	Satiety Small Dog	2015-04-28	3	2015-05-26	0	0	-2	-0.3	4	-0.872093	264	-54	63.968	-13.084	-0.1	-1.16279	1.85714	-0.626118
1860632	1541502	Germany	male	neutered	2003-04-23	Medium	7.9	9	6.62	237	Dry	Satiety Small Dog	2015-04-28	4	2015-06-30	0	1	-1	-0.7	9	-0.904393	264	-54	63.968	-13.084	-0.4	-4.65116	5	-0.930233
1860632	1541502	Germany	male	neutered	2003-04-23	Medium	7.8	9	6.62	214	Dry	Satiety Small Dog	2015-04-28	5	2015-07-27	0	1	-1	-0.8	12.8571	-0.723514	264	-54	63.968	-13.084	-0.1	-1.16279	3.85714	-0.301464
1860636	1541502	Germany	female	neutered	2002-04-23	MINI	9	7	7.5	275	Dry	Satiety Small Dog	2015-05-06	1	2015-05-06	-1	-1	-3	0	0	#N/A	300	30	66.195	6.62	0	0	0
1860636	1541502	Germany	female	neutered	2002-04-23	MINI	8.1	7	7.5	305	Dry	Satiety Small Dog	2015-05-06	2	2015-05-20	-1	0	-2	-0.9	2	-5	300	30	66.195	6.62	-0.9	-10	2	-5
1860636	1541502	Germany	female	neutered	2002-04-23	MINI	7.9	7	7.5	305	Dry	Satiety Small Dog	2015-05-06	3	2015-06-06	0	0	-2	-1.1	4.42857	-2.75986	300	30	66.195	6.62	-0.2	-2.22222	2.42857	-0.915033
1860636	1541502	Germany	female	neutered	2002-04-23	MINI	7.7	7	7.5	305	Dry	Satiety Small Dog	2015-05-06	4	2015-07-08	0	1	-1	-1.3	9	-1.60494	300	30	66.195	6.62	-0.2	-2.22222	4.57143	-0.486111
1860636	1541502	Germany	female	neutered	2002-04-23	MINI	7.4	7	7.5	305	Dry	Satiety Small Dog	2015-05-06	5	2015-08-06	0	1	-1	-1.6	13.1429	-1.35266	300	30	66.195	6.62	-0.3	-3.33333	4.14286	-0.804598
1860704	1537002	Germany	female	neutered	2005-04-23	Jack Russell Terrier	10.25	8	8	288	Dry	Satiety Weight Management Dry	2015-04-23	1	2015-04-23	-1	0	-3	0	0	#N/A	258.667	-57	54.378	-11.983	0	0	0
1860704	1537002	Germany	female	neutered	2005-04-23	Jack Russell Terrier	#N/A	8	8	288	Dry	Satiety Weight Management Dry	2015-04-23	2	2015-05-07	-1	0	-2	#N/A	2	#N/A	258.667	-57	54.378	-11.983	#N/A	#N/A	2
1860704	1537002	Germany	female	neutered	2005-04-23	Jack Russell Terrier	9.85	8	8	257	Dry	Satiety Weight Management Dry	2015-04-23	3	2015-05-21	0	0	-2	-0.4	4	-0.97561	258.667	-57	54.378	-11.983	#N/A	#N/A	2
1860704	1537002	Germany	female	neutered	2005-04-23	Jack Russell Terrier	9.7	8	8	231	Dry	Satiety Weight Management Dry	2015-04-23	4	2015-06-22	0	0	-2	-0.55	8.57143	-0.626016	258.667	-57	54.378	-11.983	-0.15	-1.46341	4.57143	-0.320122
1860704	1537002	Germany	female	neutered	2005-04-23	Jack Russell Terrier	9.5	8	8	210	Dry	Satiety Weight Management Dry	2015-04-23	5	2015-07-24	0	0	-2	-0.75	13.1429	-0.556734	258.667	-57	54.378	-11.983	-0.2	-1.95122	4.57143	-0.426829
1860707	1543935	Hungary	female	neutered	2010-04-23	Cavalier King Charles Spaniel	13	8	10	341	Dry	Satiety Weight Management Dry	2015-04-23	1	2015-04-23	1	1	-3	0	0	#N/A	315.167	-31	56.045	-5.513	0	0	0
1860707	1543935	Hungary	female	neutered	2010-04-23	Cavalier King Charles Spaniel	13	8	10	310	Dry	Satiety Small Dog	2015-04-23	2	2015-05-07	1	1	-3	0	2	0	315.167	-31	56.045	-5.513	0	0	2	0
1860707	1543935	Hungary	female	neutered	2010-04-23	Cavalier King Charles Spaniel	12.1	8	10	310	Dry	Satiety Small Dog	2015-04-23	3	2015-05-22	1	1	-3	-0.9	4.14286	-1.67109	315.167	-31	56.045	-5.513	-0.9	-6.92308	2.14286	-3.23077
1860707	1543935	Hungary	female	neutered	2010-04-23	Cavalier King Charles Spaniel	11.5	8	10	310	Dry	Satiety Small Dog	2015-04-23	4	2015-06-23	1	0	-2	-1.5	8.71429	-1.32409	315.167	-31	56.045	-5.513	-0.6	-4.61538	4.57143	-1.00962
1860707	1543935	Hungary	female	neutered	2010-04-23	Cavalier King Charles Spaniel	10.9	8	10	310	Dry	Satiety Small Dog	2015-04-23	5	2015-07-16	1	0	-2	-2.1	12	-1.34615	315.167	-31	56.045	-5.513	-0.6	-4.61538	3.28571	-1.40468
1860734	1253692	Italy	female	neutered	2012-09-22	Beagle	17.7	7	12.64	406	Mix feeding	wet product : Satiety Weight Management Canine / dry product : Satiety Weight Management Dry	2015-04-23	1	2015-04-23	0	1	0	0	0	#N/A	391.333	-44	58.376	-6.564	0	0	0
1860734	1253692	Italy	female	neutered	2012-09-22	Beagle	17.2	7	12.64	406	Mix feeding	wet product : Satiety Weight Management Canine / dry product : Satiety Weight Management Dry	2015-04-23	2	2015-05-08	0	1	-1	-0.5	2.14286	-1.31827	391.333	-44	58.376	-6.564	-0.5	-2.82486	2.14286	-1.31827
1860734	1253692	Italy	female	neutered	2012-09-22	Beagle	16.9	7	12.64	406	Mix feeding	wet product : Satiety Weight Management Canine / dry product : Satiety Weight Management Dry	2015-04-23	3	2015-05-22	1	1	-1	-0.8	4.14286	-1.09098	391.333	-44	58.376	-6.564	-0.3	-1.69492	2	-0.847458
1860734	1253692	Italy	female	neutered	2012-09-22	Beagle	16.5	7	12.64	362	Mix feeding	wet product : Satiety Weight Management Canine / dry product : Satiety Weight Management Dry	2015-04-23	4	2015-06-19	1	1	-1	-1.2	8.14286	-0.83259	391.333	-44	58.376	-6.564	-0.4	-2.25989	4	-0.564972
1860734	1253692	Italy	female	neutered	2012-09-22	Beagle	16.7	7	12.64	325	Dry	Satiety Weight Management Dry	2015-04-23	5	2015-07-17	0	0	-1	-1	12.1429	-0.465271	391.333	-44	58.376	-6.564	0.2	1.12994	4	0.282486
1860933	1232865	Italy	female	neutered	2003-01-01	Maxi	41	8	31.54	806	Mix feeding	wet product : Satiety Weight Management Canine / dry product : Satiety Small Dog	2015-04-23	1	2015-04-23	-1	0	0	0	0	#N/A	781.333	-74	58.707	-5.56	0	0	0
1860933	1232865	Italy	female	neutered	2003-01-01	Maxi	40	8	31.54	806	Mix feeding	wet product : Satiety Weight Management Canine / dry product : Satiety Weight Management Dry	2015-04-23	2	2015-05-07	-1	0	-2	-1	2	-1.21951	781.333	-74	58.707	-5.56	-1	-2.43902	2	-1.21951
1860933	1232865	Italy	female	neutered	2003-01-01	Maxi	39	8	31.54	806	Mix feeding	wet product : Satiety Weight Management Canine / dry product : Satiety Weight Management Dry	2015-04-23	3	2015-05-22	-1	-1	-2	-2	4.14286	-1.17746	781.333	-74	58.707	-5.56	-1	-2.43902	2.14286	-1.13821
1860933	1232865	Italy	female	neutered	2003-01-01	Maxi	38.8	8	31.54	732	Mix feeding	wet product : Satiety Weight Management Canine / dry product : Satiety Weight Management Dry	2015-04-23	4	2015-06-18	-1	-1	-2	-2.2	8	-0.670732	781.333	-74	58.707	-5.56	-0.2	-0.487805	3.85714	-0.126468
1860933	1232865	Italy	female	neutered	2003-01-01	Maxi	37	8	31.54	659	Mix feeding	wet product : Satiety Weight Management Canine / dry product : Satiety Weight Management Dry	2015-04-23	5	2015-07-20	-1	0	-1	-4	12.5714	-0.776053	781.333	-74	58.707	-5.56	-1.8	-4.39024	4.57143	-0.960366
1860963	1503311	Portugal	female	intact	2012-12-26	Golden Retriever	34.3	8	28.58	871	Dry	Satiety Weight Management Dry	2015-04-23	1	2015-04-23	0	1	-1	0	0	#N/A	843.667	-82	68.253	-6.634	0	0	0
1860963	1503311	Portugal	female	intact	2012-12-26	Golden Retriever	33.5	8	28.58	871	Dry	Satiety Weight Management Dry	2015-04-23	2	2015-05-07	0	1	-1	-0.8	2	-1.16618	843.667	-82	68.253	-6.634	-0.8	-2.33236	2	-1.16618
1860963	1503311	Portugal	female	intact	2012-12-26	Golden Retriever	32.4	8	28.58	871	Dry	Satiety Weight Management Dry	2015-04-23	3	2015-05-21	0	1	-1	-1.9	4	-1.38484	843.667	-82	68.253	-6.634	-1.1	-3.207	2	-1.6035
1860963	1503311	Portugal	female	intact	2012-12-26	Golden Retriever	31.8	8	28.58	789	Dry	Satiety Weight Management Dry	2015-04-23	4	2015-06-15	0	0	-1	-2.5	7.57143	-0.962649	843.667	-82	68.253	-6.634	-0.6	-1.74927	3.57143	-0.489796
1860963	1503311	Portugal	female	intact	2012-12-26	Golden Retriever	31.8	8	28.58	708	Dry	Satiety Weight Management Dry	2015-04-23	5	2015-07-14	0	0	-1	-2.5	11.7143	-0.6222	843.667	-82	68.253	-6.634	0	0	4.14286	0
1861028	1433323	Italy	female	neutered	2012-10-14	Labrador Retriever	30.3	9	27.5	727	Dry	Satiety Weight Management Dry	2015-04-23	1	2015-04-23	1	0	0	0	0	#N/A	661	-132	55.043	-10.992	0	0	0
1861028	1433323	Italy	female	neutered	2012-10-14	Labrador Retriever	29	9	27.5	727	Dry	Satiety Weight Management Dry	2015-04-23	2	2015-05-12	1	1	0	-1.3	2.71429	-1.58068	661	-132	55.043	-10.992	-1.3	-4.29043	2.71429	-1.58068
1861028	1433323	Italy	female	neutered	2012-10-14	Labrador Retriever	29	9	27.5	661	Dry	Satiety Weight Management Dry	2015-04-23	3	2015-05-26	1	1	0	-1.3	4.71429	-0.910091	661	-132	55.043	-10.992	0	0	2	0
1861028	1433323	Italy	female	neutered	2012-10-14	Labrador Retriever	27.9	9	27.5	595	Dry	Satiety Weight Management Dry	2015-04-23	4	2015-06-26	1	1	0	-2.4	9.14286	-0.866337	661	-132	55.043	-10.992	-1.1	-3.63036	4.42857	-0.819759
1861028	1433323	Italy	female	neutered	2012-10-14	Labrador Retriever	27	9	27.5	595	Dry	Satiety Weight Management Dry	2015-04-23	5	2015-07-24	1	1	0	-3.3	13.1429	-0.82867	661	-132	55.043	-10.992	-0.9	-2.9703	4	-0.742574
1861046	1208300	Italy	female	intact	2010-06-01	Bichon Ã Poil FrisÃ©	6.4	8	5.33	247	Dry	Satiety Small Dog	2015-04-23	1	2015-04-23	0	0	-3	0	0	#N/A	247	0	70.413	0	0	0	0
1861046	1208300	Italy	female	intact	2010-06-01	Bichon Ã Poil FrisÃ©	6.2	8	5.33	247	Dry	Satiety Small Dog	2015-04-23	2	2015-05-11	0	0	-2	-0.2	2.57143	-1.21528	247	0	70.413	0	-0.2	-3.125	2.57143	-1.21528
1861046	1208300	Italy	female	intact	2010-06-01	Bichon Ã Poil FrisÃ©	6.1	8	5.33	247	Dry	Satiety Small Dog	2015-04-23	3	2015-05-25	0	0	-1	-0.3	4.57143	-1.02539	247	0	70.413	0	-0.1	-1.5625	2	-0.78125
1861046	1208300	Italy	female	intact	2010-06-01	Bichon Ã Poil FrisÃ©	5.6	8	5.33	247	Dry	Satiety Small Dog	2015-04-23	4	2015-06-24	1	1	-1	-0.8	8.85714	-1.41129	247	0	70.413	0	-0.5	-7.8125	4.28571	-1.82292
1861046	1208300	Italy	female	intact	2010-06-01	Bichon Ã Poil FrisÃ©	5	8	5.33	247	Dry	Satiety Small Dog	2015-04-23	5	2015-07-24	1	1	0	-1.4	13.1429	-1.6644	247	0	70.413	0	-0.6	-9.375	4.28571	-2.1875
1861069	1208300	Italy	female	neutered	2011-01-01	MINI	11.4	9	8.77	309	Dry	Satiety Small Dog	2015-04-23	1	2015-04-23	0	0	-3	0	0	#N/A	309	0	60.633	0	0	0	0
1861069	1208300	Italy	female	neutered	2011-01-01	MINI	11	9	8.77	309	Dry	Satiety Small Dog	2015-04-23	2	2015-05-11	0	0	-3	-0.4	2.57143	-1.36452	309	0	60.633	0	-0.4	-3.50877	2.57143	-1.36452
1861069	1208300	Italy	female	neutered	2011-01-01	MINI	10.75	9	8.77	309	Dry	Satiety Small Dog	2015-04-23	3	2015-05-25	0	0	-2	-0.65	4.57143	-1.24726	309	0	60.633	0	-0.25	-2.19298	2	-1.09649
1861069	1208300	Italy	female	neutered	2011-01-01	MINI	9.85	9	8.77	309	Dry	Satiety Small Dog	2015-04-23	4	2015-06-24	0	0	-1	-1.55	8.85714	-1.53509	309	0	60.633	0	-0.9	-7.89474	4.28571	-1.84211
1861069	1208300	Italy	female	neutered	2011-01-01	MINI	9	9	8.77	309	Dry	Satiety Small Dog	2015-04-23	5	2015-07-24	0	1	-1	-2.4	13.1429	-1.60183	309	0	60.633	0	-0.85	-7.45614	4.28571	-1.73977
1861090	1208300	Italy	male	intact	2007-04-23	Carlino	12.5	7	9.62	439	Dry	Satiety Small Dog	2015-04-23	1	2015-04-23	-1	0	-3	0	0	#N/A	439	0	80.368	0	0	0	0
1861090	1208300	Italy	male	intact	2007-04-23	Carlino	12	7	9.62	439	Dry	Satiety Small Dog	2015-04-23	2	2015-05-11	0	0	-2	-0.5	2.57143	-1.55556	439	0	80.368	0	-0.5	-4	2.57143	-1.55556
1861090	1208300	Italy	male	intact	2007-04-23	Carlino	11.8	7	9.62	439	Dry	Satiety Small Dog	2015-04-23	3	2015-05-25	0	0	-1	-0.7	4.57143	-1.225	439	0	80.368	0	-0.2	-1.6	2	-0.8
1861090	1208300	Italy	male	intact	2007-04-23	Carlino	11	7	9.62	439	Dry	Satiety Small Dog	2015-04-23	4	2015-06-24	0	0	-1	-1.5	8.85714	-1.35484	439	0	80.368	0	-0.8	-6.4	4.28571	-1.49333
1861090	1208300	Italy	male	intact	2007-04-23	Carlino	10	7	9.62	439	Dry	Satiety Small Dog	2015-04-23	5	2015-07-24	0	0	-1	-2.5	13.1429	-1.52174	439	0	80.368	0	-1	-8	4.28571	-1.86667
1861135	1493697	Argentina	female	neutered	2007-04-24	Medium	32	9	24.62	669	Dry	Satiety Weight Management Dry	2015-04-24	1	2015-04-24	-1	0	-2	0	0	#N/A	669	0	60.529	0	0	0	0
1861135	1493697	Argentina	female	neutered	2007-04-24	Medium	30	9	24.62	669	Dry	Satiety Weight Management Dry	2015-04-24	2	2015-05-08	0	0	-2	-2	2	-3.125	669	0	60.529	0	-2	-6.25	2	-3.125
1861135	1493697	Argentina	female	neutered	2007-04-24	Medium	28.7	9	24.62	669	Dry	Satiety Weight Management Dry	2015-04-24	3	2015-05-29	0	0	-2	-3.3	5	-2.0625	669	0	60.529	0	-1.3	-4.0625	3	-1.35417
1861135	1493697	Argentina	female	neutered	2007-04-24	Medium	28	9	24.62	669	Dry	Satiety Weight Management Dry	2015-04-24	4	2015-06-25	0	0	-2	-4	8.85714	-1.41129	669	0	60.529	0	-0.7	-2.1875	3.85714	-0.56713
1861135	1493697	Argentina	female	neutered	2007-04-24	Medium	27.5	9	24.62	669	Dry	Satiety Weight Management Dry	2015-04-24	5	2015-07-23	0	0	-2	-4.5	12.8571	-1.09375	669	0	60.529	0	-0.5	-1.5625	4	-0.390625
1861140	1518334	Argentina	male	intact	2007-10-19	Border Collie	34.4	7	26.46	937	Dry	Satiety Weight Management Dry	2015-04-24	1	2015-04-24	0	0	-3	0	0	#N/A	847.333	-179	72.629	-15.343	0	0	0
1861140	1518334	Argentina	male	intact	2007-10-19	Border Collie	32.9	7	26.46	937	Dry	Satiety Weight Management Dry	2015-04-24	2	2015-05-09	0	0	-3	-1.5	2.14286	-2.03488	847.333	-179	72.629	-15.343	-1.5	-4.36047	2.14286	-2.03488
1861140	1518334	Argentina	male	intact	2007-10-19	Border Collie	30.3	7	26.46	847	Dry	Satiety Weight Management Dry	2015-04-24	3	2015-05-25	0	1	0	-4.1	4.42857	-2.6913	847.333	-179	72.629	-15.343	-2.6	-7.55814	2.28571	-3.30669
1861140	1518334	Argentina	male	intact	2007-10-19	Border Collie	30.5	7	26.46	758	Dry	Satiety Weight Management Dry	2015-04-24	4	2015-06-12	0	1	0	-3.9	7	-1.6196	847.333	-179	72.629	-15.343	0.2	0.581395	2.57143	0.226098
1861140	1518334	Argentina	male	intact	2007-10-19	Border Collie	30	7	26.46	681	Dry	Satiety Weight Management Dry	2015-04-24	5	2015-07-13	0	1	0	-4.4	11.4286	-1.11919	847.333	-179	72.629	-15.343	-0.5	-1.45349	4.42857	-0.328207
1861175	1518332	Argentina	female	intact	2005-04-20	Fox Terrier De Pelo Duro	10.4	8	8.67	356	Dry	Satiety Weight Management Dry	2015-04-25	1	2015-04-25	1	1	0	0	0	#N/A	356	0	70.459	0	0	0	0
1861175	1518332	Argentina	female	intact	2005-04-20	Fox Terrier De Pelo Duro	10	8	8.67	356	Dry	Satiety Weight Management Dry	2015-04-25	2	2015-05-12	1	1	0	-0.4	2.42857	-1.58371	356	0	70.459	0	-0.4	-3.84615	2.42857	-1.58371
1861175	1518332	Argentina	female	intact	2005-04-20	Fox Terrier De Pelo Duro	9.4	8	8.67	356	Dry	Satiety Weight Management Dry	2015-04-25	3	2015-05-30	1	1	0	-1	5	-1.92308	356	0	70.459	0	-0.6	-5.76923	2.57143	-2.24359
1861175	1518332	Argentina	female	intact	2005-04-20	Fox Terrier De Pelo Duro	9	8	8.67	356	Dry	Satiety Weight Management Dry	2015-04-25	4	2015-06-06	1	1	0	-1.4	6	-2.24359	356	0	70.459	0	-0.4	-3.84615	1	-3.84615
1861175	1518332	Argentina	female	intact	2005-04-20	Fox Terrier De Pelo Duro	8.3	8	8.67	356	Dry	Satiety Weight Management Dry	2015-04-25	5	2015-07-13	1	1	0	-2.1	11.2857	-1.78919	356	0	70.459	0	-0.7	-6.73077	5.28571	-1.27339
1861258	1226653	Italy	male	intact	2010-04-24	Chihuahua	5.2	7	3.71	227	Dry	Satiety Small Dog	2015-04-24	1	2015-04-24	-1	0	-2	0	0	#N/A	197.667	-50	73.944	-18.704	0	0	0
1861258	1226653	Italy	male	intact	2010-04-24	Chihuahua	5.1	7	3.71	215	Dry	Satiety Small Dog	2015-04-24	2	2015-05-07	-1	0	-2	-0.1	1.85714	-1.0355	197.667	-50	73.944	-18.704	-0.1	-1.92308	1.85714	-1.0355
1861258	1226653	Italy	male	intact	2010-04-24	Chihuahua	4.7	7	3.71	195	Dry	Satiety Small Dog	2015-04-24	3	2015-05-29	0	0	-1	-0.5	5	-1.92308	197.667	-50	73.944	-18.704	-0.4	-7.69231	3.14286	-2.44755
1861258	1226653	Italy	male	intact	2010-04-24	Chihuahua	4.3	7	3.71	177	Dry	Satiety Small Dog	2015-04-24	4	2015-06-27	0	0	-1	-0.9	9.14286	-1.89303	197.667	-50	73.944	-18.704	-0.4	-7.69231	4.14286	-1.85676
1861258	1226653	Italy	male	intact	2010-04-24	Chihuahua	4.1	7	3.71	159	Dry	Satiety Small Dog	2015-04-24	5	2015-07-24	0	0	0	-1.1	13	-1.62722	197.667	-50	73.944	-18.704	-0.2	-3.84615	3.85714	-0.997151
1861272	1537002	Germany	female	intact	2008-04-24	Labrador	49	8	39	1099	Dry	Satiety Weight Management Dry	2015-04-24	1	2015-04-24	0	0	-1	0	0	#N/A	1064.67	-103	68.221	-6.6	0	0	0
1861272	1537002	Germany	female	intact	2008-04-24	Labrador	48	8	39	1099	Dry	Satiety Weight Management Dry	2015-04-24	2	2015-05-08	0	0	-1	-1	2	-1.02041	1064.67	-103	68.221	-6.6	-1	-2.04082	2	-1.02041
1861272	1537002	Germany	female	intact	2008-04-24	Labrador	46.7	8	39	1099	Dry	Satiety Weight Management Dry	2015-04-24	3	2015-05-26	0	1	-1	-2.3	4.57143	-1.02679	1064.67	-103	68.221	-6.6	-1.3	-2.65306	2.57143	-1.03175
1861272	1537002	Germany	female	intact	2008-04-24	Labrador	45	8	39	996	Dry	Satiety Weight Management Dry	2015-04-24	4	2015-06-22	0	1	-1	-4	8.42857	-0.968523	1064.67	-103	68.221	-6.6	-1.7	-3.46939	3.85714	-0.899471
1861272	1537002	Germany	female	intact	2008-04-24	Labrador	44	8	39	893	Dry	Satiety Weight Management Dry	2015-04-24	5	2015-07-17	0	0	-1	-5	12	-0.85034	1064.67	-103	68.221	-6.6	-1	-2.04082	3.57143	-0.571429
1861376	1543948	Germany	female	neutered	2011-05-13	Deutscher Schí?ferhund	40.95	8	31.5	805	Dry	Satiety Weight Management Dry	2015-04-24	1	2015-04-24	-1	0	-2	0	0	#N/A	805	0	60.543	0	0	0	0
1861376	1543948	Germany	female	neutered	2011-05-13	Deutscher Schí?ferhund	38.9	8	31.5	805	Dry	Satiety Weight Management Dry	2015-04-24	2	2015-05-11	0	0	-2	-2.05	2.42857	-2.06134	805	0	60.543	0	-2.05	-5.00611	2.42857	-2.06134
1861376	1543948	Germany	female	neutered	2011-05-13	Deutscher Schí?ferhund	38	8	31.5	805	Dry	Satiety Weight Management Dry	2015-04-24	3	2015-06-02	0	0	-1	-2.95	5.57143	-1.29301	805	0	60.543	0	-0.9	-2.1978	3.14286	-0.699301
1861376	1543948	Germany	female	neutered	2011-05-13	Deutscher Schí?ferhund	36.15	8	31.5	805	Dry	Satiety Weight Management Dry	2015-04-24	4	2015-07-03	0	1	-1	-4.8	10	-1.17216	805	0	60.543	0	-1.85	-4.5177	4.42857	-1.02013
1861376	1543948	Germany	female	neutered	2011-05-13	Deutscher Schí?ferhund	35.7	8	31.5	805	Dry	Satiety Weight Management Dry	2015-04-24	5	2015-07-03	0	1	-1	-5.25	10	-1.28205	805	0	60.543	0	-0.45	-1.0989	0	#DIV/0!
1861423	1543948	Germany	male	neutered	2012-06-25	Medium	27.45	8	20	666	Dry	Satiety Weight Management Dry	2015-04-24	1	2015-04-24	-1	-1	-2	0	0	#N/A	666	0	70.421	0	0	0	0
1861423	1543948	Germany	male	neutered	2012-06-25	Medium	26.5	8	20	666	Dry	Satiety Weight Management Dry	2015-04-24	2	2015-05-11	-1	0	-2	-0.95	2.42857	-1.42505	666	0	70.421	0	-0.95	-3.46084	2.42857	-1.42505
1861423	1543948	Germany	male	neutered	2012-06-25	Medium	25	8	20	666	Dry	Satiety Weight Management Dry	2015-04-24	3	2015-06-02	0	0	-1	-2.45	5.57143	-1.60198	666	0	70.421	0	-1.5	-5.46448	3.14286	-1.7387
1861423	1543948	Germany	male	neutered	2012-06-25	Medium	24.65	8	20	666	Dry	Satiety Weight Management Dry	2015-04-24	4	2015-07-03	0	0	-1	-2.8	10	-1.02004	666	0	70.421	0	-0.35	-1.27505	4.42857	-0.287914
1861423	1543948	Germany	male	neutered	2012-06-25	Medium	24	8	20	666	Dry	Satiety Weight Management Dry	2015-04-24	5	2015-07-23	0	0	-1	-3.45	12.8571	-0.977535	666	0	70.421	0	-0.65	-2.36794	2.85714	-0.82878
1861691	1524412	Canada	female	neutered	2013-03-27	Golden Retriever	45.75	8	38.13	929	Dry	Satiety Weight Management Dry	2015-04-27	1	2015-04-27	0	1	-1	0	0	#N/A	779.833	-236	50.822	-15.38	0	0	0
1861691	1524412	Canada	female	neutered	2013-03-27	Golden Retriever	45.3	8	38.13	844	Dry	Satiety Weight Management Dry	2015-04-27	2	2015-05-11	0	1	-2	-0.45	2	-0.491803	779.833	-236	50.822	-15.38	-0.45	-0.983607	2	-0.491803
1861691	1524412	Canada	female	neutered	2013-03-27	Golden Retriever	44.9	8	38.13	760	Dry	Satiety Weight Management Dry	2015-04-27	3	2015-05-26	0	1	-2	-0.85	4.14286	-0.448464	779.833	-236	50.822	-15.38	-0.4	-0.874317	2.14286	-0.408015
1861691	1524412	Canada	female	neutered	2013-03-27	Golden Retriever	42.65	8	38.13	693	Mix feeding	wet product : Satiety Weight Management Canine / dry product : Satiety Weight Management Dry	2015-04-27	4	2015-06-18	0	1	-3	-3.1	7.42857	-0.912148	779.833	-236	50.822	-15.38	-2.25	-4.91803	3.28571	-1.49679
1861691	1524412	Canada	female	neutered	2013-03-27	Golden Retriever	40.4	8	38.13	625	Dry	1	2015-04-27	5	2015-07-24	1	1	-1	-5.35	12.5714	-0.930204	779.833	-236	50.822	-15.38	-2.25	-4.91803	5.14286	-0.956284
1861779	1537002	Germany	male	neutered	2003-04-24	Labrador	43.9	9	38	1078	Dry	Satiety Weight Management Dry	2015-04-24	1	2015-04-24	-1	0	-1	0	0	#N/A	898.5	-286	58.706	-18.687	0	0	0
1861779	1537002	Germany	male	neutered	2003-04-24	Labrador	43.8	9	38	977	Dry	Satiety Weight Management Dry	2015-04-24	2	2015-05-08	-1	0	-1	-0.1	2	-0.113895	898.5	-286	58.706	-18.687	-0.1	-0.22779	2	-0.113895
1861779	1537002	Germany	male	neutered	2003-04-24	Labrador	43	9	38	876	Dry	Satiety Weight Management Dry	2015-04-24	3	2015-05-22	-1	0	-1	-0.9	4	-0.512528	898.5	-286	58.706	-18.687	-0.8	-1.82232	2	-0.911162
1861779	1537002	Germany	male	neutered	2003-04-24	Labrador	42.8	9	38	792	Dry	Satiety Weight Management Dry	2015-04-24	4	2015-06-22	-1	0	-1	-1.1	8.42857	-0.297286	898.5	-286	58.706	-18.687	-0.2	-0.455581	4.42857	-0.102873
1861779	1537002	Germany	male	neutered	2003-04-24	Labrador	42.5	9	38	708	Dry	Satiety Weight Management Dry	2015-04-24	5	2015-07-17	0	0	-1	-1.4	12	-0.265756	898.5	-286	58.706	-18.687	-0.3	-0.683371	3.57143	-0.191344
1862057	992342	Netherlands	male	intact	2006-10-06	Welsh Springer Spaniel	30.3	7	25.25	905	Dry	Satiety Weight Management Dry	2015-04-24	1	2015-04-24	1	0	0	0	0	#N/A	905	0	80.344	0	0	0	0
1862057	992342	Netherlands	male	intact	2006-10-06	Welsh Springer Spaniel	29.8	7	25.25	905	Dry	Satiety Weight Management Dry	2015-04-24	2	2015-05-04	0	0	0	-0.5	1.42857	-1.15512	905	0	80.344	0	-0.5	-1.65017	1.42857	-1.15512
1862057	992342	Netherlands	male	intact	2006-10-06	Welsh Springer Spaniel	29.1	7	25.25	905	Dry	Satiety Weight Management Dry	2015-04-24	3	2015-05-16	0	0	0	-1.2	3.14286	-1.26013	905	0	80.344	0	-0.7	-2.31023	1.71429	-1.34763
1862057	992342	Netherlands	male	intact	2006-10-06	Welsh Springer Spaniel	27.9	7	25.25	905	Dry	Satiety Weight Management Dry	2015-04-24	4	2015-06-13	1	0	0	-2.4	7.14286	-1.10891	905	0	80.344	0	-1.2	-3.9604	4	-0.990099
1862057	992342	Netherlands	male	intact	2006-10-06	Welsh Springer Spaniel	27.1	7	25.25	905	Dry	Satiety Weight Management Dry	2015-04-24	5	2015-07-04	1	1	0	-3.2	10.1429	-1.04123	905	0	80.344	0	-0.8	-2.64026	3	-0.880088
1862700	1529281	Argentina	male	neutered	2012-04-24	BichÃ³n FrisÃ©	9	7	7.5	320	Dry	Satiety Weight Management Dry	2015-04-29	1	2015-04-29	0	0	0	0	0	#N/A	266.667	-85	58.84	-18.755	0	0	0
1862700	1529281	Argentina	male	neutered	2012-04-24	BichÃ³n FrisÃ©	8.85	7	7.5	290	Dry	Satiety Weight Management Dry	2015-04-29	2	2015-05-18	0	0	-2	-0.15	2.71429	-0.614035	266.667	-85	58.84	-18.755	-0.15	-1.66667	2.71429	-0.614035
1862700	1529281	Argentina	male	neutered	2012-04-24	BichÃ³n FrisÃ©	8.75	7	7.5	260	Dry	Satiety Weight Management Dry	2015-04-29	3	2015-06-05	0	0	-2	-0.25	5.28571	-0.525526	266.667	-85	58.84	-18.755	-0.1	-1.11111	2.57143	-0.432099
1862700	1529281	Argentina	male	neutered	2012-04-24	BichÃ³n FrisÃ©	8.35	7	7.5	235	Dry	Satiety Weight Management Dry	2015-04-29	4	2015-06-27	0	0	-1	-0.65	8.42857	-0.856874	266.667	-85	58.84	-18.755	-0.4	-4.44444	3.14286	-1.41414
1862700	1529281	Argentina	male	neutered	2012-04-24	BichÃ³n FrisÃ©	7.9	7	7.5	235	Dry	Satiety Weight Management Dry	2015-04-29	5	2015-07-14	0	1	-1	-1.1	10.8571	-1.12573	266.667	-85	58.84	-18.755	-0.45	-5	2.42857	-2.05882
1863145	1522646	Germany	male	neutered	2002-03-25	Poodle	8.5	7	7.08	306	Dry	Satiety Small Dog	2015-04-29	1	2015-04-29	0	0	-2	0	0	#N/A	296.333	-29	68.274	-6.681	0	0	0
1863145	1522646	Germany	male	neutered	2002-03-25	Poodle	8.3	7	7.08	306	Dry	Satiety Small Dog	2015-04-29	2	2015-05-13	-1	0	-2	-0.2	2	-1.17647	296.333	-29	68.274	-6.681	-0.2	-2.35294	2	-1.17647
1863145	1522646	Germany	male	neutered	2002-03-25	Poodle	8.1	7	7.08	306	Dry	Satiety Small Dog	2015-04-29	3	2015-05-29	-1	1	-2	-0.4	4.28571	-1.09804	296.333	-29	68.274	-6.681	-0.2	-2.35294	2.28571	-1.02941
1863145	1522646	Germany	male	neutered	2002-03-25	Poodle	8	7	7.08	277	Dry	Satiety Small Dog	2015-04-29	4	2015-06-29	0	0	-1	-0.5	8.71429	-0.675024	296.333	-29	68.274	-6.681	-0.1	-1.17647	4.42857	-0.265655
1863145	1522646	Germany	male	neutered	2002-03-25	Poodle	7.95	7	7.08	249	Dry	Satiety Small Dog	2015-04-29	5	2015-07-29	0	0	-1	-0.55	13	-0.497738	296.333	-29	68.274	-6.681	-0.05	-0.588235	4.28571	-0.137255
1863161	1522646	Germany	male	neutered	2009-03-30	Golden Retriever	32.5	8	27.08	836	Dry	Satiety Weight Management Dry	2015-04-29	1	2015-04-29	0	0	-1	0	0	#N/A	836	0	70.424	0	0	0	0
1863161	1522646	Germany	male	neutered	2009-03-30	Golden Retriever	31	8	27.08	836	Dry	Satiety Weight Management Dry	2015-04-29	2	2015-05-13	0	1	-1	-1.5	2	-2.30769	836	0	70.424	0	-1.5	-4.61538	2	-2.30769
1863161	1522646	Germany	male	neutered	2009-03-30	Golden Retriever	30.7	8	27.08	836	Dry	Satiety Weight Management Dry	2015-04-29	3	2015-05-29	1	1	-1	-1.8	4.28571	-1.29231	836	0	70.424	0	-0.3	-0.923077	2.28571	-0.403846
1863161	1522646	Germany	male	neutered	2009-03-30	Golden Retriever	29	8	27.08	836	Dry	Satiety Weight Management Dry	2015-04-29	4	2015-06-29	1	1	0	-3.5	8.71429	-1.23581	836	0	70.424	0	-1.7	-5.23077	4.42857	-1.18114
1863161	1522646	Germany	male	neutered	2009-03-30	Golden Retriever	28.8	8	27.08	758	Dry	Satiety Weight Management Dry	2015-04-29	5	2015-07-29	0	1	0	-3.7	13	-0.87574	836	0	70.424	0	-0.2	-0.615385	4.28571	-0.14359
1863165	1522646	Germany	female	neutered	2005-04-24	Tibetan Terrier	16.8	8	14	438	Dry	Satiety Small Dog	2015-04-29	1	2015-04-29	0	0	0	0	0	#N/A	438	0	60.517	0	0	0	0
1863165	1522646	Germany	female	neutered	2005-04-24	Tibetan Terrier	16.23	8	14	438	Dry	Satiety Small Dog	2015-04-29	2	2015-05-13	0	1	-1	-0.57	2	-1.69643	438	0	60.517	0	-0.57	-3.39286	2	-1.69643
1863165	1522646	Germany	female	neutered	2005-04-24	Tibetan Terrier	16	8	14	438	Dry	Satiety Small Dog	2015-04-29	3	2015-05-29	1	1	-1	-0.8	4.28571	-1.11111	438	0	60.517	0	-0.23	-1.36905	2.28571	-0.598958
1863165	1522646	Germany	female	neutered	2005-04-24	Tibetan Terrier	15.2	8	14	438	Dry	Satiety Weight Management Dry	2015-04-29	4	2015-06-29	1	0	-1	-1.6	8.71429	-1.0929	438	0	60.517	0	-0.8	-4.7619	4.42857	-1.07527
1863165	1522646	Germany	female	neutered	2005-04-24	Tibetan Terrier	15.1	8	14	391	Dry	Satiety Weight Management Dry	2015-04-29	5	2015-07-29	1	0	-1	-1.7	13	-0.778388	438	0	60.517	0	-0.1	-0.595238	4.28571	-0.138889
1863251	1540757	Italy	male	neutered	2009-04-27	X-SMALL	4.7	8	3.9	196	Mix feeding	wet product : Satiety Weight Management Canine / dry product : Satiety Small Dog	2015-04-27	1	2015-04-27	-1	0	-3	0	0	#N/A	#N/A	#N/A	#N/A	#N/A	0	0	0
1863251	1540757	Italy	male	neutered	2009-04-27	X-SMALL	4.6	8	3.9	196	Mix feeding	wet product : Satiety Weight Management Canine / dry product : Satiety Small Dog	2015-04-27	2	2015-05-11	-1	-1	-3	-0.1	2	-1.06383	#N/A	#N/A	#N/A	#N/A	-0.1	-2.12766	2	-1.06383
1863251	1540757	Italy	male	neutered	2009-04-27	X-SMALL	4.4	8	3.9	196	Mix feeding	wet product : Satiety Weight Management Canine / dry product : Satiety Small Dog	2015-04-27	3	2015-05-25	0	0	-2	-0.3	4	-1.59574	#N/A	#N/A	#N/A	#N/A	-0.2	-4.25532	2	-2.12766
1863251	1540757	Italy	male	neutered	2009-04-27	X-SMALL	#N/A	8	3.9	#N/A			2015-04-27	4	2015-06-29	1	1	-1	#N/A	9	#N/A	#N/A	#N/A	#N/A	#N/A	#N/A	#N/A	5
1863251	1540757	Italy	male	neutered	2009-04-27	X-SMALL	4.2	8	3.9	178	Mix feeding	wet product : Satiety Weight Management Canine / dry product : Satiety Small Dog	2015-04-27	5	2015-07-28	0	0	0	-0.5	13.1429	-0.809436	#N/A	#N/A	#N/A	#N/A	#N/A	#N/A	4.14286
1863550	1230597	Italy	female	neutered	2005-11-01	Pinscher Nano	11.3	8	8.07	290	Mix feeding	wet product : Satiety Weight Management Canine / dry product : Satiety Small Dog	2015-04-27	1	2015-04-27	0	1	0	0	0	#N/A	316.667	32	66.137	6.683	0	0	0
1863550	1230597	Italy	female	neutered	2005-11-01	Pinscher Nano	10.4	8	8.07	322	Wet	Satiety Weight Management Canine	2015-04-27	2	2015-05-11	0	0	-1	-0.9	2	-3.9823	316.667	32	66.137	6.683	-0.9	-7.9646	2	-3.9823
1863550	1230597	Italy	female	neutered	2005-11-01	Pinscher Nano	10	8	8.07	322	Wet	Satiety Weight Management Canine	2015-04-27	3	2015-05-28	0	0	-1	-1.3	4.42857	-2.59777	316.667	32	66.137	6.683	-0.4	-3.53982	2.42857	-1.45757
1863550	1230597	Italy	female	neutered	2005-11-01	Pinscher Nano	9.5	8	8.07	322	Wet	Satiety Weight Management Canine	2015-04-27	4	2015-06-29	1	1	-3	-1.8	9	-1.76991	316.667	32	66.137	6.683	-0.5	-4.42478	4.57143	-0.96792
1863550	1230597	Italy	female	neutered	2005-11-01	Pinscher Nano	9.6	8	8.07	322	Wet	Satiety Weight Management Canine	2015-04-27	5	2015-07-28	-1	0	-1	-1.7	13.1429	-1.14467	316.667	32	66.137	6.683	0.1	0.884956	4.14286	0.21361
1863740	1510444	Germany	male	intact	2013-05-08	Golden Retriever	41.6	9	34.67	1148	Dry	Satiety Weight Management Dry	2015-04-29	1	2015-04-29	1	1	0	0	0	#N/A	1019.67	-220	71.366	-15.398	0	0	0
1863740	1510444	Germany	male	intact	2013-05-08	Golden Retriever	41.4	9	34.67	1038	Dry	Satiety Weight Management Dry	2015-04-29	2	2015-05-13	1	1	0	-0.2	2	-0.240385	1019.67	-220	71.366	-15.398	-0.2	-0.480769	2	-0.240385
1863740	1510444	Germany	male	intact	2013-05-08	Golden Retriever	39.9	9	34.67	1038	Dry	Satiety Weight Management Dry	2015-04-29	3	2015-05-27	1	1	0	-1.7	4	-1.02163	1019.67	-220	71.366	-15.398	-1.5	-3.60577	2	-1.80288
1863740	1510444	Germany	male	intact	2013-05-08	Golden Retriever	38.7	9	34.67	928	Dry	Satiety Weight Management Dry	2015-04-29	4	2015-06-18	1	1	0	-2.9	7.14286	-0.975962	1019.67	-220	71.366	-15.398	-1.2	-2.88462	3.14286	-0.917832
1863740	1510444	Germany	male	intact	2013-05-08	Golden Retriever	37.2	9	34.67	833	Dry	Satiety Weight Management Dry	2015-04-29	5	2015-07-14	1	1	0	-4.4	10.8571	-0.97419	1019.67	-220	71.366	-15.398	-1.5	-3.60577	3.71429	-0.970784
1863760	1512729	Argentina	male	intact	2010-09-06	Caniche	9.5	8	6.79	338	Dry	Satiety Weight Management Dry	2015-05-12	1	2015-05-12	-1	0	-1	0	0	#N/A	300.333	-65	71.4	-15.453	0	0	0
1863760	1512729	Argentina	male	intact	2010-09-06	Caniche	9.45	8	6.79	306	Dry	Satiety Weight Management Dry	2015-05-12	2	2015-05-21	0	1	0	-0.05	1.28571	-0.409357	300.333	-65	71.4	-15.453	-0.05	-0.526316	1.28571	-0.409357
1863760	1512729	Argentina	male	intact	2010-09-06	Caniche	9	8	6.79	306	Dry	Satiety Weight Management Dry	2015-05-12	3	2015-06-06	-1	-1	-1	-0.5	3.57143	-1.47368	300.333	-65	71.4	-15.453	-0.45	-4.73684	2.28571	-2.07237
1863760	1512729	Argentina	male	intact	2010-09-06	Caniche	8.9	8	6.79	273	Dry	Satiety Weight Management Dry	2015-05-12	4	2015-06-30	0	1	-3	-0.6	7	-0.902256	300.333	-65	71.4	-15.453	-0.1	-1.05263	3.42857	-0.307018
1863760	1512729	Argentina	male	intact	2010-09-06	Caniche	8.35	8	6.79	273	Dry	Satiety Weight Management Dry	2015-05-12	5	2015-07-22	1	1	-2	-1.15	10.1429	-1.19348	300.333	-65	71.4	-15.453	-0.55	-5.78947	3.14286	-1.84211
1864202	1493697	Argentina	male	neutered	2010-04-27	Chihuahua	5.1	7	4.25	209	Dry	Satiety Weight Management Dry	2015-04-27	1	2015-04-27	0	0	0	0	0	#N/A	174.333	-55	58.896	-18.581	0	0	0
1864202	1493697	Argentina	male	neutered	2010-04-27	Chihuahua	5	7	4.25	189	Dry	Satiety Weight Management Dry	2015-04-27	2	2015-05-26	0	0	0	-0.1	4.14286	-0.473293	174.333	-55	58.896	-18.581	-0.1	-1.96078	4.14286	-0.473293
1864202	1493697	Argentina	male	neutered	2010-04-27	Chihuahua	5	7	4.25	170	Dry	Satiety Weight Management Dry	2015-04-27	3	2015-06-08	0	0	0	-0.1	6	-0.326797	174.333	-55	58.896	-18.581	0	0	1.85714	0
1864202	1493697	Argentina	male	neutered	2010-04-27	Chihuahua	5	7	4.25	154	Dry	Satiety Weight Management Dry	2015-04-27	4	2015-07-03	0	0	0	-0.1	9.57143	-0.204858	174.333	-55	58.896	-18.581	0	0	3.57143	0
1864202	1493697	Argentina	male	neutered	2010-04-27	Chihuahua	5	7	4.25	141	Dry	Satiety Weight Management Dry	2015-04-27	5	2015-07-29	0	0	0	-0.1	13.2857	-0.147586	174.333	-55	58.896	-18.581	0	0	3.71429	0
1864777	1547730	Argentina	female	intact	2005-04-27	Pastor AlemÃ¡n	32.45	9	27.04	835	Dry	Satiety Weight Management Dry	2015-05-12	1	2015-05-12	0	0	-1	0	0	#N/A	922.333	131	77.783	11.048	0	0	0
1864777	1547730	Argentina	female	intact	2005-04-27	Pastor AlemÃ¡n	31	9	27.04	835	Dry	Satiety Weight Management Dry	2015-05-12	2	2015-05-30	0	0	-1	-1.45	2.57143	-1.73772	922.333	131	77.783	11.048	-1.45	-4.46841	2.57143	-1.73772
1864777	1547730	Argentina	female	intact	2005-04-27	Pastor AlemÃ¡n	27.85	9	27.04	966	Dry	Satiety Weight Management Dry	2015-05-12	3	2015-06-17	0	0	-1	-4.6	5.14286	-2.75638	922.333	131	77.783	11.048	-3.15	-9.70724	2.57143	-3.77504
1864777	1547730	Argentina	female	intact	2005-04-27	Pastor AlemÃ¡n	27.5	9	27.04	966	Dry	Satiety Weight Management Dry	2015-05-12	4	2015-07-18	0	0	-1	-4.95	9.57143	-1.59373	922.333	131	77.783	11.048	-0.35	-1.07858	4.42857	-0.243551
1864777	1547730	Argentina	female	intact	2005-04-27	Pastor AlemÃ¡n	26.8	9	27.04	966	Dry	Satiety Weight Management Dry	2015-05-12	5	2015-08-14	0	0	-1	-5.65	13.4286	-1.29659	922.333	131	77.783	11.048	-0.7	-2.15716	3.85714	-0.559265
1864784	1547730	Argentina	female	intact	2007-04-27	Teckel	9.8	9	7.54	321	Dry	Satiety Weight Management Dry	2015-05-13	1	2015-05-13	0	0	-1	0	0	#N/A	279.333	-75	61.39	-16.483	0	0	0
1864784	1547730	Argentina	female	intact	2007-04-27	Teckel	9.5	9	7.54	321	Dry	Satiety Weight Management Dry	2015-05-13	2	2015-05-28	0	0	0	-0.3	2.14286	-1.42857	279.333	-75	61.39	-16.483	-0.3	-3.06122	2.14286	-1.42857
1864784	1547730	Argentina	female	intact	2007-04-27	Teckel	9.5	9	7.54	271	Dry	Satiety Weight Management Dry	2015-05-13	3	2015-06-15	0	0	0	-0.3	4.71429	-0.649351	279.333	-75	61.39	-16.483	0	0	2.57143	0
1864784	1547730	Argentina	female	intact	2007-04-27	Teckel	9.2	9	7.54	246	Dry	Satiety Weight Management Dry	2015-05-13	4	2015-07-14	0	0	-1	-0.6	8.85714	-0.691244	279.333	-75	61.39	-16.483	-0.3	-3.06122	4.14286	-0.738916
1864784	1547730	Argentina	female	intact	2007-04-27	Teckel	8	9	7.54	246	Dry	Satiety Weight Management Dry	2015-05-13	5	2015-08-14	0	0	-1	-1.8	13.2857	-1.38249	279.333	-75	61.39	-16.483	-1.2	-12.2449	4.42857	-2.76498
1864787	1547730	Argentina	female	intact	2008-04-27	BichÃ³n FrisÃ©	5.65	8	4.71	226	Dry	Satiety Weight Management Dry	2015-05-09	1	2015-05-09	0	0	0	0	0	#N/A	226	0	70.688	0	0	0	0
1864787	1547730	Argentina	female	intact	2008-04-27	BichÃ³n FrisÃ©	5.5	8	4.71	226	Dry	Satiety Weight Management Dry	2015-05-09	2	2015-05-23	0	0	0	-0.15	2	-1.32743	226	0	70.688	0	-0.15	-2.65487	2	-1.32743
1864787	1547730	Argentina	female	intact	2008-04-27	BichÃ³n FrisÃ©	5.3	8	4.71	226	Dry	Satiety Weight Management Dry	2015-05-09	3	2015-06-13	0	0	-1	-0.35	5	-1.23894	226	0	70.688	0	-0.2	-3.53982	3	-1.17994
1864787	1547730	Argentina	female	intact	2008-04-27	BichÃ³n FrisÃ©	5	8	4.71	226	Dry	Satiety Weight Management Dry	2015-05-09	4	2015-07-17	0	0	-1	-0.65	9.85714	-1.16712	226	0	70.688	0	-0.3	-5.30973	4.85714	-1.09318
[truncated: 376 more rows]
